# Supplementary material for: Pervasive transmission of E484K and emergence of VUI-NP13L with evidence of SARS-CoV-2 co-infection events by two different lineages in Rio Grande do Sul, Brazil
Source: bioRxiv or medRxiv preprint supplement (doi:10.1101/2021.01.21.21249764), 2021-01-26
Supplement: Supplementary file [file media-1.pdf]

| Accession ID   | Location                  | Sampling Date |
|----------------|---------------------------|---------------|
| EPI_ISL_412912 | Germany                   | 25/02/2020    |
| EPI_ISL_413570 | Netherlands               | 28/02/2020    |
| EPI_ISL_414488 | Unite Kingdom             | 08/03/2020    |
| EPI_ISL_415131 | Unite Kingdom             | 29/02/2020    |
| EPI_ISL_415147 | Unite Kingdom             | 01/03/2020    |
| EPI_ISL_416028 | Brazil - São Paulo        | 03/03/2020    |
| EPI_ISL_416029 | Brazil - São Paulo        | 04/03/2020    |
| EPI_ISL_416034 | Brazil - São Paulo        | 04/03/2020    |
| EPI_ISL_416035 | Brazil - São Paulo        | 05/03/2020    |
| EPI_ISL_416036 | Brazil - São Paulo        | 05/03/2020    |
| EPI_ISL_417232 | United Kingdom            | 04/03/2020    |
| EPI_ISL_417233 | United Kingdom            | 02/03/2020    |
| EPI_ISL_417768 | Iceland                   | 10/03/2020    |
| EPI_ISL_417922 | Italy                     | 28/02/2020    |
| EPI_ISL_418002 | Portugal                  | 11/03/2020    |
| EPI_ISL_418007 | Portugal                  | 13/03/2020    |
| EPI_ISL_418023 | Portugal                  | 17/03/2020    |
| EPI_ISL_420598 | Argentina                 | 22/03/2020    |
| EPI_ISL_420599 | Argentina                 | 18/03/2020    |
| EPI_ISL_420900 | Germany                   | 12/03/2020    |
| EPI_ISL_421473 | Portugal                  | 21/03/2020    |
| EPI_ISL_422427 | Kwait                     | 16/03/2020    |
| EPI_ISL_422432 | Singapore                 | 31/03/2020    |
| EPI_ISL_422708 | Netherlands               | 22/03/2020    |
| EPI_ISL_426286 | Latvia                    | 30/03/2020    |
| EPI_ISL_426476 | Uruguay                   | 16/03/2020    |
| EPI_ISL_426477 | Uruguay                   | 16/03/2020    |
| EPI_ISL_426478 | Uruguay                   | 17/03/2020    |
| EPI_ISL_426479 | Uruguay                   | 17/03/2020    |
| EPI_ISL_426480 | Uruguay                   | 17/03/2020    |
| EPI_ISL_426481 | Uruguay                   | 17/03/2020    |
| EPI_ISL_426482 | Uruguay                   | 17/03/2020    |
| EPI_ISL_426583 | Uruguay                   | 17/03/2020    |
| EPI_ISL_426584 | Uruguay                   | 19/03/2020    |
| EPI_ISL_427292 | Brazil - Alagoas          | 18/03/2020    |
| EPI_ISL_427297 | Brazil - Distrito Federal | 23/03/2020    |
| EPI_ISL_427298 | Brazil - Distrito Federal | 22/03/2020    |
| EPI_ISL_427302 | Brazil - Rio de Janeiro   | 20/03/2020    |
| EPI_ISL_427303 | Brazil - Rio de Janeiro   | 25/03/2020    |
| EPI_ISL_427304 | Brazil - Rio de Janeiro   | 26/03/2020    |
| EPI_ISL_427305 | Brazil - Santa Catarina   | 10/03/2020    |
| EPI_ISL_427306 | Brazil - Santa Catarina   | 10/03/2020    |
| EPI_ISL_428946 | Luxembourg                | 02/04/2020    |
| EPI_ISL_429257 | Uruguay                   | 19/03/2020    |
| EPI_ISL_429688 | Brazil - Minas Gerais     | 17/03/2020    |
| EPI_ISL_430793 | Argentina                 | 01/03/2020    |
| EPI_ISL_430793 | Argentina                 | 01/03/2020    |
| EPI_ISL_430794 | Argentina                 | 24/03/2020    |

|                |                      |            |
|----------------|----------------------|------------|
| EPI_ISL_430795 | Argentina            | 26/03/2020 |
| EPI_ISL_430796 | Argentina            | 27/03/2020 |
| EPI_ISL_430797 | Argentina            | 27/03/2020 |
| EPI_ISL_430797 | Argentina            | 27/03/2020 |
| EPI_ISL_430798 | Argentina            | 28/03/2020 |
| EPI_ISL_430799 | Argentina            | 30/03/2020 |
| EPI_ISL_430800 | Argentina            | 30/03/2020 |
| EPI_ISL_430801 | Argentina            | 31/03/2020 |
| EPI_ISL_430802 | Argentina            | 31/03/2020 |
| EPI_ISL_430803 | Argentina            | 01/04/2020 |
| EPI_ISL_430804 | Argentina            | 01/04/2020 |
| EPI_ISL_430805 | Argentina            | 01/04/2020 |
| EPI_ISL_430805 | Argentina            | 01/04/2020 |
| EPI_ISL_430806 | Argentina            | 01/04/2020 |
| EPI_ISL_430807 | Argentina            | 02/04/2020 |
| EPI_ISL_430808 | Argentina            | 03/04/2020 |
| EPI_ISL_430809 | Argentina            | 04/04/2020 |
| EPI_ISL_430810 | Argentina            | 07/04/2020 |
| EPI_ISL_430811 | Argentina            | 11/04/2020 |
| EPI_ISL_430812 | Argentina            | 11/04/2020 |
| EPI_ISL_430813 | Argentina            | 11/04/2020 |
| EPI_ISL_430814 | Argentina            | 17/04/2020 |
| EPI_ISL_430815 | Argentina            | 18/04/2020 |
| EPI_ISL_430816 | Argentina            | 18/04/2020 |
| EPI_ISL_430816 | Argentina            | 18/04/2020 |
| EPI_ISL_430817 | Argentina            | 18/04/2020 |
| EPI_ISL_430818 | Argentina            | 19/04/2020 |
| EPI_ISL_434133 | USA - Washington     | 28/03/2020 |
| EPI_ISL_434803 | USA - Texas          | 19/03/2020 |
| EPI_ISL_434901 | USA - Texas          | 26/03/2020 |
| EPI_ISL_435426 | Hungary              | 21/03/2020 |
| EPI_ISL_436853 | USA - Michigan       | 24/03/2020 |
| EPI_ISL_437100 | USA - Michigan       | 13/03/2020 |
| EPI_ISL_441405 | United Kingdom       | 21/03/2020 |
| EPI_ISL_444493 | Uruguay              | 13/03/2020 |
| EPI_ISL_444626 | USA - New York       | 30/03/2020 |
| EPI_ISL_445727 | United Kingdom       | 10/04/2020 |
| EPI_ISL_450197 | Worldwide - Thailand | 14/03/2020 |
| EPI_ISL_450873 | Brazil - Amapá       | 17/03/2020 |
| EPI_ISL_452318 | USA - Michigan       | 16/03/2020 |
| EPI_ISL_453864 | Portugal             | 28/03/2020 |
| EPI_ISL_453874 | Portugal             | 27/03/2020 |
| EPI_ISL_453944 | Portugal             | 31/03/2020 |
| EPI_ISL_453960 | Portugal             | 02/04/2020 |
| EPI_ISL_453969 | Portugal             | 03/04/2020 |
| EPI_ISL_453980 | Portugal             | 04/04/2020 |
| EPI_ISL_454004 | Portugal             | 10/03/2020 |
| EPI_ISL_454057 | Portugal             | 18/03/2020 |
| EPI_ISL_454172 | Portugal             | 28/03/2020 |
| EPI_ISL_454311 | Portugal             | 28/03/2020 |

|                |                         |            |
|----------------|-------------------------|------------|
| EPI_ISL_454376 | USA - Pensylvania       | 31/03/2020 |
| EPI_ISL_455705 | Vietnam                 | 31/03/2020 |
| EPI_ISL_456071 | Brazil - Rio de Janeiro | 30/03/2020 |
| EPI_ISL_456358 | New Zealand             | 06/04/2020 |
| EPI_ISL_456362 | New Zealand             | 09/04/2020 |
| EPI_ISL_456363 | New Zealand             | 09/04/2020 |
| EPI_ISL_457940 | Uruguay                 | 17/03/2020 |
| EPI_ISL_457941 | Uruguay                 | 17/03/2020 |
| EPI_ISL_457942 | Uruguay                 | 17/03/2020 |
| EPI_ISL_457943 | Uruguay                 | 17/03/2020 |
| EPI_ISL_457944 | Uruguay                 | 17/03/2020 |
| EPI_ISL_457946 | Uruguay                 | 17/03/2020 |
| EPI_ISL_457948 | Uruguay                 | 17/03/2020 |
| EPI_ISL_457951 | Uruguay                 | 21/03/2020 |
| EPI_ISL_457952 | Uruguay                 | 21/03/2020 |
| EPI_ISL_457953 | Uruguay                 | 23/03/2020 |
| EPI_ISL_457953 | Uruguay                 | 23/03/2020 |
| EPI_ISL_457954 | Uruguay                 | 23/03/2020 |
| EPI_ISL_457956 | Uruguay                 | 25/03/2020 |
| EPI_ISL_457957 | Uruguay                 | 25/03/2020 |
| EPI_ISL_457958 | Uruguay                 | 25/03/2020 |
| EPI_ISL_457959 | Uruguay                 | 26/03/2020 |
| EPI_ISL_457960 | Uruguay                 | 28/03/2020 |
| EPI_ISL_457961 | Uruguay                 | 28/03/2020 |
| EPI_ISL_457962 | Uruguay                 | 30/03/2020 |
| EPI_ISL_457963 | Uruguay                 | 28/03/2020 |
| EPI_ISL_457964 | Uruguay                 | 01/04/2020 |
| EPI_ISL_457965 | Uruguay                 | 03/04/2020 |
| EPI_ISL_457967 | Uruguay                 | 09/04/2020 |
| EPI_ISL_457968 | Uruguay                 | 11/04/2020 |
| EPI_ISL_457969 | Uruguay                 | 14/04/2020 |
| EPI_ISL_457970 | Uruguay                 | 14/04/2020 |
| EPI_ISL_457971 | Uruguay                 | 19/04/2020 |
| EPI_ISL_457972 | Uruguay                 | 21/04/2020 |
| EPI_ISL_457973 | Uruguay                 | 22/04/2020 |
| EPI_ISL_458139 | Brazil - Acre           | 18/03/2020 |
| EPI_ISL_458149 | Brazil - Maranhão       | 06/04/2020 |
| EPI_ISL_462990 | Bosnia and Herzegovina  | 29/04/2020 |
| EPI_ISL_463649 | USA - Washington        | 04/05/2020 |
| EPI_ISL_464290 | United Kingdom          | 02/03/2020 |
| EPI_ISL_464334 | United Kingdom          | 01/03/2020 |
| EPI_ISL_464362 | United Kingdom          | 04/03/2020 |
| EPI_ISL_464413 | United Kingdom          | 01/03/2020 |
| EPI_ISL_467355 | Brazil - Rio de Janeiro | 24/04/2020 |
| EPI_ISL_467356 | Brazil - Rio de Janeiro | 24/04/2020 |
| EPI_ISL_467359 | Brazil - Rio de Janeiro | 24/04/2020 |
| EPI_ISL_467360 | Brazil - Rio de Janeiro | 25/04/2020 |
| EPI_ISL_467361 | Brazil - Rio de Janeiro | 27/04/2020 |
| EPI_ISL_468307 | Brazil - São Paulo      | 08/04/2020 |
| EPI_ISL_468308 | Brazil - São Paulo      | 23/03/2020 |

|                |                            |            |
|----------------|----------------------------|------------|
| EPI_ISL_468310 | Brazil - São Paulo         | 22/03/2020 |
| EPI_ISL_468311 | Brazil - São Paulo         | 26/03/2020 |
| EPI_ISL_468312 | Brazil - São Paulo         | 26/03/2020 |
| EPI_ISL_468313 | Brazil - São Paulo         | 23/03/2020 |
| EPI_ISL_468314 | Brazil - São Paulo         | 26/03/2020 |
| EPI_ISL_470570 | Brazil - Amazonas          | 02/04/2020 |
| EPI_ISL_470572 | Brazil - Amazonas          | 02/04/2020 |
| EPI_ISL_470577 | Brazil - Goiás             | 04/04/2020 |
| EPI_ISL_470591 | Brazil - Minas Gerais      | 17/04/2020 |
| EPI_ISL_470592 | Brazil - Minas Gerais      | 15/04/2020 |
| EPI_ISL_470595 | Brazil - Minas Gerais      | 03/04/2020 |
| EPI_ISL_470596 | Brazil - Minas Gerais      | 16/04/2020 |
| EPI_ISL_470612 | Brazil - Pernambuco        | 03/04/2020 |
| EPI_ISL_470613 | Brazil - Piauí             | 19/03/2020 |
| EPI_ISL_470614 | Brazil - Paraná            | 02/04/2020 |
| EPI_ISL_470614 | Brazil - Paraná            | 02/04/2020 |
| EPI_ISL_470651 | Brazil - Rio Grande do Sul | 20/03/2020 |
| EPI_ISL_470651 | Brazil - Rio Grande do Sul | 20/03/2020 |
| EPI_ISL_470652 | Brazil - Santa Catarina    | 18/03/2020 |
| EPI_ISL_470653 | Brazil - Santa Catarina    | 18/03/2020 |
| EPI_ISL_470653 | Brazil - Santa Catarina    | 18/03/2020 |
| EPI_ISL_470654 | Brazil - Santa Catarina    | 18/03/2020 |
| EPI_ISL_470654 | Brazil - Santa Catarina    | 18/03/2020 |
| EPI_ISL_470655 | Brazil - Santa Catarina    | 03/04/2020 |
| EPI_ISL_470655 | Brazil - Santa Catarina    | 03/04/2020 |
| EPI_ISL_471159 | Gambia                     | 21/03/2020 |
| EPI_ISL_471541 | Brazil - São Paulo         | 02/04/2020 |
| EPI_ISL_471562 | Brazil - São Paulo         | 29/04/2020 |
| EPI_ISL_471582 | Brazil - São Paulo         | 29/04/2020 |
| EPI_ISL_474594 | United Kingdom             | 27/04/2020 |
| EPI_ISL_476168 | Brazil - São Paulo         | 02/04/2020 |
| EPI_ISL_476170 | Brazil - São Paulo         | 03/04/2020 |
| EPI_ISL_476178 | Brazil - Rio de Janeiro    | 16/03/2020 |
| EPI_ISL_476188 | Brazil - Rio Grande do Sul | 19/03/2020 |
| EPI_ISL_476188 | Brazil - Rio Grande do Sul | 19/03/2020 |
| EPI_ISL_476191 | Brazil - Paraná            | 16/03/2020 |
| EPI_ISL_476191 | Brazil - Paraná            | 16/03/2020 |
| EPI_ISL_476192 | Brazil - Rio Grande do Sul | 16/03/2020 |
| EPI_ISL_476192 | Brazil - Rio Grande do Sul | 16/03/2020 |
| EPI_ISL_476195 | Brazil - São Paulo         | 16/03/2020 |
| EPI_ISL_476201 | Brazil - São Paulo         | 19/03/2020 |
| EPI_ISL_476210 | Brazil - Rio de Janeiro    | 24/03/2020 |
| EPI_ISL_476216 | Brazil - Santa Catarina    | 20/03/2020 |
| EPI_ISL_476216 | Brazil - Santa Catarina    | 20/03/2020 |
| EPI_ISL_476259 | Brazil - Santa Catarina    | 29/03/2020 |
| EPI_ISL_476259 | Brazil - Santa Catarina    | 29/03/2020 |
| EPI_ISL_476278 | Brazil - Santa Catarina    | 24/03/2020 |
| EPI_ISL_476278 | Brazil - Santa Catarina    | 24/03/2020 |
| EPI_ISL_476282 | Brazil - Paraná            | 28/03/2020 |
| EPI_ISL_476282 | Brazil - Paraná            | 28/03/2020 |

|                |                            |            |
|----------------|----------------------------|------------|
| EPI_ISL_476291 | Brazil - Rio Grande do Sul | 30/03/2020 |
| EPI_ISL_476292 | Brazil - Santa Catarina    | 30/03/2020 |
| EPI_ISL_476292 | Brazil - Santa Catarina    | 30/03/2020 |
| EPI_ISL_476297 | Brazil - Santa Catarina    | 26/03/2020 |
| EPI_ISL_476297 | Brazil - Santa Catarina    | 26/03/2020 |
| EPI_ISL_476311 | Brazil - Paraná            | 31/03/2020 |
| EPI_ISL_476312 | Brazil - Paraná            | 31/03/2020 |
| EPI_ISL_476312 | Brazil - Paraná            | 31/03/2020 |
| EPI_ISL_476313 | Brazil - Paraná            | 31/03/2020 |
| EPI_ISL_476313 | Brazil - Paraná            | 31/03/2020 |
| EPI_ISL_476314 | Brazil - Paraná            | 31/03/2020 |
| EPI_ISL_476314 | Brazil - Paraná            | 31/03/2020 |
| EPI_ISL_476316 | Brazil - Rio Grande do Sul | 31/03/2020 |
| EPI_ISL_476316 | Brazil - Rio Grande do Sul | 31/03/2020 |
| EPI_ISL_476317 | Brazil - Santa Catarina    | 31/03/2020 |
| EPI_ISL_476317 | Brazil - Santa Catarina    | 31/03/2020 |
| EPI_ISL_476318 | Brazil - Paraná            | 01/04/2020 |
| EPI_ISL_476318 | Brazil - Paraná            | 01/04/2020 |
| EPI_ISL_476319 | Brazil - Rio Grande do Sul | 01/04/2020 |
| EPI_ISL_476319 | Brazil - Rio Grande do Sul | 01/04/2020 |
| EPI_ISL_476324 | Brazil - Santa Catarina    | 01/04/2020 |
| EPI_ISL_476324 | Brazil - Santa Catarina    | 01/04/2020 |
| EPI_ISL_476335 | Brazil - Rio Grande do Sul | 02/04/2020 |
| EPI_ISL_476335 | Brazil - Rio Grande do Sul | 02/04/2020 |
| EPI_ISL_476350 | Brazil - São Paulo         | 03/04/2020 |
| EPI_ISL_476365 | Brazil - São Paulo         | 06/04/2020 |
| EPI_ISL_476370 | Brazil - Paraná            | 06/04/2020 |
| EPI_ISL_476370 | Brazil - Paraná            | 06/04/2020 |
| EPI_ISL_476374 | Brazil - São Paulo         | 02/04/2020 |
| EPI_ISL_476377 | Brazil - São Paulo         | 03/04/2020 |
| EPI_ISL_476380 | Brazil - São Paulo         | 04/04/2020 |
| EPI_ISL_476383 | Brazil - São Paulo         | 05/04/2020 |
| EPI_ISL_476384 | Brazil - São Paulo         | 05/04/2020 |
| EPI_ISL_476385 | Brazil - São Paulo         | 04/04/2020 |
| EPI_ISL_476386 | Brazil - São Paulo         | 06/04/2020 |
| EPI_ISL_476395 | Brazil - São Paulo         | 18/04/2020 |
| EPI_ISL_476413 | Brazil - São Paulo         | 30/04/2020 |
| EPI_ISL_476416 | Brazil - São Paulo         | 23/04/2020 |
| EPI_ISL_476423 | Brazil - São Paulo         | 25/04/2020 |
| EPI_ISL_476431 | Brazil - São Paulo         | 21/03/2020 |
| EPI_ISL_476433 | Brazil - São Paulo         | 18/03/2020 |
| EPI_ISL_476434 | Brazil - São Paulo         | 25/03/2020 |
| EPI_ISL_476445 | Brazil - São Paulo         | 23/03/2020 |
| EPI_ISL_476448 | Brazil - São Paulo         | 24/03/2020 |
| EPI_ISL_476451 | Brazil - São Paulo         | 20/03/2020 |
| EPI_ISL_476452 | Brazil - São Paulo         | 21/03/2020 |
| EPI_ISL_476456 | Brazil - São Paulo         | 23/03/2020 |
| EPI_ISL_476458 | Brazil - São Paulo         | 17/03/2020 |
| EPI_ISL_476467 | Brazil - São Paulo         | 23/03/2020 |
| EPI_ISL_476468 | Brazil - São Paulo         | 24/03/2020 |

|                |                    |            |
|----------------|--------------------|------------|
| EPI_ISL_476469 | Brazil - São Paulo | 24/03/2020 |
| EPI_ISL_476471 | Brazil - São Paulo | 17/03/2020 |
| EPI_ISL_476473 | Brazil - São Paulo | 23/03/2020 |
| EPI_ISL_476475 | Brazil - São Paulo | 24/03/2020 |
| EPI_ISL_476476 | Brazil - São Paulo | 24/03/2020 |
| EPI_ISL_476483 | Brazil - São Paulo | 24/03/2020 |
| EPI_ISL_476487 | Brazil - São Paulo | 24/03/2020 |
| EPI_ISL_476496 | Argentina          | 22/04/2020 |
| EPI_ISL_476561 | Argentina          | 07/05/2020 |
| EPI_ISL_476563 | Argentina          | 16/05/2020 |
| EPI_ISL_476565 | Argentina          | 09/05/2020 |
| EPI_ISL_476567 | Argentina          | 18/05/2020 |
| EPI_ISL_476568 | Argentina          | 14/05/2020 |
| EPI_ISL_476571 | Argentina          | 19/05/2020 |
| EPI_ISL_476573 | Argentina          | 22/05/2020 |
| EPI_ISL_480331 | Uruguay            | 25/04/2020 |
| EPI_ISL_480332 | Uruguay            | 07/04/2020 |
| EPI_ISL_480333 | Uruguay            | 07/04/2020 |
| EPI_ISL_480334 | Uruguay            | 07/04/2020 |
| EPI_ISL_480335 | Uruguay            | 07/04/2020 |
| EPI_ISL_480336 | Uruguay            | 25/04/2020 |
| EPI_ISL_480337 | Uruguay            | 25/04/2020 |
| EPI_ISL_480338 | Uruguay            | 25/05/2020 |
| EPI_ISL_480338 | Uruguay            | 25/05/2020 |
| EPI_ISL_480339 | Uruguay            | 25/05/2020 |
| EPI_ISL_480339 | Uruguay            | 25/05/2020 |
| EPI_ISL_480340 | Uruguay            | 25/05/2020 |
| EPI_ISL_480340 | Uruguay            | 25/05/2020 |
| EPI_ISL_480341 | Uruguay            | 25/05/2020 |
| EPI_ISL_480341 | Uruguay            | 25/05/2020 |
| EPI_ISL_480342 | Uruguay            | 25/04/2020 |
| EPI_ISL_480343 | Uruguay            | 25/04/2020 |
| EPI_ISL_480344 | Uruguay            | 07/04/2020 |
| EPI_ISL_480345 | Uruguay            | 13/04/2020 |
| EPI_ISL_480346 | Uruguay            | 25/05/2020 |
| EPI_ISL_480346 | Uruguay            | 25/05/2020 |
| EPI_ISL_480347 | Uruguay            | 20/05/2020 |
| EPI_ISL_480348 | Uruguay            | 20/05/2020 |
| EPI_ISL_480429 | Uruguay            | 10/04/2020 |
| EPI_ISL_480431 | Uruguay            | 25/04/2020 |
| EPI_ISL_480432 | Uruguay            | 07/05/2020 |
| EPI_ISL_480434 | Uruguay            | 19/05/2020 |
| EPI_ISL_480435 | Uruguay            | 19/05/2020 |
| EPI_ISL_480436 | Uruguay            | 26/05/2020 |
| EPI_ISL_480437 | Uruguay            | 26/05/2020 |
| EPI_ISL_480995 | Spain              | 04/04/2020 |
| EPI_ISL_481262 | Germany            | 27/03/2020 |
| EPI_ISL_482852 | South Africa       | 11/06/2020 |
| EPI_ISL_487370 | Greece             | 02/04/2020 |
| EPI_ISL_491218 | Portugal           | 01/06/2020 |

|                |                         |            |
|----------------|-------------------------|------------|
| EPI_ISL_491220 | Portugal                | 31/05/2020 |
| EPI_ISL_492032 | Brazil - Rio de Janeiro | 15/04/2020 |
| EPI_ISL_492033 | Brazil - Rio de Janeiro | 29/04/2020 |
| EPI_ISL_492034 | Brazil - Rio de Janeiro | 17/04/2020 |
| EPI_ISL_492035 | Brazil - Rio de Janeiro | 29/05/2020 |
| EPI_ISL_492036 | Brazil - Rio de Janeiro | 01/06/2020 |
| EPI_ISL_492038 | Brazil - Rio de Janeiro | 29/04/2020 |
| EPI_ISL_492039 | Brazil - Rio de Janeiro | 29/04/2020 |
| EPI_ISL_492040 | Brazil - Rio de Janeiro | 30/04/2020 |
| EPI_ISL_492047 | Brazil - São Paulo      | 29/05/2020 |
| EPI_ISL_492048 | Brazil - Rio de Janeiro | 01/06/2020 |
| EPI_ISL_492073 | Poland                  | 18/04/2020 |
| EPI_ISL_492077 | North Macedonia         | 27/06/2020 |
| EPI_ISL_498186 | Vietnam                 | 18/03/2020 |
| EPI_ISL_499083 | Argentina               | 15/04/2020 |
| EPI_ISL_500479 | Brazil - Pernambuco     | 13/04/2020 |
| EPI_ISL_500866 | Brazil - Pernambuco     | 07/04/2020 |
| EPI_ISL_500868 | Brazil - Pernambuco     | 07/04/2020 |
| EPI_ISL_500871 | Brazil - Pernambuco     | 09/04/2020 |
| EPI_ISL_500872 | Brazil - Pernambuco     | 08/04/2020 |
| EPI_ISL_500875 | Brazil - Pernambuco     | 13/04/2020 |
| EPI_ISL_501817 | Latvia                  | 09/07/2020 |
| EPI_ISL_502875 | Brazil - Pernambuco     | 24/06/2020 |
| EPI_ISL_508266 | India                   | 18/06/2020 |
| EPI_ISL_509233 | South Africa            | 11/07/2020 |
| EPI_ISL_510535 | Brazil - Paraná         | 08/05/2020 |
| EPI_ISL_510535 | Brazil - Paraná         | 08/05/2020 |
| EPI_ISL_511042 | Portugal                | 16/03/2020 |
| EPI_ISL_511043 | Portugal                | 16/03/2020 |
| EPI_ISL_511190 | Portugal                | 29/03/2020 |
| EPI_ISL_511458 | Portugal                | 20/03/2020 |
| EPI_ISL_511460 | Portugal                | 15/03/2020 |
| EPI_ISL_511477 | Portugal                | 16/03/2020 |
| EPI_ISL_511523 | Portugal                | 27/03/2020 |
| EPI_ISL_512617 | Ukraine                 | 10/07/2020 |
| EPI_ISL_513513 | Brazil - Rio de Janeiro | 08/04/2020 |
| EPI_ISL_513514 | Brazil - Rio de Janeiro | 08/04/2020 |
| EPI_ISL_513515 | Brazil - Rio de Janeiro | 14/04/2020 |
| EPI_ISL_513519 | Brazil - Rio de Janeiro | 30/04/2020 |
| EPI_ISL_513582 | Brazil - Rio de Janeiro | 05/05/2020 |
| EPI_ISL_513583 | Brazil - Rio de Janeiro | 05/05/2020 |
| EPI_ISL_514131 | Brazil - Rondônia       | 11/05/2020 |
| EPI_ISL_514137 | Brazil - Rondônia       | 05/05/2020 |
| EPI_ISL_514138 | Brazil - Rondônia       | 05/06/2020 |
| EPI_ISL_515520 | Brazil - São Paulo      | 30/03/2020 |
| EPI_ISL_515521 | Brazil - São Paulo      | 28/03/2020 |
| EPI_ISL_515522 | Brazil - São Paulo      | 31/03/2020 |
| EPI_ISL_515523 | Brazil - São Paulo      | 02/04/2020 |
| EPI_ISL_515524 | Brazil - São Paulo      | 01/04/2020 |
| EPI_ISL_515543 | Brazil - São Paulo      | 01/04/2020 |

|                |                              |            |
|----------------|------------------------------|------------|
| EPI_ISL_515545 | Brazil - São Paulo           | 22/03/2020 |
| EPI_ISL_515555 | Brazil - São Paulo           | 24/03/2020 |
| EPI_ISL_516430 | North Macedonia              | 14/07/2020 |
| EPI_ISL_522475 | South Korea                  | 04/07/2020 |
| EPI_ISL_523125 | Netherlands                  | 29/05/2020 |
| EPI_ISL_523955 | Brazil - São Paulo           | 02/04/2020 |
| EPI_ISL_523957 | Brazil - São Paulo           | 04/04/2020 |
| EPI_ISL_523997 | Russia                       | 29/04/2020 |
| EPI_ISL_524791 | Brazil - Maranhão            | 29/04/2020 |
| EPI_ISL_524792 | Brazil - Amapá               | 03/04/2020 |
| EPI_ISL_524797 | Brazil - Maranhão            | 24/03/2020 |
| EPI_ISL_524798 | Brazil - Rio Grande do Norte | 14/03/2020 |
| EPI_ISL_526805 | USA - Virginia               | 17/03/2020 |
| EPI_ISL_527819 | Ecuador                      | 07/04/2020 |
| EPI_ISL_528465 | Ireland                      | 12/08/2020 |
| EPI_ISL_528637 | Brazil - Rio de Janeiro      | 16/03/2020 |
| EPI_ISL_528638 | Brazil - Rio de Janeiro      | 16/03/2020 |
| EPI_ISL_529148 | Greece                       | 18/03/2020 |
| EPI_ISL_530128 | USA - Washington             | 01/08/2020 |
| EPI_ISL_539471 | Switzerland                  | 27/08/2020 |
| EPI_ISL_539851 | Hong Kong                    | 03/04/2020 |
| EPI_ISL_541340 | Brazil - Paraná              | 17/03/2020 |
| EPI_ISL_541341 | Brazil - Paraná              | 17/03/2020 |
| EPI_ISL_541342 | Brazil - Paraná              | 16/03/2020 |
| EPI_ISL_541343 | Brazil - Paraná              | 20/03/2020 |
| EPI_ISL_541343 | Brazil - Paraná              | 20/03/2020 |
| EPI_ISL_541344 | Brazil - Paraná              | 19/03/2020 |
| EPI_ISL_541344 | Brazil - Paraná              | 19/03/2020 |
| EPI_ISL_541345 | Brazil - Paraná              | 28/03/2020 |
| EPI_ISL_541346 | Brazil - Paraná              | 26/03/2020 |
| EPI_ISL_541364 | Brazil - Rio de Janeiro      | 29/04/2020 |
| EPI_ISL_541369 | Brazil - Rio de Janeiro      | 30/04/2020 |
| EPI_ISL_541370 | Brazil - Santa Catarina      | 12/03/2020 |
| EPI_ISL_541370 | Brazil - Santa Catarina      | 12/03/2020 |
| EPI_ISL_541371 | Brazil - Santa Catarina      | 13/03/2020 |
| EPI_ISL_541372 | Brazil - Sergipe             | 27/03/2020 |
| EPI_ISL_541376 | Brazil - Sergipe             | 19/03/2020 |
| EPI_ISL_541382 | Brazil - Sergipe             | 27/04/2020 |
| EPI_ISL_541385 | Brazil - Sergipe             | 26/04/2020 |
| EPI_ISL_541386 | Brazil - Sergipe             | 24/04/2020 |
| EPI_ISL_541388 | Brazil - Sergipe             | 20/04/2020 |
| EPI_ISL_541392 | Brazil - Sergipe             | 20/04/2020 |
| EPI_ISL_542250 | Italy                        | 28/02/2020 |
| EPI_ISL_544538 | USA - Texas                  | 02/04/2020 |
| EPI_ISL_547435 | Gibraltar                    | 27/07/2020 |
| EPI_ISL_547437 | Gibraltar                    | 22/07/2020 |
| EPI_ISL_554142 | United Kingdom               | 06/06/2020 |
| EPI_ISL_567404 | United Kingdom               | 10/09/2020 |
| EPI_ISL_567526 | United Kingdom               | 10/09/2020 |
| EPI_ISL_568790 | Kenya                        | 13/05/2020 |



|                |                         |            |
|----------------|-------------------------|------------|
| EPI_ISL_569241 | France                  | 12/09/2020 |
| EPI_ISL_569262 | France                  | 18/03/2020 |
| EPI_ISL_569750 | Russia                  | 19/05/2020 |
| EPI_ISL_569784 | Russia                  | 11/07/2020 |
| EPI_ISL_571522 | USA - Florida           | 21/03/2020 |
| EPI_ISL_572334 | Brazil - Pernambuco     | 08/04/2020 |
| EPI_ISL_572379 | Brazil - Pernambuco     | 07/05/2020 |
| EPI_ISL_572385 | Brazil - Pernambuco     | 10/05/2020 |
| EPI_ISL_576148 | Ukraine                 | 03/08/2020 |
| EPI_ISL_578417 | USA - Wisconsin         | 10/04/2020 |
| EPI_ISL_578451 | USA - Wisconsin         | 12/04/2020 |
| EPI_ISL_581588 | Belgium                 | 24/08/2020 |
| EPI_ISL_583052 | USA - California        | 22/06/2020 |
| EPI_ISL_583762 | Austria                 | 02/04/2020 |
| EPI_ISL_585178 | United Kingdom          | 01/04/2020 |
| EPI_ISL_587521 | United Kingdom          | 29/09/2020 |
| EPI_ISL_588845 | United Kingdom          | 25/09/2020 |
| EPI_ISL_590252 | United Kingdom          | 04/09/2020 |
| EPI_ISL_590695 | Italy                   | 07/07/2020 |
| EPI_ISL_593687 | Australia               | 02/07/2020 |
| EPI_ISL_593698 | Australia               | 04/07/2020 |
| EPI_ISL_596405 | USA - Washington        | 22/09/2020 |
| EPI_ISL_599356 | United Kingdom          | 01/10/2020 |
| EPI_ISL_603151 | Italy                   | 11/06/2020 |
| EPI_ISL_613563 | Brazil - São Paulo      | 01/04/2020 |
| EPI_ISL_613564 | Brazil - São Paulo      | 05/04/2020 |
| EPI_ISL_613707 | Brazil - São Paulo      | 24/03/2020 |
| EPI_ISL_613708 | Brazil - São Paulo      | 05/04/2020 |
| EPI_ISL_613709 | Brazil - São Paulo      | 22/03/2020 |
| EPI_ISL_615121 | Argentina               | 26/05/2020 |
| EPI_ISL_623106 | Brazil - Rio de Janeiro | 24/04/2020 |
| EPI_ISL_623107 | Brazil - Rio de Janeiro | 22/05/2020 |
| EPI_ISL_623108 | Brazil - Rio de Janeiro | 16/04/2020 |
| EPI_ISL_623110 | Brazil - Rio de Janeiro | 24/04/2020 |
| EPI_ISL_623117 | Brazil - Rio de Janeiro | 27/04/2020 |
| EPI_ISL_625560 | USA - California        | 24/07/2020 |
| EPI_ISL_627519 | United Kingdom          | 11/10/2020 |
| EPI_ISL_632071 | USA - New York          | 11/03/2020 |
| EPI_ISL_632313 | Sweden                  | 01/05/2020 |
| EPI_ISL_632480 | Netherlands             | 05/10/2020 |
| EPI_ISL_635264 | Slovenia                | 25/03/2020 |
| EPI_ISL_636461 | Slovenia                | 05/04/2020 |
| EPI_ISL_636841 | Lithuania               | 27/07/2020 |
| EPI_ISL_639687 | Latvia                  | 07/10/2020 |
| EPI_ISL_639819 | Australia               | 29/10/2020 |
| EPI_ISL_644769 | Zimbabwe                | 01/06/2020 |
| EPI_ISL_648209 | Argentina               | 22/07/2020 |
| EPI_ISL_648210 | Argentina               | 22/07/2020 |
| EPI_ISL_648211 | Argentina               | 22/07/2020 |
| EPI_ISL_648212 | Argentina               | 22/07/2020 |

|                |                            |            |
|----------------|----------------------------|------------|
| EPI_ISL_648213 | Argentina                  | 22/07/2020 |
| EPI_ISL_648214 | Argentina                  | 22/07/2020 |
| EPI_ISL_648214 | Argentina                  | 07/03/2020 |
| EPI_ISL_648215 | Argentina                  | 22/07/2020 |
| EPI_ISL_648216 | Argentina                  | 22/07/2020 |
| EPI_ISL_648217 | Argentina                  | 20/07/2020 |
| EPI_ISL_648218 | Argentina                  | 22/07/2020 |
| EPI_ISL_648218 | Argentina                  | 22/07/2020 |
| EPI_ISL_648677 | Argentina                  | 22/07/2020 |
| EPI_ISL_653900 | India                      | 25/05/2020 |
| EPI_ISL_654016 | Tunisia                    | 16/03/2020 |
| EPI_ISL_654820 | Ukraine                    | 04/08/2020 |
| EPI_ISL_660299 | Spain                      | 08/08/2020 |
| EPI_ISL_660465 | Burkina Faso               | 24/09/2020 |
| EPI_ISL_660493 | Burkina Faso               | 13/08/2020 |
| EPI_ISL_660529 | Ecuador                    | 01/10/2020 |
| EPI_ISL_667797 | Australia                  | 17/10/2020 |
| EPI_ISL_668335 | United Kingdom             | 14/11/2020 |
| EPI_ISL_671140 | Denmark                    | 26/10/2020 |
| EPI_ISL_671852 | Spain                      | 20/07/2020 |
| EPI_ISL_671968 | France                     | 21/08/2020 |
| EPI_ISL_672376 | USA - California           | 21/07/2020 |
| EPI_ISL_672681 | Brazil - Pernambuco        | 07/04/2020 |
| EPI_ISL_672683 | Brazil - Paraná            | 02/04/2020 |
| EPI_ISL_672683 | Brazil - Paraná            | 02/04/2020 |
| EPI_ISL_672684 | Brazil - Rio Grande do Sul | 07/04/2020 |
| EPI_ISL_672684 | Brazil - Rio Grande do Sul | 07/04/2020 |
| EPI_ISL_672687 | Brazil - São Paulo         | 11/04/2020 |
| EPI_ISL_672690 | Brazil - São Paulo         | 14/04/2020 |
| EPI_ISL_672728 | Brazil - São Paulo         | 18/04/2020 |
| EPI_ISL_672731 | Brazil - São Paulo         | 19/04/2020 |
| EPI_ISL_672736 | Brazil - São Paulo         | 20/04/2020 |
| EPI_ISL_677211 | USA - Virginia             | 12/11/2020 |
| EPI_ISL_677212 | USA - Virginia             | 12/11/2020 |
| EPI_ISL_677914 | Saudi Arabia               | 30/06/2020 |
| EPI_ISL_683446 | USA - Texas                | 14/04/2020 |
| EPI_ISL_683969 | USA - New York             | 13/11/2020 |
| EPI_ISL_698529 | United Arab Emirates       | 15/05/2020 |
| EPI_ISL_698744 | United Arab Emirates       | 16/05/2020 |
| EPI_ISL_698934 | United Arab Emirates       | 19/05/2020 |
| EPI_ISL_699869 | India                      | 29/06/2020 |
| EPI_ISL_700026 | India                      | 24/07/2020 |
| EPI_ISL_707793 | Tunisia                    | 11/04/2020 |
| EPI_ISL_708146 | Norway                     | 09/11/2020 |
| EPI_ISL_708185 | Turkey                     | 29/07/2020 |
| EPI_ISL_710490 | Spain                      | 25/03/2020 |
| EPI_ISL_717785 | Brazil - Rio de Janeiro    | 29/07/2020 |
| EPI_ISL_717786 | Brazil - Rio de Janeiro    | 28/07/2020 |
| EPI_ISL_717787 | Brazil - Rio de Janeiro    | 29/06/2020 |
| EPI_ISL_717788 | Brazil - Rio de Janeiro    | 27/07/2020 |

|                |                         |            |
|----------------|-------------------------|------------|
| EPI_ISL_717789 | Brazil - Rio de Janeiro | 29/07/2020 |
| EPI_ISL_717790 | Brazil - Rio de Janeiro | 28/07/2020 |
| EPI_ISL_717791 | Brazil - Rio de Janeiro | 04/11/2020 |
| EPI_ISL_717792 | Brazil - Rio de Janeiro | 29/07/2020 |
| EPI_ISL_717793 | Brazil - Rio de Janeiro | 09/10/2020 |
| EPI_ISL_717794 | Brazil - Rio de Janeiro | 29/07/2020 |
| EPI_ISL_717795 | Brazil - Rio de Janeiro | 28/07/2020 |
| EPI_ISL_717796 | Brazil - Rio de Janeiro | 29/07/2020 |
| EPI_ISL_717796 | Brazil - Rio de Janeiro | 29/07/2020 |
| EPI_ISL_717797 | Brazil - Rio de Janeiro | 29/06/2020 |
| EPI_ISL_717797 | Brazil - Rio de Janeiro | 29/06/2020 |
| EPI_ISL_717798 | Brazil - Rio de Janeiro | 28/07/2020 |
| EPI_ISL_717799 | Brazil - Rio de Janeiro | 28/07/2020 |
| EPI_ISL_717800 | Brazil - Rio de Janeiro | 29/07/2020 |
| EPI_ISL_717801 | Brazil - Rio de Janeiro | 04/11/2020 |
| EPI_ISL_717802 | Brazil - Rio de Janeiro | 04/11/2020 |
| EPI_ISL_717803 | Brazil - Rio de Janeiro | 27/07/2020 |
| EPI_ISL_717804 | Brazil - Rio de Janeiro | 28/07/2020 |
| EPI_ISL_717805 | Brazil - Rio de Janeiro | 04/11/2020 |
| EPI_ISL_717806 | Brazil - Rio de Janeiro | 03/09/2020 |
| EPI_ISL_717807 | Brazil - Rio de Janeiro | 05/11/2020 |
| EPI_ISL_717808 | Brazil - Rio de Janeiro | 03/11/2020 |
| EPI_ISL_717809 | Brazil - Rio de Janeiro | 28/09/2020 |
| EPI_ISL_717810 | Brazil - Rio de Janeiro | 14/04/2020 |
| EPI_ISL_717811 | Brazil - Rio de Janeiro | 16/04/2020 |
| EPI_ISL_717812 | Brazil - Rio de Janeiro | 01/06/2020 |
| EPI_ISL_717813 | Brazil - Rio de Janeiro | 01/06/2020 |
| EPI_ISL_717814 | Brazil - Rio de Janeiro | 03/09/2020 |
| EPI_ISL_717815 | Brazil - Rio de Janeiro | 03/09/2020 |
| EPI_ISL_717816 | Brazil - Rio de Janeiro | 03/09/2020 |
| EPI_ISL_717817 | Brazil - Rio de Janeiro | 04/09/2020 |
| EPI_ISL_717818 | Brazil - Rio de Janeiro | 08/10/2020 |
| EPI_ISL_717819 | Brazil - Rio de Janeiro | 09/10/2020 |
| EPI_ISL_717820 | Brazil - Rio de Janeiro | 26/10/2020 |
| EPI_ISL_717821 | Brazil - Rio de Janeiro | 26/10/2020 |
| EPI_ISL_717822 | Brazil - Rio de Janeiro | 26/10/2020 |
| EPI_ISL_717823 | Brazil - Rio de Janeiro | 29/10/2020 |
| EPI_ISL_717824 | Brazil - Rio de Janeiro | 29/10/2020 |
| EPI_ISL_717825 | Brazil - Rio de Janeiro | 03/11/2020 |
| EPI_ISL_717826 | Brazil - Rio de Janeiro | 03/11/2020 |
| EPI_ISL_717827 | Brazil - Rio de Janeiro | 03/11/2020 |
| EPI_ISL_717828 | Brazil - Rio de Janeiro | 04/11/2020 |
| EPI_ISL_717829 | Brazil - Rio de Janeiro | 04/11/2020 |
| EPI_ISL_717830 | Brazil - Rio de Janeiro | 05/11/2020 |
| EPI_ISL_717831 | Brazil - Rio de Janeiro | 30/10/2020 |
| EPI_ISL_717832 | Brazil - Rio de Janeiro | 01/06/2020 |
| EPI_ISL_717833 | Brazil - Rio de Janeiro | 03/06/2020 |
| EPI_ISL_717834 | Brazil - Rio de Janeiro | 02/06/2020 |
| EPI_ISL_717835 | Brazil - Rio de Janeiro | 03/06/2020 |
| EPI_ISL_717836 | Brazil - Rio de Janeiro | 03/06/2020 |

|                |                         |            |
|----------------|-------------------------|------------|
| EPI_ISL_717837 | Brazil - Rio de Janeiro | 07/04/2020 |
| EPI_ISL_717838 | Brazil - Rio de Janeiro | 08/04/2020 |
| EPI_ISL_717839 | Brazil - Rio de Janeiro | 08/04/2020 |
| EPI_ISL_717840 | Brazil - Rio de Janeiro | 13/04/2020 |
| EPI_ISL_717841 | Brazil - Rio de Janeiro | 28/07/2020 |
| EPI_ISL_717842 | Brazil - Rio de Janeiro | 16/04/2020 |
| EPI_ISL_717843 | Brazil - Rio de Janeiro | 20/04/2020 |
| EPI_ISL_717844 | Brazil - Rio de Janeiro | 24/04/2020 |
| EPI_ISL_717845 | Brazil - Rio de Janeiro | 01/06/2020 |
| EPI_ISL_717846 | Brazil - Rio de Janeiro | 01/06/2020 |
| EPI_ISL_717847 | Brazil - Rio de Janeiro | 01/06/2020 |
| EPI_ISL_717848 | Brazil - Rio de Janeiro | 01/06/2020 |
| EPI_ISL_717849 | Brazil - Rio de Janeiro | 01/06/2020 |
| EPI_ISL_717850 | Brazil - Rio de Janeiro | 01/06/2020 |
| EPI_ISL_717851 | Brazil - Rio de Janeiro | 01/06/2020 |
| EPI_ISL_717852 | Brazil - Rio de Janeiro | 01/06/2020 |
| EPI_ISL_717853 | Brazil - Rio de Janeiro | 01/07/2020 |
| EPI_ISL_717854 | Brazil - Rio de Janeiro | 01/07/2020 |
| EPI_ISL_717855 | Brazil - Rio de Janeiro | 01/07/2020 |
| EPI_ISL_717856 | Brazil - Rio de Janeiro | 02/07/2020 |
| EPI_ISL_717857 | Brazil - Rio de Janeiro | 02/07/2020 |
| EPI_ISL_717858 | Brazil - Rio de Janeiro | 02/07/2020 |
| EPI_ISL_717859 | Brazil - Rio de Janeiro | 03/07/2020 |
| EPI_ISL_717860 | Brazil - Rio de Janeiro | 06/07/2020 |
| EPI_ISL_717861 | Brazil - Rio de Janeiro | 08/07/2020 |
| EPI_ISL_717862 | Brazil - Rio de Janeiro | 08/07/2020 |
| EPI_ISL_717863 | Brazil - Rio de Janeiro | 03/08/2020 |
| EPI_ISL_717864 | Brazil - Rio de Janeiro | 03/08/2020 |
| EPI_ISL_717865 | Brazil - Rio de Janeiro | 03/08/2020 |
| EPI_ISL_717866 | Brazil - Rio de Janeiro | 03/08/2020 |
| EPI_ISL_717867 | Brazil - Rio de Janeiro | 04/08/2020 |
| EPI_ISL_717868 | Brazil - Rio de Janeiro | 05/08/2020 |
| EPI_ISL_717869 | Brazil - Rio de Janeiro | 03/09/2020 |
| EPI_ISL_717870 | Brazil - Rio de Janeiro | 04/09/2020 |
| EPI_ISL_717871 | Brazil - Rio de Janeiro | 04/09/2020 |
| EPI_ISL_717872 | Brazil - Rio de Janeiro | 04/09/2020 |
| EPI_ISL_717873 | Brazil - Rio de Janeiro | 08/09/2020 |
| EPI_ISL_717874 | Brazil - Rio de Janeiro | 09/10/2020 |
| EPI_ISL_717875 | Brazil - Rio de Janeiro | 09/10/2020 |
| EPI_ISL_717876 | Brazil - Rio de Janeiro | 09/10/2020 |
| EPI_ISL_717877 | Brazil - Rio de Janeiro | 26/10/2020 |
| EPI_ISL_717878 | Brazil - Rio de Janeiro | 26/10/2020 |
| EPI_ISL_717879 | Brazil - Rio de Janeiro | 26/10/2020 |
| EPI_ISL_717880 | Brazil - Rio de Janeiro | 26/10/2020 |
| EPI_ISL_717881 | Brazil - Rio de Janeiro | 26/10/2020 |
| EPI_ISL_717882 | Brazil - Rio de Janeiro | 26/10/2020 |
| EPI_ISL_717883 | Brazil - Rio de Janeiro | 27/10/2020 |
| EPI_ISL_717884 | Brazil - Rio de Janeiro | 27/10/2020 |
| EPI_ISL_717885 | Brazil - Rio de Janeiro | 27/10/2020 |
| EPI_ISL_717886 | Brazil - Rio de Janeiro | 27/10/2020 |

|                |                         |            |
|----------------|-------------------------|------------|
| EPI_ISL_717887 | Brazil - Rio de Janeiro | 29/10/2020 |
| EPI_ISL_717888 | Brazil - Rio de Janeiro | 29/10/2020 |
| EPI_ISL_717889 | Brazil - Rio de Janeiro | 30/10/2020 |
| EPI_ISL_717890 | Brazil - Rio de Janeiro | 03/11/2020 |
| EPI_ISL_717891 | Brazil - Rio de Janeiro | 03/11/2020 |
| EPI_ISL_717892 | Brazil - Rio de Janeiro | 03/11/2020 |
| EPI_ISL_717893 | Brazil - Rio de Janeiro | 04/11/2020 |
| EPI_ISL_717894 | Brazil - Rio de Janeiro | 04/11/2020 |
| EPI_ISL_717895 | Brazil - Rio de Janeiro | 04/11/2020 |
| EPI_ISL_717896 | Brazil - Rio de Janeiro | 04/11/2020 |
| EPI_ISL_717897 | Brazil - Rio de Janeiro | 04/11/2020 |
| EPI_ISL_717898 | Brazil - Rio de Janeiro | 05/11/2020 |
| EPI_ISL_717899 | Brazil - Rio de Janeiro | 27/07/2020 |
| EPI_ISL_717900 | Brazil - Rio de Janeiro | 27/07/2020 |
| EPI_ISL_717900 | Brazil - Rio de Janeiro | 27/07/2020 |
| EPI_ISL_717901 | Brazil - Rio de Janeiro | 30/07/2020 |
| EPI_ISL_717901 | Brazil - Rio de Janeiro | 30/07/2020 |
| EPI_ISL_717902 | Brazil - Rio de Janeiro | 27/07/2020 |
| EPI_ISL_717903 | Brazil - Rio de Janeiro | 28/07/2020 |
| EPI_ISL_717904 | Brazil - Rio de Janeiro | 28/07/2020 |
| EPI_ISL_717905 | Brazil - Rio de Janeiro | 28/07/2020 |
| EPI_ISL_717906 | Brazil - Rio de Janeiro | 29/07/2020 |
| EPI_ISL_717907 | Brazil - Rio de Janeiro | 18/07/2020 |
| EPI_ISL_717908 | Brazil - Rio de Janeiro | 01/08/2020 |
| EPI_ISL_717909 | Brazil - Rio de Janeiro | 29/07/2020 |
| EPI_ISL_717910 | Brazil - Rio de Janeiro | 31/05/2020 |
| EPI_ISL_717911 | Brazil - Rio de Janeiro | 01/06/2020 |
| EPI_ISL_717912 | Brazil - Rio de Janeiro | 02/06/2020 |
| EPI_ISL_717913 | Brazil - Rio de Janeiro | 29/07/2020 |
| EPI_ISL_717914 | Brazil - Rio de Janeiro | 29/07/2020 |
| EPI_ISL_717915 | Brazil - Rio de Janeiro | 29/07/2020 |
| EPI_ISL_717916 | Brazil - Rio de Janeiro | 29/07/2020 |
| EPI_ISL_717917 | Brazil - Rio de Janeiro | 29/07/2020 |
| EPI_ISL_717918 | Brazil - Rio de Janeiro | 02/06/2020 |
| EPI_ISL_717919 | Brazil - Rio de Janeiro | 02/06/2020 |
| EPI_ISL_717920 | Brazil - Rio de Janeiro | 29/10/2020 |
| EPI_ISL_717921 | Brazil - Rio de Janeiro | 26/10/2020 |
| EPI_ISL_717922 | Brazil - Rio de Janeiro | 29/10/2020 |
| EPI_ISL_717923 | Brazil - Rio de Janeiro | 05/11/2020 |
| EPI_ISL_717924 | Brazil - Rio de Janeiro | 29/10/2020 |
| EPI_ISL_717925 | Brazil - Rio de Janeiro | 09/10/2020 |
| EPI_ISL_717926 | Brazil - Rio de Janeiro | 26/10/2020 |
| EPI_ISL_717927 | Brazil - Rio de Janeiro | 27/10/2020 |
| EPI_ISL_717927 | Brazil - Rio de Janeiro | 27/10/2020 |
| EPI_ISL_717928 | Brazil - Rio de Janeiro | 27/10/2020 |
| EPI_ISL_717929 | Brazil - Rio de Janeiro | 27/10/2020 |
| EPI_ISL_717930 | Brazil - Rio de Janeiro | 27/10/2020 |
| EPI_ISL_717930 | Brazil - Rio de Janeiro | 27/10/2020 |
| EPI_ISL_717931 | Brazil - Rio de Janeiro | 27/10/2020 |
| EPI_ISL_717932 | Brazil - Rio de Janeiro | 29/10/2020 |

|                |                            |            |
|----------------|----------------------------|------------|
| EPI_ISL_717933 | Brazil - Rio de Janeiro    | 29/10/2020 |
| EPI_ISL_717934 | Brazil - Rio de Janeiro    | 29/10/2020 |
| EPI_ISL_717935 | Brazil - Rio de Janeiro    | 29/10/2020 |
| EPI_ISL_717936 | Brazil - Rio de Janeiro    | 29/10/2020 |
| EPI_ISL_717937 | Brazil - Rio de Janeiro    | 29/10/2020 |
| EPI_ISL_717938 | Brazil - Rio de Janeiro    | 29/10/2020 |
| EPI_ISL_717938 | Brazil - Rio de Janeiro    | 29/10/2020 |
| EPI_ISL_717939 | Brazil - Rio de Janeiro    | 29/10/2020 |
| EPI_ISL_717940 | Brazil - Rio de Janeiro    | 30/10/2020 |
| EPI_ISL_717941 | Brazil - Rio de Janeiro    | 30/10/2020 |
| EPI_ISL_717942 | Brazil - Rio de Janeiro    | 03/11/2020 |
| EPI_ISL_717943 | Brazil - Rio de Janeiro    | 03/11/2020 |
| EPI_ISL_717944 | Brazil - Rio de Janeiro    | 03/11/2020 |
| EPI_ISL_717945 | Brazil - Rio de Janeiro    | 03/11/2020 |
| EPI_ISL_717946 | Brazil - Rio de Janeiro    | 03/11/2020 |
| EPI_ISL_717947 | Brazil - Rio de Janeiro    | 03/11/2020 |
| EPI_ISL_717948 | Brazil - Rio de Janeiro    | 03/11/2020 |
| EPI_ISL_717949 | Brazil - Rio de Janeiro    | 03/11/2020 |
| EPI_ISL_717950 | Brazil - Rio de Janeiro    | 03/11/2020 |
| EPI_ISL_717951 | Brazil - Rio de Janeiro    | 04/11/2020 |
| EPI_ISL_717952 | Brazil - Rio de Janeiro    | 04/11/2020 |
| EPI_ISL_717953 | Brazil - Rio de Janeiro    | 04/11/2020 |
| EPI_ISL_717954 | Brazil - Rio de Janeiro    | 04/11/2020 |
| EPI_ISL_717955 | Brazil - Rio de Janeiro    | 05/11/2020 |
| EPI_ISL_717956 | Brazil - Rio de Janeiro    | 05/11/2020 |
| EPI_ISL_717957 | Brazil - Rio de Janeiro    | 05/11/2020 |
| EPI_ISL_717958 | Brazil - Rio de Janeiro    | 28/07/2020 |
| EPI_ISL_717959 | Brazil - Rio de Janeiro    | 03/08/2020 |
| EPI_ISL_717960 | Brazil - Rio de Janeiro    | 09/10/2020 |
| EPI_ISL_717961 | Brazil - Rio de Janeiro    | 05/11/2020 |
| EPI_ISL_717962 | Brazil - Rio de Janeiro    | 28/07/2020 |
| EPI_ISL_717963 | Brazil - Rio de Janeiro    | 29/07/2020 |
| EPI_ISL_717964 | Brazil - Rio de Janeiro    | 29/07/2020 |
| EPI_ISL_718259 | Slovakia                   | 13/11/2020 |
| EPI_ISL_718344 | United Kingdom             | 10/12/2020 |
| EPI_ISL_721721 | Switzerland                | 25/11/2020 |
| EPI_ISL_722017 | Brazil - São Paulo         | 14/05/2020 |
| EPI_ISL_722037 | Brazil - São Paulo         | 23/04/2020 |
| EPI_ISL_722050 | Brazil - São Paulo         | 25/04/2020 |
| EPI_ISL_722056 | Brazil - São Paulo         | 22/04/2020 |
| EPI_ISL_722134 | Brazil - Paraná            | 08/04/2020 |
| EPI_ISL_722135 | Brazil - Paraná            | 14/04/2020 |
| EPI_ISL_722135 | Brazil - Paraná            | 14/04/2020 |
| EPI_ISL_722136 | Brazil - Espírito Santo    | 09/04/2020 |
| EPI_ISL_722137 | Brazil - Paraná            | 09/04/2020 |
| EPI_ISL_722142 | Brazil - Paraná            | 11/04/2020 |
| EPI_ISL_722142 | Brazil - Paraná            | 11/04/2020 |
| EPI_ISL_722143 | Brazil - Rio Grande do Sul | 12/04/2020 |
| EPI_ISL_722143 | Brazil - Rio Grande do Sul | 12/04/2020 |
| EPI_ISL_722144 | Brazil - Rio Grande do Sul | 13/04/2020 |

|                |                            |            |
|----------------|----------------------------|------------|
| EPI_ISL_722144 | Brazil - Rio Grande do Sul | 13/04/2020 |
| EPI_ISL_722145 | Brazil - Pernambuco        | 15/04/2020 |
| EPI_ISL_722147 | Brazil - Rio de Janeiro    | 10/04/2020 |
| EPI_ISL_722148 | Brazil - Pernambuco        | 11/04/2020 |
| EPI_ISL_722149 | Brazil - Paraná            | 15/04/2020 |
| EPI_ISL_722149 | Brazil - Paraná            | 15/04/2020 |
| EPI_ISL_723084 | Germany                    | 02/03/2020 |
| EPI_ISL_723494 | USA - Virginia             | 12/11/2020 |
| EPI_ISL_723515 | USA - Virginia             | 24/10/2020 |
| EPI_ISL_728196 | Singapore                  | 11/12/2020 |
| EPI_ISL_728760 | Netherlands                | 25/11/2020 |
| EPI_ISL_729285 | Canada                     | 24/11/2020 |
| EPI_ISL_729310 | Canada                     | 24/11/2020 |
| EPI_ISL_729340 | Germany                    | 18/03/2020 |
| EPI_ISL_729725 | Germany                    | 03/12/2020 |
| EPI_ISL_729794 | Brazil - Rio Grande do Sul | 11/05/2020 |
| EPI_ISL_729794 | Brazil - Rio Grande do Sul | 11/05/2020 |
| EPI_ISL_729795 | Brazil - Rio Grande do Sul | 27/05/2020 |
| EPI_ISL_729795 | Brazil - Rio Grande do Sul | 27/05/2020 |
| EPI_ISL_729796 | Brazil - Rio Grande do Sul | 27/05/2020 |
| EPI_ISL_729796 | Brazil - Rio Grande do Sul | 27/05/2020 |
| EPI_ISL_729796 | Brazil - Rio Grande do Sul | 27/05/2020 |
| EPI_ISL_729797 | Brazil - Rio Grande do Sul | 06/05/2020 |
| EPI_ISL_729797 | Brazil - Rio Grande do Sul | 06/05/2020 |
| EPI_ISL_729798 | Brazil - Rio Grande do Sul | 09/05/2020 |
| EPI_ISL_729798 | Brazil - Rio Grande do Sul | 09/05/2020 |
| EPI_ISL_729799 | Brazil - Rio Grande do Sul | 15/08/2020 |
| EPI_ISL_729799 | Brazil - Rio Grande do Sul | 15/08/2020 |
| EPI_ISL_729800 | Brazil - Rio Grande do Sul | 28/05/2020 |
| EPI_ISL_729800 | Brazil - Rio Grande do Sul | 28/05/2020 |
| EPI_ISL_729801 | Brazil - Rio Grande do Sul | 13/07/2020 |
| EPI_ISL_729801 | Brazil - Rio Grande do Sul | 13/07/2020 |
| EPI_ISL_729802 | Brazil - Rio Grande do Sul | 09/08/2020 |
| EPI_ISL_729802 | Brazil - Rio Grande do Sul | 09/08/2020 |
| EPI_ISL_729803 | Brazil - Rio Grande do Sul | 14/08/2020 |
| EPI_ISL_729804 | Brazil - Rio Grande do Sul | 09/03/2020 |
| EPI_ISL_729805 | Brazil - Rio Grande do Sul | 17/03/2020 |
| EPI_ISL_729805 | Brazil - Rio Grande do Sul | 17/03/2020 |
| EPI_ISL_729806 | Brazil - Rio Grande do Sul | 16/03/2020 |
| EPI_ISL_729806 | Brazil - Rio Grande do Sul | 16/03/2020 |
| EPI_ISL_729807 | Brazil - Rio Grande do Sul | 18/03/2020 |
| EPI_ISL_729807 | Brazil - Rio Grande do Sul | 18/03/2020 |
| EPI_ISL_729808 | Brazil - Rio Grande do Sul | 19/03/2020 |
| EPI_ISL_729808 | Brazil - Rio Grande do Sul | 19/03/2020 |
| EPI_ISL_729809 | Brazil - Rio Grande do Sul | 19/03/2020 |
| EPI_ISL_729809 | Brazil - Rio Grande do Sul | 19/03/2020 |
| EPI_ISL_729810 | Brazil - Rio Grande do Sul | 20/03/2020 |
| EPI_ISL_729810 | Brazil - Rio Grande do Sul | 20/03/2020 |
| EPI_ISL_729811 | Brazil - Rio Grande do Sul | 22/03/2020 |
| EPI_ISL_729811 | Brazil - Rio Grande do Sul | 22/03/2020 |
| EPI_ISL_729812 | Brazil - Rio Grande do Sul | 20/03/2020 |





|                |                            |            |
|----------------|----------------------------|------------|
| EPI_ISL_729838 | Brazil - Rio Grande do Sul | 29/05/2020 |
| EPI_ISL_729839 | Brazil - Rio Grande do Sul | 29/05/2020 |
| EPI_ISL_729839 | Brazil - Rio Grande do Sul | 29/05/2020 |
| EPI_ISL_729840 | Brazil - Rio Grande do Sul | 28/05/2020 |
| EPI_ISL_729840 | Brazil - Rio Grande do Sul | 28/05/2020 |
| EPI_ISL_729841 | Brazil - Rio Grande do Sul | 01/06/2020 |
| EPI_ISL_729841 | Brazil - Rio Grande do Sul | 01/06/2020 |
| EPI_ISL_729842 | Brazil - Rio Grande do Sul | 01/06/2020 |
| EPI_ISL_729842 | Brazil - Rio Grande do Sul | 01/06/2020 |
| EPI_ISL_729843 | Brazil - Rio Grande do Sul | 31/05/2020 |
| EPI_ISL_729843 | Brazil - Rio Grande do Sul | 31/05/2020 |
| EPI_ISL_729844 | Brazil - Rio Grande do Sul | 17/07/2020 |
| EPI_ISL_729844 | Brazil - Rio Grande do Sul | 17/07/2020 |
| EPI_ISL_729845 | Brazil - Rio Grande do Sul | 28/07/2020 |
| EPI_ISL_729845 | Brazil - Rio Grande do Sul | 28/07/2020 |
| EPI_ISL_729846 | Brazil - Rio Grande do Sul | 29/05/2020 |
| EPI_ISL_729847 | Brazil - Rio Grande do Sul | 02/06/2020 |
| EPI_ISL_729848 | Brazil - Rio Grande do Sul | 27/07/2020 |
| EPI_ISL_729848 | Brazil - Rio Grande do Sul | 27/07/2020 |
| EPI_ISL_729849 | Brazil - Rio Grande do Sul | 12/08/2020 |
| EPI_ISL_729849 | Brazil - Rio Grande do Sul | 12/08/2020 |
| EPI_ISL_729850 | Brazil - Rio Grande do Sul | 17/07/2020 |
| EPI_ISL_729851 | Brazil - Rio Grande do Sul | 28/07/2020 |
| EPI_ISL_729851 | Brazil - Rio Grande do Sul | 28/07/2020 |
| EPI_ISL_729852 | Brazil - Rio Grande do Sul | 07/08/2020 |
| EPI_ISL_729852 | Brazil - Rio Grande do Sul | 07/08/2020 |
| EPI_ISL_729853 | Brazil - Rio Grande do Sul | 12/08/2020 |
| EPI_ISL_729853 | Brazil - Rio Grande do Sul | 12/08/2020 |
| EPI_ISL_729854 | Brazil - Rio Grande do Sul | 14/08/2020 |
| EPI_ISL_729854 | Brazil - Rio Grande do Sul | 14/08/2020 |
| EPI_ISL_729855 | Brazil - Rio Grande do Sul | 15/08/2020 |
| EPI_ISL_729855 | Brazil - Rio Grande do Sul | 15/08/2020 |
| EPI_ISL_729856 | Brazil - Rio Grande do Sul | 18/07/2020 |
| EPI_ISL_729856 | Brazil - Rio Grande do Sul | 18/07/2020 |
| EPI_ISL_729857 | Brazil - Rio Grande do Sul | 20/07/2020 |
| EPI_ISL_729857 | Brazil - Rio Grande do Sul | 20/07/2020 |
| EPI_ISL_729858 | Brazil - Rio Grande do Sul | 06/08/2020 |
| EPI_ISL_729858 | Brazil - Rio Grande do Sul | 06/08/2020 |
| EPI_ISL_729859 | Brazil - Rio Grande do Sul | 14/08/2020 |
| EPI_ISL_729859 | Brazil - Rio Grande do Sul | 14/08/2020 |
| EPI_ISL_729860 | Brazil - Rio Grande do Sul | 13/08/2020 |
| EPI_ISL_729860 | Brazil - Rio Grande do Sul | 13/08/2020 |
| EPI_ISL_729861 | Brazil - Rio Grande do Sul | 16/08/2020 |
| EPI_ISL_729861 | Brazil - Rio Grande do Sul | 16/08/2020 |
| EPI_ISL_729905 | Peru                       | 08/09/2020 |
| EPI_ISL_729919 | Peru                       | 26/08/2020 |
| EPI_ISL_729925 | Nigeria                    | 11/06/2020 |
| EPI_ISL_729969 | Nigeria                    | 30/06/2020 |
| EPI_ISL_730341 | USA - California           | 17/09/2020 |
| EPI_ISL_730576 | Turkey                     | 25/06/2020 |

|                |                    |            |
|----------------|--------------------|------------|
| EPI_ISL_731736 | United Kingdom     | 09/12/2020 |
| EPI_ISL_732116 | Portugal           | 02/12/2020 |
| EPI_ISL_732183 | Portugal           | 13/11/2020 |
| EPI_ISL_732184 | Portugal           | 13/11/2020 |
| EPI_ISL_732658 | Germany            | 07/10/2020 |
| EPI_ISL_733483 | Russia             | 02/11/2020 |
| EPI_ISL_733488 | Russia             | 11/11/2020 |
| EPI_ISL_735399 | Brazil - São Paulo | 06/04/2020 |
| EPI_ISL_735400 | Brazil - São Paulo | 09/07/2020 |
| EPI_ISL_735401 | Brazil - São Paulo | 04/07/2020 |
| EPI_ISL_735405 | Brazil - São Paulo | 16/06/2020 |
| EPI_ISL_735412 | Brazil - São Paulo | 15/06/2020 |
| EPI_ISL_735413 | Brazil - São Paulo | 17/06/2020 |
| EPI_ISL_735417 | Brazil - São Paulo | 26/06/2020 |
| EPI_ISL_735419 | Brazil - São Paulo | 01/07/2020 |
| EPI_ISL_735422 | Brazil - São Paulo | 20/06/2020 |
| EPI_ISL_735423 | Brazil - São Paulo | 01/07/2020 |
| EPI_ISL_735424 | Brazil - São Paulo | 01/07/2020 |
| EPI_ISL_736926 | South Africa       | 26/11/2020 |
| EPI_ISL_736984 | South Africa       | 25/11/2020 |
| EPI_ISL_737660 | Switzerland        | 27/11/2020 |
| EPI_ISL_737704 | Switzerland        | 14/10/2020 |
| EPI_ISL_738479 | Belgium            | 14/12/2020 |
| EPI_ISL_738493 | Belgium            | 14/12/2020 |
| EPI_ISL_741517 | United Kingdom     | 20/12/2020 |
| EPI_ISL_744368 | Luxembourg         | 25/11/2020 |
| EPI_ISL_744586 | Luxembourg         | 10/07/2020 |
| EPI_ISL_744971 | Luxembourg         | 19/10/2020 |
| EPI_ISL_745855 | USA - Utah         | 10/08/2020 |
| EPI_ISL_746799 | Chile              | 31/05/2020 |
| EPI_ISL_747200 | USA - Washington   | 08/12/2020 |
| EPI_ISL_747341 | South Korea        | 19/09/2020 |
| EPI_ISL_747421 | South Korea        | 14/11/2020 |
| EPI_ISL_747615 | Uruguay            | 05/05/2020 |
| EPI_ISL_748138 | Uruguay            | 21/05/2020 |
| EPI_ISL_748139 | Uruguay            | 21/05/2020 |
| EPI_ISL_748140 | Uruguay            | 21/05/2020 |
| EPI_ISL_748141 | Uruguay            | 21/05/2020 |
| EPI_ISL_748142 | Uruguay            | 21/05/2020 |
| EPI_ISL_748143 | Uruguay            | 21/05/2020 |
| EPI_ISL_748144 | Uruguay            | 21/05/2020 |
| EPI_ISL_748145 | Uruguay            | 21/05/2020 |
| EPI_ISL_748667 | Uruguay            | 21/05/2020 |
| EPI_ISL_749036 | Uruguay            | 28/05/2020 |
| EPI_ISL_749148 | Uruguay            | 18/06/2020 |
| EPI_ISL_749151 | Uruguay            | 18/06/2020 |
| EPI_ISL_749155 | Uruguay            | 21/06/2020 |
| EPI_ISL_749238 | Uruguay            | 21/06/2020 |
| EPI_ISL_749474 | Uruguay            | 21/06/2020 |
| EPI_ISL_749706 | Uruguay            | 21/06/2020 |

|                |                                           |            |
|----------------|-------------------------------------------|------------|
| EPI_ISL_749906 | Uruguay                                   | 21/06/2020 |
| EPI_ISL_750108 | Uruguay                                   | 21/06/2020 |
| EPI_ISL_750161 | Uruguay                                   | 21/06/2020 |
| EPI_ISL_750162 | Uruguay                                   | 22/06/2020 |
| EPI_ISL_750163 | Uruguay                                   | 05/06/2020 |
| EPI_ISL_750168 | Uruguay                                   | 24/06/2020 |
| EPI_ISL_750169 | Uruguay                                   | 25/06/2020 |
| EPI_ISL_750170 | Uruguay                                   | 25/06/2020 |
| EPI_ISL_750171 | Uruguay                                   | 26/06/2020 |
| EPI_ISL_750172 | Uruguay                                   | 26/06/2020 |
| EPI_ISL_750173 | Uruguay                                   | 27/06/2020 |
| EPI_ISL_750174 | Uruguay                                   | 27/06/2020 |
| EPI_ISL_750175 | Uruguay                                   | 16/07/2020 |
| EPI_ISL_750176 | Uruguay                                   | 08/07/2020 |
| EPI_ISL_750177 | Uruguay                                   | 17/07/2020 |
| EPI_ISL_750178 | Uruguay                                   | 19/07/2020 |
| EPI_ISL_750179 | Uruguay                                   | 30/06/2020 |
| EPI_ISL_750256 | Uruguay                                   | 01/07/2020 |
| EPI_ISL_750430 | Uruguay                                   | 01/07/2020 |
| EPI_ISL_750820 | Uruguay                                   | 02/07/2020 |
| EPI_ISL_751011 | Uruguay                                   | 02/07/2020 |
| EPI_ISL_751184 | Uruguay                                   | 06/07/2020 |
| EPI_ISL_751185 | Uruguay                                   | 20/07/2020 |
| EPI_ISL_751187 | Uruguay                                   | 21/07/2020 |
| EPI_ISL_751188 | Uruguay                                   | 21/07/2020 |
| EPI_ISL_751201 | Uruguay                                   | 20/07/2020 |
| EPI_ISL_751212 | Saudi Arabia                              | 01/04/2020 |
| EPI_ISL_753967 | Germany                                   | 20/06/2020 |
| EPI_ISL_754014 | Germany                                   | 19/08/2020 |
| EPI_ISL_754067 | Nepal                                     | 09/08/2020 |
| EPI_ISL_754079 | Singapore                                 | 14/12/2020 |
| EPI_ISL_754098 | Singapore                                 | 14/12/2020 |
| EPI_ISL_754411 | USA - New York                            | 30/11/2020 |
| EPI_ISL_755195 | USA - California                          | 04/12/2020 |
| EPI_ISL_755641 | Brazil - São Paulo                        | 01/12/2020 |
| EPI_ISL_755642 | Brazil - São Paulo                        | 05/12/2020 |
| EPI_ISL_755645 | Brazil - São Paulo                        | 08/12/2020 |
| EPI_ISL_755647 | Brazil - São Paulo                        | 08/12/2020 |
| EPI_ISL_755648 | Brazil - São Paulo                        | 08/12/2020 |
| EPI_ISL_755651 | Brazil - São Paulo                        | 10/12/2020 |
| EPI_ISL_755653 | Brazil - São Paulo                        | 12/12/2020 |
| EPI_ISL_755654 | Brazil - São Paulo                        | 11/12/2020 |
| EPI_ISL_755655 | Brazil - São Paulo                        | 11/12/2020 |
| EPI_ISL_756294 | Brazil - Bahia                            | 26/10/2020 |
| EPI_ISL_760963 | United Kingdom                            | 05/12/2020 |
| EPI_ISL_770551 | Brazil - Rio Grande do Sul - Garibaldi    | 25/11/2020 |
| EPI_ISL_770552 | Brazil - Rio Grande do Sul - Morro Reuter | 25/11/2020 |
| EPI_ISL_770553 | Brazil - Rio Grande do Sul - Canoas       | 24/11/2020 |
| EPI_ISL_770554 | Brazil - Rio Grande do Sul - Garibaldi    | 27/11/2020 |
| EPI_ISL_770555 | Brazil - Rio Grande do Sul - Sapiranga    | 23/11/2020 |

|                |                                             |            |
|----------------|---------------------------------------------|------------|
| EPI_ISL_770556 | Brazil - Rio Grande do Sul - Canoas         | 23/11/2020 |
| EPI_ISL_770557 | Brazil - Rio Grande do Sul - Butia          | 24/11/2020 |
| EPI_ISL_770558 | Brazil - Rio Grande do Sul - Porto Alegre   | 24/11/2020 |
| EPI_ISL_770559 | Brazil - Rio Grande do Sul - Garibaldi      | 24/11/2020 |
| EPI_ISL_770560 | Brazil - Rio Grande do Sul - Garibaldi      | 24/11/2020 |
| EPI_ISL_770561 | Brazil - Rio Grande do Sul - Garibaldi      | 24/11/2020 |
| EPI_ISL_770562 | Brazil - Rio Grande do Sul - Garibaldi      | 24/11/2020 |
| EPI_ISL_770563 | Brazil - Rio Grande do Sul - Garibaldi      | 24/11/2020 |
| EPI_ISL_770564 | Brazil - Rio Grande do Sul - Garibaldi      | 24/11/2020 |
| EPI_ISL_770565 | Brazil - Rio Grande do Sul - Barao          | 25/11/2020 |
| EPI_ISL_770566 | Brazil - Rio Grande do Sul - Linha Nova     | 24/11/2020 |
| EPI_ISL_770567 | Brazil - Rio Grande do Sul - Linha Nova     | 25/11/2020 |
| EPI_ISL_770568 | Brazil - Rio Grande do Sul - Linha Nova     | 25/11/2020 |
| EPI_ISL_770569 | Brazil - Rio Grande do Sul - Carlos Barbosa | 25/11/2020 |
| EPI_ISL_770570 | Brazil - Rio Grande do Sul - Carlos Barbosa | 24/11/2020 |
| EPI_ISL_770571 | Brazil - Rio Grande do Sul - Carlos Barbosa | 25/11/2020 |
| EPI_ISL_770572 | Brazil - Rio Grande do Sul - Carlos Barbosa | 24/11/2020 |
| EPI_ISL_770573 | Brazil - Rio Grande do Sul - Taquara        | 23/11/2020 |
| EPI_ISL_770574 | Brazil - Rio Grande do Sul - Taquara        | 23/11/2020 |
| EPI_ISL_770575 | Brazil - Rio Grande do Sul - Taquara        | 23/11/2020 |
| EPI_ISL_770576 | Brazil - Rio Grande do Sul - Taquara        | 23/11/2020 |
| EPI_ISL_770577 | Brazil - Rio Grande do Sul - Canoas         | 24/11/2020 |
| EPI_ISL_770578 | Brazil - Rio Grande do Sul - Canoas         | 24/11/2020 |
| EPI_ISL_770579 | Brazil - Rio Grande do Sul - Canoas         | 25/11/2020 |
| EPI_ISL_770580 | Brazil - Rio Grande do Sul - Canoas         | 25/11/2020 |
| EPI_ISL_770581 | Brazil - Rio Grande do Sul - Canoas         | 24/11/2020 |
| EPI_ISL_770582 | Brazil - Rio Grande do Sul - Porto Alegre   | 24/11/2020 |
| EPI_ISL_770583 | Brazil - Rio Grande do Sul - Canoas         | 25/11/2020 |
| EPI_ISL_770584 | Brazil - Rio Grande do Sul - Canoas         | 24/11/2020 |
| EPI_ISL_770585 | Brazil - Rio Grande do Sul - Canoas         | 24/11/2020 |
| EPI_ISL_770586 | Brazil - Rio Grande do Sul - Butia          | 25/11/2020 |
| EPI_ISL_770587 | Brazil - Rio Grande do Sul - Butia          | 25/11/2020 |
| EPI_ISL_770588 | Brazil - Rio Grande do Sul - Novo Hamburgo  | 24/11/2020 |
| EPI_ISL_770589 | Brazil - Rio Grande do Sul - Garibaldi      | 25/11/2020 |
| EPI_ISL_770590 | Brazil - Rio Grande do Sul - Garibaldi      | 25/11/2020 |
| EPI_ISL_770591 | Brazil - Rio Grande do Sul - Garibaldi      | 25/11/2020 |
| EPI_ISL_770592 | Brazil - Rio Grande do Sul - Garibaldi      | 25/11/2020 |
| EPI_ISL_770593 | Brazil - Rio Grande do Sul - Garibaldi      | 25/11/2020 |
| EPI_ISL_770594 | Brazil - Rio Grande do Sul - Garibaldi      | 25/11/2020 |
| EPI_ISL_770595 | Brazil - Rio Grande do Sul - Garibaldi      | 25/11/2020 |
| EPI_ISL_770596 | Brazil - Rio Grande do Sul - Garibaldi      | 25/11/2020 |
| EPI_ISL_770597 | Brazil - Rio Grande do Sul - Novo Hamburgo  | 25/11/2020 |
| EPI_ISL_770598 | Brazil - Rio Grande do Sul - Novo Hamburgo  | 24/11/2020 |
| EPI_ISL_770599 | Brazil - Rio Grande do Sul - Morro Reuter   | 25/11/2020 |
| EPI_ISL_770600 | Brazil - Rio Grande do Sul - Alto Feliz     | 26/11/2020 |
| EPI_ISL_770601 | Brazil - Rio Grande do Sul - Tupandi        | 25/11/2020 |
| EPI_ISL_770602 | Brazil - Rio Grande do Sul - Garibaldi      | 26/11/2020 |
| EPI_ISL_770603 | Brazil - Rio Grande do Sul - Garibaldi      | 26/11/2020 |
| EPI_ISL_770604 | Brazil - Rio Grande do Sul - Garibaldi      | 26/11/2020 |
| EPI_ISL_770605 | Brazil - Rio Grande do Sul - Garibaldi      | 26/11/2020 |

|                |                                                   |            |
|----------------|---------------------------------------------------|------------|
| EPI_ISL_770606 | Brazil - Rio Grande do Sul - Garibaldi            | 26/11/2020 |
| EPI_ISL_770607 | Brazil - Rio Grande do Sul - Garibaldi            | 26/11/2020 |
| EPI_ISL_770608 | Brazil - Rio Grande do Sul - Taquara              | 26/11/2020 |
| EPI_ISL_770609 | Brazil - Rio Grande do Sul - Taquara              | 26/11/2020 |
| EPI_ISL_770610 | Brazil - Rio Grande do Sul - Taquara              | 26/11/2020 |
| EPI_ISL_770611 | Brazil - Rio Grande do Sul - Taquara              | 26/11/2020 |
| EPI_ISL_770612 | Brazil - Rio Grande do Sul - Taquara              | 26/11/2020 |
| EPI_ISL_770613 | Brazil - Rio Grande do Sul - Tupandi              | 27/11/2020 |
| EPI_ISL_770614 | Brazil - Rio Grande do Sul - Nanuque              | 27/11/2020 |
| EPI_ISL_770615 | Brazil - Rio Grande do Sul - Morro Reuter         | 27/11/2020 |
| EPI_ISL_770616 | Brazil - Rio Grande do Sul - Carlos Barbosa       | 27/11/2020 |
| EPI_ISL_770617 | Brazil - Rio Grande do Sul - Carlos Barbosa       | 26/11/2020 |
| EPI_ISL_770618 | Brazil - Rio Grande do Sul - Butia                | 27/11/2020 |
| EPI_ISL_770619 | Brazil - Rio Grande do Sul - Butia                | 27/11/2020 |
| EPI_ISL_770620 | Brazil - Rio Grande do Sul - Garibaldi            | 27/11/2020 |
| EPI_ISL_770621 | Brazil - Rio Grande do Sul - Garibaldi            | 27/11/2020 |
| EPI_ISL_770622 | Brazil - Rio Grande do Sul - Garibaldi            | 27/11/2020 |
| EPI_ISL_770623 | Brazil - Rio Grande do Sul - Garibaldi            | 27/11/2020 |
| EPI_ISL_770624 | Brazil - Rio Grande do Sul - Garibaldi            | 27/11/2020 |
| EPI_ISL_770625 | Brazil - Rio Grande do Sul - Garibaldi            | 27/11/2020 |
| EPI_ISL_770626 | Brazil - Rio Grande do Sul - Garibaldi            | 27/11/2020 |
| EPI_ISL_770627 | Brazil - Rio Grande do Sul - Garibaldi            | 27/11/2020 |
| EPI_ISL_770628 | Brazil - Rio Grande do Sul - Garibaldi            | 28/11/2020 |
| EPI_ISL_770629 | Brazil - Rio Grande do Sul - Canoas               | 27/11/2020 |
| EPI_ISL_770630 | Brazil - Rio Grande do Sul - Bom Principio        | 30/11/2020 |
| EPI_ISL_779155 | Brazil - Rio Grande do Sul - Carlos Barbosa       | 23/11/2020 |
| EPI_ISL_779156 | Brazil - Rio Grande do Sul - Carlos Barbosa       | 23/11/2020 |
| EPI_ISL_779157 | Brazil - Rio Grande do Sul - Taquara              | 24/11/2020 |
| EPI_ISL_779158 | Brazil - Rio Grande do Sul - Taquara              | 24/11/2020 |
| EPI_ISL_779159 | Brazil - Rio Grande do Sul - Canoas               | 25/11/2020 |
| EPI_ISL_779160 | Brazil - Rio Grande do Sul - Taquara              | 25/11/2020 |
| EPI_ISL_779161 | Brazil - Rio Grande do Sul - Garibaldi            | 25/11/2020 |
| EPI_ISL_779162 | Brazil - Rio Grande do Sul - Sao Sebastiao Do Cai | 26/11/2020 |
| EPI_ISL_779163 | Brazil - Rio Grande do Sul - Garibaldi            | 26/11/2020 |
| EPI_ISL_779164 | Brazil - Rio Grande do Sul - Taquara              | 26/11/2020 |
| EPI_ISL_779165 | Brazil - Rio Grande do Sul - Butia                | 27/11/2020 |
| EPI_ISL_779166 | Brazil - Rio Grande do Sul - Butia                | 27/11/2020 |
| EPI_ISL_779167 | Brazil - Rio Grande do Sul - Garibaldi            | 27/11/2020 |
| EPI_ISL_779168 | Brazil - Rio Grande do Sul - Garibaldi            | 27/11/2020 |

---

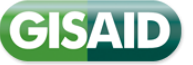

We gratefully acknowledge the following Authors from the Originating laboratories responsible for obtaining the specimens, as well as the Submitting laboratories where the genome data were generated and shared via GISAID, on which this research is based.

All Submitters of data may be contacted directly via [www.gisaid.org](http://www.gisaid.org)

**Accession ID**

EPI\_ISL\_755651

**Originating Laboratory**

Instituto Adolfo Lutz - Central

**Submitting Laboratory**

Instituto Adolfo Lutz, Interdisciplinary Procedures Center,  
Strategic Laboratory

**Authors**

Claudio Tavares Sacchi, Claudia Regina Gonçalves, Érica Valessa Ramos Gomes, Karoline Rodrigues Campos



We gratefully acknowledge the following Authors from the Originating laboratories responsible for obtaining the specimens, as well as the Submitting laboratories where the genome data were generated and shared via GISAID, on which this research is based.

All Submitters of data may be contacted directly via [www.gisaid.org](http://www.gisaid.org)

**Accession ID**

EPI\_ISL\_755653

**Originating Laboratory**

Instituto Adolfo Lutz - Central

**Submitting Laboratory**

Instituto Adolfo Lutz, Interdisciplinary Procedures Center,  
Strategic Laboratory

**Authors**

Claudio Tavares Sacchi, Claudia Regina Gonçalves, Érica Valessa Ramos Gomes, Karoline Rodrigues Campos



We gratefully acknowledge the following Authors from the Originating laboratories responsible for obtaining the specimens, as well as the Submitting laboratories where the genome data were generated and shared via GISAID, on which this research is based.

All Submitters of data may be contacted directly via [www.gisaid.org](http://www.gisaid.org)

**Accession ID**

EPI\_ISL\_755642

**Originating Laboratory**

Instituto Adolfo Lutz - Central

**Submitting Laboratory**

Instituto Adolfo Lutz, Interdisciplinary Procedures Center,  
Strategic Laboratory

**Authors**

Claudio Tavares Sacchi, Claudia Regina Gonçalves, Érica Valessa Ramos Gomes, Karoline Rodrigues Campos





We gratefully acknowledge the following Authors from the Originating laboratories responsible for obtaining the specimens, as well as the Submitting laboratories where the genome data were generated and shared via GISAID, on which this research is based.

All Submitters of data may be contacted directly via [www.gisaid.org](http://www.gisaid.org)

**Accession ID**

EPI\_ISL\_755645

**Originating Laboratory**

Lab LOC - Itapeperica da Serra

**Submitting Laboratory**

Instituto Adolfo Lutz, Interdisciplinary Procedures Center,  
Strategic Laboratory

**Authors**

Claudio Tavares Sacchi, Claudia Regina Gonçalves, Erica Valessa Ramos Gomes, Karoline Rodrigues Campos



We gratefully acknowledge the following Authors from the Originating laboratories responsible for obtaining the specimens, as well as the Submitting laboratories where the genome data were generated and shared via GISAID, on which this research is based.

All Submitters of data may be contacted directly via [www.gisaid.org](http://www.gisaid.org)

**Accession ID**

EPI\_ISL\_756294

**Originating Laboratory**

Center for Biotechnology and Cell Therapy, São Rafael  
Hospital, Salvador, Brazil

**Submitting Laboratory**

Center for Biotechnology and Cell Therapy, São Rafael  
Hospital, Salvador, Brazil

**Authors**

Carolina Kymie Vasques Nonaka, Marília Miranda Franco, Tiago Gräf, Ana Verena Almeida Mendes, Renato Santana de Aguiar, Marta Giovanetti, Bruno Solano de Freitas Souza

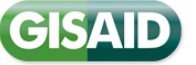

We gratefully acknowledge the following Authors from the Originating laboratories responsible for obtaining the specimens, as well as the Submitting laboratories where the genome data were generated and shared via GISAIID, on which this research is based.

All Submitters of data may be contacted directly via [www.gisaid.org](http://www.gisaid.org)

**Accession ID**  
EPI\_ISL\_755195

**Originating Laboratory**  
UCSD EXCITE lab

**Submitting Laboratory**  
Andersen lab at Scripps Research

**Authors**  
SEARCH Alliance San Diego



We gratefully acknowledge the following Authors from the Originating laboratories responsible for obtaining the specimens, as well as the Submitting laboratories where the genome data were generated and shared via GISAID, on which this research is based.

All Submitters of data may be contacted directly via [www.gisaid.org](http://www.gisaid.org)

**Accession ID**

EPI\_ISL\_755648

**Originating Laboratory**

Instituto Adolfo Lutz - Regional de Taubate

**Submitting Laboratory**

Instituto Adolfo Lutz, Interdisciplinary Procedures Center,  
Strategic Laboratory

**Authors**

Claudio Tavares Sacchi, Claudia Regina Gonçalves, Erica Valessa Ramos Gomes, Karoline Rodrigues Campos



We gratefully acknowledge the following Authors from the Originating laboratories responsible for obtaining the specimens, as well as the Submitting laboratories where the genome data were generated and shared via GISAID, on which this research is based.

All Submitters of data may be contacted directly via [www.gisaid.org](http://www.gisaid.org)

**Accession ID**

EPI\_ISL\_760963

**Originating Laboratory**

Lighthouse Lab in Milton Keynes

**Submitting Laboratory**

Wellcome Sanger Institute for the COVID-19 Genomics  
UK (COG-UK) Consortium

**Authors**

The Lighthouse Lab in Milton Keynes and Alex Alderton, Roberto Amato, Sonia Goncalves, Ewan Harrison, David K. Jackson, Ian Johnston, Dominic Kwiatkowski, Cordelia Langford, John Sillitoe on behalf of the Wellcome Sanger Institute COVID-19 Surveillance Team



We gratefully acknowledge the following Authors from the Originating laboratories responsible for obtaining the specimens, as well as the Submitting laboratories where the genome data were generated and shared via GISAID, on which this research is based.

All Submitters of data may be contacted directly via [www.gisaid.org](http://www.gisaid.org)

**Accession ID**

EPI\_ISL\_755655

**Originating Laboratory**

Instituto Adolfo Lutz - Regional de Campinas

**Submitting Laboratory**

Instituto Adolfo Lutz, Interdisciplinary Procedures Center,  
Strategic Laboratory

**Authors**

Claudio Tavares Sacchi, Claudia Regina Gonçalves, Érica Valessa Ramos Gomes, Karoline Rodrigues Campos

We gratefully acknowledge the following Authors from the Originating laboratories responsible for obtaining the specimens, as well as the Submitting laboratories where the genome data were generated and shared via GISAID, on which this research is based.

All Submitters of data may be contacted directly via [www.gisaid.org](http://www.gisaid.org)

| Accession ID                                                                                                                                                                                                                                                                                                                                                                                                                                                                                                                                                                                                                                                                                                                                                                                                                                                                                                                                                                                                                                                                                                                   | Originating Laboratory     | Submitting Laboratory                                                                            | Authors                                                                                                                                                                                                                                                                                                                                                                                                                                                                                                                                                                                                                                                                                            |                                                                                                                                                                            |
|--------------------------------------------------------------------------------------------------------------------------------------------------------------------------------------------------------------------------------------------------------------------------------------------------------------------------------------------------------------------------------------------------------------------------------------------------------------------------------------------------------------------------------------------------------------------------------------------------------------------------------------------------------------------------------------------------------------------------------------------------------------------------------------------------------------------------------------------------------------------------------------------------------------------------------------------------------------------------------------------------------------------------------------------------------------------------------------------------------------------------------|----------------------------|--------------------------------------------------------------------------------------------------|----------------------------------------------------------------------------------------------------------------------------------------------------------------------------------------------------------------------------------------------------------------------------------------------------------------------------------------------------------------------------------------------------------------------------------------------------------------------------------------------------------------------------------------------------------------------------------------------------------------------------------------------------------------------------------------------------|----------------------------------------------------------------------------------------------------------------------------------------------------------------------------|
| EPI_ISL_417934                                                                                                                                                                                                                                                                                                                                                                                                                                                                                                                                                                                                                                                                                                                                                                                                                                                                                                                                                                                                                                                                                                                 | Laboratório Hermes Pardini | Bioinformatics Laboratory - LNCC                                                                 | Filipe Romero, Ana Paula Guimarães, Mariane Talon, Luiz Gonzaga Paula de Almeida, Ronaldo da Silva Francisco Junior, Diana Mariani, Lídia Boulosa, Alexandra Gerber, Jaqueline Goes de Jesus, Ingra Morales Claro, Ester Cerdeira Sabino, Nuno Rodrigues Faria, Terezinha Marta Pereira, Pinto Castifeiras, Isabela de Carvalho Leilão, Rafael de Mello Gallez, Cássia Cristina Alves Gonçalves, Érica Ramos dos Santos Nascimento, Richard Araújo Maia, Mauro Teixeira, Cristiano Xavier Lima, Orlando Ferreira Jr., Rodrigo Brindeiro, Luciana Jesus Costa e André Felipe Santos, Laboratório Hermes Pardini, Laboratório Simile, Amílcar Tanuri, Renato Santana Aguiar e Ana Tereza Vasconcelos |                                                                                                                                                                            |
| EPI_ISL_470651                                                                                                                                                                                                                                                                                                                                                                                                                                                                                                                                                                                                                                                                                                                                                                                                                                                                                                                                                                                                                                                                                                                 | Hermes Pardini             | Bioinformatics Laboratory / LNCC                                                                 | Alexandra Gerber, Ana Paula Guimarães, Luiz Gonzaga Paula de Almeida, Ronaldo da Silva Francisco Junior, Mariane Talon, Filipe Romero, Áttila Duque Rossi, Terezinha Marta Pereira, working group UFRJ, Jaqueline Goes de Jesus, Ingra Morales Claro, Ester Cerdeira Sabino, Nuno Rodrigues Faria, CADDE-group, Laboratório Hermes Pardini, Laboratório Simile, working group UFMG, Amílcar Tanuri, Carolina Voloch, Renato Santana Aguiar e Ana Tereza Vasconcelos                                                                                                                                                                                                                                |                                                                                                                                                                            |
| EPI_ISL_476175, EPI_ISL_476177, EPI_ISL_476187, EPI_ISL_476188, EPI_ISL_476192, EPI_ISL_476291, EPI_ISL_476315, EPI_ISL_476316, EPI_ISL_476319, EPI_ISL_476323, EPI_ISL_476335                                                                                                                                                                                                                                                                                                                                                                                                                                                                                                                                                                                                                                                                                                                                                                                                                                                                                                                                                 | DB Diagnósticos do Brasil  | Instituto de Medicina Tropical da Universidade de São Paulo                                      | Samples: Nelson Gaburo Jr; Sequencing: Ingra Morales Claro, Jaqueline Goes de Jesus, Erika Regina Manuli, Flavia Cristina da Silva Sales, Thais de Moura Coletti, Camila Alves Maia da Silva, Mariana Severo Ramundo, Giula Magalhaes Ferreira, Darlan da Silva Candido, Julien Theze, Nuno Faria, Ester Sabino                                                                                                                                                                                                                                                                                                                                                                                    |                                                                                                                                                                            |
| EPI_ISL_672684, EPI_ISL_722143, EPI_ISL_722144, EPI_ISL_722168                                                                                                                                                                                                                                                                                                                                                                                                                                                                                                                                                                                                                                                                                                                                                                                                                                                                                                                                                                                                                                                                 | DB Diagnosticos do Brasil  | Laboratório de Parasitologia Médica - Instituto de Medicina Tropical - Universidade de São Paulo | Brazil-UK Centre for Arbovirus Discovery Diagnosis Genomics and Epidemiology (CADDE) Genomic Network - Instituto de Medicina Tropical                                                                                                                                                                                                                                                                                                                                                                                                                                                                                                                                                              |                                                                                                                                                                            |
| EPI_ISL_729794, EPI_ISL_729795, EPI_ISL_729796, EPI_ISL_729797, EPI_ISL_729798, EPI_ISL_729799, EPI_ISL_729800, EPI_ISL_729801, EPI_ISL_729802, EPI_ISL_729803, EPI_ISL_729804, EPI_ISL_729805, EPI_ISL_729806, EPI_ISL_729807, EPI_ISL_729808, EPI_ISL_729809, EPI_ISL_729810, EPI_ISL_729811, EPI_ISL_729812, EPI_ISL_729813, EPI_ISL_729814, EPI_ISL_729815, EPI_ISL_729816, EPI_ISL_729817, EPI_ISL_729818, EPI_ISL_729819, EPI_ISL_729820, EPI_ISL_729821, EPI_ISL_729822, EPI_ISL_729823, EPI_ISL_729824, EPI_ISL_729825, EPI_ISL_729826, EPI_ISL_729827, EPI_ISL_729828, EPI_ISL_729829, EPI_ISL_729830, EPI_ISL_729831, EPI_ISL_729832, EPI_ISL_729833, EPI_ISL_729834, EPI_ISL_729835, EPI_ISL_729836, EPI_ISL_729837, EPI_ISL_729838, EPI_ISL_729839, EPI_ISL_729840, EPI_ISL_729841, EPI_ISL_729842, EPI_ISL_729843, EPI_ISL_729844, EPI_ISL_729845, EPI_ISL_729846, EPI_ISL_729847, EPI_ISL_729848, EPI_ISL_729849, EPI_ISL_729850, EPI_ISL_729851, EPI_ISL_729852, EPI_ISL_729853, EPI_ISL_729854, EPI_ISL_729855, EPI_ISL_729856, EPI_ISL_729857, EPI_ISL_729858, EPI_ISL_729859, EPI_ISL_729860, EPI_ISL_729861 | see above                  | Laboratorio Central de Saude Publica do Estado do Rio Grande do Sul (LACEN-RS)                   | Laboratory of Respiratory Viruses and Measles, Oswaldo Cruz Institute, FIOCRUZ                                                                                                                                                                                                                                                                                                                                                                                                                                                                                                                                                                                                                     | Paola Resende, Luciana Appolinario, Fernando Motta, Anna Carolina Paixão, Ana Carolina Mendonça, Tatiana Schaffer Gregianini, Marilda Tereza Mar da Rosa, Marilda Siqueira |

We gratefully acknowledge the following Authors from the Originating laboratories responsible for obtaining the specimens, as well as the Submitting laboratories where the genome data were generated and shared via GISAID, on which this research is based.

All Submitters of data may be contacted directly via [www.gisaid.org](http://www.gisaid.org)

| Accession ID                                                                                                                                                   | Originating Laboratory                                                                                                                                                                                                           | Submitting Laboratory                                                                          | Authors                                                                                                                                                                                                                                                                                                                                                                                                   |
|----------------------------------------------------------------------------------------------------------------------------------------------------------------|----------------------------------------------------------------------------------------------------------------------------------------------------------------------------------------------------------------------------------|------------------------------------------------------------------------------------------------|-----------------------------------------------------------------------------------------------------------------------------------------------------------------------------------------------------------------------------------------------------------------------------------------------------------------------------------------------------------------------------------------------------------|
| EPI_ISL_420598, EPI_ISL_420599, EPI_ISL_420600                                                                                                                 | Servicio Virosis Respiratorias-Departamento Virología-INEI                                                                                                                                                                       | Instituto Nacional Enfermedades Infecciosas C.G.Malbran                                        | Baumeister E., Avaro M., Benedetti E., Russo M., Dattero ME, Pontoriero A., Cisterna D., Molina V., Perandones C., Tuduri E., Lorenzo F., Poklepovich T., Campos J.                                                                                                                                                                                                                                       |
| EPI_ISL_430793, EPI_ISL_430794                                                                                                                                 | Laboratorio Análisis Clínicos, Unidad de Servicios Diagnósticos, Swiss Medical Group                                                                                                                                             | Área de Secuenciación del Laboratorio de Virología del Hospital de Niños Dr. Ricardo Gutierrez | Nabaes Jodar, MS; Goya, S; Natale, MI; Lusso, S; Sanchez, O; Guevara, D; Vicario, SM; Mistchenko, AS; Valinotto, LE; Viegas, M.                                                                                                                                                                                                                                                                           |
| EPI_ISL_430795                                                                                                                                                 | Laboratorio de Virología del Hospital de Niños Dr. Ricardo Gutierrez                                                                                                                                                             | Área de Secuenciación del Laboratorio de Virología del Hospital de Niños Dr. Ricardo Gutierrez | Nabaes Jodar, MS; Goya, S; Natale, MI; Lusso, S; Gravis, E; Mistchenko, AS; Valinotto, LE; Viegas, M.                                                                                                                                                                                                                                                                                                     |
| EPI_ISL_430796, EPI_ISL_430797, EPI_ISL_430798                                                                                                                 | Departamento de Biología y genética molecular, IACA Laboratorios.                                                                                                                                                                | Área de Secuenciación del Laboratorio de Virología del Hospital de Niños Dr. Ricardo Gutierrez | Nabaes Jodar, MS; Goya, S; Natale, MI; Lusso, S; Tittarelli, E; Suárez, A; Masciovecchio MV; Streitenberger ER; Mistchenko, AS; Valinotto, LE; Viegas, M.                                                                                                                                                                                                                                                 |
| EPI_ISL_430799, EPI_ISL_430800, EPI_ISL_430801                                                                                                                 | Laboratorio de Virología del Hospital de Niños Dr. Ricardo Gutierrez                                                                                                                                                             | Área de Secuenciación del Laboratorio de Virología del Hospital de Niños Dr. Ricardo Gutierrez | Nabaes Jodar, MS; Goya, S; Natale, MI; Lusso, S; Gravis, E; Mistchenko, AS; Valinotto, LE; Viegas, M.                                                                                                                                                                                                                                                                                                     |
| EPI_ISL_430802                                                                                                                                                 | Departamento de Biología y genética molecular, IACA Laboratorios.                                                                                                                                                                | Área de Secuenciación del Laboratorio de Virología del Hospital de Niños Dr. Ricardo Gutierrez | Nabaes Jodar, MS; Goya, S; Natale, MI; Lusso, S; Tittarelli, E; Suárez, A; Masciovecchio MV; Streitenberger ER; Mistchenko, AS; Valinotto, LE; Viegas, M.                                                                                                                                                                                                                                                 |
| EPI_ISL_430803, EPI_ISL_430804                                                                                                                                 | Laboratorio de Virología del Hospital de Niños Dr. Ricardo Gutierrez                                                                                                                                                             | Área de Secuenciación del Laboratorio de Virología del Hospital de Niños Dr. Ricardo Gutierrez | Nabaes Jodar, MS; Goya, S; Natale, MI; Lusso, S; Gravis, E; Mistchenko, AS; Valinotto, LE; Viegas, M.                                                                                                                                                                                                                                                                                                     |
| EPI_ISL_430805, EPI_ISL_430806                                                                                                                                 | Departamento de Biología y genética molecular, IACA Laboratorios.                                                                                                                                                                | Área de Secuenciación del Laboratorio de Virología del Hospital de Niños Dr. Ricardo Gutierrez | Nabaes Jodar, MS; Goya, S; Natale, MI; Lusso, S; Tittarelli, E; Suárez, A; Masciovecchio MV; Streitenberger ER; Mistchenko, AS; Valinotto, LE; Viegas, M.                                                                                                                                                                                                                                                 |
| EPI_ISL_430807                                                                                                                                                 | Laboratorio de Virología del Hospital de Niños Dr. Ricardo Gutierrez                                                                                                                                                             | Área de Secuenciación del Laboratorio de Virología del Hospital de Niños Dr. Ricardo Gutierrez | Nabaes Jodar, MS; Goya, S; Natale, MI; Lusso, S; Gravis, E; Mistchenko, AS; Valinotto, LE; Viegas, M.                                                                                                                                                                                                                                                                                                     |
| EPI_ISL_430808                                                                                                                                                 | Departamento de Biología y genética molecular, IACA Laboratorios.                                                                                                                                                                | Área de Secuenciación del Laboratorio de Virología del Hospital de Niños Dr. Ricardo Gutierrez | Nabaes Jodar, MS; Goya, S; Natale, MI; Lusso, S; Tittarelli, E; Suárez, A; Masciovecchio MV; Streitenberger ER; Mistchenko, AS; Valinotto, LE; Viegas, M.                                                                                                                                                                                                                                                 |
| EPI_ISL_430809, EPI_ISL_430810, EPI_ISL_430811, EPI_ISL_430812, EPI_ISL_430813, EPI_ISL_430814, EPI_ISL_430815, EPI_ISL_430816, EPI_ISL_430817, EPI_ISL_430818 | Laboratorio de Virología del Hospital de Niños Dr. Ricardo Gutierrez                                                                                                                                                             | Área de Secuenciación del Laboratorio de Virología del Hospital de Niños Dr. Ricardo Gutierrez | Nabaes Jodar, MS; Goya, S; Natale, MI; Lusso, S; Gravis, E; Mistchenko, AS; Valinotto, LE; Viegas, M.                                                                                                                                                                                                                                                                                                     |
| EPI_ISL_476496                                                                                                                                                 | Hospital Garrahan                                                                                                                                                                                                                | Héritas                                                                                        | Dalmacio Pereyra, Roberta Crespo, Mauricio Grisolia, Cristian Rohr, Andrea Mangano, María Florencia Fernandez, Fabian Fay, Martín Vazquez                                                                                                                                                                                                                                                                 |
| EPI_ISL_476561                                                                                                                                                 | Hospital Garrahan                                                                                                                                                                                                                | Héritas                                                                                        | Roberta Crespo, Dalmacio Pereyra, Mauricio Grisolia, Cristian Rohr, Andrea Mangano, María Florencia Fernandez, Fabian Fay, Martín Vazquez                                                                                                                                                                                                                                                                 |
| EPI_ISL_476563                                                                                                                                                 | Hospital de Pediatría "Prof. Dr. Juan P Garrahan"                                                                                                                                                                                | Héritas                                                                                        | Dalmacio Pereyra, Roberta Crespo, Mauricio Grisolia, Cristian Rohr, Andrea Mangano, María Florencia Fernandez, Fabian Fay, Martín Vazquez                                                                                                                                                                                                                                                                 |
| EPI_ISL_476565                                                                                                                                                 | Hospital de Pediatría "Prof. Dr. Juan P Garrahan"                                                                                                                                                                                | Héritas                                                                                        | Andrea Mangano, María Florencia Fernandez, Dalmacio Pereyra, Roberta Crespo, Mauricio Grisolia, Cristian Rohr, Fabian Fay, Martín Vazquez                                                                                                                                                                                                                                                                 |
| EPI_ISL_476567                                                                                                                                                 | Hospital de Pediatría "Prof. Dr. Juan P Garrahan"                                                                                                                                                                                | Héritas                                                                                        | Dalmacio Pereyra, Roberta Crespo, Mauricio Grisolia, Cristian Rohr, Andrea Mangano, María Florencia Fernandez, Fabian Fay, Martín Vazquez                                                                                                                                                                                                                                                                 |
| EPI_ISL_476568                                                                                                                                                 | Hospital de Pediatría "Prof. Dr. Juan P Garrahan"                                                                                                                                                                                | Héritas                                                                                        | Cristian Rohr, Andrea Mangano, María Florencia Fernandez, Dalmacio Pereyra, Roberta Crespo, Mauricio Grisolia, Fabian Fay, Martín Vazquez                                                                                                                                                                                                                                                                 |
| EPI_ISL_476571, EPI_ISL_476573                                                                                                                                 | Hospital de Pediatría "Prof. Dr. Juan P Garrahan"                                                                                                                                                                                | Héritas                                                                                        | Dalmacio Pereyra, Roberta Crespo, Mauricio Grisolia, Cristian Rohr, Andrea Mangano, María Florencia Fernandez, Fabian Fay, Martín Vazquez                                                                                                                                                                                                                                                                 |
| EPI_ISL_499083                                                                                                                                                 | Instituto de Virología "Dr. J. M. Vanella", Facultad de Ciencias Medicas, Universidad Nacional de Cordoba. Laboratorio Central de la Provincia de Cordoba, Argentina. Ministerio de Salud de la provincia de Cordoba, Argentina. | Laboratorio de Virología, Hospital de Niños Ricardo Gutiérrez, CABA, Argentina.                | Sandra Gallego, Brenda Konigheim, Sebastian Blanco, Lorena Spinsanti, Javier Aguilar, Adrian Diaz, Gonzalo Castro, Gabriela Barbas, Mercedes Nabaes, Stephanie Goya, Monica Natale, Silvina Lusso, Mariana Viegas.                                                                                                                                                                                        |
| EPI_ISL_615121                                                                                                                                                 | Hospital de Pediatría "Prof. Dr. Juan P Garrahan"                                                                                                                                                                                | Héritas                                                                                        | Cristian Rohr, Bianca Brun, Dalmacio Pereyra, Priscila Aldabe, Andrea Mangano, María Florencia Fernandez, Fabian Fay, Martín Vazquez                                                                                                                                                                                                                                                                      |
| EPI_ISL_648209, EPI_ISL_648210, EPI_ISL_648211, EPI_ISL_648212, EPI_ISL_648213, EPI_ISL_648214, EPI_ISL_648215, EPI_ISL_648216                                 | INBIRS-UBA                                                                                                                                                                                                                       | Laboratorio Mixto de Biotecnología Acuática (LMBA)                                             | Joaquín Ezpeleta, Ignacio García Labarí, Victoria Posner, Vanina Villanova, Pablo Casal, Sofia Lavista Llanos, Federico Remes Lenicov, Ana Paletta, Flavio Spetale, Agustina Cerri, Silvana Spinelli, Elisa Bolatti, Diego Chouhy, María Re, Gastón Viarengo, Ana Cavatorta, Julian Acosta, Javier Murillo, Laura Angelone, Leandro Ciappina, Pilar Bulacio, Adriana Giri, Silvia Arranz, Elizabeth Tapia |
| EPI_ISL_648217                                                                                                                                                 | SILAB                                                                                                                                                                                                                            | Laboratorio Mixto de Biotecnología Acuática (LMBA)                                             | Joaquín Ezpeleta, Ignacio García Labarí, Victoria Posner, Vanina Villanova, Pablo Casal, Sofia Lavista Llanos, Federico Remes Lenicov, Ana Paletta, Flavio Spetale, Agustina Cerri, Silvana Spinelli, Elisa Bolatti, Diego Chouhy, María Re, Gastón Viarengo, Ana Cavatorta, Julian Acosta, Javier Murillo, Laura Angelone, Leandro Ciappina, Pilar Bulacio, Adriana Giri, Silvia Arranz, Elizabeth Tapia |
| EPI_ISL_648218, EPI_ISL_648677                                                                                                                                 | INBIRS-UBA                                                                                                                                                                                                                       | Laboratorio Mixto de Biotecnología Acuática (LMBA)                                             | Joaquín Ezpeleta, Ignacio García Labarí, Victoria Posner, Vanina Villanova, Pablo Casal, Sofia Lavista Llanos, Federico Remes Lenicov, Ana Paletta, Flavio Spetale, Agustina Cerri, Silvana Spinelli, Elisa Bolatti, Diego Chouhy, María Re, Gastón Viarengo, Ana Cavatorta, Julian Acosta, Javier Murillo, Laura Angelone, Leandro Ciappina, Pilar Bulacio, Adriana Giri, Silvia Arranz, Elizabeth Tapia |



We gratefully acknowledge the following Authors from the Originating laboratories responsible for obtaining the specimens, as well as the Submitting laboratories where the genome data were generated and shared via GISAIID, on which this research is based.

All Submitters of data may be contacted directly via [www.gisaid.org](http://www.gisaid.org)

| Accession ID                                                                                                                                                                   | Originating Laboratory                                       | Submitting Laboratory                                                                            | Authors                                                                                                                                                                                                                                                                                                                                                                                                                                                            |
|--------------------------------------------------------------------------------------------------------------------------------------------------------------------------------|--------------------------------------------------------------|--------------------------------------------------------------------------------------------------|--------------------------------------------------------------------------------------------------------------------------------------------------------------------------------------------------------------------------------------------------------------------------------------------------------------------------------------------------------------------------------------------------------------------------------------------------------------------|
| EPI_ISL_470614                                                                                                                                                                 | Hermes Pardini                                               | Bioinformatics Laboratory / LNCC                                                                 | Alexandra Gerber, Ana Paula Guimarães, Luiz Gonzaga Paula de Almeida, Ronaldo da Silva Francisco Junior, Mariane Talon, Filipe Romero, Átila Duque Rossi, Terezinha Marta Pereira, working group UFRJ, Jaqueline Goes de Jesus, Ingra Morales Claro, Ester Cerdeira Sabino, Nuno Rodrigues Faria, CADDE-group, Laboratorio Hermes Pardini, Laboratorio Simile, working group UFMG, Amílcar Tanuri, Carolina Voloch, Renato Santana Aguiar e Ana Tereza Vasconcelos |
| EPI_ISL_476191, EPI_ISL_476202, EPI_ISL_476280, EPI_ISL_476282, EPI_ISL_476311, EPI_ISL_476312, EPI_ISL_476313, EPI_ISL_476314, EPI_ISL_476318, EPI_ISL_476325, EPI_ISL_476370 | DB Diagnósticos do Brasil                                    | Instituto de Medicina Tropical da Universidade de São Paulo                                      | Samples: Nelson Gaburo Jr; Sequencing: Ingra Morales Claro, Jaqueline Goes de Jesus, Erika Regina Manuli, Flavia Cristina da Silva Sales, Thais de Moura Coletti, Camila Alves Maia da Silva, Mariana Severo Ramundo, Giulia Magalhaes Ferreira, Darlan da Silva Candido, Julien Theze, Nuno Faria, Ester Sabino                                                                                                                                                   |
| see above                                                                                                                                                                      |                                                              |                                                                                                  |                                                                                                                                                                                                                                                                                                                                                                                                                                                                    |
| EPI_ISL_510535                                                                                                                                                                 | Molecular Virology, Instituto Carlos Chagas / Fiocruz Paraná | Universidade Federal do Parana (UFPR)                                                            | Suzukawa,A., Tscha,M., Zanluca,C., Raboni,S., Duarte dos Santos,C.                                                                                                                                                                                                                                                                                                                                                                                                 |
| EPI_ISL_541340, EPI_ISL_541341, EPI_ISL_541342, EPI_ISL_541343, EPI_ISL_541344, EPI_ISL_541345, EPI_ISL_541346                                                                 | LACEN/PR                                                     | Laboratory of Respiratory Viruses and Measles, Oswaldo Cruz Institute, FIOCRUZ                   | Paola Resende, Luciana Appolinario, Fernando Motta, Anna Carolina Paixão, Ana Carolina Mendonça, Jonathan Lopes, Irina Riediger, Maria do Carmo Debur, Marilda Siqueira                                                                                                                                                                                                                                                                                            |
| EPI_ISL_672683, EPI_ISL_722135, EPI_ISL_722142, EPI_ISL_722149, EPI_ISL_722151                                                                                                 | DB Diagnosticos do Brasil                                    | Laboratório de Parasitologia Médica - Instituto de Medicina Tropical - Universidade de São Paulo | Brazil-UK Centre for Arbovirus Discovery Diagnosis Genomics and Epidemiology (CADDE) Genomic Network - Instituto de Medicina Tropical                                                                                                                                                                                                                                                                                                                              |

We gratefully acknowledge the following Authors from the Originating laboratories responsible for obtaining the specimens, as well as the Submitting laboratories where the genome data were generated and shared via GISAID, on which this research is based.

All Submitters of data may be contacted directly via [www.gisaid.org](http://www.gisaid.org)

| Accession ID                                                                                   | Originating Laboratory                                                     | Submitting Laboratory                                                                 | Authors                                                                                                                                                                                                                                                                                                                                                                                                                                                            |
|------------------------------------------------------------------------------------------------|----------------------------------------------------------------------------|---------------------------------------------------------------------------------------|--------------------------------------------------------------------------------------------------------------------------------------------------------------------------------------------------------------------------------------------------------------------------------------------------------------------------------------------------------------------------------------------------------------------------------------------------------------------|
| EPI_ISL_427305, EPI_ISL_427306                                                                 | LACEN-SC - Laboratorio Central de Santa Catarina                           | Instituto Oswaldo Cruz FIOCRUZ - Laboratory of Respiratory Viruses and Measles (LVRS) | Paola Resende, Fernando Motta, Luciana Appolinario, Sunando Roy, Aline Mattos, Milene Miranda, Cristiana Garcia, Braulia Caetano, Maria Ogrzewalska, Priscila Born, Jonathan Lopes, Marilda Siqueira                                                                                                                                                                                                                                                               |
| EPI_ISL_470652, EPI_ISL_470653, EPI_ISL_470654, EPI_ISL_470655                                 | Hermes Pardini                                                             | Bioinformatics Laboratory / LNCC                                                      | Alexandra Gerber, Ana Paula Guimarães, Luiz Gonzaga Paula de Almeida, Ronaldo da Silva Francisco Junior, Mariane Talon, Filipe Romero, Átila Duque Rossi, Terezinha Marta Pereira, working group UFRJ, Jaqueline Goes de Jesus, Ingra Morales Claro, Ester Cerdeira Sabino, Nuno Rodrigues Faria, CADDE-group, Laboratorio Hermes Pardini, Laboratorio Simile, working group UFMG, Amílcar Tanuri, Carolina Voloch, Renato Santana Aguiar e Ana Tereza Vasconcelos |
| EPI_ISL_476193, EPI_ISL_476209, EPI_ISL_476216                                                 | DB Diagnósticos do Brasil                                                  | Instituto de Medicina Tropical da Univesidade de São Paulo                            | Samples: Nelson Gaburo Jr; Sequencing: Ingra Morales Claro, Jaqueline Goes de Jesus, Erika Regina Manuli, Flavia Cristina da Silva Sales, Thais de Moura Coletti, Camila Alves Maia da Silva, Mariana Severo Ramundo, Giulia Magalhaes Ferreira, Darlan da Silva Candido, Julien Theze, Nuno Faria, Ester Sabino                                                                                                                                                   |
| EPI_ISL_476259                                                                                 | Hospital da Clínicas da Faculdade de Medicina da Universidade de São Paulo | Instituto de Medicina Tropical da Univesidade de São Paulo                            | Samples: Ingra Morales Claro, Erika Regina Manuli, Cecilia Salete Alencar, Carolina S. Lazar, Sílvia F. Costa; Sequencing: Ingra Morales Claro, Jaqueline Goes de Jesus, Erika Regina Manuli, Flavia Cristina da Silva Sales, Thais de Moura Coletti, Camila Alves Maia da Silva, Mariana Severo Ramundo, Giulia Magalhaes Ferreira, Darlan da Silva Candido, Julien Theze, Nuno Faria, Ester Sabino                                                               |
| EPI_ISL_476278, EPI_ISL_476292, EPI_ISL_476297, EPI_ISL_476317, EPI_ISL_476324, EPI_ISL_476354 | DB Diagnósticos do Brasil                                                  | Instituto de Medicina Tropical da Univesidade de São Paulo                            | Samples: Nelson Gaburo Jr; Sequencing: Ingra Morales Claro, Jaqueline Goes de Jesus, Erika Regina Manuli, Flavia Cristina da Silva Sales, Thais de Moura Coletti, Camila Alves Maia da Silva, Mariana Severo Ramundo, Giulia Magalhaes Ferreira, Darlan da Silva Candido, Julien Theze, Nuno Faria, Ester Sabino                                                                                                                                                   |
| EPI_ISL_541370, EPI_ISL_541371                                                                 | LACEN/SC                                                                   | Laboratory of Respiratory Viruses and Measles, Oswaldo Cruz Institute, FIOCRUZ        | Paola Resende, Luciana Appolinario, Fernando Motta, Anna Carolina Paixão, Ana Carolina Mendonça, Jonathan Lopes, Sandra Bianchini, Marilda Siqueira                                                                                                                                                                                                                                                                                                                |

We gratefully acknowledge the following Authors from the Originating laboratories responsible for obtaining the specimens, as well as the Submitting laboratories where the genome data were generated and shared via GISAIID, on which this research is based.

All Submitters of data may be contacted directly via [www.gisaid.org](http://www.gisaid.org)

| Accession ID                                                                                                                                                                                                                                                                                                                                                                                                                                                                                                                                                   | Originating Laboratory                                                                                    | Submitting Laboratory                                                              | Authors                                                                                                                                                                          |                                                                                                                                                |
|----------------------------------------------------------------------------------------------------------------------------------------------------------------------------------------------------------------------------------------------------------------------------------------------------------------------------------------------------------------------------------------------------------------------------------------------------------------------------------------------------------------------------------------------------------------|-----------------------------------------------------------------------------------------------------------|------------------------------------------------------------------------------------|----------------------------------------------------------------------------------------------------------------------------------------------------------------------------------|------------------------------------------------------------------------------------------------------------------------------------------------|
| EPI_ISL_426476, EPI_ISL_426477, EPI_ISL_426478                                                                                                                                                                                                                                                                                                                                                                                                                                                                                                                 | Microbial Genomics Laboratory, Institut Pasteur Montevideo                                                | Microbial Genomics Laboratory, Institut Pasteur Montevideo, Uruguay                | Cecilia Salazar, Florencia Díaz-Viraqué, Marianoel Pereira, Pilar Moreno, Gonzalo Moratorio, Gregorio Iraola                                                                     |                                                                                                                                                |
| EPI_ISL_426479, EPI_ISL_426480                                                                                                                                                                                                                                                                                                                                                                                                                                                                                                                                 | Microbial Genomics Laboratory, Institut Pasteur Montevideo                                                | Microbial Genomics Laboratory, Institut Pasteur Montevideo                         | Cecilia Salazar, Florencia Díaz-Viraqué, Marianoel Pereira, Pilar Moreno, Gonzalo Moratorio, Gregorio Iraola                                                                     |                                                                                                                                                |
| EPI_ISL_426481, EPI_ISL_426482                                                                                                                                                                                                                                                                                                                                                                                                                                                                                                                                 | Microbial Genomics Laboratory, Institut Pasteur Montevideo, Uruguay                                       | Microbial Genomics Laboratory, Institut Pasteur Montevideo                         | Cecilia Salazar, Florencia Díaz-Viraqué, Marianoel Pereira, Pilar Moreno, Gonzalo Moratorio, Gregorio Iraola                                                                     |                                                                                                                                                |
| EPI_ISL_426583                                                                                                                                                                                                                                                                                                                                                                                                                                                                                                                                                 | Microbial Genomics Laboratory, Institut Pasteur Montevideo                                                | Microbial Genomics Laboratory, Institut Pasteur Montevideo, Uruguay                | Cecilia Salazar, Florencia Díaz-Viraqué, Marianoel Pereira, Pilar Moreno, Gonzalo Moratorio, Gregorio Iraola                                                                     |                                                                                                                                                |
| EPI_ISL_426584                                                                                                                                                                                                                                                                                                                                                                                                                                                                                                                                                 | Microbial Genomics Laboratory, Institut Pasteur Montevideo, Uruguay                                       | Microbial Genomics Laboratory, Institut Pasteur Montevideo, Uruguay                | Cecilia Salazar, Florencia Díaz-Viraqué, Marianoel Pereira, Pilar Moreno, Gonzalo Moratorio, Gregorio Iraola                                                                     |                                                                                                                                                |
| EPI_ISL_429257                                                                                                                                                                                                                                                                                                                                                                                                                                                                                                                                                 | Microbial Genomics Laboratory, Institut Pasteur Montevideo                                                | Microbial Genomics Laboratory, Institut Pasteur Montevideo                         | Cecilia Salazar, Florencia Díaz-Viraqué, Marianoel Pereira, Pilar Moreno, Gonzalo Moratorio, Gregorio Iraola                                                                     |                                                                                                                                                |
| EPI_ISL_444493                                                                                                                                                                                                                                                                                                                                                                                                                                                                                                                                                 | Departamento de Laboratorios de Salud Publica (DLSP, Division Epidemiologia, Ministerio de Salud Publica) | Facultad de Ciencias (Sección Genética Evolutiva, Sección Virología).              | Panzer, Y., Delfraro, A., Ramos, N., Frabasil, S., Calleros, L., Techera, C., Grecco, S., Fuques, E., Goni, N., Coppola, L., Ramos, V., Chiparelli, H., Arbiza, J. and Perez, R. |                                                                                                                                                |
| EPI_ISL_457940, EPI_ISL_457941, EPI_ISL_457942, EPI_ISL_457943, EPI_ISL_457944, EPI_ISL_457945, EPI_ISL_457946, EPI_ISL_457947, EPI_ISL_457948, EPI_ISL_457949, EPI_ISL_457950, EPI_ISL_457951, EPI_ISL_457952, EPI_ISL_457953, EPI_ISL_457954, EPI_ISL_457955, EPI_ISL_457956, EPI_ISL_457957, EPI_ISL_457958, EPI_ISL_457959, EPI_ISL_457960, EPI_ISL_457961, EPI_ISL_457962, EPI_ISL_457963, EPI_ISL_457964, EPI_ISL_457965, EPI_ISL_457966, EPI_ISL_457967, EPI_ISL_457968, EPI_ISL_457969, EPI_ISL_457970, EPI_ISL_457971, EPI_ISL_457972, EPI_ISL_457973 | Laboratorio de Biología Molecular Asociación Española Primera en Salud                                    | Departments of Pathology and Medicine, New York University School of Medicine      | Maria Victoria Elizondo, Maria Noel Zubillaga, Gonzalo Manrique, Paul Zappile, Gael Westby, Matthew T Maurano, Christian Marier, Adriana Heguy                                   |                                                                                                                                                |
| EPI_ISL_480331, EPI_ISL_480332, EPI_ISL_480333, EPI_ISL_480334, EPI_ISL_480335, EPI_ISL_480336, EPI_ISL_480337, EPI_ISL_480338, EPI_ISL_480339, EPI_ISL_480340, EPI_ISL_480341, EPI_ISL_480342, EPI_ISL_480343, EPI_ISL_480344, EPI_ISL_480345, EPI_ISL_480346, EPI_ISL_480347, EPI_ISL_480348                                                                                                                                                                                                                                                                 | see above                                                                                                 | Microbial Genomics Laboratory, Institut Pasteur de Montevideo                      | Microbial Genomics Laboratory, Institut Pasteur de Montevideo                                                                                                                    | Cecilia Salazar, Marianoel Pereira, Ignacio Ferrés, Gonzalo Moratorio, Pilar Moreno, Gregorio Iraola                                           |
| EPI_ISL_480428, EPI_ISL_480429, EPI_ISL_480430, EPI_ISL_480431, EPI_ISL_480432, EPI_ISL_480433, EPI_ISL_480434, EPI_ISL_480435, EPI_ISL_480436, EPI_ISL_480437, EPI_ISL_480438                                                                                                                                                                                                                                                                                                                                                                                 | see above                                                                                                 | Laboratorio de Biología Molecular Asociación Española Primera en Salud             | Departments of Pathology and Medicine, New York University School of Medicine                                                                                                    | Maria Victoria Elizondo, Maria Noel Zubillaga, Gonzalo Manrique, Paul Zappile, Gael Westby, Matthew T Maurano, Christian Marier, Adriana Heguy |
| EPI_ISL_540430                                                                                                                                                                                                                                                                                                                                                                                                                                                                                                                                                 | Microbial Genomics Laboratory, Institut Pasteur de Montevideo, Montevideo, Uruguay                        | Microbial Genomics Laboratory, Institut Pasteur de Montevideo, Montevideo, Uruguay | Cecilia Salazar, Marianoel Pereira, Gonzalo Moratorio, Pilar Moreno, Gregorio Iraola                                                                                             |                                                                                                                                                |



We gratefully acknowledge the following Authors from the Originating laboratories responsible for obtaining the specimens, as well as the Submitting laboratories where the genome data were generated and shared via GISAID, on which this research is based.

All Submitters of data may be contacted directly via [www.gisaid.org](http://www.gisaid.org)

**Accession ID**  
EPI\_ISL\_677212

**Originating Laboratory**  
Virginia Division of Consolidated Laboratory Services

**Submitting Laboratory**  
Virginia Division of Consolidated Laboratory Services

**Authors**  
Virginia DCLS



We gratefully acknowledge the following Authors from the Originating laboratories responsible for obtaining the specimens, as well as the Submitting laboratories where the genome data were generated and shared via GISAID, on which this research is based.

All Submitters of data may be contacted directly via [www.gisaid.org](http://www.gisaid.org)

**Accession ID**

EPI\_ISL\_723494

**Originating Laboratory**

Virginia Division of Consolidated Laboratory Services  
(DCLS)

**Submitting Laboratory**

Virginia Division of Consolidated Laboratory Services  
(DCLS)

**Authors**

Virginia DCLS



We gratefully acknowledge the following Authors from the Originating laboratories responsible for obtaining the specimens, as well as the Submitting laboratories where the genome data were generated and shared via GISAID, on which this research is based.

All Submitters of data may be contacted directly via [www.gisaid.org](http://www.gisaid.org)

**Accession ID**  
EPI\_ISL\_683969

**Originating Laboratory**  
DOHMH Morrisania

**Submitting Laboratory**  
New York City Public Health Laboratory

**Authors**  
Jade Wang, et al.



We gratefully acknowledge the following Authors from the Originating laboratories responsible for obtaining the specimens, as well as the Submitting laboratories where the genome data were generated and shared via GISAID, on which this research is based.

All Submitters of data may be contacted directly via [www.gisaid.org](http://www.gisaid.org)

**Accession ID**

EPI\_ISL\_668335

**Originating Laboratory**

Lighthouse Lab in Glasgow

**Submitting Laboratory**

Wellcome Sanger Institute for the COVID-19 Genomics  
UK (COG-UK) Consortium

**Authors**

Harper VanSteenhouse, Yumi Kasai, David Gray, Carol Clugston, Anna Dominiczak and Alex Alderton, Roberto Amato, Sonia Goncalves, Ewan Harrison, David K. Jackson, Ian Johnston, Dominic Kwiatkowski, Cordelia Langford, John Sillitoe on behalf of the Wellcome Sanger Institute COVID-19 Surveillance Team (<http://www.sanger.ac.uk/covid-team>)



We gratefully acknowledge the following Authors from the Originating laboratories responsible for obtaining the specimens, as well as the Submitting laboratories where the genome data were generated and shared via GISAID, on which this research is based.

All Submitters of data may be contacted directly via [www.gisaid.org](http://www.gisaid.org)

**Accession ID**

EPI\_ISL\_729285

**Originating Laboratory**

Toronto Invasive Bacterial Diseases Network

**Submitting Laboratory**

McMaster University

**Authors**

Allison McGeer, Patryk Aftanas, Hooman Derakhshani, Angel Li, Kuganya Nirmalarajah, Emily Panousis, Ahmed Draia, Jalees Nasir, Michael Surette, Samira Mubareka, Andrew G. McArthur



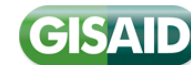

We gratefully acknowledge the following Authors from the Originating laboratories responsible for obtaining the specimens, as well as the Submitting laboratories where the genome data were generated and shared via GISAID, on which this research is based.

All Submitters of data may be contacted directly via [www.gisaid.org](http://www.gisaid.org)

**Accession ID**

EPI\_ISL\_729310

**Originating Laboratory**

Toronto Invasive Bacterial Diseases Network

**Submitting Laboratory**

McMaster University

**Authors**

Allison McGeer, Patryk Aftanas, Hooman Derakhshani, Angel Li, Kuganya Nirmalarajah, Emily Panousis, Ahmed Draia, Jalees Nasir, Michael Surette, Samira Mubareka, Andrew G. McArthur



We gratefully acknowledge the following Authors from the Originating laboratories responsible for obtaining the specimens, as well as the Submitting laboratories where the genome data were generated and shared via GISAID, on which this research is based.

All Submitters of data may be contacted directly via [www.gisaid.org](http://www.gisaid.org)

**Accession ID**

EPI\_ISL\_736906

**Originating Laboratory**

Pathogen Genomics Center, National Institute of  
Infectious Diseases

**Submitting Laboratory**

Pathogen Genomics Center, National Institute of  
Infectious Diseases

**Authors**

Tsuyoshi Sekizuka, Kentaro Itokawa, Rina Tanaka, Masanori Hashino, Makoto Kuroda

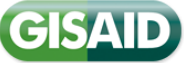

We gratefully acknowledge the following Authors from the Originating laboratories responsible for obtaining the specimens, as well as the Submitting laboratories where the genome data were generated and shared via GISAID, on which this research is based.

All Submitters of data may be contacted directly via [www.gisaid.org](http://www.gisaid.org)

**Accession ID**  
EPI\_ISL\_731736

**Originating Laboratory**  
Lighthouse Lab in Alderley Park

**Submitting Laboratory**  
Wellcome Sanger Institute for the COVID-19 Genomics UK (COG-UK) Consortium

**Authors**  
Jacquelyn Wynn, Mairead Hyland, The Lighthouse Lab in Alderley Park and Alex Alderton, Roberto Amato, Sonia Goncalves, Ewan Harrison, David K. Jackson, Ian Johnston, Dominic Kwiatkowski, Cordelia Langford, John Sillitoe on behalf of the Wellcome Sanger Institute COVID-19 Surveillance Team



We gratefully acknowledge the following Authors from the Originating laboratories responsible for obtaining the specimens, as well as the Submitting laboratories where the genome data were generated and shared via GISAID, on which this research is based.

All Submitters of data may be contacted directly via [www.gisaid.org](http://www.gisaid.org)

**Accession ID**  
EPI\_ISL\_718344

**Originating Laboratory**  
Lighthouse Lab in Cambridge

**Submitting Laboratory**  
Wellcome Sanger Institute for the COVID-19 Genomics  
UK (COG-UK) Consortium

**Authors**  
Rob Howes, The Lighthouse Lab in Cambridge and Alex Alderton, Roberto Amato, Sonia Goncalves, Ewan Harrison, David K. Jackson, Ian Johnston,  
Dominic Kwiatkowski, Cordelia Langford, John Sillitoe on behalf of the Wellcome Sanger Institute COVID-19 Surveillance Team



We gratefully acknowledge the following Authors from the Originating laboratories responsible for obtaining the specimens, as well as the Submitting laboratories where the genome data were generated and shared via GISAID, on which this research is based.

All Submitters of data may be contacted directly via [www.gisaid.org](http://www.gisaid.org)

**Accession ID**

EPI\_ISL\_741517

**Originating Laboratory**

Quadram Institute Bioscience

**Submitting Laboratory**

COVID-19 Genomics UK (COG-UK) Consortium

**Authors**

Dave J. Baker, Gemma L. Kay, Alp Aydin, Thanh Le-Viet, Steven Rudder, Ana P. Tedim, Anastasia Kolyva, Maria Diaz, Leonardo de Oliveira Martins, Nabil-Fareed AliKhan, Lizzie Meadows, Rachael Stanley, Ngozi Elumogo, Muhammed Yasir, Nicholas M. Thomson, Alexander J Trotter, Rachel Gilroy, Samuel Bloomfield, Claire Stuart, Andrew Bell, Reenesh Prakash, Samir Dervisevic, Alison E. Mather, John Wain, Mark Webber, Andrew J. Page, Justin O'Grady



We gratefully acknowledge the following Authors from the Originating laboratories responsible for obtaining the specimens, as well as the Submitting laboratories where the genome data were generated and shared via GISAID, on which this research is based.

All Submitters of data may be contacted directly via [www.gisaid.org](http://www.gisaid.org)

**Accession ID**

EPI\_ISL\_677211

**Originating Laboratory**

Virginia Division of Consolidated Laboratory Services

**Submitting Laboratory**

Virginia Division of Consolidated Laboratory Services

**Authors**

Virginia DCLS

We gratefully acknowledge the following Authors from the Originating laboratories responsible for obtaining the specimens, as well as the Submitting laboratories where the genome data were generated and shared via GISAID, on which this research is based.

All Submitters of data may be contacted directly via [www.gisaid.org](http://www.gisaid.org)

| Accession ID                                                                                                                   | Originating Laboratory                                                                                       | Submitting Laboratory                                                                 | Authors                                                                                                                                                                                                                                                                                                                                                                                                                                                            |
|--------------------------------------------------------------------------------------------------------------------------------|--------------------------------------------------------------------------------------------------------------|---------------------------------------------------------------------------------------|--------------------------------------------------------------------------------------------------------------------------------------------------------------------------------------------------------------------------------------------------------------------------------------------------------------------------------------------------------------------------------------------------------------------------------------------------------------------|
| EPI_ISL_416036                                                                                                                 | National Influenza Center - Instituto Adolfo Lutz                                                            | Instituto Adolfo Lutz, Interdisciplinary Procedures Center, Strategic Laboratory      | Claudio Tavares Sacchi, Claudia Regina Gonçalves, Carlos Henrique Camargo, Erica Valessa Ramos Gomes, Fabiana Cristina Pereira dos Santos, Daniela Bernardes Borges da Silva, Simone Guadagnucci Morillo, Adriano Abbud, Adriana Bugno, Maria do Carmo Sampaio Tavares Timenetsky, Terezinha Maria de Paiva                                                                                                                                                        |
| EPI_ISL_427292                                                                                                                 | LACEN-AL - Laboratorio Central de Alagoas                                                                    | Instituto Oswaldo Cruz FIOCRUZ - Laboratory of Respiratory Viruses and Measles (LVRS) | Paola Resende, Fernando Motta, Luciana Appolinario, Sunando Roy, Aline Mattos, Milene Miranda, Cristiana Garcia, Braulia Caetano, Maria Ogrzewalska, Priscila Born, Jonathan Lopes, Marilda Siqueira                                                                                                                                                                                                                                                               |
| EPI_ISL_429701                                                                                                                 | Central Public Health Laboratory/Octávio Magalhães Institute (IOM) from the Ezequiel Dias Foundation (FUNED) | Instituto Octávio Magalhães / Fundação Ezequiel Dias (IOM/Funed)                      | Talita Adelino, Joilson Xavier, Marta Giovanetti, Vagner Fonseca, Marcos Vinicius Silva, Luiz Carlos Junior Alcantara, Marluce Aparecida Assunção Oliveira                                                                                                                                                                                                                                                                                                         |
| EPI_ISL_431180, EPI_ISL_431240                                                                                                 | Fujian Center for Disease Control and Prevention                                                             | Fujian Center for Disease Control and Prevention                                      | Lin Qi, Huang Zhimiao, Zhang Yanhua, Weng Yuwei                                                                                                                                                                                                                                                                                                                                                                                                                    |
| EPI_ISL_445380                                                                                                                 | Ramathibodi Hospital                                                                                         | COVID-19 Network Investigations (CONI) Alliance                                       | Elizabeth Batty, Wasun Chantraita, Thanat Chookajorn, Stefan Fernandez, Angkana Huang, Anthony R. Jones, Khajohn Joonsalak, Chonticha Klungtong, Theerarat Kochakarn, Namfon Kotanan, Krittikorn Kumpornsin, Wudtichai Manasatienkij, Bhakbhoom Panthan, Ekawat Pasomsub, Kingkan Rakmanee, Insee Sensorn, Janjira Thaipadungpanit, Arporn Wangiwatsin, Treewat Watthanachockchai                                                                                  |
| EPI_ISL_456088                                                                                                                 | LACEN RJ - Laboratório Central de Saúde Pública Noel Nutels                                                  | Laboratory of Respiratory Viruses and Measles, Oswaldo Cruz Institute, FIOCRUZ        | Paola Resende, Luciana Appolinario, Fernando Motta, Aline Mattos, Milene Miranda, Cristiana Garcia, Braulia Caetano, Maria Ogrzewalska, Jonathan Lopes, Marilda Siqueira                                                                                                                                                                                                                                                                                           |
| EPI_ISL_456869                                                                                                                 | West of Scotland Specialist Virology Centre, NHSGGC / MRC-University of Glasgow Centre for Virus Research    | COVID-19 Genomics UK (COG-UK) Consortium                                              | Ana da Silva Filipe, Natasha Johnson, Kathy Smollett, Daniel Mair, Stephen Carmichael, Lily Tong, Jenna Nichols, Elihu Aranday-Cortes, Kirstyn Brunker, Yasmin Parr, Kyriaki Nomikou; Sarah McDonald, Marc Niebel, Patawee Asamaphan; Richard Orton, Joseph Hughes, Sreenu Vattipally, David L Robertson; Alasdair MacLean, Rory Gunson; Kathy Li, Natasha Jesudason, Rajiv Shah, James Shepherd, Antonia Ho, Emma Thomson                                         |
| EPI_ISL_458140, EPI_ISL_458141, EPI_ISL_458146, EPI_ISL_458147                                                                 | Evandro Chagas Institute                                                                                     | Evandro Chagas Institute                                                              | Santos, M.C.; Silva, A.M.; Junior, W.D.C.; Barbagelata, L.S.; Ferreira, J.A.; Sousa, E.M.A.; da Silva, P.S.; Resque, H.R.; Martins, L.C.; Sousa Junior, E.C.; Viana, G.M.R                                                                                                                                                                                                                                                                                         |
| EPI_ISL_461606, EPI_ISL_461678                                                                                                 | West of Scotland Specialist Virology Centre, NHSGGC / MRC-University of Glasgow Centre for Virus Research    | COVID-19 Genomics UK (COG-UK) Consortium                                              | Ana da Silva Filipe, Natasha Johnson, Kathy Smollett, Daniel Mair, Stephen Carmichael, Lily Tong, Jenna Nichols, Elihu Aranday-Cortes, Kirstyn Brunker, Yasmin Parr, Kyriaki Nomikou; Sarah McDonald, Marc Niebel, Patawee Asamaphan; Richard Orton, Joseph Hughes, Sreenu Vattipally, David L Robertson; Alasdair MacLean, Rory Gunson; Kathy Li, Natasha Jesudason, Rajiv Shah, James Shepherd, Antonia Ho, Emma Thomson                                         |
| EPI_ISL_467356, EPI_ISL_467359, EPI_ISL_467366                                                                                 | Laboratory of Respiratory Viruses and Measles, Oswaldo Cruz Institute, FIOCRUZ                               | Laboratory of Respiratory Viruses and Measles, Oswaldo Cruz Institute, FIOCRUZ        | Paola Resende, Luciana Appolinario, Fernando Motta, Anna Carolina Paixão, Ana Carolina Mendonça, Aline Mattos, Milene Miranda, Cristiana Garcia, Braulia Caetano, Maria Ogrzewalska, Jonathan Lopes, Marilda Siqueira                                                                                                                                                                                                                                              |
| EPI_ISL_468311, EPI_ISL_468312                                                                                                 | Hospital Municipal Dr Ignacio Proenca de Gouvea                                                              | Instituto Adolfo Lutz, Interdisciplinary Procedures Center, Strategic Laboratory      | Claudio Tavares Sacchi, Claudia Regina Gonçalves, Erica Valessa Ramos Gomes                                                                                                                                                                                                                                                                                                                                                                                        |
| EPI_ISL_468313                                                                                                                 | Vigilancia Epidemiologica de São Bernardo do Campo                                                           | Instituto Adolfo Lutz, Interdisciplinary Procedures Center, Strategic Laboratory      | Claudio Tavares Sacchi, Claudia Regina Gonçalves, Erica Valessa Ramos Gomes                                                                                                                                                                                                                                                                                                                                                                                        |
| EPI_ISL_468314                                                                                                                 | CTA Centro de Testagem e Aconselhamento                                                                      | Instituto Adolfo Lutz, Interdisciplinary Procedures Center, Strategic Laboratory      | Claudio Tavares Sacchi, Claudia Regina Gonçalves, Erica Valessa Ramos Gomes                                                                                                                                                                                                                                                                                                                                                                                        |
| EPI_ISL_468316                                                                                                                 | UPA Vila Assis                                                                                               | Instituto Adolfo Lutz, Interdisciplinary Procedures Center, Strategic Laboratory      | Claudio Tavares Sacchi, Claudia Regina Gonçalves, Erica Valessa Ramos Gomes                                                                                                                                                                                                                                                                                                                                                                                        |
| EPI_ISL_468318, EPI_ISL_468321                                                                                                 | Hospital Universitario da USP                                                                                | Instituto Adolfo Lutz, Interdisciplinary Procedures Center, Strategic Laboratory      | Claudio Tavares Sacchi, Claudia Regina Gonçalves, Erica Valessa Ramos Gomes                                                                                                                                                                                                                                                                                                                                                                                        |
| EPI_ISL_470600, EPI_ISL_470602, EPI_ISL_470604, EPI_ISL_470605, EPI_ISL_470607, EPI_ISL_470608, EPI_ISL_470610, EPI_ISL_470612 | Hermes Pardini                                                                                               | Bioinformatics Laboratory / LNCC                                                      | Alexandra Gerber, Ana Paula Guimarães, Luiz Gonzaga Paula de Almeida, Ronaldo da Silva Francisco Junior, Mariane Talon, Filipe Romero, Átila Duque Rossi, Terezinha Marta Pereira, working group UFRJ, Jaqueline Goes de Jesus, Ingra Morales Claro, Ester Cerdeira Sabino, Nuno Rodrigues Faria, CADDE-group, Laboratorio Hermes Pardini, Laboratorio Simile, working group UFMG, Amilcar Tanuri, Carolina Voloch, Renato Santana Aguiar e Ana Tereza Vasconcelos |
| EPI_ISL_470638                                                                                                                 | Laboratorio de Virologia Molecular / UFRJ                                                                    | Bioinformatics Laboratory / LNCC                                                      | Alexandra Gerber, Ana Paula Guimarães, Luiz Gonzaga Paula de Almeida, Ronaldo da Silva Francisco Junior, Mariane Talon, Filipe Romero, Átila Duque Rossi, Terezinha Marta Pereira, working group UFRJ, Jaqueline Goes de Jesus, Ingra Morales Claro, Ester Cerdeira Sabino, Nuno Rodrigues Faria, CADDE-group, Laboratorio Hermes Pardini, Laboratorio Simile, working group UFMG, Amilcar Tanuri, Carolina Voloch, Renato Santana Aguiar e Ana Tereza Vasconcelos |
| EPI_ISL_470651, EPI_ISL_470653, EPI_ISL_470654                                                                                 | Hermes Pardini                                                                                               | Bioinformatics Laboratory / LNCC                                                      | Alexandra Gerber, Ana Paula Guimarães, Luiz Gonzaga Paula de Almeida, Ronaldo da Silva Francisco Junior, Mariane Talon, Filipe Romero, Átila Duque Rossi, Terezinha Marta Pereira, working group UFRJ, Jaqueline Goes de Jesus, Ingra Morales Claro, Ester Cerdeira Sabino, Nuno Rodrigues Faria, CADDE-group, Laboratorio Hermes Pardini, Laboratorio Simile, working group UFMG, Amilcar Tanuri, Carolina Voloch, Renato Santana Aguiar e Ana Tereza Vasconcelos |
| EPI_ISL_471541                                                                                                                 | Hospital Geral Santa Marcelina                                                                               | Instituto Adolfo Lutz, Interdisciplinary Procedures Center, Strategic Laboratory      | Claudio Tavares Sacchi, Claudia Regina Gonçalves, Erica Valessa Ramos Gomes                                                                                                                                                                                                                                                                                                                                                                                        |
| EPI_ISL_471545                                                                                                                 | Hospital Sao Paulo de Ensino da Unifesp                                                                      | Instituto Adolfo Lutz, Interdisciplinary Procedures Center, Strategic Laboratory      | Claudio Tavares Sacchi, Claudia Regina Gonçalves, Erica Valessa Ramos Gomes                                                                                                                                                                                                                                                                                                                                                                                        |
| EPI_ISL_471546                                                                                                                 | AMA DR Jose Soares Hungria                                                                                   | Instituto Adolfo Lutz, Interdisciplinary Procedures Center, Strategic Laboratory      | Claudio Tavares Sacchi, Claudia Regina Gonçalves, Erica Valessa Ramos Gomes                                                                                                                                                                                                                                                                                                                                                                                        |
| EPI_ISL_471549                                                                                                                 | Hospital Municipal Carmen Prudente                                                                           | Instituto Adolfo Lutz, Interdisciplinary Procedures Center, Strategic Laboratory      | Claudio Tavares Sacchi, Claudia Regina Gonçalves, Erica Valessa Ramos Gomes                                                                                                                                                                                                                                                                                                                                                                                        |
| EPI_ISL_471552                                                                                                                 | Hospital Sancta Maggiore                                                                                     | Instituto Adolfo Lutz, Interdisciplinary Procedures Center, Strategic Laboratory      | Claudio Tavares Sacchi, Claudia Regina Gonçalves, Erica Valessa Ramos Gomes                                                                                                                                                                                                                                                                                                                                                                                        |
| EPI_ISL_471562, EPI_ISL_471582                                                                                                 | Hosp. Municipal Prof. Dr. Alípio Corrêa Netto                                                                | Instituto Adolfo Lutz, Interdisciplinary Procedures Center, Strategic Laboratory      | Claudio Tavares Sacchi, Claudia Regina Gonçalves, Erica Valessa Ramos Gomes                                                                                                                                                                                                                                                                                                                                                                                        |
| EPI_ISL_471647                                                                                                                 | Hospital Municipal de Barueri Dr. Francisco Moran                                                            | Instituto Adolfo Lutz, Interdisciplinary Procedures Center, Strategic Laboratory      | Claudio Tavares Sacchi, Claudia Regina Gonçalves, Erica Valessa Ramos Gomes                                                                                                                                                                                                                                                                                                                                                                                        |

|                                                                                                                                                                                                                                                                                                                                                                                                                                                                                                                                                                                                                                                                                                |                                                                                                                                                                                                 |                                                                                                                                                     |                                                                                                                                                                                                                                                                                                                                                                                                                                                                                                                                                                                                                                                                                                                                                                                                                                                             |
|------------------------------------------------------------------------------------------------------------------------------------------------------------------------------------------------------------------------------------------------------------------------------------------------------------------------------------------------------------------------------------------------------------------------------------------------------------------------------------------------------------------------------------------------------------------------------------------------------------------------------------------------------------------------------------------------|-------------------------------------------------------------------------------------------------------------------------------------------------------------------------------------------------|-----------------------------------------------------------------------------------------------------------------------------------------------------|-------------------------------------------------------------------------------------------------------------------------------------------------------------------------------------------------------------------------------------------------------------------------------------------------------------------------------------------------------------------------------------------------------------------------------------------------------------------------------------------------------------------------------------------------------------------------------------------------------------------------------------------------------------------------------------------------------------------------------------------------------------------------------------------------------------------------------------------------------------|
| EPI_ISL_471648                                                                                                                                                                                                                                                                                                                                                                                                                                                                                                                                                                                                                                                                                 | UBS e Pronto Socorro Jd. Jacira                                                                                                                                                                 | Instituto Adolfo Lutz, Interdisciplinary Procedures Center, Strategic Laboratory                                                                    | Claudio Tavares Sacchi, Claudia Regina Gonçalves, Erica Valessa Ramos Gomes                                                                                                                                                                                                                                                                                                                                                                                                                                                                                                                                                                                                                                                                                                                                                                                 |
| EPI_ISL_473651                                                                                                                                                                                                                                                                                                                                                                                                                                                                                                                                                                                                                                                                                 | West of Scotland Specialist Virology Centre, NHSGGC / MRC-University of Glasgow Centre for Virus Research                                                                                       | COVID-19 Genomics UK (COG-UK) Consortium                                                                                                            | Ana da Silva Filipe, Natasha Johnson, Kathy Smollett, Daniel Mair, Stephen Carmichael, Lily Tong, Jenna Nichols, Elihu Aranday-Cortes, Kirstyn Brunker, Yasmin Parr, Alice Broos, Kyriaki Nomikou; Sarah McDonald, Marc Niebel, Patawee Asamaphan; Richard Orton, Joseph Hughes, Sreenu Vattipally, David L Robertson; Alasdair MacLean, Rory Gunson; Kathy Li, Natasha Jesudason, Rajiv Shah, James Shepherd, Antonia Ho, Emma Thomson                                                                                                                                                                                                                                                                                                                                                                                                                     |
| EPI_ISL_476152, EPI_ISL_476154, EPI_ISL_476156, EPI_ISL_476157, EPI_ISL_476159, EPI_ISL_476161, EPI_ISL_476162, EPI_ISL_476163, EPI_ISL_476165, EPI_ISL_476166, EPI_ISL_476167, EPI_ISL_476169                                                                                                                                                                                                                                                                                                                                                                                                                                                                                                 | Laboratório de Patologia Clínica - UNICAMP                                                                                                                                                      | Laboratório de Estudos de Vírus Emergentes - UNICAMP                                                                                                | José Luiz Proença-Modena, Magnun Nueldo Nunes dos Santos, Angelica Schreiber, Julia Forato, Camila Simeoni, Marcilio Jorge Fumagalli, Mariene Ribeiro Amorim, Darlan da Silva Candido, Nuno Rodrigues Faria, Julien Theze, Luiz Gonzaga, Jaqueline Goes Jesus e William Marciel de Souza                                                                                                                                                                                                                                                                                                                                                                                                                                                                                                                                                                    |
| EPI_ISL_476181, EPI_ISL_476187                                                                                                                                                                                                                                                                                                                                                                                                                                                                                                                                                                                                                                                                 | DB Diagnósticos do Brasil                                                                                                                                                                       | Instituto de Medicina Tropical da Universidade de São Paulo                                                                                         | Samples: Nelson Gaburo Jr; Sequencing: Ingra Morales Claro, Jaqueline Goes de Jesus, Erika Regina Manuli, Flavia Cristina da Silva Sales, Thais de Moura Coletti, Camila Alves Maia da Silva, Mariana Severo Ramundo, Giula Magalhaes Ferreira, Darlan da Silva Candido, Julien Theze, Nuno Faria, Ester Sabino                                                                                                                                                                                                                                                                                                                                                                                                                                                                                                                                             |
| EPI_ISL_476203, EPI_ISL_476205, EPI_ISL_476206, EPI_ISL_476207, EPI_ISL_476208, EPI_ISL_476222, EPI_ISL_476223, EPI_ISL_476237, EPI_ISL_476239, EPI_ISL_476243, EPI_ISL_476244, EPI_ISL_476252, EPI_ISL_476253, EPI_ISL_476255, EPI_ISL_476257, EPI_ISL_476259, EPI_ISL_476260, EPI_ISL_476261, EPI_ISL_476262, EPI_ISL_476266, EPI_ISL_476268, EPI_ISL_476270, EPI_ISL_476272, EPI_ISL_476277                                                                                                                                                                                                                                                                                                 | Hospital da Clínicas da Faculdade de Medicina da Universidade de São Paulo                                                                                                                      | Instituto de Medicina Tropical da Universidade de São Paulo                                                                                         | Samples: Ingra Morales Claro, Erika Regina Manuli, Cecilia Salette Alencar, Carolina S. Lazar, Silvia F. Costa; Sequencing: Ingra Morales Claro, Jaqueline Goes de Jesus, Erika Regina Manuli, Flavia Cristina da Silva Sales, Thais de Moura Coletti, Camila Alves Maia da Silva, Mariana Severo Ramundo, Giula Magalhaes Ferreira, Darlan da Silva Candido, Julien Theze, Nuno Faria, Ester Sabino                                                                                                                                                                                                                                                                                                                                                                                                                                                        |
| EPI_ISL_476279, EPI_ISL_476282, EPI_ISL_476287, EPI_ISL_476293, EPI_ISL_476294, EPI_ISL_476312, EPI_ISL_476313, EPI_ISL_476314, EPI_ISL_476318, EPI_ISL_476321, EPI_ISL_476322, EPI_ISL_476323, EPI_ISL_476325                                                                                                                                                                                                                                                                                                                                                                                                                                                                                 | DB Diagnósticos do Brasil                                                                                                                                                                       | Instituto de Medicina Tropical da Universidade de São Paulo                                                                                         | Samples: Nelson Gaburo Jr; Sequencing: Ingra Morales Claro, Jaqueline Goes de Jesus, Erika Regina Manuli, Flavia Cristina da Silva Sales, Thais de Moura Coletti, Camila Alves Maia da Silva, Mariana Severo Ramundo, Giula Magalhaes Ferreira, Darlan da Silva Candido, Julien Theze, Nuno Faria, Ester Sabino                                                                                                                                                                                                                                                                                                                                                                                                                                                                                                                                             |
| EPI_ISL_476337, EPI_ISL_476338, EPI_ISL_476340, EPI_ISL_476341, EPI_ISL_476343, EPI_ISL_476345, EPI_ISL_476346, EPI_ISL_476347, EPI_ISL_476349                                                                                                                                                                                                                                                                                                                                                                                                                                                                                                                                                 | Laboratório de Patologia Clínica - UNICAMP                                                                                                                                                      | Laboratório de Estudos de Vírus Emergentes - UNICAMP                                                                                                | José Luiz Proença-Modena, Magnun Nueldo Nunes dos Santos, Angelica Schreiber, Julia Forato, Camila Simeoni, Marcilio Jorge Fumagalli, Mariene Ribeiro Amorim, Darlan da Silva Candido, Nuno Rodrigues Faria, Julien Theze, Luiz Gonzaga, Jaqueline Goes Jesus e William Marciel de Souza                                                                                                                                                                                                                                                                                                                                                                                                                                                                                                                                                                    |
| EPI_ISL_476353, EPI_ISL_476354, EPI_ISL_476361, EPI_ISL_476363, EPI_ISL_476364, EPI_ISL_476366, EPI_ISL_476367, EPI_ISL_476370                                                                                                                                                                                                                                                                                                                                                                                                                                                                                                                                                                 | DB Diagnósticos do Brasil                                                                                                                                                                       | Instituto de Medicina Tropical da Universidade de São Paulo                                                                                         | Samples: Nelson Gaburo Jr; Sequencing: Ingra Morales Claro, Jaqueline Goes de Jesus, Erika Regina Manuli, Flavia Cristina da Silva Sales, Thais de Moura Coletti, Camila Alves Maia da Silva, Mariana Severo Ramundo, Giula Magalhaes Ferreira, Darlan da Silva Candido, Julien Theze, Nuno Faria, Ester Sabino                                                                                                                                                                                                                                                                                                                                                                                                                                                                                                                                             |
| EPI_ISL_476372, EPI_ISL_476373, EPI_ISL_476375, EPI_ISL_476376, EPI_ISL_476379, EPI_ISL_476380, EPI_ISL_476382, EPI_ISL_476384, EPI_ISL_476386                                                                                                                                                                                                                                                                                                                                                                                                                                                                                                                                                 | Hospital da Clínicas da Faculdade de Medicina da Universidade de São Paulo                                                                                                                      | Instituto de Medicina Tropical da Universidade de São Paulo                                                                                         | Samples: Ingra Morales Claro, Erika Regina Manuli, Cecilia Salette Alencar, Carolina S. Lazar, Silvia F. Costa; Sequencing: Ingra Morales Claro, Jaqueline Goes de Jesus, Erika Regina Manuli, Flavia Cristina da Silva Sales, Thais de Moura Coletti, Camila Alves Maia da Silva, Mariana Severo Ramundo, Giula Magalhaes Ferreira, Darlan da Silva Candido, Julien Theze, Nuno Faria, Ester Sabino                                                                                                                                                                                                                                                                                                                                                                                                                                                        |
| EPI_ISL_476387, EPI_ISL_476388, EPI_ISL_476389, EPI_ISL_476390, EPI_ISL_476391, EPI_ISL_476393, EPI_ISL_476394, EPI_ISL_476395, EPI_ISL_476396, EPI_ISL_476397, EPI_ISL_476398, EPI_ISL_476399, EPI_ISL_476400, EPI_ISL_476401, EPI_ISL_476408, EPI_ISL_476410, EPI_ISL_476411, EPI_ISL_476413, EPI_ISL_476414, EPI_ISL_476415, EPI_ISL_476416, EPI_ISL_476417, EPI_ISL_476418, EPI_ISL_476419, EPI_ISL_476421, EPI_ISL_476423                                                                                                                                                                                                                                                                 | Laboratório de Patologia Clínica - UNICAMP                                                                                                                                                      | Laboratório de Estudos de Vírus Emergentes - UNICAMP                                                                                                | José Luiz Proença-Modena, Magnun Nueldo Nunes dos Santos, Angelica Schreiber, Julia Forato, Camila Simeoni, Marcilio Jorge Fumagalli, Mariene Ribeiro Amorim, Darlan da Silva Candido, Nuno Rodrigues Faria, Julien Theze, Luiz Gonzaga, Jaqueline Goes Jesus e William Marciel de Souza                                                                                                                                                                                                                                                                                                                                                                                                                                                                                                                                                                    |
| EPI_ISL_476428, EPI_ISL_476430, EPI_ISL_476431, EPI_ISL_476433, EPI_ISL_476434, EPI_ISL_476436, EPI_ISL_476438, EPI_ISL_476440, EPI_ISL_476441, EPI_ISL_476442, EPI_ISL_476445, EPI_ISL_476446, EPI_ISL_476447, EPI_ISL_476448, EPI_ISL_476451, EPI_ISL_476452, EPI_ISL_476454, EPI_ISL_476455, EPI_ISL_476456, EPI_ISL_476457, EPI_ISL_476458, EPI_ISL_476460, EPI_ISL_476461, EPI_ISL_476462, EPI_ISL_476463, EPI_ISL_476464, EPI_ISL_476465, EPI_ISL_476466, EPI_ISL_476467, EPI_ISL_476468, EPI_ISL_476469, EPI_ISL_476471, EPI_ISL_476473, EPI_ISL_476475, EPI_ISL_476476, EPI_ISL_476477, EPI_ISL_476479, EPI_ISL_476480, EPI_ISL_476481, EPI_ISL_476482, EPI_ISL_476488, EPI_ISL_476489 | Hospital da Clínicas da Faculdade de Medicina da Universidade de São Paulo                                                                                                                      | Instituto de Medicina Tropical da Universidade de São Paulo                                                                                         | Samples: Ingra Morales Claro, Erika Regina Manuli, Cecilia Salette Alencar, Carolina S. Lazar, Silvia F. Costa; Sequencing: Ingra Morales Claro, Jaqueline Goes de Jesus, Erika Regina Manuli, Flavia Cristina da Silva Sales, Thais de Moura Coletti, Camila Alves Maia da Silva, Mariana Severo Ramundo, Giula Magalhaes Ferreira, Darlan da Silva Candido, Julien Theze, Nuno Faria, Ester Sabino                                                                                                                                                                                                                                                                                                                                                                                                                                                        |
| EPI_ISL_478094, EPI_ISL_478111                                                                                                                                                                                                                                                                                                                                                                                                                                                                                                                                                                                                                                                                 | West of Scotland Specialist Virology Centre, NHSGGC / MRC-University of Glasgow Centre for Virus Research                                                                                       | COVID-19 Genomics UK (COG-UK) Consortium                                                                                                            | Ana da Silva Filipe, Natasha Johnson, Kathy Smollett, Daniel Mair, Stephen Carmichael, Lily Tong, Jenna Nichols, Elihu Aranday-Cortes, Kirstyn Brunker, Yasmin Parr, Alice Broos, Kyriaki Nomikou; Sarah McDonald, Marc Niebel, Patawee Asamaphan; Richard Orton, Joseph Hughes, Sreenu Vattipally, David L Robertson; Alasdair MacLean, Rory Gunson; Kathy Li, Natasha Jesudason, Rajiv Shah, James Shepherd, Antonia Ho, Emma Thomson                                                                                                                                                                                                                                                                                                                                                                                                                     |
| EPI_ISL_478249                                                                                                                                                                                                                                                                                                                                                                                                                                                                                                                                                                                                                                                                                 | Virology Department, Royal Infirmary of Edinburgh, NHS Lothian / School of Biological Sciences, University of Edinburgh / Institute of Genetics and Molecular Medicine, University of Edinburgh | COVID-19 Genomics UK (COG-UK) Consortium                                                                                                            | McHugh M, Dewar R, Rooke S, Gallagher M, Balcaza C, O'Toole Á, Scher E, Hill V, McCrone JT, Colquhoun R, Yu X, Jackson B, Rambaut A, Williams TC, Templeton K                                                                                                                                                                                                                                                                                                                                                                                                                                                                                                                                                                                                                                                                                               |
| EPI_ISL_486429                                                                                                                                                                                                                                                                                                                                                                                                                                                                                                                                                                                                                                                                                 | unknown                                                                                                                                                                                         | Clinical Laboratory, Hospital Israelita Albert Einstein                                                                                             | Malta, F., Amgarten, D., Guedes, R.L., Santana, R.A., de Menezes, F.G., Manguiera, C.L. and Pinho, J.R.                                                                                                                                                                                                                                                                                                                                                                                                                                                                                                                                                                                                                                                                                                                                                     |
| EPI_ISL_490026                                                                                                                                                                                                                                                                                                                                                                                                                                                                                                                                                                                                                                                                                 | South Eastern Area Laboratory Services (SEALS)                                                                                                                                                  | NSW Health Pathology - Institute of Clinical Pathology and Medical Research; Westmead Hospital; University of Sydney                                | CIDM-PH et al.                                                                                                                                                                                                                                                                                                                                                                                                                                                                                                                                                                                                                                                                                                                                                                                                                                              |
| EPI_ISL_492036                                                                                                                                                                                                                                                                                                                                                                                                                                                                                                                                                                                                                                                                                 | Instituto de Biologia do Exército                                                                                                                                                               | Laboratório Metabolismo Macromolecular Firmino Torres de Castro, Instituto de Biofísica Carlos Chagas Filho, Universidade Federal do Rio de Janeiro | Bianca Catarina Azevedo Cabral, Aline Rosa Vianna de Souza, Marcos Dornelas-Ribeiro, Tatiana LS Nogueira, Nádia Vaez Gonçalves da Cruz, Caleb GM Santos, Elizabeth Valentin, Marcio da Costa Cipitelli, Virginia Sara Grancieri do Amaral, Rodrigo Soares de Moura Neto, Clarissa Damaso, Rosane Silva                                                                                                                                                                                                                                                                                                                                                                                                                                                                                                                                                      |
| EPI_ISL_493851, EPI_ISL_493852, EPI_ISL_493868                                                                                                                                                                                                                                                                                                                                                                                                                                                                                                                                                                                                                                                 | West of Scotland Specialist Virology Centre, NHSGGC / MRC-University of Glasgow Centre for Virus Research                                                                                       | COVID-19 Genomics UK (COG-UK) Consortium                                                                                                            | Ana da Silva Filipe, Natasha Johnson, Kathy Smollett, Daniel Mair, Stephen Carmichael, Lily Tong, Jenna Nichols, Elihu Aranday-Cortes, Kirstyn Brunker, Yasmin Parr, Alice Broos, Kyriaki Nomikou; Sarah McDonald, Marc Niebel, Patawee Asamaphan; Richard Orton, Joseph Hughes, Sreenu Vattipally, David L Robertson; Alasdair MacLean, Rory Gunson; Kathy Li, Natasha Jesudason, Rajiv Shah, James Shepherd, Antonia Ho, Emma Thomson                                                                                                                                                                                                                                                                                                                                                                                                                     |
| EPI_ISL_500483, EPI_ISL_500875                                                                                                                                                                                                                                                                                                                                                                                                                                                                                                                                                                                                                                                                 | LACEN/PE                                                                                                                                                                                        | WallauLab, Aggeu Magalhaes Institute                                                                                                                | Marcelo Henrique Santos Paiva, Duschinka Ribeiro Duarte Guedes, Cássia Docena, Matheus Figueira Bezerra, Filipe Zimmer Dezordi, Laís Ceschini Machado, Larissa Krokovsky, Elisama Helvecio, Alexandre Freitas da Silva, Luydson Richardson Silva Vasconcelos, Antonio Mauro Rezende, Severino Jefferson Ribeiro da Silva, Kamila Gaudêncio da Silva Sales, Bruna Santos Lima Figueiredo de Sá, Derciliano Lopes da Cruz, Claudio Eduardo Cavalcanti, Armando de Menezes Neto, Caroline Targino Alves da Silva, Renata Pessôa Germano Mendes, Maria Almerice Lopes da Silva, Tiago Gráf, Paola Cristina Resende, Gonzalo Bello, Michelle da Silva Barros, Wheyverton Ricardo Correia do Nascimento, Rodrigo Moraes Loyo Arcoverde, Luciane Caroline Albuquerque Bezerra, Sival Pinto Brandão Filho, Constandência Fátima Junqueira Ayres, Gabriel Luz Wallau |
| EPI_ISL_502875                                                                                                                                                                                                                                                                                                                                                                                                                                                                                                                                                                                                                                                                                 | LACEN/PE                                                                                                                                                                                        | LABBE, Federal University of Pernambuco                                                                                                             | WILSON JOSE DA SILVA JUNIOR, HEIDI LACERDA ALVES DA CRUZ, MARCOS DA SILVEIRA REGUEIRA NETO, BRUNO SAMPAIO, SERGIO DE SA LEITAO PAIVA JUNIOR, ZILDENE DE SOUSA SILVEIRA, MAIRA GALDINO DA ROCHA PITTA, MICHELLE CRISTINY PEREIRA, REGINALDO GONCALVES DE LIMA NETO, MARCOS ANTONIO DE MORAIS JUNIOR, ANTONIO CARLOS DE FREITAS, VALDIR DE QUEIROZ BALBINO.                                                                                                                                                                                                                                                                                                                                                                                                                                                                                                   |
| EPI_ISL_508266                                                                                                                                                                                                                                                                                                                                                                                                                                                                                                                                                                                                                                                                                 | Government Medical College                                                                                                                                                                      | National Institute of Biomedical Genomics                                                                                                           | Arindam Maitra, Jyoti Iravane, Dhaval Khatri, Maitrik Dave, Saumitra Das                                                                                                                                                                                                                                                                                                                                                                                                                                                                                                                                                                                                                                                                                                                                                                                    |
| EPI_ISL_511103                                                                                                                                                                                                                                                                                                                                                                                                                                                                                                                                                                                                                                                                                 | Instituto Nacional de Saude (INSA)                                                                                                                                                              | Instituto Nacional de Saude (INSA)                                                                                                                  | Borges et al                                                                                                                                                                                                                                                                                                                                                                                                                                                                                                                                                                                                                                                                                                                                                                                                                                                |
| EPI_ISL_513514, EPI_ISL_513532, EPI_ISL_513546, EPI_ISL_513557, EPI_ISL_513578                                                                                                                                                                                                                                                                                                                                                                                                                                                                                                                                                                                                                 | Programa de Oncovirologia, Instituto Nacional de Câncer                                                                                                                                         | Programa de Oncovirologia, Instituto Nacional de Câncer                                                                                             | Juliana D. Siqueira, Livia R. Goes, Brunna M. Alves, Claudia Cicala, James Arthos, João P.B. Viola, Andreia C. de Melo, Marcelo A. Soares                                                                                                                                                                                                                                                                                                                                                                                                                                                                                                                                                                                                                                                                                                                   |
| EPI_ISL_515520                                                                                                                                                                                                                                                                                                                                                                                                                                                                                                                                                                                                                                                                                 | Hospital Municipal do Tatuape Carmino Caricchio                                                                                                                                                 | Instituto Adolfo Lutz, Interdisciplinary Procedures Center, Strategic Laboratory                                                                    | Claudio Tavares Sacchi, Claudia Regina Gonçalves, Erica Valessa Ramos Gomes                                                                                                                                                                                                                                                                                                                                                                                                                                                                                                                                                                                                                                                                                                                                                                                 |
| EPI_ISL_515524                                                                                                                                                                                                                                                                                                                                                                                                                                                                                                                                                                                                                                                                                 | PS Municipal Dr Lauro Ribas Braga                                                                                                                                                               | Instituto Adolfo Lutz, Interdisciplinary Procedures Center, Strategic Laboratory                                                                    | Claudio Tavares Sacchi, Claudia Regina Gonçalves, Erica Valessa Ramos Gomes                                                                                                                                                                                                                                                                                                                                                                                                                                                                                                                                                                                                                                                                                                                                                                                 |



|                                |                                                                                                         |                                                                                                         |                                                                                                                     |
|--------------------------------|---------------------------------------------------------------------------------------------------------|---------------------------------------------------------------------------------------------------------|---------------------------------------------------------------------------------------------------------------------|
| EPI_ISL_515529                 | Pronto Socorro Municipal Julio Tupy                                                                     | Instituto Adolfo Lutz, Interdisciplinary Procedures Center, Strategic Laboratory                        | Claudio Tavares Sacchi, Claudia Regina Gonçalves, Erica Valessa Ramos Gomes                                         |
| EPI_ISL_515541                 | Hospital Montemagno                                                                                     | Instituto Adolfo Lutz, Interdisciplinary Procedures Center, Strategic Laboratory                        | Claudio Tavares Sacchi, Claudia Regina Gonçalves, Erica Valessa Ramos Gomes                                         |
| EPI_ISL_515544                 | Ama Dr Jose Soares Hungria                                                                              | Instituto Adolfo Lutz, Interdisciplinary Procedures Center, Strategic Laboratory                        | Claudio Tavares Sacchi, Claudia Regina Gonçalves, Erica Valessa Ramos Gomes                                         |
| EPI_ISL_515547                 | Centro Medico da Policia Militar do Estado de Sao Paulo                                                 | Instituto Adolfo Lutz, Interdisciplinary Procedures Center, Strategic Laboratory                        | Claudio Tavares Sacchi, Claudia Regina Gonçalves, Erica Valessa Ramos Gomes                                         |
| EPI_ISL_515548                 | Hospital Municipal Dr. Jose Soares Hungria                                                              | Instituto Adolfo Lutz, Interdisciplinary Procedures Center, Strategic Laboratory                        | Claudio Tavares Sacchi, Claudia Regina Gonçalves, Erica Valessa Ramos Gomes                                         |
| EPI_ISL_515551, EPI_ISL_515552 | Hospital Municipal do Tatuape Carminio                                                                  | Instituto Adolfo Lutz, Interdisciplinary Procedures Center, Strategic Laboratory                        | Claudio Tavares Sacchi, Claudia Regina Gonçalves, Erica Valessa Ramos Gomes                                         |
| EPI_ISL_515553                 | Hospital Municipal Dr. Ignacio Proença de Gouvea                                                        | Instituto Adolfo Lutz, Interdisciplinary Procedures Center, Strategic Laboratory                        | Claudio Tavares Sacchi, Claudia Regina Gonçalves, Erica Valessa Ramos Gomes                                         |
| EPI_ISL_515554                 | Pronto Socorro Municipal de Perus                                                                       | Instituto Adolfo Lutz, Interdisciplinary Procedures Center, Strategic Laboratory                        | Claudio Tavares Sacchi, Claudia Regina Gonçalves, Erica Valessa Ramos Gomes                                         |
| EPI_ISL_515555                 | Hospital Geral de Vila Nova Cachoeirinha                                                                | Instituto Adolfo Lutz, Interdisciplinary Procedures Center, Strategic Laboratory                        | Claudio Tavares Sacchi, Claudia Regina Gonçalves, Erica Valessa Ramos Gomes                                         |
| EPI_ISL_515559                 | Hospital Sao Paulo de Ensino da Unifesp                                                                 | Instituto Adolfo Lutz, Interdisciplinary Procedures Center, Strategic Laboratory                        | Claudio Tavares Sacchi, Claudia Regina Gonçalves, Erica Valessa Ramos Gomes                                         |
| EPI_ISL_515561                 | Hospital Montemagno                                                                                     | Instituto Adolfo Lutz, Interdisciplinary Procedures Center, Strategic Laboratory                        | Claudio Tavares Sacchi, Claudia Regina Gonçalves, Erica Valessa Ramos Gomes                                         |
| EPI_ISL_515562                 | Hospital Municipal Doutor Alexandre Zaido                                                               | Instituto Adolfo Lutz, Interdisciplinary Procedures Center, Strategic Laboratory                        | Claudio Tavares Sacchi, Claudia Regina Gonçalves, Erica Valessa Ramos Gomes                                         |
| EPI_ISL_515563                 | Hospital Municipal Dr. Jose Soares Hungria                                                              | Instituto Adolfo Lutz, Interdisciplinary Procedures Center, Strategic Laboratory                        | Claudio Tavares Sacchi, Claudia Regina Gonçalves, Erica Valessa Ramos Gomes                                         |
| EPI_ISL_515565                 | Hospital do Servidor Público Estadual Francisco Morato de Oliveira                                      | Instituto Adolfo Lutz, Interdisciplinary Procedures Center, Strategic Laboratory                        | Claudio Tavares Sacchi, Claudia Regina Gonçalves, Erica Valessa Ramos Gomes                                         |
| EPI_ISL_515566                 | PS Municipal Dr Lauro Ribas Braga                                                                       | Instituto Adolfo Lutz, Interdisciplinary Procedures Center, Strategic Laboratory                        | Claudio Tavares Sacchi, Claudia Regina Gonçalves, Erica Valessa Ramos Gomes                                         |
| EPI_ISL_522491                 | Center for Laboratory Control of Infectious Diseases, Korea Centers for Diseases Control and Prevention | Center for Laboratory Control of Infectious Diseases, Korea Centers for Diseases Control and Prevention | Junyoung Kim, Ae Kyung Park, Eunkyung Shin, Jin Sun No, Jeong-Min Kim, Yoon-Seok Chung, Heui Man Kim, Myung Guk Han |
| EPI_ISL_523955                 | Hospital Municipal do Tatuape Carminio                                                                  | Instituto Adolfo Lutz, Interdisciplinary Procedures Center, Strategic Laboratory                        | Claudio Tavares Sacchi, Claudia Regina Gonçalves, Erica Valessa Ramos Gomes                                         |
| EPI_ISL_523957                 | Hospital Itamaraty                                                                                      | Instituto Adolfo Lutz, Interdisciplinary Procedures Center, Strategic Laboratory                        | Claudio Tavares Sacchi, Claudia Regina Gonçalves, Erica Valessa Ramos Gomes                                         |
| EPI_ISL_523958                 | Pronto Socorro Municipal de Perus                                                                       | Instituto Adolfo Lutz, Interdisciplinary Procedures Center, Strategic Laboratory                        | Claudio Tavares Sacchi, Claudia Regina Gonçalves, Erica Valessa Ramos Gomes                                         |
| EPI_ISL_523965                 | Hospital do Servidor Público Estadual Francisco Morato de Oliveira                                      | Instituto Adolfo Lutz, Interdisciplinary Procedures Center, Strategic Laboratory                        | Claudio Tavares Sacchi, Claudia Regina Gonçalves, Erica Valessa Ramos Gomes                                         |
| EPI_ISL_523969                 | Hospital Sao Paulo de Ensino da Unifesp                                                                 | Instituto Adolfo Lutz, Interdisciplinary Procedures Center, Strategic Laboratory                        | Claudio Tavares Sacchi, Claudia Regina Gonçalves, Erica Valessa Ramos Gomes                                         |
| EPI_ISL_523970                 | Conjunto Hospitalar do Mandaqui                                                                         | Instituto Adolfo Lutz, Interdisciplinary Procedures Center, Strategic Laboratory                        | Claudio Tavares Sacchi, Claudia Regina Gonçalves, Erica Valessa Ramos Gomes                                         |
| EPI_ISL_523971                 | Hospital Geral Santa Marcelina                                                                          | Instituto Adolfo Lutz, Interdisciplinary Procedures Center, Strategic Laboratory                        | Claudio Tavares Sacchi, Claudia Regina Gonçalves, Erica Valessa Ramos Gomes                                         |
| EPI_ISL_523974                 | Hospital Municipal do Tatuape Carminio                                                                  | Instituto Adolfo Lutz, Interdisciplinary Procedures Center, Strategic Laboratory                        | Claudio Tavares Sacchi, Claudia Regina Gonçalves, Erica Valessa Ramos Gomes                                         |
| EPI_ISL_523975                 | UPA Tito Lopes                                                                                          | Instituto Adolfo Lutz, Interdisciplinary Procedures Center, Strategic Laboratory                        | Claudio Tavares Sacchi, Claudia Regina Gonçalves, Erica Valessa Ramos Gomes                                         |
| EPI_ISL_523977                 | Hosp. Municipal Prof. Dr. Alípio Corrêa Netto                                                           | Instituto Adolfo Lutz, Interdisciplinary Procedures Center, Strategic Laboratory                        | Claudio Tavares Sacchi, Claudia Regina Gonçalves, Erica Valessa Ramos Gomes                                         |
| EPI_ISL_523978                 | Hospital do Servidor Público Estadual Francisco Morato de Oliveira                                      | Instituto Adolfo Lutz, Interdisciplinary Procedures Center, Strategic Laboratory                        | Claudio Tavares Sacchi, Claudia Regina Gonçalves, Erica Valessa Ramos Gomes                                         |
| EPI_ISL_523980                 | UPA Tito Lopes                                                                                          | Instituto Adolfo Lutz, Interdisciplinary Procedures Center, Strategic Laboratory                        | Claudio Tavares Sacchi, Claudia Regina Gonçalves, Erica Valessa Ramos Gomes                                         |
| EPI_ISL_523981                 | Hospital Sao Paulo de Ensino da Unifesp                                                                 | Instituto Adolfo Lutz, Interdisciplinary Procedures Center, Strategic Laboratory                        | Claudio Tavares Sacchi, Claudia Regina Gonçalves, Erica Valessa Ramos Gomes                                         |
| EPI_ISL_523982                 | Hospital do Servidor Público Estadual Francisco Morato de Oliveira                                      | Instituto Adolfo Lutz, Interdisciplinary Procedures Center, Strategic Laboratory                        | Claudio Tavares Sacchi, Claudia Regina Gonçalves, Erica Valessa Ramos Gomes                                         |
| EPI_ISL_523983                 | UPA Campo Limpo                                                                                         | Instituto Adolfo Lutz, Interdisciplinary Procedures Center, Strategic Laboratory                        | Claudio Tavares Sacchi, Claudia Regina Gonçalves, Erica Valessa Ramos Gomes                                         |
| EPI_ISL_523984, EPI_ISL_523986 | Ama Dr Jose Soares Hungria                                                                              | Instituto Adolfo Lutz, Interdisciplinary Procedures Center, Strategic Laboratory                        | Claudio Tavares Sacchi, Claudia Regina Gonçalves, Erica Valessa Ramos Gomes                                         |
| EPI_ISL_523988                 | Hospital Sao Paulo de Ensino da Unifesp                                                                 | Instituto Adolfo Lutz, Interdisciplinary Procedures Center, Strategic Laboratory                        | Claudio Tavares Sacchi, Claudia Regina Gonçalves, Erica Valessa Ramos Gomes                                         |
| EPI_ISL_523989                 | AMA Jardim Joamar                                                                                       | Instituto Adolfo Lutz, Interdisciplinary Procedures Center, Strategic Laboratory                        | Claudio Tavares Sacchi, Claudia Regina Gonçalves, Erica Valessa Ramos Gomes                                         |
| EPI_ISL_523990                 | AMA Jardim Peri                                                                                         | Instituto Adolfo Lutz, Interdisciplinary Procedures Center, Strategic Laboratory                        | Claudio Tavares Sacchi, Claudia Regina Gonçalves, Erica Valessa Ramos Gomes                                         |

|                                                                |                                                                                                     |                                                                                                     |                                                                                                                                                                                                                                                                                                                                                           |
|----------------------------------------------------------------|-----------------------------------------------------------------------------------------------------|-----------------------------------------------------------------------------------------------------|-----------------------------------------------------------------------------------------------------------------------------------------------------------------------------------------------------------------------------------------------------------------------------------------------------------------------------------------------------------|
| EPI_ISL_524462                                                 | Hospital Metropolitan                                                                               | Instituto Adolfo Lutz, Interdisciplinary Procedures Center, Strategic Laboratory                    | Claudio Tavares Sacchi, Claudia Regina Gonçalves, Erica Valessa Ramos Gomes                                                                                                                                                                                                                                                                               |
| EPI_ISL_524463                                                 | Hospital Regional de Cotia                                                                          | Instituto Adolfo Lutz, Interdisciplinary Procedures Center, Strategic Laboratory                    | Claudio Tavares Sacchi, Claudia Regina Gonçalves, Erica Valessa Ramos Gomes                                                                                                                                                                                                                                                                               |
| EPI_ISL_524464                                                 | Santa Casa de Santa Isabel                                                                          | Instituto Adolfo Lutz, Interdisciplinary Procedures Center, Strategic Laboratory                    | Claudio Tavares Sacchi, Claudia Regina Gonçalves, Erica Valessa Ramos Gomes                                                                                                                                                                                                                                                                               |
| EPI_ISL_524465                                                 | PS Municipal Dr. Caetano Virgilio Neto                                                              | Instituto Adolfo Lutz, Interdisciplinary Procedures Center, Strategic Laboratory                    | Claudio Tavares Sacchi, Claudia Regina Gonçalves, Erica Valessa Ramos Gomes                                                                                                                                                                                                                                                                               |
| EPI_ISL_524468                                                 | Hospital Municipal Vereador Jose Storopoli                                                          | Instituto Adolfo Lutz, Interdisciplinary Procedures Center, Strategic Laboratory                    | Claudio Tavares Sacchi, Claudia Regina Gonçalves, Erica Valessa Ramos Gomes                                                                                                                                                                                                                                                                               |
| EPI_ISL_524469                                                 | Santa Casa de Misericórdia de Sao Paulo                                                             | Instituto Adolfo Lutz, Interdisciplinary Procedures Center, Strategic Laboratory                    | Claudio Tavares Sacchi, Claudia Regina Gonçalves, Erica Valessa Ramos Gomes                                                                                                                                                                                                                                                                               |
| EPI_ISL_524783, EPI_ISL_524785, EPI_ISL_524786, EPI_ISL_524787 | Evandro Chagas Institute                                                                            | Evandro Chagas Institute                                                                            | Santos, M.C.; Silva, A.M.; Junior, W.D.C.; Barbagelata, L.S.; Ferreira, J.A.; Sousa, E.M.A.; da Silva, P.S.; Resque, H.R; Martins, L.C.; Sousa Junior, E.C.; Viana, G.M.R                                                                                                                                                                                 |
| EPI_ISL_527019, EPI_ISL_527032                                 | Area of Virology, Serology and Virology Division (SAVID), New South Wales Health Pathology Randwick | Area of Virology, Serology and Virology Division (SAVID), New South Wales Health Pathology Randwick | Rawlinson, W.                                                                                                                                                                                                                                                                                                                                             |
| EPI_ISL_527856                                                 | Hospital Municipal Prof. Waldomiro de Paula                                                         | Instituto Adolfo Lutz, Interdisciplinary Procedures Center, Strategic Laboratory                    | Claudio Tavares Sacchi, Claudia Regina Gonçalves, Erica Valessa Ramos Gomes                                                                                                                                                                                                                                                                               |
| EPI_ISL_527857                                                 | Hospital Regional Vale do Ribeira                                                                   | Instituto Adolfo Lutz, Interdisciplinary Procedures Center, Strategic Laboratory                    | Claudio Tavares Sacchi, Claudia Regina Gonçalves, Erica Valessa Ramos Gomes                                                                                                                                                                                                                                                                               |
| EPI_ISL_527860                                                 | Hospital Municipal de Parelheiros Josanias Castanha Braga                                           | Instituto Adolfo Lutz, Interdisciplinary Procedures Center, Strategic Laboratory                    | Claudio Tavares Sacchi, Claudia Regina Gonçalves, Erica Valessa Ramos Gomes                                                                                                                                                                                                                                                                               |
| EPI_ISL_527861                                                 | Hospital e Maternidade Celso Pierro                                                                 | Instituto Adolfo Lutz, Interdisciplinary Procedures Center, Strategic Laboratory                    | Av. Dr. Arnaldo, 355 - Brazil, Cerqueira Cesar, São Paulo - SP, 01246-1301                                                                                                                                                                                                                                                                                |
| EPI_ISL_527862                                                 | Hospital Municipal de Urgência                                                                      | Instituto Adolfo Lutz, Interdisciplinary Procedures Center, Strategic Laboratory                    | Claudio Tavares Sacchi, Claudia Regina Gonçalves, Erica Valessa Ramos Gomes                                                                                                                                                                                                                                                                               |
| EPI_ISL_527863                                                 | Hospital Municipal do Tatuape Carmino Caricchio                                                     | Instituto Adolfo Lutz, Interdisciplinary Procedures Center, Strategic Laboratory                    | Claudio Tavares Sacchi, Claudia Regina Gonçalves, Erica Valessa Ramos Gomes                                                                                                                                                                                                                                                                               |
| EPI_ISL_527865                                                 | Hospital e Maternidade São Cristóvão                                                                | Instituto Adolfo Lutz, Interdisciplinary Procedures Center, Strategic Laboratory                    | Claudio Tavares Sacchi, Claudia Regina Gonçalves, Erica Valessa Ramos Gomes                                                                                                                                                                                                                                                                               |
| EPI_ISL_527866                                                 | PS Municipal Dr Lauro Ribas Braga                                                                   | Instituto Adolfo Lutz, Interdisciplinary Procedures Center, Strategic Laboratory                    | Av. Dr. Arnaldo, 355 - Brazil, Cerqueira Cesar, São Paulo - SP, 01246-1301                                                                                                                                                                                                                                                                                |
| EPI_ISL_527868                                                 | Hospital e Maternidade do Braz                                                                      | Instituto Adolfo Lutz, Interdisciplinary Procedures Center, Strategic Laboratory                    | Claudio Tavares Sacchi, Claudia Regina Gonçalves, Erica Valessa Ramos Gomes                                                                                                                                                                                                                                                                               |
| EPI_ISL_527870                                                 | Hospital Municipal Mário Gatti                                                                      | Instituto Adolfo Lutz, Interdisciplinary Procedures Center, Strategic Laboratory                    | Claudio Tavares Sacchi, Claudia Regina Gonçalves, Erica Valessa Ramos Gomes                                                                                                                                                                                                                                                                               |
| EPI_ISL_534311                                                 | UPA III 26 de Agosto                                                                                | Instituto Adolfo Lutz, Interdisciplinary Procedures Center, Strategic Laboratory                    | Claudio Tavares Sacchi, Claudia Regina Gonçalves, Erica Valessa Ramos Gomes                                                                                                                                                                                                                                                                               |
| EPI_ISL_534314                                                 | Hospital Universitario da USP de SP                                                                 | Instituto Adolfo Lutz, Interdisciplinary Procedures Center, Strategic Laboratory                    | Claudio Tavares Sacchi, Claudia Regina Gonçalves, Erica Valessa Ramos Gomes                                                                                                                                                                                                                                                                               |
| EPI_ISL_534316                                                 | OS Mun Santana Lauro Ribas Braga                                                                    | Instituto Adolfo Lutz, Interdisciplinary Procedures Center, Strategic Laboratory                    | Claudio Tavares Sacchi, Claudia Regina Gonçalves, Erica Valessa Ramos Gomes                                                                                                                                                                                                                                                                               |
| EPI_ISL_534317                                                 | Hospital Geral de Itapevi                                                                           | Instituto Adolfo Lutz, Interdisciplinary Procedures Center, Strategic Laboratory                    | Claudio Tavares Sacchi, Claudia Regina Gonçalves, Erica Valessa Ramos Gomes                                                                                                                                                                                                                                                                               |
| EPI_ISL_534318                                                 | Hospital Municipal Antonio Giglio                                                                   | Instituto Adolfo Lutz, Interdisciplinary Procedures Center, Strategic Laboratory                    | Claudio Tavares Sacchi, Claudia Regina Gonçalves, Erica Valessa Ramos Gomes                                                                                                                                                                                                                                                                               |
| EPI_ISL_534320                                                 | Hospital do Serv Pub ESTAFCO Morato de Oliveira                                                     | Instituto Adolfo Lutz, Interdisciplinary Procedures Center, Strategic Laboratory                    | Claudio Tavares Sacchi, Claudia Regina Gonçalves, Erica Valessa Ramos Gomes                                                                                                                                                                                                                                                                               |
| EPI_ISL_534321                                                 | PS e Maternidade Nair Fonseca Leitao Arantes                                                        | Instituto Adolfo Lutz, Interdisciplinary Procedures Center, Strategic Laboratory                    | Claudio Tavares Sacchi, Claudia Regina Gonçalves, Erica Valessa Ramos Gomes                                                                                                                                                                                                                                                                               |
| EPI_ISL_534322                                                 | PS Mun Julio Tupy                                                                                   | Instituto Adolfo Lutz, Interdisciplinary Procedures Center, Strategic Laboratory                    | Claudio Tavares Sacchi, Claudia Regina Gonçalves, Erica Valessa Ramos Gomes                                                                                                                                                                                                                                                                               |
| EPI_ISL_534326                                                 | Notre Dame Intermedica Saude AS                                                                     | Instituto Adolfo Lutz, Interdisciplinary Procedures Center, Strategic Laboratory                    | Claudio Tavares Sacchi, Claudia Regina Gonçalves, Erica Valessa Ramos Gomes                                                                                                                                                                                                                                                                               |
| EPI_ISL_541343, EPI_ISL_541344                                 | LACEN/PR                                                                                            | Laboratory of Respiratory Viruses and Measles, Oswaldo Cruz Institute, FIOCRUZ                      | Paola Resende, Luciana Appolinario, Fernando Motta, Anna Carolina Paixão, Ana Carolina Mendonça, Jonathan Lopes, Irina Riediger, Maria do Carmo Debur, Marilda Siqueira                                                                                                                                                                                   |
| EPI_ISL_541354, EPI_ISL_541355, EPI_ISL_541359                 | Laboratory of Respiratory Viruses and Measles, Oswaldo Cruz Institute, FIOCRUZ                      | Laboratory of Respiratory Viruses and Measles, Oswaldo Cruz Institute, FIOCRUZ                      | Paola Resende, Luciana Appolinario, Fernando Motta, Anna Carolina Paixão, Ana Carolina Mendonça, Jonathan Lopes, Marilda Siqueira                                                                                                                                                                                                                         |
| EPI_ISL_541372, EPI_ISL_541386                                 | LACEN/SE                                                                                            | Laboratory of Respiratory Viruses and Measles, Oswaldo Cruz Institute, FIOCRUZ                      | Paola Resende, Luciana Appolinario, Fernando Motta, Anna Carolina Paixão, Ana Carolina Mendonça, Jonathan Lopes, Cliona Santos, Marilda Siqueira                                                                                                                                                                                                          |
| EPI_ISL_547433, EPI_ISL_547434, EPI_ISL_547435, EPI_ISL_547437 | Microbiology, Department of Pathology, St. Bernard's Hospital, Gibraltar Health Authority           | Respiratory Virus Unit, Microbiology Services Colindale, Public Health England                      | PHE Covid Sequencing Team, Dr Nicholas Cortes (Gibraltar), Charlotte Gilborn-Jones (Gibraltar)                                                                                                                                                                                                                                                            |
| EPI_ISL_547573                                                 | Vigilância em Saúde de Cajamar                                                                      | Instituto Adolfo Lutz, Interdisciplinary Procedures Center, Strategic Laboratory                    | Claudio Tavares Sacchi, Claudia Regina Gonçalves, Erica Valessa Ramos Gomes, Karoline Rodrigues Campos                                                                                                                                                                                                                                                    |
| EPI_ISL_549084                                                 | Akershus University Hospital, Department for Microbiology and Infectious Disease Control            | Norwegian Institute of Public Health, Department of Virology                                        | Kathrine Stene-Johansen, Kamilla Heddeland Instefjord, Hilde Elshaug, Rasmus Riis Kopperud, Hilde Synnøve Vollen, Karoline Bragstad, Olav Hungnes                                                                                                                                                                                                         |
| EPI_ISL_549833                                                 | Lighthouse Lab in Milton Keynes                                                                     | Wellcome Sanger Institute for the COVID-19 Genomics UK (COG-UK) consortium                          | The Lighthouse Lab in Milton Keynes and Alex Alderton, Roberto Amato, Sonia Goncalves, Ewan Harrison, David K. Jackson, Ian Johnston, Dominic Kwiatkowski, Cordelia Langford, John Sillitoe on behalf of the Wellcome Sanger Institute COVID-19 Surveillance Team ( <a href="http://www.sanger.ac.uk/covid-team">http://www.sanger.ac.uk/covid-team</a> ) |
| EPI_ISL_572340, EPI_ISL_572371, EPI_ISL_572379                 | LACEN/PE                                                                                            | WallauLab, Aggeu Magalhaes Institute                                                                | Marcelo Henrique Santos Paiva, Duschinka Ribeiro Duarte Guedes, Cássia Docena, Matheus Filgueira Bezerra, Filipe Zimmer Dezordi, Laís Ceschini Machado, Larissa Krokovsky, Elisama Helvecio, Alexandre Freitas da Silva, Luydson Richardson Silva Vasconcelos, Antonio Mauro Rezende, Severino                                                            |

|                                                                                                                                |                                                                                |                                                                                                                      |                                                                                                                                                                                                                                                                                                                                                                                                                                                                                                                                                             |
|--------------------------------------------------------------------------------------------------------------------------------|--------------------------------------------------------------------------------|----------------------------------------------------------------------------------------------------------------------|-------------------------------------------------------------------------------------------------------------------------------------------------------------------------------------------------------------------------------------------------------------------------------------------------------------------------------------------------------------------------------------------------------------------------------------------------------------------------------------------------------------------------------------------------------------|
|                                                                                                                                |                                                                                |                                                                                                                      | Jefferson Ribeiro da Silva, Kamila Gaudêncio da Silva Sales, Bruna Santos Lima Figueiredo de Sá, Derciliano Lopes da Cruz, Claudio Eduardo Cavalcanti, Armando de Menezes Neto, Caroline Targino Alves da Silva, Renata Pessoa Germano Mendes, Maria Almerice Lopes da Silva, Tiago Gräf, Paola Cristina Resende, Gonzalo Bello0, Michelle da Silva Barros, Wheverton Ricardo Correia do Nascimento., Rodrigo Moraes Loyo Arcoverde, Luciane Caroline Albuquerque Bezerra, Sival Pinto Brandão Filho, Constância Flávia Junqueira Ayres, Gabriel Luz Wallau |
| EPI_ISL_574577                                                                                                                 | Hospital Municipal Dr. Ignacio Proença de Gouvea                               | Instituto Adolfo Lutz, Interdisciplinary Procedures Center, Strategic Laboratory                                     | Claudio Tavares Sacchi, Claudia Regina Gonçalves, Erica Valessa Ramos Gomes, Karoline Rodrigues Campos                                                                                                                                                                                                                                                                                                                                                                                                                                                      |
| EPI_ISL_574578                                                                                                                 | Hospital Municipal Mário Gatti                                                 | Instituto Adolfo Lutz, Interdisciplinary Procedures Center, Strategic Laboratory                                     | Claudio Tavares Sacchi, Claudia Regina Gonçalves, Erica Valessa Ramos Gomes, Karoline Rodrigues Campos                                                                                                                                                                                                                                                                                                                                                                                                                                                      |
| EPI_ISL_574579                                                                                                                 | Hospital Municipal Dr. Ignacio Proença de Gouvea                               | Instituto Adolfo Lutz, Interdisciplinary Procedures Center, Strategic Laboratory                                     | Claudio Tavares Sacchi, Claudia Regina Gonçalves, Erica Valessa Ramos Gomes, Karoline Rodrigues Campos                                                                                                                                                                                                                                                                                                                                                                                                                                                      |
| EPI_ISL_574580                                                                                                                 | Hospital Cidade Tiradentes Carmen Prudente                                     | Instituto Adolfo Lutz, Interdisciplinary Procedures Center, Strategic Laboratory                                     | Claudio Tavares Sacchi, Claudia Regina Gonçalves, Erica Valessa Ramos Gomes, Karoline Rodrigues Campos                                                                                                                                                                                                                                                                                                                                                                                                                                                      |
| EPI_ISL_574582                                                                                                                 | Hospital Municipal Dr. Jose Soares Hungria                                     | Instituto Adolfo Lutz, Interdisciplinary Procedures Center, Strategic Laboratory                                     | Claudio Tavares Sacchi, Claudia Regina Gonçalves, Erica Valessa Ramos Gomes, Karoline Rodrigues Campos                                                                                                                                                                                                                                                                                                                                                                                                                                                      |
| EPI_ISL_574583                                                                                                                 | Secretaria Municipal de Saude de Jandira                                       | Instituto Adolfo Lutz, Interdisciplinary Procedures Center, Strategic Laboratory                                     | Claudio Tavares Sacchi, Claudia Regina Gonçalves, Erica Valessa Ramos Gomes, Karoline Rodrigues Campos                                                                                                                                                                                                                                                                                                                                                                                                                                                      |
| EPI_ISL_574588                                                                                                                 | Hospital Estadual Sumare                                                       | Instituto Adolfo Lutz, Interdisciplinary Procedures Center, Strategic Laboratory                                     | Claudio Tavares Sacchi, Claudia Regina Gonçalves, Erica Valessa Ramos Gomes, Karoline Rodrigues Campos                                                                                                                                                                                                                                                                                                                                                                                                                                                      |
| EPI_ISL_574589                                                                                                                 | Hospital Municipal Dr. Jose Soares Hungria                                     | Instituto Adolfo Lutz, Interdisciplinary Procedures Center, Strategic Laboratory                                     | Claudio Tavares Sacchi, Claudia Regina Gonçalves, Erica Valessa Ramos Gomes, Karoline Rodrigues Campos                                                                                                                                                                                                                                                                                                                                                                                                                                                      |
| EPI_ISL_574590                                                                                                                 | Unidade de Pronto Atendimento UPA I Santa Isabel                               | Instituto Adolfo Lutz, Interdisciplinary Procedures Center, Strategic Laboratory                                     | Claudio Tavares Sacchi, Claudia Regina Gonçalves, Erica Valessa Ramos Gomes, Karoline Rodrigues Campos                                                                                                                                                                                                                                                                                                                                                                                                                                                      |
| EPI_ISL_574591, EPI_ISL_574592                                                                                                 | Hospital Domingos Leonardo Ceravolo Presidente Prudente                        | Instituto Adolfo Lutz, Interdisciplinary Procedures Center, Strategic Laboratory                                     | Claudio Tavares Sacchi, Claudia Regina Gonçalves, Erica Valessa Ramos Gomes, Karoline Rodrigues Campos                                                                                                                                                                                                                                                                                                                                                                                                                                                      |
| EPI_ISL_574597                                                                                                                 | Secretaria Municipal de Saude de Jarinu                                        | Instituto Adolfo Lutz, Interdisciplinary Procedures Center, Strategic Laboratory                                     | Claudio Tavares Sacchi, Claudia Regina Gonçalves, Erica Valessa Ramos Gomes, Karoline Rodrigues Campos                                                                                                                                                                                                                                                                                                                                                                                                                                                      |
| EPI_ISL_574598                                                                                                                 | Servico de Verificacao de Obito SVO                                            | Instituto Adolfo Lutz, Interdisciplinary Procedures Center, Strategic Laboratory                                     | Claudio Tavares Sacchi, Claudia Regina Gonçalves, Erica Valessa Ramos Gomes, Karoline Rodrigues Campos                                                                                                                                                                                                                                                                                                                                                                                                                                                      |
| EPI_ISL_581703                                                                                                                 | University Hospital Basel, Clinical Virology                                   | University Hospital Basel, Clinical Bacteriology                                                                     | Madlen Stange, Alfredo Mari, Tim Roloff, Helena MB Seth-Smith, Michael Schweitzer, Myrta Brunner, Karoline Leuzinger, Kirstine K. Soegaard, Alexander Gensch, Sarah Tschudin-Sutter, Simon Fuchs, Julia Bielicki, Hans Pargger, Martin Siegemund, Christian Nickel, Roland Bingisser, Michael Osthoff, Stefano Bassetti, Rita Schneider-Sliwa, Manuel Battegay, Hans Hirsch, Adrian Egli                                                                                                                                                                    |
| EPI_ISL_582342                                                                                                                 | Cadham Provincial Laboratory                                                   | National Microbiology Laboratory (NML)                                                                               | Anna Majer, Shari Tyson, Grace Seo, Philip Mabon, Elsie Grudeski, Rhiannon Huzarewich, Russell Mandes, Anneliese Landgraff, Jennifer Tanner, Natalie Knox, Morag Graham, Gary Van Domselaar, Paul Van Caesele, Jared Bullard, David Alexander, Kerry Dust, Nathalie Bastien, Yan Li, Timothy Booth, Darian Hole, Madison Chapel, CanCOGeN's metadata curation team, Public Health Agency of Canada CanCOGeN team                                                                                                                                            |
| EPI_ISL_583490                                                                                                                 | Hospital Estadual Sumare                                                       | Instituto Adolfo Lutz, Interdisciplinary Procedures Center, Strategic Laboratory                                     | Claudio Tavares Sacchi, Claudia Regina Gonçalves, Erica Valessa Ramos Gomes, Karoline Rodrigues Campos                                                                                                                                                                                                                                                                                                                                                                                                                                                      |
| EPI_ISL_583492                                                                                                                 | Santa Casa Anna Cintra                                                         | Instituto Adolfo Lutz, Interdisciplinary Procedures Center, Strategic Laboratory                                     | Claudio Tavares Sacchi, Claudia Regina Gonçalves, Erica Valessa Ramos Gomes, Karoline Rodrigues Campos                                                                                                                                                                                                                                                                                                                                                                                                                                                      |
| EPI_ISL_583494                                                                                                                 | CS II Dr. Antonio Vicoso Moreira de Rezende Sumare                             | Instituto Adolfo Lutz, Interdisciplinary Procedures Center, Strategic Laboratory                                     | Claudio Tavares Sacchi, Claudia Regina Gonçalves, Erica Valessa Ramos Gomes, Karoline Rodrigues Campos                                                                                                                                                                                                                                                                                                                                                                                                                                                      |
| EPI_ISL_583496                                                                                                                 | UPA Jandira                                                                    | Instituto Adolfo Lutz, Interdisciplinary Procedures Center, Strategic Laboratory                                     | Claudio Tavares Sacchi, Claudia Regina Gonçalves, Erica Valessa Ramos Gomes, Karoline Rodrigues Campos                                                                                                                                                                                                                                                                                                                                                                                                                                                      |
| EPI_ISL_583497                                                                                                                 | Complexo Hospitalar Ouro Verde de Campinas                                     | Instituto Adolfo Lutz, Interdisciplinary Procedures Center, Strategic Laboratory                                     | Claudio Tavares Sacchi, Claudia Regina Gonçalves, Erica Valessa Ramos Gomes, Karoline Rodrigues Campos                                                                                                                                                                                                                                                                                                                                                                                                                                                      |
| EPI_ISL_583498                                                                                                                 | Hospital Municipal Dr. Waldemar Tebaldi                                        | Instituto Adolfo Lutz, Interdisciplinary Procedures Center, Strategic Laboratory                                     | Claudio Tavares Sacchi, Claudia Regina Gonçalves, Erica Valessa Ramos Gomes, Karoline Rodrigues Campos                                                                                                                                                                                                                                                                                                                                                                                                                                                      |
| EPI_ISL_583500                                                                                                                 | Centro de Saude I Tacito Leite de Carvalho e Silva                             | Instituto Adolfo Lutz, Interdisciplinary Procedures Center, Strategic Laboratory                                     | Claudio Tavares Sacchi, Claudia Regina Gonçalves, Erica Valessa Ramos Gomes, Karoline Rodrigues Campos                                                                                                                                                                                                                                                                                                                                                                                                                                                      |
| EPI_ISL_583502                                                                                                                 | Serv de Vig Sanitaria Epidemio e CTRL de Zoonoses Guaruja                      | Instituto Adolfo Lutz, Interdisciplinary Procedures Center, Strategic Laboratory                                     | Claudio Tavares Sacchi, Claudia Regina Gonçalves, Erica Valessa Ramos Gomes, Karoline Rodrigues Campos                                                                                                                                                                                                                                                                                                                                                                                                                                                      |
| EPI_ISL_583503                                                                                                                 | CTA Centro de Testagem e Aconselhamento                                        | Instituto Adolfo Lutz, Interdisciplinary Procedures Center, Strategic Laboratory                                     | Claudio Tavares Sacchi, Claudia Regina Gonçalves, Erica Valessa Ramos Gomes, Karoline Rodrigues Campos                                                                                                                                                                                                                                                                                                                                                                                                                                                      |
| EPI_ISL_583504, EPI_ISL_583505                                                                                                 | Casa de Saude Stella Maris                                                     | Instituto Adolfo Lutz, Interdisciplinary Procedures Center, Strategic Laboratory                                     | Claudio Tavares Sacchi, Claudia Regina Gonçalves, Erica Valessa Ramos Gomes, Karoline Rodrigues Campos                                                                                                                                                                                                                                                                                                                                                                                                                                                      |
| EPI_ISL_590506, EPI_ISL_590564                                                                                                 | Lighthouse Lab in Glasgow                                                      | Wellcome Sanger Institute for the COVID-19 Genomics UK (COG-UK) consortium                                           | Harper VanSteenhouse, Yumi Kasai, David Gray, Carol Clugston, Anna Dominiczak and Alex Alderton, Roberto Amato, Sonia Goncalves, Ewan Harrison, David K. Jackson, Ian Johnston, Dominic Kwiatkowski, Cordelia Langford, John Sillitoe on behalf of the Wellcome Sanger Institute COVID-19 Surveillance Team ( <a href="http://www.sanger.ac.uk/covid-team">http://www.sanger.ac.uk/covid-team</a> )                                                                                                                                                         |
| EPI_ISL_591352, EPI_ISL_591372, EPI_ISL_591402, EPI_ISL_591411, EPI_ISL_591449, EPI_ISL_591450, EPI_ISL_591537, EPI_ISL_591538 | Pathogen Genomics Center, National Institute of Infectious Diseases            | Pathogen Genomics Center, National Institute of Infectious Diseases                                                  | Tsuyoshi Sekizuka, Kentaro Itokawa, Rina Tanaka, Masanori Hashino, Makoto Kuroda                                                                                                                                                                                                                                                                                                                                                                                                                                                                            |
| EPI_ISL_593687, EPI_ISL_593698, EPI_ISL_593711                                                                                 | South Eastern Area Laboratory Services (SEALS)                                 | NSW Health Pathology - Institute of Clinical Pathology and Medical Research; Westmead Hospital; University of Sydney | CIDM-PH et al.                                                                                                                                                                                                                                                                                                                                                                                                                                                                                                                                              |
| EPI_ISL_593819                                                                                                                 | Respiratory Virus Unit, Microbiology Services Colindale, Public Health England | Respiratory Virus Unit, Microbiology Services Colindale, Public Health England                                       | PHE Covid Sequencing Team                                                                                                                                                                                                                                                                                                                                                                                                                                                                                                                                   |
| EPI_ISL_603023                                                                                                                 | Vigilância em Saúde Visa Sul                                                   | Instituto Adolfo Lutz, Interdisciplinary Procedures Center, Strategic Laboratory                                     | Claudio Tavares Sacchi, Claudia Regina Gonçalves, Erica Valessa Ramos Gomes, Karoline Rodrigues Campos                                                                                                                                                                                                                                                                                                                                                                                                                                                      |
| EPI_ISL_603028                                                                                                                 | Hospital Municipal Santa Ana                                                   | Instituto Adolfo Lutz, Interdisciplinary Procedures Center, Strategic Laboratory                                     | Claudio Tavares Sacchi, Claudia Regina Gonçalves, Erica Valessa Ramos Gomes, Karoline Rodrigues Campos                                                                                                                                                                                                                                                                                                                                                                                                                                                      |
| EPI_ISL_603030                                                                                                                 | Hospital Domingos Leonardo Ceravolo Presidente Prudente                        | Instituto Adolfo Lutz, Interdisciplinary Procedures Center, Strategic Laboratory                                     | Claudio Tavares Sacchi, Claudia Regina Gonçalves, Erica Valessa Ramos Gomes, Karoline Rodrigues Campos                                                                                                                                                                                                                                                                                                                                                                                                                                                      |
| EPI_ISL_603033                                                                                                                 | Vigilancia Epidemiologica de São Bernardo do Campo                             | Instituto Adolfo Lutz, Interdisciplinary Procedures Center,                                                          | Claudio Tavares Sacchi, Claudia Regina Gonçalves, Erica Valessa Ramos Gomes, Karoline Rodrigues Campos                                                                                                                                                                                                                                                                                                                                                                                                                                                      |

| Accession Number                                                                                                                                                                                                                                                                                               | Organization                                                                                                                    | Location                                                                                                                          | Principal Investigator                                                                                                                                                                                                                                                                                                                                                                                    |
|----------------------------------------------------------------------------------------------------------------------------------------------------------------------------------------------------------------------------------------------------------------------------------------------------------------|---------------------------------------------------------------------------------------------------------------------------------|-----------------------------------------------------------------------------------------------------------------------------------|-----------------------------------------------------------------------------------------------------------------------------------------------------------------------------------------------------------------------------------------------------------------------------------------------------------------------------------------------------------------------------------------------------------|
| EPI_ISL_603034                                                                                                                                                                                                                                                                                                 | Departamento de Vigilância à Saúde                                                                                              | Instituto Adolfo Lutz, Interdisciplinary Procedures Center, Strategic Laboratory                                                  | Claudio Tavares Sacchi, Claudia Regina Gonçalves, Erica Valessa Ramos Gomes, Karoline Rodrigues Campos                                                                                                                                                                                                                                                                                                    |
| EPI_ISL_603036                                                                                                                                                                                                                                                                                                 | Hospital Santa Ana                                                                                                              | Instituto Adolfo Lutz, Interdisciplinary Procedures Center, Strategic Laboratory                                                  | Claudio Tavares Sacchi, Claudia Regina Gonçalves, Erica Valessa Ramos Gomes, Karoline Rodrigues Campos                                                                                                                                                                                                                                                                                                    |
| EPI_ISL_603037                                                                                                                                                                                                                                                                                                 | Hospital Geral de Pedreira                                                                                                      | Instituto Adolfo Lutz, Interdisciplinary Procedures Center, Strategic Laboratory                                                  | Claudio Tavares Sacchi, Claudia Regina Gonçalves, Erica Valessa Ramos Gomes, Karoline Rodrigues Campos                                                                                                                                                                                                                                                                                                    |
| EPI_ISL_613964                                                                                                                                                                                                                                                                                                 | Laboratory of Molecular Biology, Blood Center of Ribeirão Preto, Faculty of Medicine of Ribeirão Preto, University of São Paulo | Laboratory of Molecular Biology, Blood Center of Ribeirão Preto, Faculty of Medicine of Ribeirão Preto, University of São Paulo   | Svetoslav N Slavov, Marta Giovanetti, Vagner Fonseca, Elaine V Santos, Evandra S Rodrigues, Talita Adelino, Joilson Xavier, Glauco de Carvalho Pereira, Aparecida Y Yamamoto, Diego Villa Clé, Rodrigo T Calado; Dimas T Covas, Luiz CJ Alcantara, Simone Kashima                                                                                                                                         |
| EPI_ISL_623130, EPI_ISL_623131                                                                                                                                                                                                                                                                                 | Laboratório de Virologia Molecular / UFRJ                                                                                       | Bioinformatics Laboratory / LNCC                                                                                                  | Carolina M Voloch, Ronaldo S Francisco Jr, Luiz G P de Almeida, Otavio J. Brustolini, Cynthia C Cardoso, Alexandra L Gerber, Ana Paula de C Guimarães, Diana Mariani, Covid19-UFRJ Workgroup, Luís Cristóvão Pôrto, Renato S Aguiar, Terezinha M P P Castiñeiras, Orlando C. Ferreira, Amílcar Tanuri, Ana Tereza R de Vasconcelos                                                                        |
| EPI_ISL_629164, EPI_ISL_630998, EPI_ISL_631036                                                                                                                                                                                                                                                                 | Lighthouse Lab in Milton Keynes                                                                                                 | Wellcome Sanger Institute for the COVID-19 Genomics UK (COG-UK) consortium                                                        | The Lighthouse Lab in Milton Keynes and Alex Alderton, Roberto Amato, Sonia Goncalves, Ewan Harrison, David K. Jackson, Ian Johnston, Dominic Kwiatkowski, Cordelia Langford, John Sillitoe on behalf of the Wellcome Sanger Institute COVID-19 Surveillance Team                                                                                                                                         |
| EPI_ISL_636934                                                                                                                                                                                                                                                                                                 | Public Health Ontario Laboratory                                                                                                | Public Health Ontario Laboratory                                                                                                  | Vanessa G Allen, Philip Banh, Richard de Borja, Yao Chen, Alireza Eshaghi, Nahuel Fittipaldi, Christine Frantz, Jonathan B Gubbay, Jennifer L Guthrie, Lawrence Heisler, Esha Joshi, Michael Laszloffy, Aimin Li, Michael CY Li, Dean Maxwell, Sandeep Nagra, Samir N Patel, Heather Rilkoff, Jared Simpson, Karthikeyan Sivaraman, Yogi Sundaravadanam, Sarah Teatero, Andre Villegas, Sandra Zittermann |
| EPI_ISL_651545, EPI_ISL_652142                                                                                                                                                                                                                                                                                 | Oxford Viromics, NDM, University of Oxford; Oxford University Hospitals; Basingstoke and North Hampshire Hospital               | COVID-19 Genomics UK (COG-UK) Consortium                                                                                          | Tanya Golubchik, David Bonsall, George Macintyre, Amy Trebes, Mariateresa de Cesare, Catrin Moore, Alex Mobbs, Anita Justice, Robert Shaw, Monique Andersson, Timothy Peto, Emma Wise, Nathan Moore, Jessica Lynch, Nick Cortes, Matilde Mori, Stephen Kidd, David Buck, John Todd, Christophe Fraser                                                                                                     |
| EPI_ISL_667561, EPI_ISL_667578, EPI_ISL_667626, EPI_ISL_667633, EPI_ISL_667639, EPI_ISL_667649, EPI_ISL_667650, EPI_ISL_667663, EPI_ISL_667738                                                                                                                                                                 | Pathogen Genomics Center, National Institute of Infectious Diseases                                                             | Pathogen Genomics Center, National Institute of Infectious Diseases                                                               | Tsuyoshi Sekizuka, Kentaro Itokawa, Rina Tanaka, Masanori Hashino, Makoto Kuroda                                                                                                                                                                                                                                                                                                                          |
| EPI_ISL_668335                                                                                                                                                                                                                                                                                                 | Lighthouse Lab in Glasgow                                                                                                       | Wellcome Sanger Institute for the COVID-19 Genomics UK (COG-UK) Consortium                                                        | Harper VanSteenhouse, Yumi Kasai, David Gray, Carol Clugston, Anna Dominiczak and Alex Alderton, Roberto Amato, Sonia Goncalves, Ewan Harrison, David K. Jackson, Ian Johnston, Dominic Kwiatkowski, Cordelia Langford, John Sillitoe on behalf of the Wellcome Sanger Institute COVID-19 Surveillance Team ( <a href="http://www.sanger.ac.uk/covid-team">http://www.sanger.ac.uk/covid-team</a> )       |
| EPI_ISL_672205                                                                                                                                                                                                                                                                                                 | The Ashley Laboratory, Stanford University                                                                                      | Chan-Zuckerberg Biohub                                                                                                            | CZB Cliahub Consortium                                                                                                                                                                                                                                                                                                                                                                                    |
| EPI_ISL_672672, EPI_ISL_672673, EPI_ISL_672677, EPI_ISL_672678                                                                                                                                                                                                                                                 | DB Diagnosticos do Brasil                                                                                                       | Laboratório de Parasitologia Médica - Instituto de Medicina Tropical - Universidade de São Paulo                                  | Brazil-UK Centre for Arbovirus Discovery Diagnosis Genomics and Epidemiology (CADDE) Genomic Network - Instituto de Medicina Tropical                                                                                                                                                                                                                                                                     |
| EPI_ISL_672687, EPI_ISL_672690, EPI_ISL_672691, EPI_ISL_672692, EPI_ISL_672693, EPI_ISL_672694, EPI_ISL_672697, EPI_ISL_672699, EPI_ISL_672700                                                                                                                                                                 | Hospital das Clínicas da Faculdade de Medicina da Universidade de São Paulo (HC-FMUSP)                                          | Laboratório de Parasitologia Médica - Instituto de Medicina Tropical - Universidade de São Paulo                                  | Brazil-UK Centre for Arbovirus Discovery Diagnosis Genomics and Epidemiology (CADDE) Genomic Network - Instituto de Medicina Tropical                                                                                                                                                                                                                                                                     |
| EPI_ISL_672701, EPI_ISL_672702, EPI_ISL_672703, EPI_ISL_672704, EPI_ISL_672705, EPI_ISL_672706, EPI_ISL_672707, EPI_ISL_672708, EPI_ISL_672710, EPI_ISL_672711, EPI_ISL_672713, EPI_ISL_672714, EPI_ISL_672715, EPI_ISL_672716, EPI_ISL_672717, EPI_ISL_672718, EPI_ISL_672719, EPI_ISL_672720, EPI_ISL_672721 | see above                                                                                                                       | Institute of Tropical Medicine at the University of São Paulo (IMT-USP)                                                           | Laboratório de Parasitologia Médica - Instituto de Medicina Tropical - Universidade de São Paulo                                                                                                                                                                                                                                                                                                          |
| EPI_ISL_672722, EPI_ISL_672725, EPI_ISL_672726, EPI_ISL_672727, EPI_ISL_672729, EPI_ISL_672732, EPI_ISL_672734, EPI_ISL_672735, EPI_ISL_672739, EPI_ISL_672740, EPI_ISL_672741, EPI_ISL_672742, EPI_ISL_672743                                                                                                 | see above                                                                                                                       | Hospital das Clínicas da Faculdade de Medicina da Universidade de São Paulo (HC-FMUSP)                                            | Laboratório de Parasitologia Médica - Instituto de Medicina Tropical - Universidade de São Paulo                                                                                                                                                                                                                                                                                                          |
| EPI_ISL_672747, EPI_ISL_672748, EPI_ISL_672749                                                                                                                                                                                                                                                                 | Institute of Tropical Medicine at the University of São Paulo (IMT-USP)                                                         | Laboratório de Parasitologia Médica - Instituto de Medicina Tropical - Universidade de São Paulo                                  | Brazil-UK Centre for Arbovirus Discovery Diagnosis Genomics and Epidemiology (CADDE) Genomic Network - Instituto de Medicina Tropical                                                                                                                                                                                                                                                                     |
| EPI_ISL_673528                                                                                                                                                                                                                                                                                                 | Lighthouse Lab in Cambridge                                                                                                     | Wellcome Sanger Institute for the COVID-19 Genomics UK (COG-UK) Consortium                                                        | Rob Howes, The Lighthouse Lab in Cambridge and Alex Alderton, Roberto Amato, Sonia Goncalves, Ewan Harrison, David K. Jackson, Ian Johnston, Dominic Kwiatkowski, Cordelia Langford, John Sillitoe on behalf of the Wellcome Sanger Institute COVID-19 Surveillance Team                                                                                                                                  |
| EPI_ISL_677211, EPI_ISL_677212                                                                                                                                                                                                                                                                                 | Virginia Division of Consolidated Laboratory Services                                                                           | Virginia Division of Consolidated Laboratory Services                                                                             | Virginia DCLS                                                                                                                                                                                                                                                                                                                                                                                             |
| EPI_ISL_678320                                                                                                                                                                                                                                                                                                 | Area of Virology, Serology and Virology Division (SAVID), New South Wales Health Pathology Randwick                             | Virology Research Laboratory, Area of Virology, Serology and Virology Division (SAVID), New South Wales Health Pathology Randwick | Foster, C.; Au, J.; Ruiz Silva, M.; Deveson, I.; Bull, R.; Van Hal, S.; Rawlinson, W.                                                                                                                                                                                                                                                                                                                     |
| EPI_ISL_683969                                                                                                                                                                                                                                                                                                 | DOHMH Morrisania                                                                                                                | New York City Public Health Laboratory                                                                                            | Jade Wang, et al.                                                                                                                                                                                                                                                                                                                                                                                         |
| EPI_ISL_690635                                                                                                                                                                                                                                                                                                 | Pathogen Genomics Center, National Institute of Infectious Diseases                                                             | Pathogen Genomics Center, National Institute of Infectious Diseases                                                               | Tsuyoshi Sekizuka, Kentaro Itokawa, Rina Tanaka, Masanori Hashino, Makoto Kuroda                                                                                                                                                                                                                                                                                                                          |
| EPI_ISL_690818                                                                                                                                                                                                                                                                                                 | Kanagawa Prefectural Institute of Public Health                                                                                 | Pathogen Genomics Center, National Institute of Infectious Diseases                                                               | Tsuyoshi Sekizuka, Kentaro Itokawa, Rina Tanaka, Masanori Hashino, Makoto Kuroda                                                                                                                                                                                                                                                                                                                          |
| EPI_ISL_693195                                                                                                                                                                                                                                                                                                 | Hospital e Pronto Socorro Portinari                                                                                             | Instituto Adolfo Lutz, Interdisciplinary Procedures Center, Strategic Laboratory                                                  | Claudio Tavares Sacchi, Claudia Regina Gonçalves, Erica Valessa Ramos Gomes, Karoline Rodrigues Campos                                                                                                                                                                                                                                                                                                    |
| EPI_ISL_693196                                                                                                                                                                                                                                                                                                 | Hospital Santa Clara                                                                                                            | Instituto Adolfo Lutz, Interdisciplinary Procedures Center, Strategic Laboratory                                                  | Claudio Tavares Sacchi, Claudia Regina Gonçalves, Erica Valessa Ramos Gomes, Karoline Rodrigues Campos                                                                                                                                                                                                                                                                                                    |
| EPI_ISL_693197                                                                                                                                                                                                                                                                                                 | Central de Rede de Frio Municipal                                                                                               | Instituto Adolfo Lutz, Interdisciplinary Procedures Center, Strategic Laboratory                                                  | Claudio Tavares Sacchi, Claudia Regina Gonçalves, Erica Valessa Ramos Gomes, Karoline Rodrigues Campos                                                                                                                                                                                                                                                                                                    |
| EPI_ISL_693198                                                                                                                                                                                                                                                                                                 | Santa Casa de Misericórdia de Sao Paulo - Hospital Central                                                                      | Instituto Adolfo Lutz, Interdisciplinary Procedures Center, Strategic Laboratory                                                  | Claudio Tavares Sacchi, Claudia Regina Gonçalves, Erica Valessa Ramos Gomes, Karoline Rodrigues Campos                                                                                                                                                                                                                                                                                                    |
| EPI_ISL_693199                                                                                                                                                                                                                                                                                                 | Hospital do Servidor Publico Estadual Francisco Morato de Oliveira                                                              | Instituto Adolfo Lutz, Interdisciplinary Procedures Center, Strategic Laboratory                                                  | Claudio Tavares Sacchi, Claudia Regina Gonçalves, Erica Valessa Ramos Gomes, Karoline Rodrigues Campos                                                                                                                                                                                                                                                                                                    |
| EPI_ISL_693200                                                                                                                                                                                                                                                                                                 | Hospital e Maternidade Mairipora                                                                                                | Instituto Adolfo Lutz, Interdisciplinary Procedures Center, Strategic Laboratory                                                  | Claudio Tavares Sacchi, Claudia Regina Gonçalves, Erica Valessa Ramos Gomes, Karoline Rodrigues Campos                                                                                                                                                                                                                                                                                                    |
| EPI_ISL_693201                                                                                                                                                                                                                                                                                                 | Hospital Sao Paulo de Ensino da Unifesp                                                                                         | Instituto Adolfo Lutz, Interdisciplinary Procedures Center, Strategic Laboratory                                                  | Claudio Tavares Sacchi, Claudia Regina Gonçalves, Erica Valessa Ramos Gomes, Karoline Rodrigues Campos                                                                                                                                                                                                                                                                                                    |
| EPI_ISL_693202                                                                                                                                                                                                                                                                                                 | Pronto Socorro Municipal Prof. Joao Catarin Mezomo                                                                              | Instituto Adolfo Lutz, Interdisciplinary Procedures Center, Strategic Laboratory                                                  | Claudio Tavares Sacchi, Claudia Regina Gonçalves, Erica Valessa Ramos Gomes, Karoline Rodrigues Campos                                                                                                                                                                                                                                                                                                    |
| EPI_ISL_693203                                                                                                                                                                                                                                                                                                 | Hospital Municipal Doutor Arthur Ribeiro de Saboya                                                                              | Instituto Adolfo Lutz, Interdisciplinary Procedures Center, Strategic Laboratory                                                  | Claudio Tavares Sacchi, Claudia Regina Gonçalves, Erica Valessa Ramos Gomes, Karoline Rodrigues Campos                                                                                                                                                                                                                                                                                                    |

|                                                |                                                         |                                                                                  |                                                                                                                                                                                                                                                                                                 |
|------------------------------------------------|---------------------------------------------------------|----------------------------------------------------------------------------------|-------------------------------------------------------------------------------------------------------------------------------------------------------------------------------------------------------------------------------------------------------------------------------------------------|
| EPI_ISL_693204                                 | Pronto Socorro Dr. Conrado Cesarino Nuvolini            | Instituto Adolfo Lutz, Interdisciplinary Procedures Center, Strategic Laboratory | Claudio Tavares Sacchi, Claudia Regina Gonçalves, Erica Valessa Ramos Gomes, Karoline Rodrigues Campos                                                                                                                                                                                          |
| EPI_ISL_693205                                 | Hospital de Campanha Covid-19 Assis                     | Instituto Adolfo Lutz, Interdisciplinary Procedures Center, Strategic Laboratory | Claudio Tavares Sacchi, Claudia Regina Gonçalves, Erica Valessa Ramos Gomes, Karoline Rodrigues Campos                                                                                                                                                                                          |
| EPI_ISL_693206                                 | Hospital Municipal Mario Gatti                          | Instituto Adolfo Lutz, Interdisciplinary Procedures Center, Strategic Laboratory | Claudio Tavares Sacchi, Claudia Regina Gonçalves, Erica Valessa Ramos Gomes, Karoline Rodrigues Campos                                                                                                                                                                                          |
| EPI_ISL_693207                                 | Cs II Doutor Antonio Vicoso Moreira de Rezende          | Instituto Adolfo Lutz, Interdisciplinary Procedures Center, Strategic Laboratory | Claudio Tavares Sacchi, Claudia Regina Gonçalves, Erica Valessa Ramos Gomes, Karoline Rodrigues Campos                                                                                                                                                                                          |
| EPI_ISL_693208                                 | Hospital Municipal Antonio Giglio                       | Instituto Adolfo Lutz, Interdisciplinary Procedures Center, Strategic Laboratory | Claudio Tavares Sacchi, Claudia Regina Gonçalves, Erica Valessa Ramos Gomes, Karoline Rodrigues Campos                                                                                                                                                                                          |
| EPI_ISL_693210                                 | Pronto-Socorro Dr. Osmar Mesquita                       | Instituto Adolfo Lutz, Interdisciplinary Procedures Center, Strategic Laboratory | Claudio Tavares Sacchi, Claudia Regina Gonçalves, Erica Valessa Ramos Gomes, Karoline Rodrigues Campos                                                                                                                                                                                          |
| EPI_ISL_693211                                 | Santa Casa de Misericórdia e Maternidade                | Instituto Adolfo Lutz, Interdisciplinary Procedures Center, Strategic Laboratory | Claudio Tavares Sacchi, Claudia Regina Gonçalves, Erica Valessa Ramos Gomes, Karoline Rodrigues Campos                                                                                                                                                                                          |
| EPI_ISL_693212                                 | Santa Casa de Misericórdia de Bragança Paulista         | Instituto Adolfo Lutz, Interdisciplinary Procedures Center, Strategic Laboratory | Claudio Tavares Sacchi, Claudia Regina Gonçalves, Erica Valessa Ramos Gomes, Karoline Rodrigues Campos                                                                                                                                                                                          |
| EPI_ISL_693214                                 | Unidade de Pronto Atendimento Central de Caraguatatuba  | Instituto Adolfo Lutz, Interdisciplinary Procedures Center, Strategic Laboratory | Claudio Tavares Sacchi, Claudia Regina Gonçalves, Erica Valessa Ramos Gomes, Karoline Rodrigues Campos                                                                                                                                                                                          |
| EPI_ISL_693215                                 | Secretaria Municipal de Saúde de Iracemópolis           | Instituto Adolfo Lutz, Interdisciplinary Procedures Center, Strategic Laboratory | Claudio Tavares Sacchi, Claudia Regina Gonçalves, Erica Valessa Ramos Gomes, Karoline Rodrigues Campos                                                                                                                                                                                          |
| EPI_ISL_693216, EPI_ISL_693217                 | Unidade de Vigilância Epidemiológica de Araras          | Instituto Adolfo Lutz, Interdisciplinary Procedures Center, Strategic Laboratory | Claudio Tavares Sacchi, Claudia Regina Gonçalves, Erica Valessa Ramos Gomes, Karoline Rodrigues Campos                                                                                                                                                                                          |
| EPI_ISL_693220, EPI_ISL_693223, EPI_ISL_693224 | Laboratório Municipal de Piracicaba                     | Instituto Adolfo Lutz, Interdisciplinary Procedures Center, Strategic Laboratory | Claudio Tavares Sacchi, Claudia Regina Gonçalves, Erica Valessa Ramos Gomes, Karoline Rodrigues Campos                                                                                                                                                                                          |
| EPI_ISL_693225                                 | Ubs Vila Rosa - Olímpia Gomes De Almeida                | Instituto Adolfo Lutz, Interdisciplinary Procedures Center, Strategic Laboratory | Claudio Tavares Sacchi, Claudia Regina Gonçalves, Erica Valessa Ramos Gomes, Karoline Rodrigues Campos                                                                                                                                                                                          |
| EPI_ISL_693226                                 | Unidade de Pronto Atendimento Sao José                  | Instituto Adolfo Lutz, Interdisciplinary Procedures Center, Strategic Laboratory | Claudio Tavares Sacchi, Claudia Regina Gonçalves, Erica Valessa Ramos Gomes, Karoline Rodrigues Campos                                                                                                                                                                                          |
| EPI_ISL_693228                                 | Secretaria Municipal de Sorocaba                        | Instituto Adolfo Lutz, Interdisciplinary Procedures Center, Strategic Laboratory | Claudio Tavares Sacchi, Claudia Regina Gonçalves, Erica Valessa Ramos Gomes, Karoline Rodrigues Campos                                                                                                                                                                                          |
| EPI_ISL_693229                                 | Hospital 8 de Maio                                      | Instituto Adolfo Lutz, Interdisciplinary Procedures Center, Strategic Laboratory | Claudio Tavares Sacchi, Claudia Regina Gonçalves, Erica Valessa Ramos Gomes, Karoline Rodrigues Campos                                                                                                                                                                                          |
| EPI_ISL_693230                                 | Hospital e Pronto Socorro Portinari                     | Instituto Adolfo Lutz, Interdisciplinary Procedures Center, Strategic Laboratory | Claudio Tavares Sacchi, Claudia Regina Gonçalves, Erica Valessa Ramos Gomes, Karoline Rodrigues Campos                                                                                                                                                                                          |
| EPI_ISL_693231                                 | Pronto Socorro Municipal de Santa Branca                | Instituto Adolfo Lutz, Interdisciplinary Procedures Center, Strategic Laboratory | Claudio Tavares Sacchi, Claudia Regina Gonçalves, Erica Valessa Ramos Gomes, Karoline Rodrigues Campos                                                                                                                                                                                          |
| EPI_ISL_693232                                 | Hospital e Pronto Socorro Portinari                     | Instituto Adolfo Lutz, Interdisciplinary Procedures Center, Strategic Laboratory | Claudio Tavares Sacchi, Claudia Regina Gonçalves, Erica Valessa Ramos Gomes, Karoline Rodrigues Campos                                                                                                                                                                                          |
| EPI_ISL_693233                                 | Hospital Santa Cruz                                     | Instituto Adolfo Lutz, Interdisciplinary Procedures Center, Strategic Laboratory | Claudio Tavares Sacchi, Claudia Regina Gonçalves, Erica Valessa Ramos Gomes, Karoline Rodrigues Campos                                                                                                                                                                                          |
| EPI_ISL_693234                                 | Upa Vereador Jose Da Rocha Goncalves                    | Instituto Adolfo Lutz, Interdisciplinary Procedures Center, Strategic Laboratory | Claudio Tavares Sacchi, Claudia Regina Gonçalves, Erica Valessa Ramos Gomes, Karoline Rodrigues Campos                                                                                                                                                                                          |
| EPI_ISL_693235                                 | Casmi Centro Atendimento Saude da Mulher e Infancia     | Instituto Adolfo Lutz, Interdisciplinary Procedures Center, Strategic Laboratory | Claudio Tavares Sacchi, Claudia Regina Gonçalves, Erica Valessa Ramos Gomes, Karoline Rodrigues Campos                                                                                                                                                                                          |
| EPI_ISL_693236                                 | Hospital Santa Marcelina Sao Paulo                      | Instituto Adolfo Lutz, Interdisciplinary Procedures Center, Strategic Laboratory | Claudio Tavares Sacchi, Claudia Regina Gonçalves, Erica Valessa Ramos Gomes, Karoline Rodrigues Campos                                                                                                                                                                                          |
| EPI_ISL_693237                                 | UPA Santa Isabel                                        | Instituto Adolfo Lutz, Interdisciplinary Procedures Center, Strategic Laboratory | Claudio Tavares Sacchi, Claudia Regina Gonçalves, Erica Valessa Ramos Gomes, Karoline Rodrigues Campos                                                                                                                                                                                          |
| EPI_ISL_693238, EPI_ISL_693239                 | Secao Centro de Diagnostico Secedi                      | Instituto Adolfo Lutz, Interdisciplinary Procedures Center, Strategic Laboratory | Claudio Tavares Sacchi, Claudia Regina Gonçalves, Erica Valessa Ramos Gomes, Karoline Rodrigues Campos                                                                                                                                                                                          |
| EPI_ISL_693240                                 | Centro de Vigilância a Saude de Diadema                 | Instituto Adolfo Lutz, Interdisciplinary Procedures Center, Strategic Laboratory | Claudio Tavares Sacchi, Claudia Regina Gonçalves, Erica Valessa Ramos Gomes, Karoline Rodrigues Campos                                                                                                                                                                                          |
| EPI_ISL_693241                                 | Hospital e Maternidade Sao Lucas                        | Instituto Adolfo Lutz, Interdisciplinary Procedures Center, Strategic Laboratory | Claudio Tavares Sacchi, Claudia Regina Gonçalves, Erica Valessa Ramos Gomes, Karoline Rodrigues Campos                                                                                                                                                                                          |
| EPI_ISL_693242                                 | Centro de Vigilância a Saude de Diadema                 | Instituto Adolfo Lutz, Interdisciplinary Procedures Center, Strategic Laboratory | Claudio Tavares Sacchi, Claudia Regina Gonçalves, Erica Valessa Ramos Gomes, Karoline Rodrigues Campos                                                                                                                                                                                          |
| EPI_ISL_693243                                 | Laboratório Municipal de Piracicaba                     | Instituto Adolfo Lutz, Interdisciplinary Procedures Center, Strategic Laboratory | Claudio Tavares Sacchi, Claudia Regina Gonçalves, Erica Valessa Ramos Gomes, Karoline Rodrigues Campos                                                                                                                                                                                          |
| EPI_ISL_693244                                 | Centro Médico da Polícia Militar do Estado de Sao Paulo | Instituto Adolfo Lutz, Interdisciplinary Procedures Center, Strategic Laboratory | Claudio Tavares Sacchi, Claudia Regina Gonçalves, Erica Valessa Ramos Gomes, Karoline Rodrigues Campos                                                                                                                                                                                          |
| EPI_ISL_693245                                 | UPA Santa Isabel                                        | Instituto Adolfo Lutz, Interdisciplinary Procedures Center, Strategic Laboratory | Claudio Tavares Sacchi, Claudia Regina Gonçalves, Erica Valessa Ramos Gomes, Karoline Rodrigues Campos                                                                                                                                                                                          |
| EPI_ISL_693257, EPI_ISL_693278                 | unknown                                                 | Public Health Virology Laboratory, Forensic and Scientific Services (PHV-FSS)    | Son Nguyen et al.                                                                                                                                                                                                                                                                               |
| EPI_ISL_708530                                 | Secretaria Municipal de Saude de Fernandópolis          | Instituto Adolfo Lutz, Interdisciplinary Procedures Center, Strategic Laboratory | Claudio Tavares Sacchi, Claudia Regina Gonçalves, Erica Valessa Ramos Gomes, Carlos Henrique Camargo, Karoline Rodrigues Campos, Fernanda Modesto Tolentino Binhardi, Maricelia Navarro Pinheiro Flores, Marcia Maria Costa Nunes Soares, Janaina Other Martins Montanha                        |
| EPI_ISL_708745                                 | PathWest Laboratory Medicine WA                         | PathWest Laboratory Medicine WA Microbial Surveillance Unit                      | PathWest Laboratory Medicine WA Microbial Surveillance Unit                                                                                                                                                                                                                                     |
| EPI_ISL_717787, EPI_ISL_717794, EPI_ISL_717798 | LACEN RJ - Noel Nutels                                  | Bioinformatics Laboratory / LNCC                                                 | Carolina M Voloch, Ronaldo da Silva F Jr, Luiz G P de Almeida, Cynthia C Cardoso, Otavio Bustrolini, Alexandra L Gerber, Ana Paula de C Guimarães, Diana Mariani, Andréa Cony Cavalcanti, Claudia dos Santos Rodrigues, Terezinha M P P Castifeira, Amílcar Tanuri, Ana Tereza R de Vasconcelos |

|                                                                                                                                                                                                                                                                                                                                                                                                                                                                                                                                                                                                                                                                                                                                                                                                                                                                                                                                                                                                                                                                                                                                                                                                                                                                                                                                                                                                                                                                                                                                                                                                                                                                                |           |                                                                                                  |                                                                                                  |                                                                                                                                                                                                                                                                                                                                                                                          |
|--------------------------------------------------------------------------------------------------------------------------------------------------------------------------------------------------------------------------------------------------------------------------------------------------------------------------------------------------------------------------------------------------------------------------------------------------------------------------------------------------------------------------------------------------------------------------------------------------------------------------------------------------------------------------------------------------------------------------------------------------------------------------------------------------------------------------------------------------------------------------------------------------------------------------------------------------------------------------------------------------------------------------------------------------------------------------------------------------------------------------------------------------------------------------------------------------------------------------------------------------------------------------------------------------------------------------------------------------------------------------------------------------------------------------------------------------------------------------------------------------------------------------------------------------------------------------------------------------------------------------------------------------------------------------------|-----------|--------------------------------------------------------------------------------------------------|--------------------------------------------------------------------------------------------------|------------------------------------------------------------------------------------------------------------------------------------------------------------------------------------------------------------------------------------------------------------------------------------------------------------------------------------------------------------------------------------------|
| EPI_ISL_717807, EPI_ISL_717808, EPI_ISL_717810, EPI_ISL_717811, EPI_ISL_717812, EPI_ISL_717813, EPI_ISL_717814, EPI_ISL_717815, EPI_ISL_717818, EPI_ISL_717819, EPI_ISL_717820, EPI_ISL_717821, EPI_ISL_717822, EPI_ISL_717823, EPI_ISL_717825, EPI_ISL_717826, EPI_ISL_717827, EPI_ISL_717828, EPI_ISL_717829, EPI_ISL_717830, EPI_ISL_717921, EPI_ISL_717922, EPI_ISL_717924, EPI_ISL_717925, EPI_ISL_717926, EPI_ISL_717927, EPI_ISL_717928, EPI_ISL_717929, EPI_ISL_717931, EPI_ISL_717932, EPI_ISL_717933, EPI_ISL_717934, EPI_ISL_717935, EPI_ISL_717936, EPI_ISL_717937, EPI_ISL_717939, EPI_ISL_717940, EPI_ISL_717942, EPI_ISL_717944, EPI_ISL_717945, EPI_ISL_717946, EPI_ISL_717947, EPI_ISL_717948, EPI_ISL_717949, EPI_ISL_717950, EPI_ISL_717951, EPI_ISL_717952, EPI_ISL_717953, EPI_ISL_717954, EPI_ISL_717955, EPI_ISL_717956, EPI_ISL_717957                                                                                                                                                                                                                                                                                                                                                                                                                                                                                                                                                                                                                                                                                                                                                                                                                 | see above | Laboratório de Virologia Molecular / UFRJ                                                        | Bioinformatics Laboratory / LNCC                                                                 | Carolina M Voloch, Ronaldo da Silva F Jr, Luiz G P de Almeida, Cynthia C Cardoso, Otavio Bustrolini, Alexandra L Gerber, Ana Paula de C Guimarães, Diana Mariani, Andréa Cony Cavalcanti, Claudia dos Santos Rodrigues, Terezinha M P P Castifeira, Amílcar Tanuri, Ana Tereza R de Vasconcelos                                                                                          |
| EPI_ISL_718344                                                                                                                                                                                                                                                                                                                                                                                                                                                                                                                                                                                                                                                                                                                                                                                                                                                                                                                                                                                                                                                                                                                                                                                                                                                                                                                                                                                                                                                                                                                                                                                                                                                                 |           | Lighthouse Lab in Cambridge                                                                      | Wellcome Sanger Institute for the COVID-19 Genomics UK (COG-UK) Consortium                       | Rob Howes, The Lighthouse Lab in Cambridge and Alex Alderton, Roberto Amato, Sonia Goncalves, Ewan Harrison, David K. Jackson, Ian Johnston, Dominic Kwiatkowski, Cordelia Langford, John Sillitoe on behalf of the Wellcome Sanger Institute COVID-19 Surveillance Team                                                                                                                 |
| EPI_ISL_721570, EPI_ISL_721601                                                                                                                                                                                                                                                                                                                                                                                                                                                                                                                                                                                                                                                                                                                                                                                                                                                                                                                                                                                                                                                                                                                                                                                                                                                                                                                                                                                                                                                                                                                                                                                                                                                 |           | Pathogen Genomics Center, National Institute of Infectious Diseases                              | Pathogen Genomics Center, National Institute of Infectious Diseases                              | Tsuyoshi Sekizuka, Kentaro Itokawa, Rina Tanaka, Masanori Hashino, Makoto Kuroda                                                                                                                                                                                                                                                                                                         |
| EPI_ISL_721987, EPI_ISL_721988, EPI_ISL_721990, EPI_ISL_721993, EPI_ISL_721994, EPI_ISL_721995, EPI_ISL_721996, EPI_ISL_721999, EPI_ISL_722002, EPI_ISL_722004, EPI_ISL_722005, EPI_ISL_722006, EPI_ISL_722007, EPI_ISL_722009, EPI_ISL_722010, EPI_ISL_722011, EPI_ISL_722012, EPI_ISL_722013, EPI_ISL_722014, EPI_ISL_722016, EPI_ISL_722017, EPI_ISL_722018, EPI_ISL_722019, EPI_ISL_722020, EPI_ISL_722022, EPI_ISL_722023, EPI_ISL_722024, EPI_ISL_722026, EPI_ISL_722027, EPI_ISL_722029, EPI_ISL_722031, EPI_ISL_722032, EPI_ISL_722033, EPI_ISL_722034, EPI_ISL_722036, EPI_ISL_722037, EPI_ISL_722038, EPI_ISL_722040, EPI_ISL_722044, EPI_ISL_722045, EPI_ISL_722046, EPI_ISL_722047, EPI_ISL_722048, EPI_ISL_722050, EPI_ISL_722051, EPI_ISL_722052, EPI_ISL_722053, EPI_ISL_722054, EPI_ISL_722055, EPI_ISL_722057, EPI_ISL_722058, EPI_ISL_722062, EPI_ISL_722063, EPI_ISL_722064, EPI_ISL_722065, EPI_ISL_722066, EPI_ISL_722068, EPI_ISL_722069, EPI_ISL_722070, EPI_ISL_722071, EPI_ISL_722074, EPI_ISL_722075, EPI_ISL_722076, EPI_ISL_722077, EPI_ISL_722078, EPI_ISL_722079, EPI_ISL_722080, EPI_ISL_722082, EPI_ISL_722083, EPI_ISL_722084, EPI_ISL_722085, EPI_ISL_722086, EPI_ISL_722087, EPI_ISL_722089, EPI_ISL_722091, EPI_ISL_722092, EPI_ISL_722094, EPI_ISL_722097, EPI_ISL_722098, EPI_ISL_722099, EPI_ISL_722100, EPI_ISL_722101, EPI_ISL_722104, EPI_ISL_722105, EPI_ISL_722107, EPI_ISL_722108, EPI_ISL_722109, EPI_ISL_722110, EPI_ISL_722111, EPI_ISL_722113, EPI_ISL_722114, EPI_ISL_722116, EPI_ISL_722117, EPI_ISL_722118, EPI_ISL_722119, EPI_ISL_722121, EPI_ISL_722123, EPI_ISL_722124, EPI_ISL_722125, EPI_ISL_722127, EPI_ISL_722128 | see above | Hospital das Clínicas Universidade de São Paulo Medical School                                   | Laboratório de Parasitologia Médica - Instituto de Medicina Tropical - Universidade de São Paulo | Brazil-UK Centre for Arbovirus Discovery Diagnosis Genomics and Epidemiology (CADDE) Genomic Network - Instituto de Medicina Tropical                                                                                                                                                                                                                                                    |
| EPI_ISL_722131, EPI_ISL_722132, EPI_ISL_722133                                                                                                                                                                                                                                                                                                                                                                                                                                                                                                                                                                                                                                                                                                                                                                                                                                                                                                                                                                                                                                                                                                                                                                                                                                                                                                                                                                                                                                                                                                                                                                                                                                 |           | Instituto de Medicina Tropical Universidade de São Paulo                                         | Laboratório de Parasitologia Médica - Instituto de Medicina Tropical - Universidade de São Paulo | Brazil-UK Centre for Arbovirus Discovery Diagnosis Genomics and Epidemiology (CADDE) Genomic Network - Instituto de Medicina Tropical                                                                                                                                                                                                                                                    |
| EPI_ISL_722134, EPI_ISL_722135, EPI_ISL_722141, EPI_ISL_722142, EPI_ISL_722159, EPI_ISL_722162, EPI_ISL_722165                                                                                                                                                                                                                                                                                                                                                                                                                                                                                                                                                                                                                                                                                                                                                                                                                                                                                                                                                                                                                                                                                                                                                                                                                                                                                                                                                                                                                                                                                                                                                                 |           | DB Diagnosticos do Brasil                                                                        | Laboratório de Parasitologia Médica - Instituto de Medicina Tropical - Universidade de São Paulo | Brazil-UK Centre for Arbovirus Discovery Diagnosis Genomics and Epidemiology (CADDE) Genomic Network - Instituto de Medicina Tropical                                                                                                                                                                                                                                                    |
| EPI_ISL_723494                                                                                                                                                                                                                                                                                                                                                                                                                                                                                                                                                                                                                                                                                                                                                                                                                                                                                                                                                                                                                                                                                                                                                                                                                                                                                                                                                                                                                                                                                                                                                                                                                                                                 |           | Virginia Division of Consolidated Laboratory Services (DCLS)                                     | Virginia Division of Consolidated Laboratory Services (DCLS)                                     | Virginia DCLS                                                                                                                                                                                                                                                                                                                                                                            |
| EPI_ISL_728187                                                                                                                                                                                                                                                                                                                                                                                                                                                                                                                                                                                                                                                                                                                                                                                                                                                                                                                                                                                                                                                                                                                                                                                                                                                                                                                                                                                                                                                                                                                                                                                                                                                                 |           | National Public Health Laboratory, National Centre for Infectious Diseases                       | National Public Health Laboratory, National Centre for Infectious Diseases                       | Tze Minn Mak, Sophie Octavia, Zhenyang Zhou, Lin Cui, Raymond Tzer Pin Lin                                                                                                                                                                                                                                                                                                               |
| EPI_ISL_728888                                                                                                                                                                                                                                                                                                                                                                                                                                                                                                                                                                                                                                                                                                                                                                                                                                                                                                                                                                                                                                                                                                                                                                                                                                                                                                                                                                                                                                                                                                                                                                                                                                                                 |           | Viollier AG                                                                                      | Department of Biosystems Science and Engineering, ETH Zürich                                     | Chaoan Chen, Sarah Nadeau, Catharine Aquino, Ivan Topolsky, Pedro Ferreira, Philipp Jablonski, Susana Posada-Céspedes, Andreia Cabral de Gouvea, Maria Domenica Moccia, Simon Grüter, Timothy Sykes, Lennart Opitz, Ralph Schlapbach, Christiane Beckmann, Maurice Redondo, Olivier Kobel, Christoph Noppen, Sophie Seidel, Noemie Santamaria de Souza, Niko Beerenwinkel, Tanja Stadler |
| EPI_ISL_729744, EPI_ISL_729748, EPI_ISL_729754                                                                                                                                                                                                                                                                                                                                                                                                                                                                                                                                                                                                                                                                                                                                                                                                                                                                                                                                                                                                                                                                                                                                                                                                                                                                                                                                                                                                                                                                                                                                                                                                                                 |           | Connecticut Department of Health                                                                 | Grubaugh Lab - Yale School of Public Health                                                      | Joseph Fauver, Tara Alpert, Anderson Brito, Annie Watkins, Anne Wylmie, Chantal Vogels, Mary Petrone, Chaney Kalinich, Isabel Ott, Arnaud Casanovas, Catherine Muenker, Adam Moore, Alice Lu, Maria Tokuyama, Patrick Wong, Peiwen Lu, Saad Omer, Richard Martinello, Allison Nelson, Shelli Farhadian, Akiko Iwasaki, Charlese Deia Cruz, Albert Ko, Nathan Grubaugh                    |
| EPI_ISL_729799, EPI_ISL_729801, EPI_ISL_729803, EPI_ISL_729805, EPI_ISL_729806, EPI_ISL_729808, EPI_ISL_729813, EPI_ISL_729840, EPI_ISL_729852, EPI_ISL_729853, EPI_ISL_729854, EPI_ISL_729856, EPI_ISL_729861                                                                                                                                                                                                                                                                                                                                                                                                                                                                                                                                                                                                                                                                                                                                                                                                                                                                                                                                                                                                                                                                                                                                                                                                                                                                                                                                                                                                                                                                 | see above | Laboratorio Central de Saude Publica do Estado do Rio Grande do Sul (LACEN-RS)                   | Laboratory of Respiratory Viruses and Measles, Oswaldo Cruz Institute, FIOCRUZ                   | Paola Resende, Luciana Appolinario, Fernando Motta, Anna Carolina Paixão, Ana Carolina Mendonça, Tatiana Schaffer Gregianini, Marilda Tereza Mar da Rosa, Marilda Siqueira                                                                                                                                                                                                               |
| EPI_ISL_730661, EPI_ISL_731736                                                                                                                                                                                                                                                                                                                                                                                                                                                                                                                                                                                                                                                                                                                                                                                                                                                                                                                                                                                                                                                                                                                                                                                                                                                                                                                                                                                                                                                                                                                                                                                                                                                 |           | Lighthouse Lab in Alderley Park                                                                  | Wellcome Sanger Institute for the COVID-19 Genomics UK (COG-UK) Consortium                       | Jacquelyn Wynn, Mairead Hyland, The Lighthouse Lab in Alderley Park and Alex Alderton, Roberto Amato, Sonia Goncalves, Ewan Harrison, David K. Jackson, Ian Johnston, Dominic Kwiatkowski, Cordelia Langford, John Sillitoe on behalf of the Wellcome Sanger Institute COVID-19 Surveillance Team                                                                                        |
| EPI_ISL_732044, EPI_ISL_732052                                                                                                                                                                                                                                                                                                                                                                                                                                                                                                                                                                                                                                                                                                                                                                                                                                                                                                                                                                                                                                                                                                                                                                                                                                                                                                                                                                                                                                                                                                                                                                                                                                                 |           | Instituto Nacional de Saude (INSA)                                                               | Instituto Nacional de Saude (INSA)                                                               | Borges et al                                                                                                                                                                                                                                                                                                                                                                             |
| EPI_ISL_732179, EPI_ISL_732180, EPI_ISL_732181, EPI_ISL_732183, EPI_ISL_732184, EPI_ISL_732252                                                                                                                                                                                                                                                                                                                                                                                                                                                                                                                                                                                                                                                                                                                                                                                                                                                                                                                                                                                                                                                                                                                                                                                                                                                                                                                                                                                                                                                                                                                                                                                 |           | Instituto Nacional de Saude (INSA) and Instituto Gulbenkian de Ciencia (IGC)                     | Instituto Nacional de Saude (INSA) and Instituto Gulbenkian de Ciencia (IGC)                     | Borges et al                                                                                                                                                                                                                                                                                                                                                                             |
| EPI_ISL_732455                                                                                                                                                                                                                                                                                                                                                                                                                                                                                                                                                                                                                                                                                                                                                                                                                                                                                                                                                                                                                                                                                                                                                                                                                                                                                                                                                                                                                                                                                                                                                                                                                                                                 |           | National Virus Reference Laboratory                                                              | National Virus Reference Laboratory                                                              | Michael Carr, Gabriel Gonzalez, Jonathan Dean, Daniel Hare, Cillian F De Gascun                                                                                                                                                                                                                                                                                                          |
| EPI_ISL_732856, EPI_ISL_732909, EPI_ISL_732914                                                                                                                                                                                                                                                                                                                                                                                                                                                                                                                                                                                                                                                                                                                                                                                                                                                                                                                                                                                                                                                                                                                                                                                                                                                                                                                                                                                                                                                                                                                                                                                                                                 |           | genXone SA, Molecular Diagnostics Laboratory / NZOZ                                              | genXone SA, Research & Development Laboratory                                                    | Maciej Sykulski, Grzegorz Nowicki, Monika Makowska-Woniak, Jakub Grabowski, Natalia Drwska-Matelska, ukasz Krych, Micha Kaszuba                                                                                                                                                                                                                                                          |
| EPI_ISL_733121                                                                                                                                                                                                                                                                                                                                                                                                                                                                                                                                                                                                                                                                                                                                                                                                                                                                                                                                                                                                                                                                                                                                                                                                                                                                                                                                                                                                                                                                                                                                                                                                                                                                 |           | HELIX LLC                                                                                        | WHO National Influenza Centre Russian Federation                                                 | Andrey Komissarov, Artem Fadeev, Anna Ivanova, Kseniya Komissarova, Dmitry Bazhenov, Daria Danilenko, Ksenia Safina, Elena Nabieva, Georgii Bazynkin, Dmitry Lioznov                                                                                                                                                                                                                     |
| EPI_ISL_733300                                                                                                                                                                                                                                                                                                                                                                                                                                                                                                                                                                                                                                                                                                                                                                                                                                                                                                                                                                                                                                                                                                                                                                                                                                                                                                                                                                                                                                                                                                                                                                                                                                                                 |           | WHO National Influenza Centre Russian Federation                                                 | WHO National Influenza Centre Russian Federation                                                 | Andrey Komissarov, Artem Fadeev, Anna Ivanova, Kseniya Komissarova, Dmitry Bazhenov, Daria Danilenko, Ksenia Safina, Elena Nabieva, Georgii Bazynkin, Dmitry Lioznov                                                                                                                                                                                                                     |
| EPI_ISL_734865                                                                                                                                                                                                                                                                                                                                                                                                                                                                                                                                                                                                                                                                                                                                                                                                                                                                                                                                                                                                                                                                                                                                                                                                                                                                                                                                                                                                                                                                                                                                                                                                                                                                 |           | UZ Leuven, National Reference Laboratory for Coronaviruses, Laboratory Medicine, Leuven, Belgium | KU Leuven, Rega Institute, Clinical and Epidemiological Virology                                 | Tony Wawina-Bokalanga, Joan Marti-Carerras, Bert Vanmechelen, Piet Maes                                                                                                                                                                                                                                                                                                                  |
| EPI_ISL_735396                                                                                                                                                                                                                                                                                                                                                                                                                                                                                                                                                                                                                                                                                                                                                                                                                                                                                                                                                                                                                                                                                                                                                                                                                                                                                                                                                                                                                                                                                                                                                                                                                                                                 |           | Hospital de Camplanha COVID 19 SER                                                               | Instituto Adolfo Lutz, Interdisciplinary Procedures Center, Strategic Laboratory                 | Claudio Tavares Sacchi, Claudia Regina Gonçalves, Erica Valessa Ramos Gomes, Karoline Rodrigues Campos                                                                                                                                                                                                                                                                                   |
| EPI_ISL_735397                                                                                                                                                                                                                                                                                                                                                                                                                                                                                                                                                                                                                                                                                                                                                                                                                                                                                                                                                                                                                                                                                                                                                                                                                                                                                                                                                                                                                                                                                                                                                                                                                                                                 |           | Unidade Respiratória Nova Hortolandia                                                            | Instituto Adolfo Lutz, Interdisciplinary Procedures Center, Strategic Laboratory                 | Claudio Tavares Sacchi, Claudia Regina Gonçalves, Erica Valessa Ramos Gomes, Karoline Rodrigues Campos                                                                                                                                                                                                                                                                                   |
| EPI_ISL_735398                                                                                                                                                                                                                                                                                                                                                                                                                                                                                                                                                                                                                                                                                                                                                                                                                                                                                                                                                                                                                                                                                                                                                                                                                                                                                                                                                                                                                                                                                                                                                                                                                                                                 |           | Laboratorio Fleury                                                                               | Instituto Adolfo Lutz, Interdisciplinary Procedures Center, Strategic Laboratory                 | Claudio Tavares Sacchi, Claudia Regina Gonçalves, Erica Valessa Ramos Gomes, Karoline Rodrigues Campos                                                                                                                                                                                                                                                                                   |
| EPI_ISL_735399                                                                                                                                                                                                                                                                                                                                                                                                                                                                                                                                                                                                                                                                                                                                                                                                                                                                                                                                                                                                                                                                                                                                                                                                                                                                                                                                                                                                                                                                                                                                                                                                                                                                 |           | Hospital Municipal Dr Ignacio de gouvea                                                          | Instituto Adolfo Lutz, Interdisciplinary Procedures Center, Strategic Laboratory                 | Claudio Tavares Sacchi, Claudia Regina Gonçalves, Erica Valessa Ramos Gomes, Karoline Rodrigues Campos                                                                                                                                                                                                                                                                                   |
| EPI_ISL_735400                                                                                                                                                                                                                                                                                                                                                                                                                                                                                                                                                                                                                                                                                                                                                                                                                                                                                                                                                                                                                                                                                                                                                                                                                                                                                                                                                                                                                                                                                                                                                                                                                                                                 |           | Instituto Adolfo Lutz - Regional de Santos                                                       | Instituto Adolfo Lutz, Interdisciplinary Procedures Center, Strategic Laboratory                 | Claudio Tavares Sacchi, Claudia Regina Gonçalves, Erica Valessa Ramos Gomes, Karoline Rodrigues Campos                                                                                                                                                                                                                                                                                   |
| EPI_ISL_735401, EPI_ISL_735402, EPI_ISL_735403, EPI_ISL_735404                                                                                                                                                                                                                                                                                                                                                                                                                                                                                                                                                                                                                                                                                                                                                                                                                                                                                                                                                                                                                                                                                                                                                                                                                                                                                                                                                                                                                                                                                                                                                                                                                 |           | Instituto Adolfo Lutz - Regional de Rio Claro                                                    | Instituto Adolfo Lutz, Interdisciplinary Procedures Center, Strategic Laboratory                 | Claudio Tavares Sacchi, Claudia Regina Gonçalves, Erica Valessa Ramos Gomes, Karoline Rodrigues Campos                                                                                                                                                                                                                                                                                   |
| EPI_ISL_735406                                                                                                                                                                                                                                                                                                                                                                                                                                                                                                                                                                                                                                                                                                                                                                                                                                                                                                                                                                                                                                                                                                                                                                                                                                                                                                                                                                                                                                                                                                                                                                                                                                                                 |           | Unidade de Pronto Atendimento UPA I Sta Isabel                                                   | Instituto Adolfo Lutz, Interdisciplinary Procedures Center, Strategic Laboratory                 | Claudio Tavares Sacchi, Claudia Regina Gonçalves, Erica Valessa Ramos Gomes, Karoline Rodrigues Campos                                                                                                                                                                                                                                                                                   |
| EPI_ISL_735408                                                                                                                                                                                                                                                                                                                                                                                                                                                                                                                                                                                                                                                                                                                                                                                                                                                                                                                                                                                                                                                                                                                                                                                                                                                                                                                                                                                                                                                                                                                                                                                                                                                                 |           | COVID 19 Centro de Combate ao Coronavirus CCC Jandira                                            | Instituto Adolfo Lutz, Interdisciplinary Procedures Center, Strategic Laboratory                 | Claudio Tavares Sacchi, Claudia Regina Gonçalves, Erica Valessa Ramos Gomes, Karoline Rodrigues Campos                                                                                                                                                                                                                                                                                   |
| EPI_ISL_735409                                                                                                                                                                                                                                                                                                                                                                                                                                                                                                                                                                                                                                                                                                                                                                                                                                                                                                                                                                                                                                                                                                                                                                                                                                                                                                                                                                                                                                                                                                                                                                                                                                                                 |           | Unidade de Pronto Atendimento Carlos Lourenco                                                    | Instituto Adolfo Lutz, Interdisciplinary Procedures Center, Strategic Laboratory                 | Claudio Tavares Sacchi, Claudia Regina Gonçalves, Erica Valessa Ramos Gomes, Karoline Rodrigues Campos                                                                                                                                                                                                                                                                                   |
| EPI_ISL_735411                                                                                                                                                                                                                                                                                                                                                                                                                                                                                                                                                                                                                                                                                                                                                                                                                                                                                                                                                                                                                                                                                                                                                                                                                                                                                                                                                                                                                                                                                                                                                                                                                                                                 |           | Centro de Vigilancia a Saude de Diadema                                                          | Instituto Adolfo Lutz, Interdisciplinary Procedures Center, Strategic Laboratory                 | Claudio Tavares Sacchi, Claudia Regina Gonçalves, Erica Valessa Ramos Gomes, Karoline Rodrigues Campos                                                                                                                                                                                                                                                                                   |
| EPI_ISL_735412                                                                                                                                                                                                                                                                                                                                                                                                                                                                                                                                                                                                                                                                                                                                                                                                                                                                                                                                                                                                                                                                                                                                                                                                                                                                                                                                                                                                                                                                                                                                                                                                                                                                 |           | Hospital e Pronto Socorro Portinari                                                              | Instituto Adolfo Lutz, Interdisciplinary Procedures Center, Strategic Laboratory                 | Claudio Tavares Sacchi, Claudia Regina Gonçalves, Erica Valessa Ramos Gomes, Karoline Rodrigues Campos                                                                                                                                                                                                                                                                                   |
| EPI_ISL_735413                                                                                                                                                                                                                                                                                                                                                                                                                                                                                                                                                                                                                                                                                                                                                                                                                                                                                                                                                                                                                                                                                                                                                                                                                                                                                                                                                                                                                                                                                                                                                                                                                                                                 |           | Militello Centro de Diagnosticos e Biopesquisa Clínica                                           | Instituto Adolfo Lutz, Interdisciplinary Procedures Center,                                      | Claudio Tavares Sacchi, Claudia Regina Gonçalves, Erica Valessa Ramos Gomes, Karoline Rodrigues Campos                                                                                                                                                                                                                                                                                   |

| EPI_ISL ID                                                                     | Organization                                                                                                                           | Location                                                                                                                               | Principal Investigator(s)                                                                                                                                                                                                                                                                                                                                                                                                                                                                                                                                                                                                                           |
|--------------------------------------------------------------------------------|----------------------------------------------------------------------------------------------------------------------------------------|----------------------------------------------------------------------------------------------------------------------------------------|-----------------------------------------------------------------------------------------------------------------------------------------------------------------------------------------------------------------------------------------------------------------------------------------------------------------------------------------------------------------------------------------------------------------------------------------------------------------------------------------------------------------------------------------------------------------------------------------------------------------------------------------------------|
| EPI_ISL_735417                                                                 | Unidade de Pronto Atendimento de Agenor de Campos                                                                                      | Instituto Adolfo Lutz, Interdisciplinary Procedures Center, Strategic Laboratory                                                       | Claudio Tavares Sacchi, Claudia Regina Gonçalves, Erica Valessa Ramos Gomes, Karoline Rodrigues Campos                                                                                                                                                                                                                                                                                                                                                                                                                                                                                                                                              |
| EPI_ISL_735419                                                                 | UBS Alvarenga                                                                                                                          | Instituto Adolfo Lutz, Interdisciplinary Procedures Center, Strategic Laboratory                                                       | Claudio Tavares Sacchi, Claudia Regina Gonçalves, Erica Valessa Ramos Gomes, Karoline Rodrigues Campos                                                                                                                                                                                                                                                                                                                                                                                                                                                                                                                                              |
| EPI_ISL_735421                                                                 | UBS Sta Terezinha                                                                                                                      | Instituto Adolfo Lutz, Interdisciplinary Procedures Center, Strategic Laboratory                                                       | Claudio Tavares Sacchi, Claudia Regina Gonçalves, Erica Valessa Ramos Gomes, Karoline Rodrigues Campos                                                                                                                                                                                                                                                                                                                                                                                                                                                                                                                                              |
| EPI_ISL_735422                                                                 | UBS Dematchi                                                                                                                           | Instituto Adolfo Lutz, Interdisciplinary Procedures Center, Strategic Laboratory                                                       | Claudio Tavares Sacchi, Claudia Regina Gonçalves, Erica Valessa Ramos Gomes, Karoline Rodrigues Campos                                                                                                                                                                                                                                                                                                                                                                                                                                                                                                                                              |
| EPI_ISL_735423, EPI_ISL_735424, EPI_ISL_735426                                 | Centro de Vigilancia a Saude de Diadema                                                                                                | Instituto Adolfo Lutz, Interdisciplinary Procedures Center, Strategic Laboratory                                                       | Claudio Tavares Sacchi, Claudia Regina Gonçalves, Erica Valessa Ramos Gomes, Karoline Rodrigues Campos                                                                                                                                                                                                                                                                                                                                                                                                                                                                                                                                              |
| EPI_ISL_735428, EPI_ISL_735429, EPI_ISL_735431                                 | Hospital Nipo Brasileiro                                                                                                               | Instituto Adolfo Lutz, Interdisciplinary Procedures Center, Strategic Laboratory                                                       | Claudio Tavares Sacchi, Claudia Regina Gonçalves, Erica Valessa Ramos Gomes, Karoline Rodrigues Campos                                                                                                                                                                                                                                                                                                                                                                                                                                                                                                                                              |
| EPI_ISL_735433                                                                 | Posto de Atendimento Saude Cidade Pasc Cajati                                                                                          | Instituto Adolfo Lutz, Interdisciplinary Procedures Center, Strategic Laboratory                                                       | Claudio Tavares Sacchi, Claudia Regina Gonçalves, Erica Valessa Ramos Gomes, Karoline Rodrigues Campos                                                                                                                                                                                                                                                                                                                                                                                                                                                                                                                                              |
| EPI_ISL_736895, EPI_ISL_736906                                                 | Pathogen Genomics Center, National Institute of Infectious Diseases                                                                    | Pathogen Genomics Center, National Institute of Infectious Diseases                                                                    | Tsuyoshi Sekizuka, Kentaro Itokawa, Rina Tanaka, Masanori Hashino, Makoto Kuroda                                                                                                                                                                                                                                                                                                                                                                                                                                                                                                                                                                    |
| EPI_ISL_741517                                                                 | Quadram Institute Bioscience                                                                                                           | COVID-19 Genomics UK (COG-UK) Consortium                                                                                               | Dave J. Baker, Gemma L. Kay, Alp Aydin, Thanh Le-Viet, Steven Rudder, Ana P. Tedim, Anastasia Kolyva, Maria Diaz, Leonardo de Oliveira Martins, Nabil-Fareed Alikhan, Lizzie Meadows, Rachael Stanley, Ngozi Elumogo, Muhammed Yasir, Nicholas M. Thomson, Alexander J Trotter, Rachel Gilroy, Samuel Bloomfield, Claire Stuart, Andrew Bell, Reenesh Prakash, Samir Devisevic, Alison E. Mather, John Wain, Mark Webber, Andrew J. Page, Justin O'Grady                                                                                                                                                                                            |
| EPI_ISL_745827, EPI_ISL_745855                                                 | Ginkgo Bioworks Clinical Laboratory                                                                                                    | Utah Public Health Laboratory                                                                                                          | Erin L. Young, Kelly Oakeson, Tara Gallagher, Michael T. Pyne, E. Susan Slechta, Melanie A. Mallory, Jeffrey B. Stevenson, Salika M. Shakir, David R. Hillyard, Malaika McKenzie-Bennett, James McGann, Jim Griffin, Keith Robison, Alex Plocik, Becky Schilling, Martha Pierson, Rebecca Littlefield, Michelle Spencer, Birgitte Simen                                                                                                                                                                                                                                                                                                             |
| EPI_ISL_746686                                                                 | Genetica Molecular and Subdepartamento de Virologia ISP Chile                                                                          | Instituto de Salud Publica de Chile                                                                                                    | Javier Tognarelli, Barbara Parra, Loredana Arata, Jaime Lagos, Gisselle Barra, Patricia Bustos, Rodrigo Fasce, Andres Castillo, Jorge Fernandez                                                                                                                                                                                                                                                                                                                                                                                                                                                                                                     |
| EPI_ISL_747337                                                                 | Division of Emerging Infectious Diseases, Bureau of Infectious Diseases Diagnosis Control, Korea Disease Control and Prevention Agency | Division of Emerging Infectious Diseases, Bureau of Infectious Diseases Diagnosis Control, Korea Disease Control and Prevention Agency | Ae Kyung Park, Il-Hwan Kim, Heui Man Kim, Jeong-Min Kim, Namjoo Lee, Chaeyoung Lee, Sang Hee Woo, Eun-Jin Kim                                                                                                                                                                                                                                                                                                                                                                                                                                                                                                                                       |
| EPI_ISL_750175                                                                 | CENUR Este-Sede Rocha-UdelaR                                                                                                           | Institut Pasteur de Montevideo                                                                                                         | Daiana Mir, Natalia Rego, Paola Cristina Resende, Fernando Lopez-Tort, Tamara Fernandez-Calero, Veronica Noya, Mariana Brandes, Tania Possi, Mailen Arleo, Natalia Reyes, Matias Victoria, Andres Lizasoain, Matias Castells, Leticia Maya, Matias Salvo, Tatiana Schäffer Gregianini, Marilda Tereza Mar da Rosa, Leticia Garay Martins, Cecilia Alonso, Yasser Vega, Cecilia Salazar, Ignacio Ferrés, Pablo Smircich, Jose Sotelo, Ighor Arantes, Luciana Appolinario, Ana Carolina Mendonça, Maria Jose Benitez-Galeano, Martín Graña, Camila Simoes, Fernando Motta, Marilda Mendonça Siqueira, Gonzalo Bello, Rodney Colina, Lucia Spangenberg |
| EPI_ISL_750176, EPI_ISL_750177                                                 | Sanatorio Americano                                                                                                                    | Institut Pasteur de Montevideo                                                                                                         | Daiana Mir, Natalia Rego, Paola Cristina Resende, Fernando Lopez-Tort, Tamara Fernandez-Calero, Veronica Noya, Mariana Brandes, Tania Possi, Mailen Arleo, Natalia Reyes, Matias Victoria, Andres Lizasoain, Matias Castells, Leticia Maya, Matias Salvo, Tatiana Schäffer Gregianini, Marilda Tereza Mar da Rosa, Leticia Garay Martins, Cecilia Alonso, Yasser Vega, Cecilia Salazar, Ignacio Ferrés, Pablo Smircich, Jose Sotelo, Ighor Arantes, Luciana Appolinario, Ana Carolina Mendonça, Maria Jose Benitez-Galeano, Martín Graña, Camila Simoes, Fernando Motta, Marilda Mendonça Siqueira, Gonzalo Bello, Rodney Colina, Lucia Spangenberg |
| EPI_ISL_751184, EPI_ISL_751185, EPI_ISL_751186, EPI_ISL_751189, EPI_ISL_751190 | CENUR Litoral Norte - UdelaR, Salto, Uruguay                                                                                           | Institut Pasteur de Montevideo                                                                                                         | Daiana Mir, Natalia Rego, Paola Cristina Resende, Fernando Lopez-Tort, Tamara Fernandez-Calero, Veronica Noya, Mariana Brandes, Tania Possi, Mailen Arleo, Natalia Reyes, Matias Victoria, Andres Lizasoain, Matias Castells, Leticia Maya, Matias Salvo, Tatiana Schäffer Gregianini, Marilda Tereza Mar da Rosa, Leticia Garay Martins, Cecilia Alonso, Yasser Vega, Cecilia Salazar, Ignacio Ferrés, Pablo Smircich, Jose Sotelo, Ighor Arantes, Luciana Appolinario, Ana Carolina Mendonça, Maria Jose Benitez-Galeano, Martín Graña, Camila Simoes, Fernando Motta, Marilda Mendonça Siqueira, Gonzalo Bello, Rodney Colina, Lucia Spangenberg |
| EPI_ISL_751201                                                                 | Laboratorio DILAVE/MGAP-INIA-UdelaR -Tacuarembó                                                                                        | Institut Pasteur de Montevideo                                                                                                         | Daiana Mir, Natalia Rego, Paola Cristina Resende, Fernando Lopez-Tort, Tamara Fernandez-Calero, Veronica Noya, Mariana Brandes, Tania Possi, Mailen Arleo, Natalia Reyes, Matias Victoria, Andres Lizasoain, Matias Castells, Leticia Maya, Matias Salvo, Tatiana Schäffer Gregianini, Marilda Tereza Mar da Rosa, Leticia Garay Martins, Cecilia Alonso, Yasser Vega, Cecilia Salazar, Ignacio Ferrés, Pablo Smircich, Jose Sotelo, Ighor Arantes, Luciana Appolinario, Ana Carolina Mendonça, Maria Jose Benitez-Galeano, Martín Graña, Camila Simoes, Fernando Motta, Marilda Mendonça Siqueira, Gonzalo Bello, Rodney Colina, Lucia Spangenberg |
| EPI_ISL_754079                                                                 | National Public Health Laboratory, National Centre for Infectious Diseases                                                             | National Public Health Laboratory, National Centre for Infectious Diseases                                                             | Tze Minn Mak, Sophie Octavia, Zhenyang Zhou, Lin Cui, Raymond Tzer Pin Lin                                                                                                                                                                                                                                                                                                                                                                                                                                                                                                                                                                          |

We gratefully acknowledge the following Authors from the Originating laboratories responsible for obtaining the specimens, as well as the Submitting laboratories where the genome data were generated and shared via GISAID, on which this research is based.

All Submitters of data may be contacted directly via [www.gisaid.org](http://www.gisaid.org)

| Accession ID                   | Originating Laboratory                                                                              | Submitting Laboratory                                                                               | Authors                                                                                                                                                                                                                                                                                                                                                                                                                                                                                                                                                                                                 |
|--------------------------------|-----------------------------------------------------------------------------------------------------|-----------------------------------------------------------------------------------------------------|---------------------------------------------------------------------------------------------------------------------------------------------------------------------------------------------------------------------------------------------------------------------------------------------------------------------------------------------------------------------------------------------------------------------------------------------------------------------------------------------------------------------------------------------------------------------------------------------------------|
| EPI_ISL_468307                 | Centro de Vigilancia a Saude de Diadema                                                             | Instituto Adolfo Lutz, Interdisciplinary Procedures Center, Strategic Laboratory                    | Claudio Tavares Sacchi, Claudia Regina Gonçalves, Erica Valessa Ramos Gomes                                                                                                                                                                                                                                                                                                                                                                                                                                                                                                                             |
| EPI_ISL_468308                 | Hospital Municipal do Tatuape Carminio Caricchio                                                    | Instituto Adolfo Lutz, Interdisciplinary Procedures Center, Strategic Laboratory                    | Claudio Tavares Sacchi, Claudia Regina Gonçalves, Erica Valessa Ramos Gomes                                                                                                                                                                                                                                                                                                                                                                                                                                                                                                                             |
| EPI_ISL_468319                 | Vigilancia Epidemiologica de São Bernardo do Campo                                                  | Instituto Adolfo Lutz, Interdisciplinary Procedures Center, Strategic Laboratory                    | Claudio Tavares Sacchi, Claudia Regina Gonçalves, Erica Valessa Ramos Gomes                                                                                                                                                                                                                                                                                                                                                                                                                                                                                                                             |
| EPI_ISL_471539                 | Hospital Universitario da USP Sao Paulo                                                             | Instituto Adolfo Lutz, Interdisciplinary Procedures Center, Strategic Laboratory                    | Claudio Tavares Sacchi, Claudia Regina Gonçalves, Erica Valessa Ramos Gomes                                                                                                                                                                                                                                                                                                                                                                                                                                                                                                                             |
| EPI_ISL_471548                 | Hospital do Servidor Público Estadual Francisco Morato de Oliveira                                  | Instituto Adolfo Lutz, Interdisciplinary Procedures Center, Strategic Laboratory                    | Claudio Tavares Sacchi, Claudia Regina Gonçalves, Erica Valessa Ramos Gomes                                                                                                                                                                                                                                                                                                                                                                                                                                                                                                                             |
| EPI_ISL_476254                 | Hospital da Clínicas da Faculdade de Medicina da Universidade de São Paulo                          | Instituto de Medicina Tropical da Univesidade de São Paulo                                          | Samples: Ingra Morales Claro, Erika Regina Manuli, Cecilia Salete Alencar, Carolina S. Lazar, Sílvia F. Costa; Sequencing: Ingra Morales Claro, Jaqueline Goes de Jesus, Erika Regina Manuli, Flavia Cristina da Silva Sales, Thais de Moura Coletti, Camila Alves Maia da Silva, Mariana Severo Ramundo, Giulia Magalhaes Ferreira, Darlan da Silva Candido, Julien Theze, Nuno Faria, Ester Sabino                                                                                                                                                                                                    |
| EPI_ISL_476296                 | DB Diagnósticos do Brasil                                                                           | Instituto de Medicina Tropical da Univesidade de São Paulo                                          | Samples: Nelson Gaburo Jr; Sequencing: Ingra Morales Claro, Jaqueline Goes de Jesus, Erika Regina Manuli, Flavia Cristina da Silva Sales, Thais de Moura Coletti, Camila Alves Maia da Silva, Mariana Severo Ramundo, Giulia Magalhaes Ferreira, Darlan da Silva Candido, Julien Theze, Nuno Faria, Ester Sabino                                                                                                                                                                                                                                                                                        |
| EPI_ISL_476381, EPI_ISL_476385 | Hospital da Clínicas da Faculdade de Medicina da Universidade de São Paulo                          | Instituto de Medicina Tropical da Univesidade de São Paulo                                          | Samples: Ingra Morales Claro, Erika Regina Manuli, Cecilia Salete Alencar, Carolina S. Lazar, Sílvia F. Costa; Sequencing: Ingra Morales Claro, Jaqueline Goes de Jesus, Erika Regina Manuli, Flavia Cristina da Silva Sales, Thais de Moura Coletti, Camila Alves Maia da Silva, Mariana Severo Ramundo, Giulia Magalhaes Ferreira, Darlan da Silva Candido, Julien Theze, Nuno Faria, Ester Sabino                                                                                                                                                                                                    |
| EPI_ISL_476412                 | Laboratório de Patologia Clínica - UNICAMP                                                          | Laboratório de Estudos de Vírus Emergentes - UNICAMP                                                | José Luiz Proença-Modena, Magnun Nueldo Nunes dos Santos, Angelica Schreiber, Julia Forato, Camila Simeoni, Marcilio Jorge Fumagalli, Mariene Ribeiro Amorim, Darlan da Silva Candido, Nuno Rodrigues Faria, Julien Theze, Luiz Gonzaga, Jaqueline Goes Jesus e William Marciel de Souza                                                                                                                                                                                                                                                                                                                |
| EPI_ISL_509500                 | Area of Virology, Serology and Virology Division (SAViD), New South Wales Health Pathology Randwick | Area of Virology, Serology and Virology Division (SAViD), New South Wales Health Pathology Randwick | Rawlinson, W.                                                                                                                                                                                                                                                                                                                                                                                                                                                                                                                                                                                           |
| EPI_ISL_515545                 | Hospital Sao Paulo de Ensino da Unifesp                                                             | Instituto Adolfo Lutz, Interdisciplinary Procedures Center, Strategic Laboratory                    | Claudio Tavares Sacchi, Claudia Regina Gonçalves, Erica Valessa Ramos Gomes                                                                                                                                                                                                                                                                                                                                                                                                                                                                                                                             |
| EPI_ISL_515546                 | Hospital Municipal do Tatuape Carminio Caricchio                                                    | Instituto Adolfo Lutz, Interdisciplinary Procedures Center, Strategic Laboratory                    | Claudio Tavares Sacchi, Claudia Regina Gonçalves, Erica Valessa Ramos Gomes                                                                                                                                                                                                                                                                                                                                                                                                                                                                                                                             |
| EPI_ISL_515564                 | Hosp. Municipal Prof. Dr. Alipio Corrêa Netto                                                       | Instituto Adolfo Lutz, Interdisciplinary Procedures Center, Strategic Laboratory                    | Claudio Tavares Sacchi, Claudia Regina Gonçalves, Erica Valessa Ramos Gomes                                                                                                                                                                                                                                                                                                                                                                                                                                                                                                                             |
| EPI_ISL_523967                 | Hospital Sancta Maggiore                                                                            | Instituto Adolfo Lutz, Interdisciplinary Procedures Center, Strategic Laboratory                    | Claudio Tavares Sacchi, Claudia Regina Gonçalves, Erica Valessa Ramos Gomes                                                                                                                                                                                                                                                                                                                                                                                                                                                                                                                             |
| EPI_ISL_523985                 | Hospital Municipal Dr. Benedicto Montenegro                                                         | Instituto Adolfo Lutz, Interdisciplinary Procedures Center, Strategic Laboratory                    | Claudio Tavares Sacchi, Claudia Regina Gonçalves, Erica Valessa Ramos Gomes                                                                                                                                                                                                                                                                                                                                                                                                                                                                                                                             |
| EPI_ISL_523993                 | UPA Campo Limpo                                                                                     | Instituto Adolfo Lutz, Interdisciplinary Procedures Center, Strategic Laboratory                    | Claudio Tavares Sacchi, Claudia Regina Gonçalves, Erica Valessa Ramos Gomes                                                                                                                                                                                                                                                                                                                                                                                                                                                                                                                             |
| EPI_ISL_534324                 | Hospital Mun Ver Jose Storopoli                                                                     | Instituto Adolfo Lutz, Interdisciplinary Procedures Center, Strategic Laboratory                    | Claudio Tavares Sacchi, Claudia Regina Gonçalves, Erica Valessa Ramos Gomes                                                                                                                                                                                                                                                                                                                                                                                                                                                                                                                             |
| EPI_ISL_547576                 | Secretaria Municipal de Saúde                                                                       | Instituto Adolfo Lutz, Interdisciplinary Procedures Center, Strategic Laboratory                    | Claudio Tavares Sacchi, Claudia Regina Gonçalves, Erica Valessa Ramos Gomes, Karoline Rodrigues Campos                                                                                                                                                                                                                                                                                                                                                                                                                                                                                                  |
| EPI_ISL_574595                 | Hospital Geral de Vila Penteado Dr. Jose Pamgella                                                   | Instituto Adolfo Lutz, Interdisciplinary Procedures Center, Strategic Laboratory                    | Claudio Tavares Sacchi, Claudia Regina Gonçalves, Erica Valessa Ramos Gomes, Karoline Rodrigues Campos                                                                                                                                                                                                                                                                                                                                                                                                                                                                                                  |
| EPI_ISL_579220                 | Canterbury Health Laboratories                                                                      | Institute of Environmental Science and Research (ESR)                                               | Xiaoyun Ren, Matt Storey, Nikki Freed, Muhammad Faisal, Jing Wang, Hermes Perez, Anja Werno, Antje van der Linden, Arlo Upton, Chris Mansell, David Hammer, Dragana Drinkovic, Gary McAuliffe, Hana Sofia Andersson, James Ussher, Jill Sherwood, Josh Freeman, Julia Howard, Juliet Ely, Mary DeAlmeida, Matt Blakiston, Matthew Rogers, Max Bloomfield, Michael Addidle, Michelle Balm, Sally Roberts, Sarah Jefferies, Sharmini Muttaiyah, Susan Morpeth, Susan Taylor, Timothy Blackmore, Vani Sathyendran, Veronica Playle, Virginia Hope, Erasmus Smit, Lauren Jelly, Olin Silander, Joep de Ligt |
| EPI_ISL_579320                 | LabPLUS                                                                                             | Institute of Environmental Science and Research (ESR)                                               | Xiaoyun Ren, Matt Storey, Nikki Freed, Muhammad Faisal, Jing Wang, Hermes Perez, Anja Werno, Antje van der Linden, Arlo Upton, Chris Mansell, David Hammer, Dragana Drinkovic, Gary McAuliffe, Hana Sofia Andersson, James Ussher, Jill Sherwood, Josh Freeman, Julia Howard, Juliet Ely, Mary DeAlmeida, Matt Blakiston, Matthew Rogers, Max Bloomfield, Michael Addidle, Michelle Balm, Sally Roberts, Sarah Jefferies, Sharmini Muttaiyah, Susan Morpeth, Susan Taylor, Timothy Blackmore, Vani Sathyendran, Veronica Playle, Virginia Hope, Erasmus Smit, Lauren Jelly, Olin Silander, Joep de Ligt |
| EPI_ISL_583499                 | Distrito Sanitario Sul Campinas                                                                     | Instituto Adolfo Lutz, Interdisciplinary Procedures Center, Strategic Laboratory                    | Claudio Tavares Sacchi, Claudia Regina Gonçalves, Erica Valessa Ramos Gomes, Karoline Rodrigues Campos                                                                                                                                                                                                                                                                                                                                                                                                                                                                                                  |
| EPI_ISL_583501                 | Hospital Estadual de Campanha COVID 19 Barradas                                                     | Instituto Adolfo Lutz, Interdisciplinary Procedures Center, Strategic Laboratory                    | Claudio Tavares Sacchi, Claudia Regina Gonçalves, Erica Valessa Ramos Gomes, Karoline Rodrigues Campos                                                                                                                                                                                                                                                                                                                                                                                                                                                                                                  |
| EPI_ISL_603027                 | Santa Casa de Misericórdia de Araçatuba                                                             | Instituto Adolfo Lutz, Interdisciplinary Procedures Center, Strategic Laboratory                    | Claudio Tavares Sacchi, Claudia Regina Gonçalves, Erica Valessa Ramos Gomes, Karoline Rodrigues Campos                                                                                                                                                                                                                                                                                                                                                                                                                                                                                                  |
| EPI_ISL_603035                 | Secretaria Municipal de Saúde                                                                       | Instituto Adolfo Lutz, Interdisciplinary Procedures Center, Strategic Laboratory                    | Claudio Tavares Sacchi, Claudia Regina Gonçalves, Erica Valessa Ramos Gomes, Karoline Rodrigues Campos                                                                                                                                                                                                                                                                                                                                                                                                                                                                                                  |
| EPI_ISL_605879                 | PathWest Laboratory Medicine WA                                                                     | PathWest Laboratory Medicine WA Microbial Surveillance Unit                                         | PathWest Laboratory Medicine WA Microbial Surveillance Unit                                                                                                                                                                                                                                                                                                                                                                                                                                                                                                                                             |
| EPI_ISL_619577                 | Department of Virus and Microbiological Special                                                     | Albertsen lab, Department of Chemistry and Bioscience,                                              | Danish Covid-19 Genome Consortia                                                                                                                                                                                                                                                                                                                                                                                                                                                                                                                                                                        |



|                                                                |                                                                                                                                    |                                                                                                                                                                                      |                                                                                                                                                                                                                                                                                               |
|----------------------------------------------------------------|------------------------------------------------------------------------------------------------------------------------------------|--------------------------------------------------------------------------------------------------------------------------------------------------------------------------------------|-----------------------------------------------------------------------------------------------------------------------------------------------------------------------------------------------------------------------------------------------------------------------------------------------|
| EPI_ISL_672689, EPI_ISL_672733                                 | Diagnostics, Statens Serum Institut, Denmark                                                                                       | Aalborg University, Denmark                                                                                                                                                          | Brazil-UK Centre for Arbovirus Discovery Diagnosis Genomics and Epidemiology (CADDE) Genomic Network - Instituto de Medicina Tropical                                                                                                                                                         |
| EPI_ISL_693221                                                 | Hospital das Clínicas da Faculdade de Medicina da Universidade de São Paulo (HC-FMUSP)<br>Secretaria Municipal de Saúde de Birigui | Laboratório de Parasitologia Médica - Instituto de Medicina Tropical - Universidade de São Paulo<br>Instituto Adolfo Lutz, Interdisciplinary Procedures Center, Strategic Laboratory | Claudio Tavares Sacchi, Claudia Regina Gonçalves, Erica Valessa Ramos Gomes, Karoline Rodrigues Campos                                                                                                                                                                                        |
| EPI_ISL_717939, EPI_ISL_717954                                 | Laboratório de Virologia Molecular / UFRJ                                                                                          | Bioinformatics Laboratory / LNCC                                                                                                                                                     | Carolina M Voloch, Ronaldo da Silva F Jr, Luiz G P de Almeida, Cynthia C Cardoso, Otavio Bustroli, Alexandra L Gerber, Ana Paula de C Guimarães, Diana Mariani, Andréa Cony Cavalcanti, Claudia dos Santos Rodrigues, Terezinha M P P Castifeira, Amílcar Tanuri, Ana Tereza R de Vasconcelos |
| EPI_ISL_722012, EPI_ISL_722035, EPI_ISL_722061, EPI_ISL_722079 | Hospital das Clínicas Universidade de São Paulo Medical School                                                                     | Laboratório de Parasitologia Médica - Instituto de Medicina Tropical - Universidade de São Paulo                                                                                     | Brazil-UK Centre for Arbovirus Discovery Diagnosis Genomics and Epidemiology (CADDE) Genomic Network - Instituto de Medicina Tropical                                                                                                                                                         |
| EPI_ISL_732116                                                 | Instituto Nacional de Saude (INSA)                                                                                                 | Instituto Nacional de Saude (INSA)                                                                                                                                                   | Borges et al                                                                                                                                                                                                                                                                                  |
| EPI_ISL_735405                                                 | Secretaria Municipal de Saude de Birigui                                                                                           | Instituto Adolfo Lutz, Interdisciplinary Procedures Center, Strategic Laboratory                                                                                                     | Claudio Tavares Sacchi, Claudia Regina Gonçalves, Erica Valessa Ramos Gomes, Karoline Rodrigues Campos                                                                                                                                                                                        |
| EPI_ISL_755647                                                 | Instituto Adolfo Lutz - Regional de Santo Andre                                                                                    | Instituto Adolfo Lutz, Interdisciplinary Procedures Center, Strategic Laboratory                                                                                                     | Claudio Tavares Sacchi, Claudia Regina Gonçalves, Erica Valessa Ramos Gomes, Karoline Rodrigues Campos                                                                                                                                                                                        |
| EPI_ISL_755654                                                 | Instituto Adolfo Lutz - Central                                                                                                    | Instituto Adolfo Lutz, Interdisciplinary Procedures Center, Strategic Laboratory                                                                                                     | Claudio Tavares Sacchi, Claudia Regina Gonçalves, Erica Valessa Ramos Gomes, Karoline Rodrigues Campos                                                                                                                                                                                        |

We gratefully acknowledge the following Authors from the Originating laboratories responsible for obtaining the specimens, as well as the Submitting laboratories where the genome data were generated and shared via GISAID, on which this research is based.

All Submitters of data may be contacted directly via [www.gisaid.org](http://www.gisaid.org)

| Accession ID                                                                                                                   | Originating Laboratory                                                                | Submitting Laboratory                                                                                                              | Authors                                                                                                                                                                                                                                                                                                                                                                                                                                                                                                                                                                                                                                                                   |
|--------------------------------------------------------------------------------------------------------------------------------|---------------------------------------------------------------------------------------|------------------------------------------------------------------------------------------------------------------------------------|---------------------------------------------------------------------------------------------------------------------------------------------------------------------------------------------------------------------------------------------------------------------------------------------------------------------------------------------------------------------------------------------------------------------------------------------------------------------------------------------------------------------------------------------------------------------------------------------------------------------------------------------------------------------------|
| EPI_ISL_418371                                                                                                                 | Public Health Ontario Laboratories                                                    | Public Health Ontario Laboratories                                                                                                 | Alireza Eshaghi, Samir N Patel, Jonathan B Gubbay, Vanessa G Allen, Christine Frantz, Aimin Li, Sandeep Nagra                                                                                                                                                                                                                                                                                                                                                                                                                                                                                                                                                             |
| EPI_ISL_425171                                                                                                                 | University of Wisconsin-Madison AIDS Vaccine Research Laboratories                    | University of Wisconsin-Madison AIDS Vaccine Research Laboratories                                                                 | Gage Moreno, Katarina Braun, et al. AIDS Vaccine Research Laboratories                                                                                                                                                                                                                                                                                                                                                                                                                                                                                                                                                                                                    |
| EPI_ISL_425373                                                                                                                 | Department of Pathology, University of Cambridge                                      | COVID-19 Genomics UK (COG-UK) Consortium                                                                                           | Luke W Meredith, M. Estee Torok , Myra Hosmillo, William L. Hamilton, Martin D. Curran, Theresa Feltwell, Anna Yakovleva, Charlotte J. Houldcroft, Aminu S. Jahun, Sarah L. Caddy, Ian Goodfellow                                                                                                                                                                                                                                                                                                                                                                                                                                                                         |
| EPI_ISL_426899                                                                                                                 | Royal Darwin Hospital Pathology                                                       | Microbiological Diagnostic Unit Public Health Laboratory and Victorian Infectious Diseases Reference Laboratory, Doherty Institute | Meumann, E., Cally L., Seemann T., Sait, M., Schultz M., Druce J., Sherry, N.                                                                                                                                                                                                                                                                                                                                                                                                                                                                                                                                                                                             |
| EPI_ISL_427131                                                                                                                 | Victorian Infectious Diseases Reference Laboratory (VIDRL)                            | Microbiological Diagnostic Unit Public Health Laboratory and Victorian Infectious Diseases Reference Laboratory, Doherty Institute | Cally L., Seemann T., Sait, M., Schultz M., Druce J., Sherry, N.                                                                                                                                                                                                                                                                                                                                                                                                                                                                                                                                                                                                          |
| EPI_ISL_427294, EPI_ISL_427295, EPI_ISL_427296, EPI_ISL_427297, EPI_ISL_427298, EPI_ISL_427302, EPI_ISL_427303, EPI_ISL_427304 | Instituto Oswaldo Cruz FIOCRUZ - Laboratory of Respiratory Viruses and Measles (LVRS) | Instituto Oswaldo Cruz FIOCRUZ - Laboratory of Respiratory Viruses and Measles (LVRS)                                              | Paola Resende, Fernando Motta, Luciana Appolinario, Sunando Roy, Aline Mattos, Milene Miranda, Cristiana Garcia, Braulia Caetano, Maria Ogrzewalska, Priscila Born, Jonathan Lopes, Marilda Siqueira                                                                                                                                                                                                                                                                                                                                                                                                                                                                      |
| EPI_ISL_428294                                                                                                                 | University of Wisconsin-Madison AIDS Vaccine Research Laboratories                    | University of Wisconsin-Madison AIDS Vaccine Research Laboratories                                                                 | Gage Moreno, Katarina Braun, et al. AIDS Vaccine Research Laboratories                                                                                                                                                                                                                                                                                                                                                                                                                                                                                                                                                                                                    |
| EPI_ISL_430793                                                                                                                 | Laboratorio Análisis Clínicos, Unidad de Servicios Diagnósticos, Swiss Medical Group  | Área de Secuenciación del Laboratorio de Virología del Hospital de Niños Dr. Ricardo Gutierrez                                     | Nabaes Jodar, MS; Goya, S; Natale, MI; Lusso, S; Sanchez, O; Guevara, D; Vicario, SM; Mistchenko, AS; Valinotto, LE; Viegas, M.                                                                                                                                                                                                                                                                                                                                                                                                                                                                                                                                           |
| EPI_ISL_434803                                                                                                                 | Houston Methodist Hospital                                                            | Houston Methodist Hospital                                                                                                         | S. Wesley Long, Randall J. Olsen, Paul A. Christensen, David W. Bernard, James J. Davis, Maulik Shukla, Marcus Nguyen, Matthew Ojeda Saavedra, Concepcion C. Cantu, Prasanti Yerramilli, Layne Pruitt, Sishir Subedi, Heather Hendrickson, Ghazaleh Eskandari, Muthiah Kumaraswami, Jason S. McLellan, Hakon Jonsson, Kari Stefansson, and James M. Musser                                                                                                                                                                                                                                                                                                                |
| EPI_ISL_436853, EPI_ISL_437100                                                                                                 | Michigan Department of Health and Human Services, Bureau of Laboratories              | Michigan Department of Health and Human Services, Bureau of Laboratories                                                           | Blankenship HM, Riner D, Soehnlén MK                                                                                                                                                                                                                                                                                                                                                                                                                                                                                                                                                                                                                                      |
| EPI_ISL_437806                                                                                                                 | UW Virology Lab                                                                       | UW Virology Lab                                                                                                                    | Pavitra Roychoudhury, Hong Xie, Keith Jerome, Alexander Greninger                                                                                                                                                                                                                                                                                                                                                                                                                                                                                                                                                                                                         |
| EPI_ISL_444626                                                                                                                 | NYU Langone Health                                                                    | Departments of Pathology and Medicine, New York University School of Medicine                                                      | Maria Agueró-Rosenfeld, Brendan Belovarac, Margaret Black, Ludovic Boytard, John Cadley, Paolo Cotzia, John Chen, Dacia Dimartino, Xiaojun Feng, Tatyana Gindin, Emily Guzman, Adriana Heguy, Megan Hogan, Emily Huang, George Jour, Alireza Khodadadi-Jamayran, Lawrence H. Lin, Raven Luther, Andrew Lytle, Christian Marier, Matthew T. Maurano, Mark J. Mulligan, Peter Meyn, Raquel Ordóñez Ciriza, Iman Osman, Jared Pinnell, Vanessa Raabe, Sitharam Ramaswami, Amy Rapkiewicz, Andre M. Ribeiro-dos-Santos, Marie Samanovic-Golden, Antonio Serrano, Guomiao Shen, Matija Snuderl, Theodore Vougiouklakis, Nick Vulpescu, Gael Westby, Paul Zappile, Yutong Zhang |
| EPI_ISL_445349                                                                                                                 | HOSPITAL SAN JUAN DE DIOS                                                             | Instituto de Salud Publica de Chile                                                                                                | Andrés E Castillo, Bárbara Parra, Paz Tapia, Jaime Lagos, Loredana Arata, Alejandra Acevedo, Winston Andrade, Gabriel Leal, Carolina Tambley, Patricia Bustos, Rodrigo Fasce, Jorge Fernandez                                                                                                                                                                                                                                                                                                                                                                                                                                                                             |
| EPI_ISL_445352                                                                                                                 | HOSPITAL DEL PROFESOR                                                                 | Instituto de Salud Publica de Chile                                                                                                | Andrés E Castillo, Bárbara Parra, Paz Tapia, Jaime Lagos, Loredana Arata, Alejandra Acevedo, Winston Andrade, Gabriel Leal, Carolina Tambley, Patricia Bustos, Rodrigo Fasce, Jorge Fernandez                                                                                                                                                                                                                                                                                                                                                                                                                                                                             |
| EPI_ISL_445362                                                                                                                 | BUPA SERVICIOS CLINICOS S.A                                                           | Instituto de Salud Publica de Chile                                                                                                | Andrés E Castillo, Bárbara Parra, Paz Tapia, Jaime Lagos, Loredana Arata, Alejandra Acevedo, Winston Andrade, Gabriel Leal, Carolina Tambley, Patricia Bustos, Rodrigo Fasce, Jorge Fernandez                                                                                                                                                                                                                                                                                                                                                                                                                                                                             |
| EPI_ISL_445367                                                                                                                 | ASISTENCIA PUBLICA DR.ALEJANDRO DEL RIO                                               | Instituto de Salud Publica de Chile                                                                                                | Andrés E Castillo, Bárbara Parra, Paz Tapia, Jaime Lagos, Loredana Arata, Alejandra Acevedo, Winston Andrade, Gabriel Leal, Carolina Tambley, Patricia Bustos, Rodrigo Fasce, Jorge Fernandez                                                                                                                                                                                                                                                                                                                                                                                                                                                                             |
| EPI_ISL_445369, EPI_ISL_445370                                                                                                 | HOSPITAL DE CARABINEROS                                                               | Instituto de Salud Publica de Chile                                                                                                | Andrés E Castillo, Bárbara Parra, Paz Tapia, Jaime Lagos, Loredana Arata, Alejandra Acevedo, Winston Andrade, Gabriel Leal, Carolina Tambley, Patricia Bustos, Rodrigo Fasce, Jorge Fernandez                                                                                                                                                                                                                                                                                                                                                                                                                                                                             |
| EPI_ISL_445373                                                                                                                 | HOSPITAL SAN JUAN DE DIOS                                                             | Instituto de Salud Publica de Chile                                                                                                | Andrés E Castillo, Bárbara Parra, Paz Tapia, Jaime Lagos, Loredana Arata, Alejandra Acevedo, Winston Andrade, Gabriel Leal, Carolina Tambley, Patricia Bustos, Rodrigo Fasce, Jorge Fernandez                                                                                                                                                                                                                                                                                                                                                                                                                                                                             |
| EPI_ISL_450873                                                                                                                 | Evandro Chagas Institute                                                              | Evandro Chagas Institute                                                                                                           | Santos, M.C.; Silva, A.M.; Junior, W.D.C.; Barbagelata, L.S.; Ferreira, J.A.; Sousa, E.M.A.; da Silva, P.S.; Martins, L.C.; Sousa Junior, E.C.; Viana, G.M.R                                                                                                                                                                                                                                                                                                                                                                                                                                                                                                              |
| EPI_ISL_450874                                                                                                                 | Evandro Chagas Institute                                                              | Evandro Chagas Institute                                                                                                           | Santos, M.C.; Silva, A.M.; Junior, W.D.C.; Barbagelata, L.S.; Ferreira, J.A.; Sousa, E.M.A.; da Silva, P.S.; Martins, L.C.; Sousa Junior, E.C.; Viana, G.M.R                                                                                                                                                                                                                                                                                                                                                                                                                                                                                                              |
| EPI_ISL_451558                                                                                                                 | Medlab Pathology                                                                      | NSW Health Pathology - Institute of Clinical Pathology and Medical Research; Westmead Hospital; University of Sydney               | CIDM-PH et al.                                                                                                                                                                                                                                                                                                                                                                                                                                                                                                                                                                                                                                                            |
| EPI_ISL_451594                                                                                                                 | Childrens Hospital Westmead                                                           | NSW Health Pathology - Institute of Clinical Pathology and Medical Research; Westmead Hospital; University of Sydney               | CIDM-PH et al.                                                                                                                                                                                                                                                                                                                                                                                                                                                                                                                                                                                                                                                            |
| EPI_ISL_452318                                                                                                                 | Michigan Department of Health and Human Services, Bureau of Laboratories              | Michigan Department of Health and Human Services, Bureau of Laboratories                                                           | Blankenship HM, Riner D, Soehnlén MK                                                                                                                                                                                                                                                                                                                                                                                                                                                                                                                                                                                                                                      |
| EPI_ISL_454057, EPI_ISL_454172, EPI_ISL_454311                                                                                 | unknown                                                                               | Instituto Nacional de Saude (INSA)                                                                                                 | Borges et al                                                                                                                                                                                                                                                                                                                                                                                                                                                                                                                                                                                                                                                              |
| EPI_ISL_454376                                                                                                                 | UPMC Clinical Microbiology Laboratory                                                 | Microbial Genome Sequencing Center, Microbial Genomic Epidemiological Laboratory                                                   | Mustapha M. Mustapha, Jane W. Marsh, Dan Snyder, Marissa P. Griffith, Stephanie L. Mitchell, Vatsala R. Srinivasa, Kady D. Waggle, Chineló Ezeonwuku, Vaughn S. Cooper, Lee H. Harrison                                                                                                                                                                                                                                                                                                                                                                                                                                                                                   |
| EPI_ISL_456071, EPI_ISL_456072, EPI_ISL_456073, EPI_ISL_456074, EPI_ISL_456075                                                 | Laboratory of Respiratory Viruses and Measles, Oswaldo Cruz Institute, FIOCRUZ        | Laboratory of Respiratory Viruses and Measles, Oswaldo Cruz Institute, FIOCRUZ                                                     | Paola Resende, Luciana Appolinario, Fernando Motta, Aline Mattos, Milene Miranda, Cristiana Garcia, Braulia Caetano, Maria Ogrzewalska, Jonathan Lopes, Marilda Siqueira                                                                                                                                                                                                                                                                                                                                                                                                                                                                                                  |
| EPI_ISL_456076, EPI_ISL_456077                                                                                                 | LACEN RJ - Laboratório Central de Saúde Pública Noel Nutels                           | Laboratory of Respiratory Viruses and Measles, Oswaldo Cruz Institute, FIOCRUZ                                                     | Paola Resende, Luciana Appolinario, Fernando Motta, Aline Mattos, Milene Miranda, Cristiana Garcia, Braulia Caetano, Maria Ogrzewalska, Jonathan Lopes, Marilda Siqueira                                                                                                                                                                                                                                                                                                                                                                                                                                                                                                  |
| EPI_ISL_456079, EPI_ISL_456080, EPI_ISL_456081                                                                                 | Laboratory of Respiratory Viruses and Measles,                                        | Laboratory of Respiratory Viruses and Measles,                                                                                     | Paola Resende, Luciana Appolinario, Fernando Motta, Aline Mattos, Milene Miranda, Cristiana Garcia, Braulia Caetano, Maria Ogrzewalska, Jonathan                                                                                                                                                                                                                                                                                                                                                                                                                                                                                                                          |

|                                                                                                                                                                                                                                                                                                                                                                                                                                                                                                                                |                                                                                                                                                                                                 |                                                                                    |                                                                                                                                                                                                                                                                                                                                                                                                                                                                    |
|--------------------------------------------------------------------------------------------------------------------------------------------------------------------------------------------------------------------------------------------------------------------------------------------------------------------------------------------------------------------------------------------------------------------------------------------------------------------------------------------------------------------------------|-------------------------------------------------------------------------------------------------------------------------------------------------------------------------------------------------|------------------------------------------------------------------------------------|--------------------------------------------------------------------------------------------------------------------------------------------------------------------------------------------------------------------------------------------------------------------------------------------------------------------------------------------------------------------------------------------------------------------------------------------------------------------|
|                                                                                                                                                                                                                                                                                                                                                                                                                                                                                                                                | Oswaldo Cruz Institute, FIOCRUZ                                                                                                                                                                 | Oswaldo Cruz Institute, FIOCRUZ                                                    | Lopes, Marilda Siqueira                                                                                                                                                                                                                                                                                                                                                                                                                                            |
| EPI_ISL_456082                                                                                                                                                                                                                                                                                                                                                                                                                                                                                                                 | LACEN RJ - Laboratório Central de Saúde Pública Noel Nutels                                                                                                                                     | Laboratory of Respiratory Viruses and Measles, Oswaldo Cruz Institute, FIOCRUZ     | Paola Resende, Luciana Apolinario, Fernando Motta, Aline Mattos, Milene Miranda, Cristiana Garcia, Braulia Caetano, Maria Ogrzewalska, Jonathan Lopes, Marilda Siqueira                                                                                                                                                                                                                                                                                            |
| EPI_ISL_456084, EPI_ISL_456085, EPI_ISL_456086, EPI_ISL_456087, EPI_ISL_456089, EPI_ISL_456090, EPI_ISL_456091, EPI_ISL_456092, EPI_ISL_456093, EPI_ISL_456094, EPI_ISL_456095, EPI_ISL_456096, EPI_ISL_456097, EPI_ISL_456098, EPI_ISL_456099, EPI_ISL_456100, EPI_ISL_456101, EPI_ISL_456102, EPI_ISL_456103, EPI_ISL_456104, EPI_ISL_456105, EPI_ISL_456106                                                                                                                                                                 |                                                                                                                                                                                                 |                                                                                    |                                                                                                                                                                                                                                                                                                                                                                                                                                                                    |
| see above                                                                                                                                                                                                                                                                                                                                                                                                                                                                                                                      | Laboratory of Respiratory Viruses and Measles, Oswaldo Cruz Institute, FIOCRUZ                                                                                                                  | Laboratory of Respiratory Viruses and Measles, Oswaldo Cruz Institute, FIOCRUZ     | Paola Resende, Luciana Apolinario, Fernando Motta, Aline Mattos, Milene Miranda, Cristiana Garcia, Braulia Caetano, Maria Ogrzewalska, Jonathan Lopes, Marilda Siqueira                                                                                                                                                                                                                                                                                            |
| EPI_ISL_457796                                                                                                                                                                                                                                                                                                                                                                                                                                                                                                                 | Johns Hopkins Hospital Department of Pathology                                                                                                                                                  | Johns Hopkins Hospital Department of Pathology                                     | Peter M. Thielen, Thomas Mehoke, Shirlee Wohl, Srividya Ramakrishnan, Melanie Kirsche, Amanda Erlund, Craig Howser, Kristina Zudock, Oluwaseun Falade-Nwulia, Norah Sadowski, Paul Morris, Mark Hopkins, Yunfan Fan, Nidia Trovao, Victoria Gniazdowski, Michael C. Schatz, Stuart C. Ray, Winston Timp, Heba H. Mostafa                                                                                                                                           |
| EPI_ISL_457953                                                                                                                                                                                                                                                                                                                                                                                                                                                                                                                 | Laboratorio de Biología Molecular Asociación Española Primera en Salud                                                                                                                          | Departments of Pathology and Medicine, New York University School of Medicine      | Maria Victoria Elizondo, Maria Noel Zubillaga, Gonzalo Manrique, Paul Zappile, Gael Westby, Matthew T Maurano, Christian Marier, Adriana Heguy                                                                                                                                                                                                                                                                                                                     |
| EPI_ISL_458138, EPI_ISL_458139, EPI_ISL_458143, EPI_ISL_458144, EPI_ISL_458145, EPI_ISL_458148, EPI_ISL_458149                                                                                                                                                                                                                                                                                                                                                                                                                 | Evandro Chagas Institute                                                                                                                                                                        | Evandro Chagas Institute                                                           | Santos, M.C.; Silva, A.M.; Junior, W.D.C.; Barbagelata, L.S.; Ferreira, J.A.; Sousa, E.M.A.; da Silva, P.S.; Resque, H.R; Martins, L.C.; Sousa Junior, E.C.;Viana, G.M.R                                                                                                                                                                                                                                                                                           |
| EPI_ISL_465088                                                                                                                                                                                                                                                                                                                                                                                                                                                                                                                 | Respiratory Virus Unit, Microbiology Services Colindale, Public Health England                                                                                                                  | Respiratory Virus Unit, Microbiology Services Colindale, Public Health England     | PHE Covid Sequencing Team                                                                                                                                                                                                                                                                                                                                                                                                                                          |
| EPI_ISL_467345, EPI_ISL_467347, EPI_ISL_467348, EPI_ISL_467349, EPI_ISL_467350, EPI_ISL_467351, EPI_ISL_467352, EPI_ISL_467353, EPI_ISL_467355, EPI_ISL_467357, EPI_ISL_467358, EPI_ISL_467360, EPI_ISL_467361, EPI_ISL_467362, EPI_ISL_467363, EPI_ISL_467364, EPI_ISL_467365, EPI_ISL_467367, EPI_ISL_467368, EPI_ISL_467369, EPI_ISL_467370, EPI_ISL_467371                                                                                                                                                                 |                                                                                                                                                                                                 |                                                                                    |                                                                                                                                                                                                                                                                                                                                                                                                                                                                    |
| see above                                                                                                                                                                                                                                                                                                                                                                                                                                                                                                                      | Laboratory of Respiratory Viruses and Measles, Oswaldo Cruz Institute, FIOCRUZ                                                                                                                  | Laboratory of Respiratory Viruses and Measles, Oswaldo Cruz Institute, FIOCRUZ     | Paola Resende, Luciana Apolinario, Fernando Motta, Anna Carolina Paixão, Ana Carolina Mendonça, Aline Mattos, Milene Miranda, Cristiana Garcia, Braulia Caetano, Maria Ogrzewalska, Jonathan Lopes, Marilda Siqueira                                                                                                                                                                                                                                               |
| EPI_ISL_468310                                                                                                                                                                                                                                                                                                                                                                                                                                                                                                                 | Hospital Sao Paulo de Ensino da UNIFESP                                                                                                                                                         | Instituto Adolfo Lutz, Interdisciplinary Procedures Center, Strategic Laboratory   | Claudio Tavares Sacchi, Claudia Regina Gonçalves, Erica Valessa Ramos Gomes                                                                                                                                                                                                                                                                                                                                                                                        |
| EPI_ISL_468752                                                                                                                                                                                                                                                                                                                                                                                                                                                                                                                 | Center for Genome Regulation (CRG)                                                                                                                                                              | Center for Mathematical Modeling and Center for Genome Regulation. Santiago, Chile | Gaete A, Travisany D, Palma R, Urta C, Varas M, Allende ML, Maass A, González M.                                                                                                                                                                                                                                                                                                                                                                                   |
| EPI_ISL_470570, EPI_ISL_470572, EPI_ISL_470577, EPI_ISL_470580, EPI_ISL_470582, EPI_ISL_470583, EPI_ISL_470584, EPI_ISL_470585, EPI_ISL_470586, EPI_ISL_470587, EPI_ISL_470588                                                                                                                                                                                                                                                                                                                                                 |                                                                                                                                                                                                 |                                                                                    |                                                                                                                                                                                                                                                                                                                                                                                                                                                                    |
| see above                                                                                                                                                                                                                                                                                                                                                                                                                                                                                                                      | Hermes Pardini                                                                                                                                                                                  | Bioinformatics Laboratory / LNCC                                                   | Alexandra Gerber, Ana Paula Guimarães, Luiz Gonzaga Paula de Almeida, Ronaldo da Silva Francisco Junior, Mariane Talon, Filipe Romero, Átila Duque Rossi, Terezinha Marta Pereira, working group UFRJ, Jaqueline Goes de Jesus, Ingra Morales Claro, Ester Cerdeira Sabino, Nuno Rodrigues Faria, CADDE-group, Laboratorio Hermes Pardini, Laboratorio Simile, working group UFMG, Amilcar Tanuri, Carolina Voloch, Renato Santana Aguiar e Ana Tereza Vasconcelos |
| EPI_ISL_470589, EPI_ISL_470591, EPI_ISL_470592, EPI_ISL_470594, EPI_ISL_470595, EPI_ISL_470596, EPI_ISL_470597                                                                                                                                                                                                                                                                                                                                                                                                                 | Simile                                                                                                                                                                                          | Bioinformatics Laboratory / LNCC                                                   | Alexandra Gerber, Ana Paula Guimarães, Luiz Gonzaga Paula de Almeida, Ronaldo da Silva Francisco Junior, Mariane Talon, Filipe Romero, Átila Duque Rossi, Terezinha Marta Pereira, working group UFRJ, Jaqueline Goes de Jesus, Ingra Morales Claro, Ester Cerdeira Sabino, Nuno Rodrigues Faria, CADDE-group, Laboratorio Hermes Pardini, Laboratorio Simile, working group UFMG, Amilcar Tanuri, Carolina Voloch, Renato Santana Aguiar e Ana Tereza Vasconcelos |
| EPI_ISL_470601, EPI_ISL_470606, EPI_ISL_470609, EPI_ISL_470611, EPI_ISL_470613, EPI_ISL_470614                                                                                                                                                                                                                                                                                                                                                                                                                                 | Hermes Pardini                                                                                                                                                                                  | Bioinformatics Laboratory / LNCC                                                   | Alexandra Gerber, Ana Paula Guimarães, Luiz Gonzaga Paula de Almeida, Ronaldo da Silva Francisco Junior, Mariane Talon, Filipe Romero, Átila Duque Rossi, Terezinha Marta Pereira, working group UFRJ, Jaqueline Goes de Jesus, Ingra Morales Claro, Ester Cerdeira Sabino, Nuno Rodrigues Faria, CADDE-group, Laboratorio Hermes Pardini, Laboratorio Simile, working group UFMG, Amilcar Tanuri, Carolina Voloch, Renato Santana Aguiar e Ana Tereza Vasconcelos |
| EPI_ISL_470615, EPI_ISL_470617, EPI_ISL_470618, EPI_ISL_470620, EPI_ISL_470621, EPI_ISL_470623, EPI_ISL_470624, EPI_ISL_470625, EPI_ISL_470626, EPI_ISL_470627, EPI_ISL_470628, EPI_ISL_470629, EPI_ISL_470630, EPI_ISL_470631, EPI_ISL_470632, EPI_ISL_470633, EPI_ISL_470634, EPI_ISL_470635, EPI_ISL_470636, EPI_ISL_470637, EPI_ISL_470639, EPI_ISL_470640, EPI_ISL_470641, EPI_ISL_470642, EPI_ISL_470643, EPI_ISL_470644, EPI_ISL_470645, EPI_ISL_470646, EPI_ISL_470647, EPI_ISL_470648, EPI_ISL_470649, EPI_ISL_470650 |                                                                                                                                                                                                 |                                                                                    |                                                                                                                                                                                                                                                                                                                                                                                                                                                                    |
| see above                                                                                                                                                                                                                                                                                                                                                                                                                                                                                                                      | Laboratório de Virologia Molecular / UFRJ                                                                                                                                                       | Bioinformatics Laboratory / LNCC                                                   | Alexandra Gerber, Ana Paula Guimarães, Luiz Gonzaga Paula de Almeida, Ronaldo da Silva Francisco Junior, Mariane Talon, Filipe Romero, Átila Duque Rossi, Terezinha Marta Pereira, working group UFRJ, Jaqueline Goes de Jesus, Ingra Morales Claro, Ester Cerdeira Sabino, Nuno Rodrigues Faria, CADDE-group, Laboratorio Hermes Pardini, Laboratorio Simile, working group UFMG, Amilcar Tanuri, Carolina Voloch, Renato Santana Aguiar e Ana Tereza Vasconcelos |
| EPI_ISL_470655                                                                                                                                                                                                                                                                                                                                                                                                                                                                                                                 | Hermes Pardini                                                                                                                                                                                  | Bioinformatics Laboratory / LNCC                                                   | Alexandra Gerber, Ana Paula Guimarães, Luiz Gonzaga Paula de Almeida, Ronaldo da Silva Francisco Junior, Mariane Talon, Filipe Romero, Átila Duque Rossi, Terezinha Marta Pereira, working group UFRJ, Jaqueline Goes de Jesus, Ingra Morales Claro, Ester Cerdeira Sabino, Nuno Rodrigues Faria, CADDE-group, Laboratorio Hermes Pardini, Laboratorio Simile, working group UFMG, Amilcar Tanuri, Carolina Voloch, Renato Santana Aguiar e Ana Tereza Vasconcelos |
| EPI_ISL_471248                                                                                                                                                                                                                                                                                                                                                                                                                                                                                                                 | Wisconsin State Laboratory of Hygiene Communicable Disease Division                                                                                                                             | Wisconsin State Laboratory of Hygiene Communicable Disease Division                | Kelsey R. Florek, Abigail C. Shockey                                                                                                                                                                                                                                                                                                                                                                                                                               |
| EPI_ISL_471551                                                                                                                                                                                                                                                                                                                                                                                                                                                                                                                 | Hospital Sao Paulo de Ensino da Unifesp                                                                                                                                                         | Instituto Adolfo Lutz, Interdisciplinary Procedures Center, Strategic Laboratory   | Claudio Tavares Sacchi, Claudia Regina Gonçalves, Erica Valessa Ramos Gomes                                                                                                                                                                                                                                                                                                                                                                                        |
| EPI_ISL_471554                                                                                                                                                                                                                                                                                                                                                                                                                                                                                                                 | Hospital Bosque da Saúde                                                                                                                                                                        | Instituto Adolfo Lutz, Interdisciplinary Procedures Center, Strategic Laboratory   | Claudio Tavares Sacchi, Claudia Regina Gonçalves, Erica Valessa Ramos Gomes                                                                                                                                                                                                                                                                                                                                                                                        |
| EPI_ISL_473841                                                                                                                                                                                                                                                                                                                                                                                                                                                                                                                 | Virology Department, Royal Infirmary of Edinburgh, NHS Lothian / School of Biological Sciences, University of Edinburgh / Institute of Genetics and Molecular Medicine, University of Edinburgh | COVID-19 Genomics UK (COG-UK) Consortium                                           | McHugh M, Dewar R, Rooke S, Gallagher M, Balcaza C, O'Toole Á, Scher E, Hill V, McCrone JT, Colquhoun R, Yu X, Jackson B, Rambaut A, Williams TC, Templeton K                                                                                                                                                                                                                                                                                                      |
| EPI_ISL_476155, EPI_ISL_476158, EPI_ISL_476160, EPI_ISL_476168, EPI_ISL_476170                                                                                                                                                                                                                                                                                                                                                                                                                                                 | Laboratório de Patologia Clínica - UNICAMP                                                                                                                                                      | Laboratório de Estudos de Vírus Emergentes - UNICAMP                               | José Luiz Proença-Modena, Magnun Nueldo Nunes dos Santos, Angelica Schreiber, Julia Forato,Camila Simeoni, Marcilio Jorge Fumagalli, Mariene Ribeiro Amorim, Darlan da Silva Candido, Nuno Rodrigues Faria, Julien Theze, Luiz Gonzaga,Jaqueline Goes Jesus e William Marciel de Souza                                                                                                                                                                             |
| EPI_ISL_476171, EPI_ISL_476172, EPI_ISL_476173, EPI_ISL_476174, EPI_ISL_476178, EPI_ISL_476180, EPI_ISL_476188, EPI_ISL_476189, EPI_ISL_476190, EPI_ISL_476191, EPI_ISL_476192, EPI_ISL_476194, EPI_ISL_476195, EPI_ISL_476201, EPI_ISL_476202                                                                                                                                                                                                                                                                                 |                                                                                                                                                                                                 |                                                                                    |                                                                                                                                                                                                                                                                                                                                                                                                                                                                    |
| see above                                                                                                                                                                                                                                                                                                                                                                                                                                                                                                                      | DB Diagnósticos do Brasil                                                                                                                                                                       | Instituto de Medicina Tropical da Universidade de São Paulo                        | Samples: Nelson Gaburo Jr; Sequencing: Ingra Morales Claro, Jaqueline Goes de Jesus, Erika Regina Manuli, Flavia Cristina da Silva Sales, Thais de Moura Coletti, Camila Alves Maia da Silva, Mariana Severo Ramundo, Giulia Magalhaes Ferreira, Darlan da Silva Candido, Julien Theze, Nuno Faria, Ester Sabino                                                                                                                                                   |
| EPI_ISL_476204                                                                                                                                                                                                                                                                                                                                                                                                                                                                                                                 | Hospital da Clínicas da Faculdade de Medicina da Universidade de São Paulo                                                                                                                      | Instituto de Medicina Tropical da Universidade de São Paulo                        | Samples: Ingra Morales Claro, Erika Regina Manuli, Cecilia Salette Alencar, Carolina S. Lazar, Silvia F. Costa; Sequencing: Ingra Morales Claro, Jaqueline Goes de Jesus, Erika Regina Manuli, Flavia Cristina da Silva Sales, Thais de Moura Coletti, Camila Alves Maia da Silva, Mariana Severo Ramundo, Giulia Magalhaes Ferreira, Darlan da Silva Candido, Julien Theze, Nuno Faria, Ester Sabino                                                              |
| EPI_ISL_476210, EPI_ISL_476211, EPI_ISL_476215, EPI_ISL_476216                                                                                                                                                                                                                                                                                                                                                                                                                                                                 | DB Diagnósticos do Brasil                                                                                                                                                                       | Instituto de Medicina Tropical da Universidade de São Paulo                        | Samples: Nelson Gaburo Jr; Sequencing: Ingra Morales Claro, Jaqueline Goes de Jesus, Erika Regina Manuli, Flavia Cristina da Silva Sales, Thais de Moura Coletti, Camila Alves Maia da Silva, Mariana Severo Ramundo, Giulia Magalhaes Ferreira, Darlan da Silva Candido, Julien Theze, Nuno Faria, Ester Sabino                                                                                                                                                   |
| EPI_ISL_476221                                                                                                                                                                                                                                                                                                                                                                                                                                                                                                                 | Laboratory Fleury                                                                                                                                                                               | Instituto de Medicina Tropical da Universidade de São Paulo                        | Samples: Celso Granato; Sequencing: Ingra Morales Claro, Jaqueline Goes de Jesus, Erika Regina Manuli, Flavia Cristina da Silva Sales, Thais de Moura Coletti, Camila Alves Maia da Silva, Mariana Severo Ramundo, Giulia Magalhaes Ferreira, Darlan da Silva Candido, Julien Theze, Nuno Faria, Ester Sabino                                                                                                                                                      |

|                                                                                                                                                                                                                                                                                                                                                                                                                                                                                                                                                                                                |                                                                                                            |                                                                                                                                                    |                                                                                                                                                                                                                                                                                                                                                                                                       |                                                                                                                                                                                                                                                                                                                                                                                                       |
|------------------------------------------------------------------------------------------------------------------------------------------------------------------------------------------------------------------------------------------------------------------------------------------------------------------------------------------------------------------------------------------------------------------------------------------------------------------------------------------------------------------------------------------------------------------------------------------------|------------------------------------------------------------------------------------------------------------|----------------------------------------------------------------------------------------------------------------------------------------------------|-------------------------------------------------------------------------------------------------------------------------------------------------------------------------------------------------------------------------------------------------------------------------------------------------------------------------------------------------------------------------------------------------------|-------------------------------------------------------------------------------------------------------------------------------------------------------------------------------------------------------------------------------------------------------------------------------------------------------------------------------------------------------------------------------------------------------|
| EPI_ISL_476245, EPI_ISL_476246, EPI_ISL_476247, EPI_ISL_476248, EPI_ISL_476263, EPI_ISL_476273, EPI_ISL_476274, EPI_ISL_476276                                                                                                                                                                                                                                                                                                                                                                                                                                                                 | Hospital da Clínicas da Faculdade de Medicina da Universidade de São Paulo                                 | Instituto de Medicina Tropical da Universidade de São Paulo                                                                                        | Samples: Ingra Morales Claro, Erika Regina Manuli, Cecília Salette Alencar, Carolina S. Lazar, Silvia F. Costa; Sequencing: Ingra Morales Claro, Jaqueline Goes de Jesus, Erika Regina Manuli, Flávia Cristina da Silva Sales, Thais de Moura Coletti, Camila Alves Maia da Silva, Mariana Severo Ramundo, Giulia Magalhaes Ferreira, Darlan da Silva Candido, Julien Theze, Nuno Faria, Ester Sabino |                                                                                                                                                                                                                                                                                                                                                                                                       |
| EPI_ISL_476278, EPI_ISL_476281, EPI_ISL_476286, EPI_ISL_476290, EPI_ISL_476292, EPI_ISL_476295, EPI_ISL_476297, EPI_ISL_476300, EPI_ISL_476301, EPI_ISL_476302, EPI_ISL_476303, EPI_ISL_476305, EPI_ISL_476305, EPI_ISL_476309, EPI_ISL_476310, EPI_ISL_476315, EPI_ISL_476316, EPI_ISL_476317, EPI_ISL_476319, EPI_ISL_476324, EPI_ISL_476327, EPI_ISL_476328, EPI_ISL_476329, EPI_ISL_476330, EPI_ISL_476332, EPI_ISL_476334, EPI_ISL_476335, EPI_ISL_476350, EPI_ISL_476351, EPI_ISL_476352, EPI_ISL_476355, EPI_ISL_476356, EPI_ISL_476358, EPI_ISL_476360, EPI_ISL_476362, EPI_ISL_476365 | see above                                                                                                  | DB Diagnósticos do Brasil                                                                                                                          | Instituto de Medicina Tropical da Universidade de São Paulo                                                                                                                                                                                                                                                                                                                                           | Samples: Nelson Gaburo Jr; Sequencing: Ingra Morales Claro, Jaqueline Goes de Jesus, Erika Regina Manuli, Flávia Cristina da Silva Sales, Thais de Moura Coletti, Camila Alves Maia da Silva, Mariana Severo Ramundo, Giulia Magalhaes Ferreira, Darlan da Silva Candido, Julien Theze, Nuno Faria, Ester Sabino                                                                                      |
| EPI_ISL_476374, EPI_ISL_476377, EPI_ISL_476383                                                                                                                                                                                                                                                                                                                                                                                                                                                                                                                                                 | Hospital da Clínicas da Faculdade de Medicina da Universidade de São Paulo                                 | Instituto de Medicina Tropical da Universidade de São Paulo                                                                                        | Samples: Ingra Morales Claro, Erika Regina Manuli, Cecília Salette Alencar, Carolina S. Lazar, Silvia F. Costa; Sequencing: Ingra Morales Claro, Jaqueline Goes de Jesus, Erika Regina Manuli, Flávia Cristina da Silva Sales, Thais de Moura Coletti, Camila Alves Maia da Silva, Mariana Severo Ramundo, Giulia Magalhaes Ferreira, Darlan da Silva Candido, Julien Theze, Nuno Faria, Ester Sabino |                                                                                                                                                                                                                                                                                                                                                                                                       |
| EPI_ISL_476392, EPI_ISL_476422, EPI_ISL_476425                                                                                                                                                                                                                                                                                                                                                                                                                                                                                                                                                 | Laboratório de Patologia Clínica - UNICAMP                                                                 | Laboratório de Estudos de Vírus Emergentes - UNICAMP                                                                                               | José Luiz Prouença-Modena, Magnus Nueldo Nunes dos Santos, Angelica Schreiber, Julia Forato, Camila Simeoni, Marcilio Jorge Fumagalli, Mariene Ribeiro Amorim, Darlan da Silva Candido, Nuno Rodrigues Faria, Julien Theze, Luiz Gonzaga, Jaqueline Goes Jesus e William Marciel de Souza                                                                                                             |                                                                                                                                                                                                                                                                                                                                                                                                       |
| EPI_ISL_476429, EPI_ISL_476435, EPI_ISL_476439, EPI_ISL_476444, EPI_ISL_476449, EPI_ISL_476450, EPI_ISL_476459, EPI_ISL_476483, EPI_ISL_476484, EPI_ISL_476486, EPI_ISL_476487                                                                                                                                                                                                                                                                                                                                                                                                                 | see above                                                                                                  | Hospital da Clínicas da Faculdade de Medicina da Universidade de São Paulo                                                                         | Instituto de Medicina Tropical da Universidade de São Paulo                                                                                                                                                                                                                                                                                                                                           | Samples: Ingra Morales Claro, Erika Regina Manuli, Cecília Salette Alencar, Carolina S. Lazar, Silvia F. Costa; Sequencing: Ingra Morales Claro, Jaqueline Goes de Jesus, Erika Regina Manuli, Flávia Cristina da Silva Sales, Thais de Moura Coletti, Camila Alves Maia da Silva, Mariana Severo Ramundo, Giulia Magalhaes Ferreira, Darlan da Silva Candido, Julien Theze, Nuno Faria, Ester Sabino |
| EPI_ISL_478718                                                                                                                                                                                                                                                                                                                                                                                                                                                                                                                                                                                 | Sydney South West Pathology Service (SSWPS) - Concord Repatriation General Hospital - NSW Health Pathology | NSW Health Pathology - Institute of Clinical Pathology and Medical Research; Westmead Hospital; University of Sydney                               | CIDM-PH et al.                                                                                                                                                                                                                                                                                                                                                                                        |                                                                                                                                                                                                                                                                                                                                                                                                       |
| EPI_ISL_480338, EPI_ISL_480339, EPI_ISL_480340, EPI_ISL_480341, EPI_ISL_480346                                                                                                                                                                                                                                                                                                                                                                                                                                                                                                                 | Microbial Genomics Laboratory, Institut Pasteur de Montevideo                                              | Microbial Genomics Laboratory, Institut Pasteur de Montevideo                                                                                      | Cecilia Salazar, Marianoel Pereira, Ignacio Ferrés, Gonzalo Moratorio, Pilar Moreno, Gregorio Iraola                                                                                                                                                                                                                                                                                                  |                                                                                                                                                                                                                                                                                                                                                                                                       |
| EPI_ISL_480356, EPI_ISL_480357                                                                                                                                                                                                                                                                                                                                                                                                                                                                                                                                                                 | University of Wisconsin-Madison AIDS Vaccine Research Laboratories                                         | University of Wisconsin-Madison AIDS Vaccine Research Laboratories                                                                                 | Gage Moreno, Katarina Braun, et al. AIDS Vaccine Research Laboratories                                                                                                                                                                                                                                                                                                                                |                                                                                                                                                                                                                                                                                                                                                                                                       |
| EPI_ISL_483102                                                                                                                                                                                                                                                                                                                                                                                                                                                                                                                                                                                 | SA Pathology                                                                                               | SA Pathology                                                                                                                                       | Lex Leong, Chuan Kok Lim, Mark Turra, Ivan Bastian, Geoff Higgins                                                                                                                                                                                                                                                                                                                                     |                                                                                                                                                                                                                                                                                                                                                                                                       |
| EPI_ISL_486427                                                                                                                                                                                                                                                                                                                                                                                                                                                                                                                                                                                 | unknown                                                                                                    | Clinical Laboratory, Hospital Israelita Albert Einstein                                                                                            | Amgarte D., Malta, F., Guedes, R.L., Santana, R.A., de Menezes, F.G., Mangueira, C.L. and Pinho, J.R.                                                                                                                                                                                                                                                                                                 |                                                                                                                                                                                                                                                                                                                                                                                                       |
| EPI_ISL_491917                                                                                                                                                                                                                                                                                                                                                                                                                                                                                                                                                                                 | Naval Infectious Diseases Diagnostic Laboratory                                                            | Naval Medical Research Center Biological Defense Research Directorate                                                                              | Logan Voegtly, Regina Cer, Lindsay Glang, Victor Sugiharto, Francisco Malgon Bautista, Hua Wei Chen, Dessiree Pena-Gomez, Megan Schilling, Adrian Paskey, Kyle Long, Mark Simons, Kimberly Bishop-Lilly                                                                                                                                                                                               |                                                                                                                                                                                                                                                                                                                                                                                                       |
| EPI_ISL_492032                                                                                                                                                                                                                                                                                                                                                                                                                                                                                                                                                                                 | Instituto de Biologia do Exército                                                                          | Laboratório Metabolismo Macromolecular FirminoTorres de Castro, Instituto de Biofísica Carlos Chagas Filho, Universidade Federal do Rio de Janeiro | Bianca Catarina Azevedo Cabral, Aline Rosa Vianna de Souza, Marcos Dornelas-Ribeiro, Tatiana LS Nogueira, Nádia Vaez Gonçalves da Cruz, Caleb GM Santos, Elizabeth Valentin, Marcio da Costa Cipitelli, Virginia Sara Grancieri do Amaral, Rodrigo Soares de Moura Neto, Clarissa Damaso, Rosane Silva                                                                                                |                                                                                                                                                                                                                                                                                                                                                                                                       |
| EPI_ISL_492033                                                                                                                                                                                                                                                                                                                                                                                                                                                                                                                                                                                 | Instituto de Biologia do Exército                                                                          | Laboratório Metabolismo Macromolecular FirminoTorres de Castro, Instituto de Biofísica Carlos Chagas Filho, Universidade Federal do Rio de Janeiro | Bianca Catarina Azevedo Cabral, Aline Rosa Vianna de Souza, Caleb GM Santos, Marcos Dornelas-Ribeiro, Tatiana LS Nogueira, Nádia Vaez Gonçalves da Cruz, Elizabeth Valentin, Marcio da Costa Cipitelli, Virginia Sara Grancieri do Amaral, Rodrigo Soares de Moura Neto, Clarissa Damaso, Rosane Silva                                                                                                |                                                                                                                                                                                                                                                                                                                                                                                                       |
| EPI_ISL_492034                                                                                                                                                                                                                                                                                                                                                                                                                                                                                                                                                                                 | Instituto de Biologia do Exército                                                                          | Laboratório Metabolismo Macromolecular FirminoTorres de Castro, Instituto de Biofísica Carlos Chagas Filho, Universidade Federal do Rio de Janeiro | Bianca Catarina Azevedo Cabral, Aline Rosa Vianna de Souza, Nádia Vaez Gonçalves da Cruz, Caleb GM Santos, Marcos Dornelas-Ribeiro, Tatiana LS Nogueira, Elizabeth Valentin, Marcio da Costa Cipitelli, Virginia Sara Grancieri do Amaral, Rodrigo Soares de Moura Neto, Clarissa Damaso, Rosane Silva                                                                                                |                                                                                                                                                                                                                                                                                                                                                                                                       |
| EPI_ISL_492035                                                                                                                                                                                                                                                                                                                                                                                                                                                                                                                                                                                 | Instituto de Biologia do Exército                                                                          | Laboratório Metabolismo Macromolecular FirminoTorres de Castro, Instituto de Biofísica Carlos Chagas Filho, Universidade Federal do Rio de Janeiro | Bianca Catarina Azevedo Cabral, Aline Rosa Vianna de Souza, Tatiana LS Nogueira, Nádia Vaez Gonçalves da Cruz, Caleb GM Santos, Marcos Dornelas-Ribeiro, Elizabeth Valentin, Marcio da Costa Cipitelli, Virginia Sara Grancieri do Amaral, Rodrigo Soares de Moura Neto, Clarissa Damaso, Rosane Silva                                                                                                |                                                                                                                                                                                                                                                                                                                                                                                                       |
| EPI_ISL_492037                                                                                                                                                                                                                                                                                                                                                                                                                                                                                                                                                                                 | Instituto de Biologia do Exército                                                                          | Laboratório Metabolismo Macromolecular FirminoTorres de Castro, Instituto de Biofísica Carlos Chagas Filho, Universidade Federal do Rio de Janeiro | Bianca Catarina Azevedo Cabral, Aline Rosa Vianna de Souza, Caleb GM Santos, Marcos Dornelas-Ribeiro, Tatiana LS Nogueira, Nádia Vaez Gonçalves da Cruz, Elizabeth Valentin, Marcio da Costa Cipitelli, Virginia Sara Grancieri do Amaral, Rodrigo Soares de Moura Neto, Clarissa Damaso, Rosane Silva                                                                                                |                                                                                                                                                                                                                                                                                                                                                                                                       |
| EPI_ISL_492038                                                                                                                                                                                                                                                                                                                                                                                                                                                                                                                                                                                 | Instituto de Biologia do Exército                                                                          | Laboratório Metabolismo Macromolecular FirminoTorres de Castro, Instituto de Biofísica Carlos Chagas Filho, Universidade Federal do Rio de Janeiro | Bianca Catarina Azevedo Cabral, Aline Rosa Vianna de Souza, Nádia Vaez Gonçalves da Cruz, Caleb GM Santos, Marcos Dornelas-Ribeiro, Tatiana LS Nogueira, Elizabeth Valentin, Marcio da Costa Cipitelli, Virginia Sara Grancieri do Amaral, Rodrigo Soares de Moura Neto, Clarissa Damaso, Rosane Silva                                                                                                |                                                                                                                                                                                                                                                                                                                                                                                                       |
| EPI_ISL_492039                                                                                                                                                                                                                                                                                                                                                                                                                                                                                                                                                                                 | Instituto de Biologia do Exército                                                                          | Laboratório Metabolismo Macromolecular FirminoTorres de Castro, Instituto de Biofísica Carlos Chagas Filho, Universidade Federal do Rio de Janeiro | Bianca Catarina Azevedo Cabral, Aline Rosa Vianna de Souza, Tatiana LS Nogueira, Nádia Vaez Gonçalves da Cruz, Caleb GM Santos, Marcos Dornelas-Ribeiro, Elizabeth Valentin, Marcio da Costa Cipitelli, Virginia Sara Grancieri do Amaral, Rodrigo Soares de Moura Neto, Clarissa Damaso, Rosane Silva                                                                                                |                                                                                                                                                                                                                                                                                                                                                                                                       |
| EPI_ISL_492040                                                                                                                                                                                                                                                                                                                                                                                                                                                                                                                                                                                 | Instituto de Biologia do Exército                                                                          | Laboratório Metabolismo Macromolecular FirminoTorres de Castro, Instituto de Biofísica Carlos Chagas Filho, Universidade Federal do Rio de Janeiro | Bianca Catarina Azevedo Cabral, Aline Rosa Vianna de Souza, Marcos Dornelas-Ribeiro, Tatiana LS Nogueira, Nádia Vaez Gonçalves da Cruz, Caleb GM Santos, Elizabeth Valentin, Marcio da Costa Cipitelli, Virginia Sara Grancieri do Amaral, Rodrigo Soares de Moura Neto, Clarissa Damaso, Rosane Silva                                                                                                |                                                                                                                                                                                                                                                                                                                                                                                                       |
| EPI_ISL_492041                                                                                                                                                                                                                                                                                                                                                                                                                                                                                                                                                                                 | Instituto de Biologia do Exército                                                                          | Laboratório Metabolismo Macromolecular FirminoTorres de Castro, Instituto de Biofísica Carlos Chagas Filho, Universidade Federal do Rio de Janeiro | Bianca Catarina Azevedo Cabral, Aline Rosa Vianna de Souza, Caleb GM Santos, Marcos Dornelas-Ribeiro, Tatiana LS Nogueira, Nádia Vaez Gonçalves da Cruz, Elizabeth Valentin, Marcio da Costa Cipitelli, Virginia Sara Grancieri do Amaral, Rodrigo Soares de Moura Neto, Clarissa Damaso, Rosane Silva                                                                                                |                                                                                                                                                                                                                                                                                                                                                                                                       |
| EPI_ISL_492042                                                                                                                                                                                                                                                                                                                                                                                                                                                                                                                                                                                 | Instituto de Biologia do Exército                                                                          | Laboratório Metabolismo Macromolecular FirminoTorres de Castro, Instituto de Biofísica Carlos Chagas Filho, Universidade Federal do Rio de Janeiro | Bianca Catarina Azevedo Cabral, Aline Rosa Vianna de Souza, Nádia Vaez Gonçalves da Cruz, Caleb GM Santos, Marcos Dornelas-Ribeiro, Tatiana LS Nogueira, Elizabeth Valentin, Marcio da Costa Cipitelli, Virginia Sara Grancieri do Amaral, Rodrigo Soares de Moura Neto, Clarissa Damaso, Rosane Silva                                                                                                |                                                                                                                                                                                                                                                                                                                                                                                                       |
| EPI_ISL_492043                                                                                                                                                                                                                                                                                                                                                                                                                                                                                                                                                                                 | Instituto de Biologia do Exército                                                                          | Laboratório Metabolismo Macromolecular FirminoTorres de Castro, Instituto de Biofísica Carlos Chagas Filho, Universidade Federal do Rio de Janeiro | Bianca Catarina Azevedo Cabral, Aline Rosa Vianna de Souza, Tatiana LS Nogueira, Nádia Vaez Gonçalves da Cruz, Caleb GM Santos, Marcos Dornelas-Ribeiro, Elizabeth Valentin, Marcio da Costa Cipitelli, Virginia Sara Grancieri do Amaral, Rodrigo Soares de Moura Neto, Clarissa Damaso, Rosane Silva                                                                                                |                                                                                                                                                                                                                                                                                                                                                                                                       |
| EPI_ISL_492044                                                                                                                                                                                                                                                                                                                                                                                                                                                                                                                                                                                 | Instituto de Biologia do Exército                                                                          | Laboratório Metabolismo Macromolecular FirminoTorres de Castro, Instituto de Biofísica Carlos Chagas Filho, Universidade Federal do Rio de Janeiro | Bianca Catarina Azevedo Cabral, Aline Rosa Vianna de Souza, Marcos Dornelas-Ribeiro, Tatiana LS Nogueira, Nádia Vaez Gonçalves da Cruz, Caleb GM Santos, Elizabeth Valentin, Marcio da Costa Cipitelli, Virginia Sara Grancieri do Amaral, Rodrigo Soares de Moura Neto, Clarissa Damaso, Rosane Silva                                                                                                |                                                                                                                                                                                                                                                                                                                                                                                                       |
| EPI_ISL_492045                                                                                                                                                                                                                                                                                                                                                                                                                                                                                                                                                                                 | Instituto de Biologia do Exército                                                                          | Laboratório Metabolismo Macromolecular FirminoTorres de Castro, Instituto de Biofísica Carlos Chagas Filho, Universidade Federal do Rio de Janeiro | Bianca Catarina Azevedo Cabral, Aline Rosa Vianna de Souza, Caleb GM Santos, Marcos Dornelas-Ribeiro, Tatiana LS Nogueira, Nádia Vaez Gonçalves da Cruz, Elizabeth Valentin, Marcio da Costa Cipitelli, Virginia Sara Grancieri do Amaral, Rodrigo Soares de Moura Neto, Clarissa Damaso, Rosane Silva                                                                                                |                                                                                                                                                                                                                                                                                                                                                                                                       |
| EPI_ISL_492046                                                                                                                                                                                                                                                                                                                                                                                                                                                                                                                                                                                 | Instituto de Biologia do Exército                                                                          | Laboratório Metabolismo Macromolecular FirminoTorres de Castro, Instituto de Biofísica Carlos Chagas Filho, Universidade Federal do Rio de Janeiro | Bianca Catarina Azevedo Cabral, Aline Rosa Vianna de Souza, Nádia Vaez Gonçalves da Cruz, Caleb GM Santos, Marcos Dornelas-Ribeiro, Tatiana LS Nogueira, Elizabeth Valentin, Marcio da Costa Cipitelli, Virginia Sara Grancieri do Amaral, Rodrigo Soares de Moura Neto, Clarissa Damaso, Rosane Silva                                                                                                |                                                                                                                                                                                                                                                                                                                                                                                                       |
| EPI_ISL_492047                                                                                                                                                                                                                                                                                                                                                                                                                                                                                                                                                                                 | Instituto de Biologia do Exército                                                                          | Laboratório Metabolismo Macromolecular FirminoTorres de Castro, Instituto de Biofísica Carlos Chagas Filho, Universidade Federal do Rio de Janeiro | Bianca Catarina Azevedo Cabral, Aline Rosa Vianna de Souza, Tatiana LS Nogueira, Nádia Vaez Gonçalves da Cruz, Caleb GM Santos, Marcos Dornelas-Ribeiro, Elizabeth Valentin, Marcio da Costa Cipitelli, Virginia Sara Grancieri do Amaral, Rodrigo Soares de Moura Neto, Clarissa Damaso, Rosane Silva                                                                                                |                                                                                                                                                                                                                                                                                                                                                                                                       |

|                                                                                                                                                                                                                                                                                                                                                                                                                                                                                                                                                                                                                                                                                                                                                                                                                                                                                                                                                                                                                |                                                                                                                     |                                                                                                                                                    |                                                                                                                                                                                                                                                                                                                                                                                                                                                                                                                                                                                                                                                                                                                                                                                                                                                           |
|----------------------------------------------------------------------------------------------------------------------------------------------------------------------------------------------------------------------------------------------------------------------------------------------------------------------------------------------------------------------------------------------------------------------------------------------------------------------------------------------------------------------------------------------------------------------------------------------------------------------------------------------------------------------------------------------------------------------------------------------------------------------------------------------------------------------------------------------------------------------------------------------------------------------------------------------------------------------------------------------------------------|---------------------------------------------------------------------------------------------------------------------|----------------------------------------------------------------------------------------------------------------------------------------------------|-----------------------------------------------------------------------------------------------------------------------------------------------------------------------------------------------------------------------------------------------------------------------------------------------------------------------------------------------------------------------------------------------------------------------------------------------------------------------------------------------------------------------------------------------------------------------------------------------------------------------------------------------------------------------------------------------------------------------------------------------------------------------------------------------------------------------------------------------------------|
| EPI_ISL_492048                                                                                                                                                                                                                                                                                                                                                                                                                                                                                                                                                                                                                                                                                                                                                                                                                                                                                                                                                                                                 | Instituto de Biologia do Exército                                                                                   | Laboratório Metabolismo Macromolecular FirminoTorres de Castro, Instituto de Biofísica Carlos Chagas Filho, Universidade Federal do Rio de Janeiro | Bianca Catarina Azevedo Cabral, Aline Rosa Vianna de Souza, Marcos Dornelas-Ribeiro, Tatiana LS Nogueira, Nádia Vaez Gonçalves da Cruz, Caleb GM Santos, Elizabeth Valentim, Marcio da Costa Cipitelli, Virgínia Sara Grançieri do Amaral, Rodrigo Soares de Moura Neto, Clárisa Damaso, Rosane Silva                                                                                                                                                                                                                                                                                                                                                                                                                                                                                                                                                     |
| EPI_ISL_500479                                                                                                                                                                                                                                                                                                                                                                                                                                                                                                                                                                                                                                                                                                                                                                                                                                                                                                                                                                                                 | LACEN/PE                                                                                                            | WallauLab, Aggeu Magalhaes Institute                                                                                                               | Marcelo Henrique Santos Paiva, Duschinka Ribeiro Duarte Guedes, Cássia Docena, Matheus Filgueira Bezerra, Filipe Zimmer Dezordi, Laís Ceschini Machado, Larissa Krokovsky, Elisama Helvecio, Alexandre Freitas da Silva, Luydson Richardson Silva Vasconcelos, Antonio Mauro Rezende, Severino Jefferson Ribeiro da Silva, Kamila Gaudêncio da Silva Sales, Bruna Santos Lima Figueiredo de Sá, Derciliano Lopes da Cruz, Claudio Eduardo Cavalcanti, Armando de Menezes Neto, Caroline Targino Alves da Silva, Renata Pessoa Germano Mendes, Maria Almerice Lopes da Silva, Tiago Gráf, Paola Cristina Resende, Gonzalo Bello, Michelle da Silva Barros, Wheverton Ricardo Correia do Nascimento, Rodrigo Moraes Loyo Arcoverde, Luciane Caroline Albuquerque Bezerra, Sivalva Pinto Brandão Filho, Constança Flávia Junqueira Ayres, Gabriel Luz Wallau |
| EPI_ISL_508822                                                                                                                                                                                                                                                                                                                                                                                                                                                                                                                                                                                                                                                                                                                                                                                                                                                                                                                                                                                                 | Florida Bureau of Public Health Laboratories                                                                        | Florida Bureau of Public Health Laboratories                                                                                                       | Sarah Schmedes, Jason Blanton                                                                                                                                                                                                                                                                                                                                                                                                                                                                                                                                                                                                                                                                                                                                                                                                                             |
| EPI_ISL_510535                                                                                                                                                                                                                                                                                                                                                                                                                                                                                                                                                                                                                                                                                                                                                                                                                                                                                                                                                                                                 | Molecular Virology, Instituto Carlos Chagas / Fiocruz Paraná                                                        | Universidade Federal do Parana (UFPR)                                                                                                              | Suzukawa,A., Tscha,M., Zanluca,C., Raboni,S., Duarte dos Santos,C.                                                                                                                                                                                                                                                                                                                                                                                                                                                                                                                                                                                                                                                                                                                                                                                        |
| EPI_ISL_511042, EPI_ISL_511043                                                                                                                                                                                                                                                                                                                                                                                                                                                                                                                                                                                                                                                                                                                                                                                                                                                                                                                                                                                 | Instituto Nacional de Saude (INSA)                                                                                  | Instituto Nacional de Saude (INSA)                                                                                                                 | Borges et al                                                                                                                                                                                                                                                                                                                                                                                                                                                                                                                                                                                                                                                                                                                                                                                                                                              |
| EPI_ISL_511190                                                                                                                                                                                                                                                                                                                                                                                                                                                                                                                                                                                                                                                                                                                                                                                                                                                                                                                                                                                                 | Instituto Nacional de Saude (INSA) and Instituto Gulbenkian de Ciencia (IGC)                                        | Instituto Nacional de Saude (INSA) and Instituto Gulbenkian de Ciencia (IGC)                                                                       | Borges et al                                                                                                                                                                                                                                                                                                                                                                                                                                                                                                                                                                                                                                                                                                                                                                                                                                              |
| EPI_ISL_511523                                                                                                                                                                                                                                                                                                                                                                                                                                                                                                                                                                                                                                                                                                                                                                                                                                                                                                                                                                                                 | Instituto Nacional de Saude (INSA)                                                                                  | Instituto Nacional de Saude (INSA)                                                                                                                 | Borges et al                                                                                                                                                                                                                                                                                                                                                                                                                                                                                                                                                                                                                                                                                                                                                                                                                                              |
| EPI_ISL_513316                                                                                                                                                                                                                                                                                                                                                                                                                                                                                                                                                                                                                                                                                                                                                                                                                                                                                                                                                                                                 | South Eastern Area Laboratory Services (SEALS)                                                                      | NSW Health Pathology - Institute of Clinical Pathology and Medical Research; Westmead Hospital; University of Sydney                               | CIDM-PH et al.                                                                                                                                                                                                                                                                                                                                                                                                                                                                                                                                                                                                                                                                                                                                                                                                                                            |
| EPI_ISL_513513, EPI_ISL_513515, EPI_ISL_513516, EPI_ISL_513517, EPI_ISL_513518, EPI_ISL_513519, EPI_ISL_513520, EPI_ISL_513521, EPI_ISL_513522, EPI_ISL_513523, EPI_ISL_513525, EPI_ISL_513526, EPI_ISL_513528, EPI_ISL_513530, EPI_ISL_513531, EPI_ISL_513533, EPI_ISL_513534, EPI_ISL_513535, EPI_ISL_513536, EPI_ISL_513537, EPI_ISL_513538, EPI_ISL_513540, EPI_ISL_513541, EPI_ISL_513542, EPI_ISL_513543, EPI_ISL_513544, EPI_ISL_513545, EPI_ISL_513547, EPI_ISL_513548, EPI_ISL_513549, EPI_ISL_513550, EPI_ISL_513551, EPI_ISL_513552, EPI_ISL_513553, EPI_ISL_513554, EPI_ISL_513555, EPI_ISL_513556, EPI_ISL_513558, EPI_ISL_513559, EPI_ISL_513560, EPI_ISL_513561, EPI_ISL_513562, EPI_ISL_513563, EPI_ISL_513564, EPI_ISL_513565, EPI_ISL_513566, EPI_ISL_513567, EPI_ISL_513568, EPI_ISL_513569, EPI_ISL_513570, EPI_ISL_513571, EPI_ISL_513572, EPI_ISL_513573, EPI_ISL_513574, EPI_ISL_513575, EPI_ISL_513576, EPI_ISL_513577, EPI_ISL_513579, EPI_ISL_513581, EPI_ISL_513582, EPI_ISL_513583 |                                                                                                                     |                                                                                                                                                    |                                                                                                                                                                                                                                                                                                                                                                                                                                                                                                                                                                                                                                                                                                                                                                                                                                                           |
| see above                                                                                                                                                                                                                                                                                                                                                                                                                                                                                                                                                                                                                                                                                                                                                                                                                                                                                                                                                                                                      | Programa de Oncovirologia, Instituto Nacional de Câncer                                                             | Programa de Oncovirologia, Instituto Nacional de Câncer                                                                                            | Juliana D. Siqueira, Livia R. Goes, Brunna M. Alves, Claudia Cicala,James Arthos, João P.B. Viola, Andreia C. de Melo, Marcelo A. Soares                                                                                                                                                                                                                                                                                                                                                                                                                                                                                                                                                                                                                                                                                                                  |
| EPI_ISL_514131                                                                                                                                                                                                                                                                                                                                                                                                                                                                                                                                                                                                                                                                                                                                                                                                                                                                                                                                                                                                 | Rondônia Central Public Health Laboratory (LACEN/RO), vinculated to State Health Secretariat of Rondônia (SESAU/RO) | Molecular Virology Laboratory of Oswaldo Cruz Foundation of Rondônia                                                                               | Luan Felipe Botelho-Souza, Felipe Souza Nogueira-Lima, Tércio Peixoto Roca, Alcione de Oliveira dos Santos, Felipe Gomes Naveca, Adriana Cristina Salvador Maia, Cicileia Correia da Silva, Aline Linhares Ferreira de Melo Mendonça, Celina Aparecida Bertoni Lugtenburg, Camila Flávia Gomes Azzi, Juliana Loca Furtado, Suelen Cavalcante, Rita de Cássia Pontello Rampazzo, Caio Henrique Nemeth Santos, Alice Paula Di Sabatino Guimarães, Jansen Fernandes de Medeiros, Fernando Rodrigues Máximo, Juan Miguel Vilallobos-Salcedo and Deusiene Souza Vieira1                                                                                                                                                                                                                                                                                        |
| EPI_ISL_514132                                                                                                                                                                                                                                                                                                                                                                                                                                                                                                                                                                                                                                                                                                                                                                                                                                                                                                                                                                                                 | Rondônia Central Public Health Laboratory (LACEN/RO), vinculated to State Health Secretariat of Rondônia (SESAU/RO) | Molecular Virology Laboratory of Oswaldo Cruz Foundation of Rondônia                                                                               | Luan Felipe Botelho-Souza, Felipe Souza Nogueira-Lima, Tércio Peixoto Roca, Alcione de Oliveira dos Santos, Felipe Gomes Naveca, Adriana Cristina Salvador Maia, Cicileia Correia da Silva, Aline Linhares Ferreira de Melo Mendonça, Celina Aparecida Bertoni Lugtenburg, Camila Flávia Gomes Azzi, Juliana Loca Furtado, Suelen Cavalcante, Rita de Cássia Pontello Rampazzo, Caio Henrique Nemeth Santos, Alice Paula Di Sabatino Guimarães, Jansen Fernandes de Medeiros, Fernando Rodrigues Máximo, Juan Miguel Vilallobos-Salcedo and Deusiene Souza Vieira.                                                                                                                                                                                                                                                                                        |
| EPI_ISL_514133, EPI_ISL_514135, EPI_ISL_514137, EPI_ISL_514138                                                                                                                                                                                                                                                                                                                                                                                                                                                                                                                                                                                                                                                                                                                                                                                                                                                                                                                                                 | Rondônia Central Public Health Laboratory (LACEN/RO), vinculated to State Health Secretariat of Rondônia (SESAU/RO) | Molecular Virology Laboratory of Oswaldo Cruz Foundation of Rondônia                                                                               | Luan Felipe Botelho-Souza, Felipe Souza Nogueira-Lima, Tércio Peixoto Roca, Alcione de Oliveira dos Santos, Felipe Gomes Naveca, Adriana Cristina Salvador Maia, Cicileia Correia da Silva, Aline Linhares Ferreira de Melo Mendonça, Celina Aparecida Bertoni Lugtenburg, Camila Flávia Gomes Azzi, Juliana Loca Furtado, Suelen Cavalcante, Rita de Cássia Pontello Rampazzo, Caio Henrique Nemeth Santos, Alice Paula Di Sabatino Guimarães, Jansen Fernandes de Medeiros, Fernando Rodrigues Máximo, Juan Miguel Vilallobos-Salcedo and Deusiene Souza Vieira                                                                                                                                                                                                                                                                                         |
| EPI_ISL_515521                                                                                                                                                                                                                                                                                                                                                                                                                                                                                                                                                                                                                                                                                                                                                                                                                                                                                                                                                                                                 | Hospital Municipal Dr Waldemar Tebaldi                                                                              | Instituto Adolfo Lutz, Interdisciplinary Procedures Center, Strategic Laboratory                                                                   | Claudio Tavares Sacchi, Claudia Regina Gonçalves, Erica Valessa Ramos Gomes                                                                                                                                                                                                                                                                                                                                                                                                                                                                                                                                                                                                                                                                                                                                                                               |
| EPI_ISL_515522                                                                                                                                                                                                                                                                                                                                                                                                                                                                                                                                                                                                                                                                                                                                                                                                                                                                                                                                                                                                 | UPA 24HS de Itatiba                                                                                                 | Instituto Adolfo Lutz, Interdisciplinary Procedures Center, Strategic Laboratory                                                                   | Claudio Tavares Sacchi, Claudia Regina Gonçalves, Erica Valessa Ramos Gomes                                                                                                                                                                                                                                                                                                                                                                                                                                                                                                                                                                                                                                                                                                                                                                               |
| EPI_ISL_515523                                                                                                                                                                                                                                                                                                                                                                                                                                                                                                                                                                                                                                                                                                                                                                                                                                                                                                                                                                                                 | PS Municipal Dr Lauro Ribas Braga                                                                                   | Instituto Adolfo Lutz, Interdisciplinary Procedures Center, Strategic Laboratory                                                                   | Claudio Tavares Sacchi, Claudia Regina Gonçalves, Erica Valessa Ramos Gomes                                                                                                                                                                                                                                                                                                                                                                                                                                                                                                                                                                                                                                                                                                                                                                               |
| EPI_ISL_515525                                                                                                                                                                                                                                                                                                                                                                                                                                                                                                                                                                                                                                                                                                                                                                                                                                                                                                                                                                                                 | National Influenza Center - Instituto Adolfo Lutz                                                                   | Instituto Adolfo Lutz, Interdisciplinary Procedures Center, Strategic Laboratory                                                                   | Claudio Tavares Sacchi, Claudia Regina Gonçalves, Erica Valessa Ramos Gomes                                                                                                                                                                                                                                                                                                                                                                                                                                                                                                                                                                                                                                                                                                                                                                               |
| EPI_ISL_515527                                                                                                                                                                                                                                                                                                                                                                                                                                                                                                                                                                                                                                                                                                                                                                                                                                                                                                                                                                                                 | Hospital Santa Clara                                                                                                | Instituto Adolfo Lutz, Interdisciplinary Procedures Center, Strategic Laboratory                                                                   | Claudio Tavares Sacchi, Claudia Regina Gonçalves, Erica Valessa Ramos Gomes                                                                                                                                                                                                                                                                                                                                                                                                                                                                                                                                                                                                                                                                                                                                                                               |
| EPI_ISL_515528                                                                                                                                                                                                                                                                                                                                                                                                                                                                                                                                                                                                                                                                                                                                                                                                                                                                                                                                                                                                 | Hospital Sao Paulo de Ensino da Unifesp                                                                             | Instituto Adolfo Lutz, Interdisciplinary Procedures Center, Strategic Laboratory                                                                   | Claudio Tavares Sacchi, Claudia Regina Gonçalves, Erica Valessa Ramos Gomes                                                                                                                                                                                                                                                                                                                                                                                                                                                                                                                                                                                                                                                                                                                                                                               |
| EPI_ISL_515543                                                                                                                                                                                                                                                                                                                                                                                                                                                                                                                                                                                                                                                                                                                                                                                                                                                                                                                                                                                                 | Serviço de Vigilância Sanitária e Epidemiológica                                                                    | Instituto Adolfo Lutz, Interdisciplinary Procedures Center, Strategic Laboratory                                                                   | Claudio Tavares Sacchi, Claudia Regina Gonçalves, Erica Valessa Ramos Gomes                                                                                                                                                                                                                                                                                                                                                                                                                                                                                                                                                                                                                                                                                                                                                                               |
| EPI_ISL_515550                                                                                                                                                                                                                                                                                                                                                                                                                                                                                                                                                                                                                                                                                                                                                                                                                                                                                                                                                                                                 | UPA Vila Santa Catarina                                                                                             | Instituto Adolfo Lutz, Interdisciplinary Procedures Center, Strategic Laboratory                                                                   | Claudio Tavares Sacchi, Claudia Regina Gonçalves, Erica Valessa Ramos Gomes                                                                                                                                                                                                                                                                                                                                                                                                                                                                                                                                                                                                                                                                                                                                                                               |
| EPI_ISL_518811                                                                                                                                                                                                                                                                                                                                                                                                                                                                                                                                                                                                                                                                                                                                                                                                                                                                                                                                                                                                 | Academic Hospital Paramaribo                                                                                        | Erasmus Medical Center                                                                                                                             | Bas Oude Munnink, Dion Gajadin, Ed Ijzerman, Emmanuelle Munger, Gary Gummels, Ingrid Krishnadath, Lycke Woititz, Marion Koopmans, Mireille Van de Veer, Princes Wongsowidjojo, Radjesh Ori, Rohma Banwari, Stephen Vreden                                                                                                                                                                                                                                                                                                                                                                                                                                                                                                                                                                                                                                 |
| EPI_ISL_523645                                                                                                                                                                                                                                                                                                                                                                                                                                                                                                                                                                                                                                                                                                                                                                                                                                                                                                                                                                                                 | Dutch COVID-19 response team                                                                                        | Erasmus Medical Center                                                                                                                             | Bas Oude Munnink, David Nieuwenhuijse, Reina Sikkema, Claudia Schapendonk, Irina Chestakova, Anne van der Linden, Theo Bestebroer, Stefan van Nieuwkoop, Mark Pronk, Pascal Lexmond, Corien Swaan, Manon Haverkate, Madelief Mollers, Mart Stein, Sandra Kengne Kamga Mobou, Jeroen van Kampen, Jolanda Voermans, Aura Timen, Corine GeurtsvanKessel, Annemiek van der Eijk, Richard Molenkamp, Marion Koopmans, on behalf of the Dutch national COVID-19 response team.                                                                                                                                                                                                                                                                                                                                                                                  |
| EPI_ISL_523920                                                                                                                                                                                                                                                                                                                                                                                                                                                                                                                                                                                                                                                                                                                                                                                                                                                                                                                                                                                                 | Viollier AG                                                                                                         | Department of Biosystems Science and Engineering, ETH Zürich                                                                                       | Christian Beisel, Sarah Nadeau, Ivan Topolsky, Pedro Ferreira, Philipp Jablonski, Susana Posada-Céspedes, Tobias Schär, Ina Nissen, Natascha Santacroce, Elodie Burcklen, Christiane Beckmann, Maurice Redondo, Olivier Kobel, Christoph Noppen, Sophie Seidel, Noemie Santamaria de Souza, Niko Beerwinkel, Tanja Stadler                                                                                                                                                                                                                                                                                                                                                                                                                                                                                                                                |
| EPI_ISL_523959                                                                                                                                                                                                                                                                                                                                                                                                                                                                                                                                                                                                                                                                                                                                                                                                                                                                                                                                                                                                 | Pronto Socorro Municipal de Perus                                                                                   | Instituto Adolfo Lutz, Interdisciplinary Procedures Center, Strategic Laboratory                                                                   | Claudio Tavares Sacchi, Claudia Regina Gonçalves, Erica Valessa Ramos Gomes                                                                                                                                                                                                                                                                                                                                                                                                                                                                                                                                                                                                                                                                                                                                                                               |
| EPI_ISL_523961                                                                                                                                                                                                                                                                                                                                                                                                                                                                                                                                                                                                                                                                                                                                                                                                                                                                                                                                                                                                 | Pronto Socorro Municipal 21 de Junho                                                                                | Instituto Adolfo Lutz, Interdisciplinary Procedures Center, Strategic Laboratory                                                                   | Claudio Tavares Sacchi, Claudia Regina Gonçalves, Erica Valessa Ramos Gomes                                                                                                                                                                                                                                                                                                                                                                                                                                                                                                                                                                                                                                                                                                                                                                               |
| EPI_ISL_523973                                                                                                                                                                                                                                                                                                                                                                                                                                                                                                                                                                                                                                                                                                                                                                                                                                                                                                                                                                                                 | PS Municipal Dona Maria Antonieta Ferreira de Barros                                                                | Instituto Adolfo Lutz, Interdisciplinary Procedures Center, Strategic Laboratory                                                                   | Claudio Tavares Sacchi, Claudia Regina Gonçalves, Erica Valessa Ramos Gomes                                                                                                                                                                                                                                                                                                                                                                                                                                                                                                                                                                                                                                                                                                                                                                               |
| EPI_ISL_523976                                                                                                                                                                                                                                                                                                                                                                                                                                                                                                                                                                                                                                                                                                                                                                                                                                                                                                                                                                                                 | Hospital Municipal do Tatuape Carmino Caricchio                                                                     | Instituto Adolfo Lutz, Interdisciplinary Procedures Center, Strategic Laboratory                                                                   | Claudio Tavares Sacchi, Claudia Regina Gonçalves, Erica Valessa Ramos Gomes                                                                                                                                                                                                                                                                                                                                                                                                                                                                                                                                                                                                                                                                                                                                                                               |
| EPI_ISL_523991, EPI_ISL_523992                                                                                                                                                                                                                                                                                                                                                                                                                                                                                                                                                                                                                                                                                                                                                                                                                                                                                                                                                                                 | Hospital Municipal Carmen Prudente                                                                                  | Instituto Adolfo Lutz, Interdisciplinary Procedures Center, Strategic Laboratory                                                                   | Claudio Tavares Sacchi, Claudia Regina Gonçalves, Erica Valessa Ramos Gomes                                                                                                                                                                                                                                                                                                                                                                                                                                                                                                                                                                                                                                                                                                                                                                               |
| EPI_ISL_524467                                                                                                                                                                                                                                                                                                                                                                                                                                                                                                                                                                                                                                                                                                                                                                                                                                                                                                                                                                                                 | Hospital Municipal Dr. Moisés Deutsch                                                                               | Instituto Adolfo Lutz, Interdisciplinary Procedures Center,                                                                                        | Claudio Tavares Sacchi, Claudia Regina Gonçalves, Erica Valessa Ramos Gomes                                                                                                                                                                                                                                                                                                                                                                                                                                                                                                                                                                                                                                                                                                                                                                               |

| Strategic Laboratory                                                                                                                                                                                                                                                           |                                                                                                     |                                                                                                     |                                                                                                                                                                                                                                                                                                                                                                                                           |
|--------------------------------------------------------------------------------------------------------------------------------------------------------------------------------------------------------------------------------------------------------------------------------|-----------------------------------------------------------------------------------------------------|-----------------------------------------------------------------------------------------------------|-----------------------------------------------------------------------------------------------------------------------------------------------------------------------------------------------------------------------------------------------------------------------------------------------------------------------------------------------------------------------------------------------------------|
| EPI_ISL_524470                                                                                                                                                                                                                                                                 | Hospital do Servidor Público Estadual Francisco Morato de Oliveira                                  | Instituto Adolfo Lutz, Interdisciplinary Procedures Center, Strategic Laboratory                    | Claudio Tavares Sacchi, Claudia Regina Gonçalves, Erica Valessa Ramos Gomes                                                                                                                                                                                                                                                                                                                               |
| EPI_ISL_524784, EPI_ISL_524788, EPI_ISL_524789, EPI_ISL_524790, EPI_ISL_524791, EPI_ISL_524792, EPI_ISL_524793, EPI_ISL_524794, EPI_ISL_524795, EPI_ISL_524796, EPI_ISL_524797, EPI_ISL_524798, EPI_ISL_524799                                                                 | see above                                                                                           | Evandro Chagas Institute                                                                            | Santos, M.C.; Silva, A.M.; Junior, W.D.C.; Barbagelata, L.S.; Ferreira, J.A.; Sousa, E.M.A.; da Silva, P.S.; Resque, H.R.; Martins, L.C.; Sousa Junior, E.C.; Viana, G.M.R                                                                                                                                                                                                                                |
| EPI_ISL_526267                                                                                                                                                                                                                                                                 | Unity Health Toronto                                                                                | Ontario Institute for Cancer Research                                                               | Ramzi Fattouh, Larissa M. Matukas, Mark Downing, Annette Gower, Karel Boissinot, Samira Mubareka, TIBDN, Ilina Lungu, Bernard Lam, Jeremy Johns, Paul Krzyzanowski, Richard de Borja, Felicia Vincelli, Philip Zuzarte, Jared Simpson                                                                                                                                                                     |
| EPI_ISL_526805                                                                                                                                                                                                                                                                 | Virginia DCLS                                                                                       | Virginia DCLS                                                                                       | Virginia DCLS                                                                                                                                                                                                                                                                                                                                                                                             |
| EPI_ISL_527012, EPI_ISL_527017                                                                                                                                                                                                                                                 | Area of Virology, Serology and Virology Division (SAVID), New South Wales Health Pathology Randwick | Area of Virology, Serology and Virology Division (SAVID), New South Wales Health Pathology Randwick | Rawlinson, W.                                                                                                                                                                                                                                                                                                                                                                                             |
| EPI_ISL_527858                                                                                                                                                                                                                                                                 | Pronto Atendimento Sancta Maggiore Jardim Paulista                                                  | Instituto Adolfo Lutz, Interdisciplinary Procedures Center, Strategic Laboratory                    | Claudio Tavares Sacchi, Claudia Regina Gonçalves, Erica Valessa Ramos Gomes                                                                                                                                                                                                                                                                                                                               |
| EPI_ISL_527864                                                                                                                                                                                                                                                                 | Hospital e Pronto Socorro Comunitário Vila Iolanda                                                  | Instituto Adolfo Lutz, Interdisciplinary Procedures Center, Strategic Laboratory                    | Claudio Tavares Sacchi, Claudia Regina Gonçalves, Erica Valessa Ramos Gomes                                                                                                                                                                                                                                                                                                                               |
| EPI_ISL_527867                                                                                                                                                                                                                                                                 | Pronto Socorro Municipal - Balneario São José                                                       | Instituto Adolfo Lutz, Interdisciplinary Procedures Center, Strategic Laboratory                    | Claudio Tavares Sacchi, Claudia Regina Gonçalves, Erica Valessa Ramos Gomes                                                                                                                                                                                                                                                                                                                               |
| EPI_ISL_527869                                                                                                                                                                                                                                                                 | Hospital Municipal Carmen Prudente                                                                  | Instituto Adolfo Lutz, Interdisciplinary Procedures Center, Strategic Laboratory                    | Claudio Tavares Sacchi, Claudia Regina Gonçalves, Erica Valessa Ramos Gomes                                                                                                                                                                                                                                                                                                                               |
| EPI_ISL_528465                                                                                                                                                                                                                                                                 | National Virus Reference Laboratory                                                                 | National Virus Reference Laboratory                                                                 | Michael Carr, Gabriel Gonzalez, Jonathan Dean, Suzie Coughlan, Cillian F De Gascun                                                                                                                                                                                                                                                                                                                        |
| EPI_ISL_528637, EPI_ISL_528638                                                                                                                                                                                                                                                 | LVM/UFRJ                                                                                            | Bioinformatics Laboratory / LNCC                                                                    | Gustavo D. P. Silva; M. Romário M. de Souza; Bruno B. Bezerra; Lucio A. Caldas; Fabio Limonte; Elena Cobos; Sharton V. A. Coelho; Luiz Almeida; Luiza Higga; Isadora A. Correa; Diana Marianni; Luciana B. Arruda; Marcelo Bozza; Orlando Ferreira; Wanderley de Souza; Ana Teresa R. Vasconcelos; Terezinha M. Castineiras; Amilcar Tanuri; Luciana J. Costa                                             |
| EPI_ISL_534312                                                                                                                                                                                                                                                                 | Distrito Sanitario Sul                                                                              | Instituto Adolfo Lutz, Interdisciplinary Procedures Center, Strategic Laboratory                    | Claudio Tavares Sacchi, Claudia Regina Gonçalves, Erica Valessa Ramos Gomes                                                                                                                                                                                                                                                                                                                               |
| EPI_ISL_534315                                                                                                                                                                                                                                                                 | Serviço de Verificação de Óbitos SVO Guarulhos                                                      | Instituto Adolfo Lutz, Interdisciplinary Procedures Center, Strategic Laboratory                    | Claudio Tavares Sacchi, Claudia Regina Gonçalves, Erica Valessa Ramos Gomes                                                                                                                                                                                                                                                                                                                               |
| EPI_ISL_534323                                                                                                                                                                                                                                                                 | Hospital e Pronto Socorro Comunitario Vila Yolanda                                                  | Instituto Adolfo Lutz, Interdisciplinary Procedures Center, Strategic Laboratory                    | Claudio Tavares Sacchi, Claudia Regina Gonçalves, Erica Valessa Ramos Gomes                                                                                                                                                                                                                                                                                                                               |
| EPI_ISL_534325                                                                                                                                                                                                                                                                 | Unidade de Vigilancia em Saude de Guarulhos                                                         | Instituto Adolfo Lutz, Interdisciplinary Procedures Center, Strategic Laboratory                    | Claudio Tavares Sacchi, Claudia Regina Gonçalves, Erica Valessa Ramos Gomes                                                                                                                                                                                                                                                                                                                               |
| EPI_ISL_536360                                                                                                                                                                                                                                                                 | Hôpital Pierre-Boucher                                                                              | Laboratoire de santé publique du Québec                                                             | Sandrine Moreira, Ioannis Ragoussis, Guillaume Bourque, Jesse Shapiro, Mark Lathrop and Michel Roger                                                                                                                                                                                                                                                                                                      |
| EPI_ISL_537598                                                                                                                                                                                                                                                                 | UCLA Pathology Clinical Microbiology Lab                                                            | Kruglyak Lab                                                                                        | Guo et al.                                                                                                                                                                                                                                                                                                                                                                                                |
| EPI_ISL_538348, EPI_ISL_538349                                                                                                                                                                                                                                                 | Kingston Health Sciences Centre / Queen's University                                                | Ontario Institute for Cancer Research                                                               | Prameet M. Sheth, Calvin Sjaarda, Robert Colautti, Katya Douchant, Ilina Lungu, Bernard Lam, Paul Krzyzanowski, Michael Laszloffy, Lawrence E Heisler, Richard de Borja, Jared T. Simpson                                                                                                                                                                                                                 |
| EPI_ISL_541038, EPI_ISL_541066                                                                                                                                                                                                                                                 | Hospital Clínico Universitario de Santiago de Compostela                                            | SeqCOVID-SPAIN consortium/Institute of Biomedicine of Valencia, IBV-CSIC                            | José Javier Costa Alcalde, Antonio Aguilera Guirao, M <sup>a</sup> Luisa Pérez del Molino Bernal, Amparo Coira Nieto, Gema Barbeito Castiñeiras, Rocio Trastoy Pena and SeqCOVID-SPAIN consortium                                                                                                                                                                                                         |
| EPI_ISL_541347, EPI_ISL_541348, EPI_ISL_541349, EPI_ISL_541350, EPI_ISL_541352, EPI_ISL_541353, EPI_ISL_541356, EPI_ISL_541357, EPI_ISL_541358, EPI_ISL_541360, EPI_ISL_541361, EPI_ISL_541362, EPI_ISL_541363, EPI_ISL_541364, EPI_ISL_541365, EPI_ISL_541367, EPI_ISL_541369 | see above                                                                                           | Laboratory of Respiratory Viruses and Measles, Oswaldo Cruz Institute, FIOCRUZ                      | Paola Resende, Luciana Appolinario, Fernando Motta, Anna Carolina Paixão, Ana Carolina Mendonça, Jonathan Lopes, Marilda Siqueira                                                                                                                                                                                                                                                                         |
| EPI_ISL_541370                                                                                                                                                                                                                                                                 | LACEN/SC                                                                                            | Laboratory of Respiratory Viruses and Measles, Oswaldo Cruz Institute, FIOCRUZ                      | Paola Resende, Luciana Appolinario, Fernando Motta, Anna Carolina Paixão, Ana Carolina Mendonça, Jonathan Lopes, Sandra Bianchini, Marilda Siqueira                                                                                                                                                                                                                                                       |
| EPI_ISL_541376, EPI_ISL_541382, EPI_ISL_541385, EPI_ISL_541388, EPI_ISL_541392                                                                                                                                                                                                 | LACEN/SE                                                                                            | Laboratory of Respiratory Viruses and Measles, Oswaldo Cruz Institute, FIOCRUZ                      | Paola Resende, Luciana Appolinario, Fernando Motta, Anna Carolina Paixão, Ana Carolina Mendonça, Jonathan Lopes, Clima Santos, Marilda Siqueira                                                                                                                                                                                                                                                           |
| EPI_ISL_541397, EPI_ISL_541398, EPI_ISL_541399                                                                                                                                                                                                                                 | Laboratório de Virologia Comparada e Ambiental-LVCA-IOC                                             | Laboratory of Respiratory Viruses and Measles, Oswaldo Cruz Institute, FIOCRUZ                      | Paola Resende, Luciana Appolinario, Tulio Machado Fumian, Tatiana Prado, Camille Ferreira Mannarino, Fernando Motta, Ana Carolina Mendonça, Marilda Siqueira, Marize Pereira Miagostovich                                                                                                                                                                                                                 |
| EPI_ISL_541509                                                                                                                                                                                                                                                                 | Viollier AG                                                                                         | Department of Biosystems Science and Engineering, ETH Zürich                                        | Christian Beisel, Sarah Nadeau, Ivan Topolsky, Pedro Ferreira, Philipp Jablonski, Susana Posada-Céspedes, Tobias Schär, Ina Nissen, Natascha Santacroce, Elodie Burcklen, Christiane Beckmann, Maurice Redondo, Olivier Kobel, Christoph Noppen, Sophie Seidel, Noemie Santamaria de Souza, Niko Beerewinkel, Tanja Stadler                                                                               |
| EPI_ISL_547570                                                                                                                                                                                                                                                                 | PS Municipal Dr Augusto Gomes de Mattos                                                             | Instituto Adolfo Lutz, Interdisciplinary Procedures Center, Strategic Laboratory                    | Claudio Tavares Sacchi, Claudia Regina Gonçalves, Erica Valessa Ramos Gomes, Karoline Rodrigues Campos                                                                                                                                                                                                                                                                                                    |
| EPI_ISL_547571                                                                                                                                                                                                                                                                 | Hospital Municipal Antônio Giglio                                                                   | Instituto Adolfo Lutz, Interdisciplinary Procedures Center, Strategic Laboratory                    | Claudio Tavares Sacchi, Claudia Regina Gonçalves, Erica Valessa Ramos Gomes, Karoline Rodrigues Campos                                                                                                                                                                                                                                                                                                    |
| EPI_ISL_547574                                                                                                                                                                                                                                                                 | Hospital Universitario da USP                                                                       | Instituto Adolfo Lutz, Interdisciplinary Procedures Center, Strategic Laboratory                    | Claudio Tavares Sacchi, Claudia Regina Gonçalves, Erica Valessa Ramos Gomes, Karoline Rodrigues Campos                                                                                                                                                                                                                                                                                                    |
| EPI_ISL_547578                                                                                                                                                                                                                                                                 | Hospital Doutor Domingos Leonardo Cerávolo                                                          | Instituto Adolfo Lutz, Interdisciplinary Procedures Center, Strategic Laboratory                    | Claudio Tavares Sacchi, Claudia Regina Gonçalves, Erica Valessa Ramos Gomes, Karoline Rodrigues Campos                                                                                                                                                                                                                                                                                                    |
| EPI_ISL_547580                                                                                                                                                                                                                                                                 | Santa Casa da Misericórdia de Presidente Prudente                                                   | Instituto Adolfo Lutz, Interdisciplinary Procedures Center, Strategic Laboratory                    | Claudio Tavares Sacchi, Claudia Regina Gonçalves, Erica Valessa Ramos Gomes, Karoline Rodrigues Campos                                                                                                                                                                                                                                                                                                    |
| EPI_ISL_548688, EPI_ISL_548689, EPI_ISL_548690, EPI_ISL_548691, EPI_ISL_548692, EPI_ISL_548698, EPI_ISL_548739, EPI_ISL_548803, EPI_ISL_548877, EPI_ISL_548878, EPI_ISL_548881                                                                                                 | see above                                                                                           | Public Health Ontario Laboratory                                                                    | Vanessa G Allen, Philip Banh, Richard de Borja, Yao Chen, Alireza Eshaghi, Nahuel Fittipaldi, Christine Frantz, Jonathan B Gubbay, Jennifer L Guthrie, Lawrence Heisler, Esha Joshi, Michael Laszloffy, Aimin Li, Michael CY Li, Dean Maxwell, Sandeep Nagra, Samir N Patel, Heather Rilkoof, Jared Simpson, Karthikeyan Sivaraman, Yogi Sundaravadanam, Sarah Teatero, Andre Villegas, Sandra Zittermann |
| EPI_ISL_561935                                                                                                                                                                                                                                                                 | Victorian Infectious Diseases Reference Laboratory (VIDRL)                                          | VIDRL and MDU-PHL                                                                                   | Caly, L., Seemann, T., Sait, M., Schultz, M. B., Druce J., Sherry, N.                                                                                                                                                                                                                                                                                                                                     |
| EPI_ISL_567224, EPI_ISL_567404, EPI_ISL_567526                                                                                                                                                                                                                                 | Lighthouse Lab in Glasgow                                                                           | Wellcome Sanger Institute for the COVID-19 Genomics UK (COG-UK) consortium                          | Harper VanSteenhouse, Yumi Kasai, David Gray, Carol Clugston, Anna Dominiczak and Alex Alderton, Roberto Amato, Sonia Goncalves, Ewan Harrison, David K. Jackson, Ian Johnston, Dominic Kwiatkowski, Cordelia Langford, John Sillitoe on behalf of the Wellcome Sanger Institute COVID-19 Surveillance Team                                                                                               |
| EPI_ISL_568790                                                                                                                                                                                                                                                                 | KEMRI-Wellcome Trust Research Programme/KEMRI-CGMR-C Kilifi                                         | KEMRI-Wellcome Trust Research Programme/KEMRI-CGMR-C Kilifi                                         | Githinji et al 2020                                                                                                                                                                                                                                                                                                                                                                                       |

|                                                                                |                                                                                                                                                                                                                     |                                                                                                        |                                                                                                                                                                                                                                                                                                                                                                                                                                                                                                                                                                                                                                                                                                                                                                                                                                                           |
|--------------------------------------------------------------------------------|---------------------------------------------------------------------------------------------------------------------------------------------------------------------------------------------------------------------|--------------------------------------------------------------------------------------------------------|-----------------------------------------------------------------------------------------------------------------------------------------------------------------------------------------------------------------------------------------------------------------------------------------------------------------------------------------------------------------------------------------------------------------------------------------------------------------------------------------------------------------------------------------------------------------------------------------------------------------------------------------------------------------------------------------------------------------------------------------------------------------------------------------------------------------------------------------------------------|
| EPI_ISL_569241                                                                 | MEPHI, Aix Marseille University                                                                                                                                                                                     | MEPHI, Aix Marseille University                                                                        | Anthony LEVASSEUR                                                                                                                                                                                                                                                                                                                                                                                                                                                                                                                                                                                                                                                                                                                                                                                                                                         |
| EPI_ISL_569988                                                                 | Unity Health Toronto                                                                                                                                                                                                | Ontario Institute for Cancer Research                                                                  | Ramzi Fattouh, Larissa M. Matukas, Yan Chen, Mark Downing, Trina Otterman, Karel Boissinot, Wai Sum Siu, Zhi Cui, Le Luu, Samira Mubareka, TIBDN, Ilina Lungu, Bernard Lam, Jeremy Johns, Paul Krzyzanowski, Richard de Borja, Felicia Vincelli, Philip Zuzarte, Jared T. Simpson                                                                                                                                                                                                                                                                                                                                                                                                                                                                                                                                                                         |
| EPI_ISL_571521, EPI_ISL_571522, EPI_ISL_571808                                 | Quest Diagnostics                                                                                                                                                                                                   | Quest Diagnostics                                                                                      | Rosenthal, S.H., Gerasimova, A., Kagan, R.M., Anderson, B., Grover, D., Livingston, K.E., Hua, M., Liu Y., Shalhout, D.F., Owen, R., Lacbawan, F.                                                                                                                                                                                                                                                                                                                                                                                                                                                                                                                                                                                                                                                                                                         |
| EPI_ISL_572364, EPI_ISL_572369, EPI_ISL_572377, EPI_ISL_572385                 | LACEN/PE                                                                                                                                                                                                            | WallauLab, Aggeu Magalhaes Institute                                                                   | Marcelo Henrique Santos Paiva, Duschinka Ribeiro Duarte Guedes, Cássia Docena, Matheus Filgueira Bezerra, Filipe Zimmer Dezordi, Laís Ceschini Machado, Larissa Krokovsky, Elisama Helvecio, Alexandre Freitas da Silva, Luydson Richardson Silva Vasconcelos, Antonio Mauro Rezende, Severino Jefferson Ribeiro da Silva, Kamila Gaudêncio da Silva Sales, Bruna Santos Lima Figueiredo de Sá, Derciliano Lopes da Cruz, Claudio Eduardo Cavalcanti, Armando de Menezes Neto, Caroline Targino Alves da Silva, Renata Pessoa Germano Mendes, Maria Almerice Lopes da Silva, Tiago Graf, Paola Cristina Resende, Gonzalo Bello, Michelle da Silva Barros, Wheverton Ricardo Correia do Nascimento, Rodrigo Moraes Loyo Arcoverde, Luciane Caroline Albuquerque Bezerra, Sinalva Pinto Brandão Filho, Constança Flávia Junqueira Ayres, Gabriel Luz Wallau |
| EPI_ISL_573249                                                                 | Virology Department, Royal Infirmary of Edinburgh, NHS Lothian / School of Biological Sciences, University of Edinburgh / Institute of Genetics and Molecular Medicine, University of Edinburgh                     | COVID-19 Genomics UK (COG-UK) Consortium                                                               | McHugh M, Dewar R, Rooke S, Gallagher M, Balcaza C, O'Toole Á, Scher E, Hill V, McCrone JT, Colquhoun R, Yu X, Jackson B, Rambaut A, Williams TC, Templeton K                                                                                                                                                                                                                                                                                                                                                                                                                                                                                                                                                                                                                                                                                             |
| EPI_ISL_573287                                                                 | Northumbria University / South Tees Hospitals NHS Foundation Trust / North Cumbria Integrated Care NHS Foundation Trust / North Tees and Hartlepool NHS Foundation Trust / Newcastle Hospitals NHS Foundation Trust | COVID-19 Genomics UK (COG-UK) Consortium                                                               | Darren L Smith, Andrew Nelson, Matthew Bashton, Greg R Young, Joshua Loh, John Allan, Mohammad A Tariq, Giles S Holt, Gary Black, Wen C Yew, Lynn Dover, Paul Baker, Steve Liggett, Sarah Essex, Jane Greenaway, Debra Padgett, Clive Graham, Garren Scott, Edward Barton, Emma Swindells, Brendan Payne, Jennifer Collins, Yusri Taha, Gary Eltringham                                                                                                                                                                                                                                                                                                                                                                                                                                                                                                   |
| EPI_ISL_574593, EPI_ISL_574596                                                 | CS II Dr. Antonio Vicoso Moreira de Rezende Sumare                                                                                                                                                                  | Instituto Adolfo Lutz, Interdisciplinary Procedures Center, Strategic Laboratory                       | Claudio Tavares Sacchi, Claudia Regina Gonçalves, Erica Valessa Ramos Gomes, Karoline Rodrigues Campos                                                                                                                                                                                                                                                                                                                                                                                                                                                                                                                                                                                                                                                                                                                                                    |
| EPI_ISL_578417, EPI_ISL_578451                                                 | Wisconsin State Laboratory of Hygiene Communicable Disease Division                                                                                                                                                 | Wisconsin State Laboratory of Hygiene Communicable Disease Division                                    | Kelsey R. Florek, Abigail C. Shockey                                                                                                                                                                                                                                                                                                                                                                                                                                                                                                                                                                                                                                                                                                                                                                                                                      |
| EPI_ISL_579245, EPI_ISL_579324                                                 | LabPLUS                                                                                                                                                                                                             | Institute of Environmental Science and Research (ESR)                                                  | Xiaoyun Ren, Matt Storey, Nikki Freed, Muhammad Faisal, Jing Wang, Hermes Perez, Anja Werno, Antje van der Linden, Arlo Upton, Chris Mansell, David Hammer, Dragana Drinkovic, Gary McAuliffe, Hana Sofia Andersson, James Ussher, Jill Sherwood, Julia Howard, Juliet Ely, Mary DeAlmeida, Matt Blakiston, Matthew Rogers, Max Bloomfield, Michael Addidle, Michelle Balm, Sally Roberts, Sarah Jefferies, Sharmini Muttiyah, Susan Morpeth, Susan Taylor, Timothy Blackmore, Vani Sathyendran, Veronica Playle, Virginia Hope, Erasmus Smit, Lauren Jelly, Olin Silander, Joep de Ligt                                                                                                                                                                                                                                                                  |
| EPI_ISL_583491                                                                 | Centro de Saude Esf IV Zona Rual Domingos de SJ Rio Pardo                                                                                                                                                           | Instituto Adolfo Lutz, Interdisciplinary Procedures Center, Strategic Laboratory                       | Claudio Tavares Sacchi, Claudia Regina Gonçalves, Erica Valessa Ramos Gomes, Karoline Rodrigues Campos                                                                                                                                                                                                                                                                                                                                                                                                                                                                                                                                                                                                                                                                                                                                                    |
| EPI_ISL_583493                                                                 | Vigilância em Saúde de Cajamar                                                                                                                                                                                      | Instituto Adolfo Lutz, Interdisciplinary Procedures Center, Strategic Laboratory                       | Claudio Tavares Sacchi, Claudia Regina Gonçalves, Erica Valessa Ramos Gomes, Karoline Rodrigues Campos                                                                                                                                                                                                                                                                                                                                                                                                                                                                                                                                                                                                                                                                                                                                                    |
| EPI_ISL_583495                                                                 | Serviço de Verificação de Óbitos SVO Guarulhos                                                                                                                                                                      | Instituto Adolfo Lutz, Interdisciplinary Procedures Center, Strategic Laboratory                       | Claudio Tavares Sacchi, Claudia Regina Gonçalves, Erica Valessa Ramos Gomes, Karoline Rodrigues Campos                                                                                                                                                                                                                                                                                                                                                                                                                                                                                                                                                                                                                                                                                                                                                    |
| EPI_ISL_583762                                                                 | Dr. Gernot Walder GmbH                                                                                                                                                                                              | Bergthaler laboratory, CeMM Research Center for Molecular Medicine of the Austrian Academy of Sciences | Alexandra Popa, Benedikt Agerer, Henrique Colaco, Lukas Endler, Jakob-Wendelin Genger, Alexander Lercher, Mark Smyth, Thomas Penz, Michael Schuster, Jan Laine, Martin Senekowitsch, Judith Aberle, Stephan Aberle, Peter Hufnagl, Daniela Schmid, Franz Allerberger, Elisabeth Puchhammer-Stoeckl, Manfred Nairz, Guenter Weiss, Gregor Hörmann, Kinga Rigler-Hohenwarter, Rainer Gattringer, Wegene Borena, Dorothee von Laer, Gernot Walder, Peter Obrist, Christian Paar, Sabine Sussitz-Rack, Gunther Vogl, Adi Steinrigl, Christoph Bock, Andreas Bergthaler                                                                                                                                                                                                                                                                                        |
| EPI_ISL_584058                                                                 | Respiratory Virus Unit, Microbiology Services Colindale, Public Health England                                                                                                                                      | Respiratory Virus Unit, Microbiology Services Colindale, Public Health England                         | PHE Covid Sequencing Team                                                                                                                                                                                                                                                                                                                                                                                                                                                                                                                                                                                                                                                                                                                                                                                                                                 |
| EPI_ISL_586379                                                                 | Toronto Invasive Bacterial Diseases Network                                                                                                                                                                         | McMaster University                                                                                    | Allison McGeer, Patryk Aftanas, Hooman Derakhshani, Angel Li, Kuganya Nirmalarajah, Emily Panousis, Ahmed Draia, Jalees Nasir, Michael Surette, Samira Mubareka, Andrew G. McArthur                                                                                                                                                                                                                                                                                                                                                                                                                                                                                                                                                                                                                                                                       |
| EPI_ISL_587521                                                                 | Lighthouse Lab in Glasgow                                                                                                                                                                                           | Wellcome Sanger Institute for the COVID-19 Genomics UK (COG-UK) consortium                             | Harper VanSteenhouse, Yumi Kasai, David Gray, Carol Clugston, Anna Dominiczak and Alex Alderton, Roberto Amato, Sonia Goncalves, Ewan Harrison, David K. Jackson, Ian Johnston, Dominic Kwiatkowski, Cordelia Langford, John Sillitoe on behalf of the Wellcome Sanger Institute COVID-19 Surveillance Team                                                                                                                                                                                                                                                                                                                                                                                                                                                                                                                                               |
| EPI_ISL_590662                                                                 | Lighthouse Lab in Glasgow                                                                                                                                                                                           | Wellcome Sanger Institute for the COVID-19 Genomics UK (COG-UK) consortium                             | Harper VanSteenhouse, Yumi Kasai, David Gray, Carol Clugston, Anna Dominiczak and Alex Alderton, Roberto Amato, Sonia Goncalves, Ewan Harrison, David K. Jackson, Ian Johnston, Dominic Kwiatkowski, Cordelia Langford, John Sillitoe on behalf of the Wellcome Sanger Institute COVID-19 Surveillance Team ( <a href="http://www.sanger.ac.uk/covid-team">http://www.sanger.ac.uk/covid-team</a> )                                                                                                                                                                                                                                                                                                                                                                                                                                                       |
| EPI_ISL_591163, EPI_ISL_591234                                                 | Toronto Invasive Bacterial Diseases Network                                                                                                                                                                         | McMaster University                                                                                    | Allison McGeer, Patryk Aftanas, Hooman Derakhshani, Angel Li, Kuganya Nirmalarajah, Emily Panousis, Ahmed Draia, Jalees Nasir, Michael Surette, Samira Mubareka, Andrew G. McArthur                                                                                                                                                                                                                                                                                                                                                                                                                                                                                                                                                                                                                                                                       |
| EPI_ISL_591369, EPI_ISL_591370, EPI_ISL_591371, EPI_ISL_591389, EPI_ISL_591390 | Pathogen Genomics Center, National Institute of Infectious Diseases                                                                                                                                                 | Pathogen Genomics Center, National Institute of Infectious Diseases                                    | Tsuyoshi Sekizuka, Kentaro Itokawa, Rina Tanaka, Masanori Hashino, Makoto Kuroda                                                                                                                                                                                                                                                                                                                                                                                                                                                                                                                                                                                                                                                                                                                                                                          |
| EPI_ISL_591523                                                                 | Medicina Norte U Chile - Servicio Medico Legal                                                                                                                                                                      | Center for Mathematical Modeling and Center for Genome Regulation. Santiago, Chile                     | Gaggero A, Valiente F, Gaete A, Travisany D, Palma R, Urra C, Varas M, Allende ML, Maass A, González M, Ferrer M.                                                                                                                                                                                                                                                                                                                                                                                                                                                                                                                                                                                                                                                                                                                                         |
| EPI_ISL_591534                                                                 | Laboratorio de Infectologia y virologia molecular                                                                                                                                                                   | Center for Mathematical Modeling and Center for Genome Regulation. Santiago, Chile                     | Valiente F, Gaete A, Travisany D, Palma R, Urra C, Varas M, Allende ML, Maass A, González M, Ferrer M.                                                                                                                                                                                                                                                                                                                                                                                                                                                                                                                                                                                                                                                                                                                                                    |
| EPI_ISL_593615                                                                 | unknown                                                                                                                                                                                                             | Public Health Virology Laboratory, Forensic and Scientific Services (PHV-FSS)                          | Son Nguyen et al.                                                                                                                                                                                                                                                                                                                                                                                                                                                                                                                                                                                                                                                                                                                                                                                                                                         |
| EPI_ISL_594371, EPI_ISL_594383                                                 | Florida Bureau of Public Health Laboratories                                                                                                                                                                        | Florida Bureau of Public Health Laboratories                                                           | Sarah Schmedes, Jason Blanton                                                                                                                                                                                                                                                                                                                                                                                                                                                                                                                                                                                                                                                                                                                                                                                                                             |
| EPI_ISL_599356                                                                 | Lighthouse Lab in Glasgow                                                                                                                                                                                           | Wellcome Sanger Institute for the COVID-19 Genomics UK (COG-UK) consortium                             | Harper VanSteenhouse, Yumi Kasai, David Gray, Carol Clugston, Anna Dominiczak and Alex Alderton, Roberto Amato, Sonia Goncalves, Ewan Harrison, David K. Jackson, Ian Johnston, Dominic Kwiatkowski, Cordelia Langford, John Sillitoe on behalf of the Wellcome Sanger Institute COVID-19 Surveillance Team ( <a href="http://www.sanger.ac.uk/covid-team">http://www.sanger.ac.uk/covid-team</a> )                                                                                                                                                                                                                                                                                                                                                                                                                                                       |
| EPI_ISL_603025                                                                 | UPA Central de Caraguatatuba                                                                                                                                                                                        | Instituto Adolfo Lutz, Interdisciplinary Procedures Center, Strategic Laboratory                       | Claudio Tavares Sacchi, Claudia Regina Gonçalves, Erica Valessa Ramos Gomes, Karoline Rodrigues Campos                                                                                                                                                                                                                                                                                                                                                                                                                                                                                                                                                                                                                                                                                                                                                    |
| EPI_ISL_603026                                                                 | Santa Casa da Misericórdia de Presidente Prudente                                                                                                                                                                   | Instituto Adolfo Lutz, Interdisciplinary Procedures Center, Strategic Laboratory                       | Claudio Tavares Sacchi, Claudia Regina Gonçalves, Erica Valessa Ramos Gomes, Karoline Rodrigues Campos                                                                                                                                                                                                                                                                                                                                                                                                                                                                                                                                                                                                                                                                                                                                                    |
| EPI_ISL_603029                                                                 | Hospital Municipal Mário Gatti                                                                                                                                                                                      | Instituto Adolfo Lutz, Interdisciplinary Procedures Center, Strategic Laboratory                       | Claudio Tavares Sacchi, Claudia Regina Gonçalves, Erica Valessa Ramos Gomes, Karoline Rodrigues Campos                                                                                                                                                                                                                                                                                                                                                                                                                                                                                                                                                                                                                                                                                                                                                    |
| EPI_ISL_603031                                                                 | Santa Casa de Presidente Epitácio                                                                                                                                                                                   | Instituto Adolfo Lutz, Interdisciplinary Procedures Center, Strategic Laboratory                       | Claudio Tavares Sacchi, Claudia Regina Gonçalves, Erica Valessa Ramos Gomes, Karoline Rodrigues Campos                                                                                                                                                                                                                                                                                                                                                                                                                                                                                                                                                                                                                                                                                                                                                    |
| EPI_ISL_603032                                                                 | Santa Casa da Misericórdia de Presidente Prudente                                                                                                                                                                   | Instituto Adolfo Lutz, Interdisciplinary Procedures Center, Strategic Laboratory                       | Claudio Tavares Sacchi, Claudia Regina Gonçalves, Erica Valessa Ramos Gomes, Karoline Rodrigues Campos                                                                                                                                                                                                                                                                                                                                                                                                                                                                                                                                                                                                                                                                                                                                                    |
| EPI_ISL_603039                                                                 | Hospital Municipal Mário Gatti                                                                                                                                                                                      | Instituto Adolfo Lutz, Interdisciplinary Procedures Center, Strategic Laboratory                       | Claudio Tavares Sacchi, Claudia Regina Gonçalves, Erica Valessa Ramos Gomes, Karoline Rodrigues Campos                                                                                                                                                                                                                                                                                                                                                                                                                                                                                                                                                                                                                                                                                                                                                    |

|                                                                                                                                                                                                                                                                                                                                                                                                                                                                                                                                                                                                                                                                                                                                                                                                                                                                                                                                |                                                                                                                                                        |                                                                                                                                 |                                                                                                                                                                                                                                                                                                                                                                                                           |
|--------------------------------------------------------------------------------------------------------------------------------------------------------------------------------------------------------------------------------------------------------------------------------------------------------------------------------------------------------------------------------------------------------------------------------------------------------------------------------------------------------------------------------------------------------------------------------------------------------------------------------------------------------------------------------------------------------------------------------------------------------------------------------------------------------------------------------------------------------------------------------------------------------------------------------|--------------------------------------------------------------------------------------------------------------------------------------------------------|---------------------------------------------------------------------------------------------------------------------------------|-----------------------------------------------------------------------------------------------------------------------------------------------------------------------------------------------------------------------------------------------------------------------------------------------------------------------------------------------------------------------------------------------------------|
| EPI_ISL_608745                                                                                                                                                                                                                                                                                                                                                                                                                                                                                                                                                                                                                                                                                                                                                                                                                                                                                                                 | Lighthouse Lab in Milton Keynes                                                                                                                        | Wellcome Sanger Institute for the COVID-19 Genomics UK (COG-UK) consortium                                                      | The Lighthouse Lab in Milton Keynes and Alex Alderton, Roberto Amato, Sonia Goncalves, Ewan Harrison, David K. Jackson, Ian Johnston, Dominic Kwiatkowski, Cordelia Langford, John Sillitoe on behalf of the Wellcome Sanger Institute COVID-19 Surveillance Team                                                                                                                                         |
| EPI_ISL_610122, EPI_ISL_610123, EPI_ISL_610130                                                                                                                                                                                                                                                                                                                                                                                                                                                                                                                                                                                                                                                                                                                                                                                                                                                                                 | Virginia DCLS                                                                                                                                          | Virginia DCLS                                                                                                                   | Virginia DCLS                                                                                                                                                                                                                                                                                                                                                                                             |
| EPI_ISL_613563, EPI_ISL_613564, EPI_ISL_613707, EPI_ISL_613708                                                                                                                                                                                                                                                                                                                                                                                                                                                                                                                                                                                                                                                                                                                                                                                                                                                                 | Laboratory of Molecular Biology, Blood Center of Ribeirão Preto                                                                                        | Laboratory of Molecular Biology, Blood Center of Ribeirão Preto, Faculty of Medicine of Ribeirão Preto, University of São Paulo | Svetoslav N Slavov, Marta Giovanetti, Vagner Fonseca, Elaine V Santos, Evandra S Rodrigues, Talita Adelino, Jolison Xavier, Glauco de Carvalho Pereira, Aparecida Y Yamamoto, Diego Villa Clé, Rodrigo T Calado; Dimas T Covas, Luiz CJ Alcantara, Simone Kashima                                                                                                                                         |
| EPI_ISL_613709, EPI_ISL_613711, EPI_ISL_613951, EPI_ISL_613952, EPI_ISL_613954, EPI_ISL_613956, EPI_ISL_613961, EPI_ISL_613962                                                                                                                                                                                                                                                                                                                                                                                                                                                                                                                                                                                                                                                                                                                                                                                                 | Laboratory of Molecular Biology, Blood Center of Ribeirão Preto, Faculty of Medicine of Ribeirão Preto, University of São Paulo                        | Laboratory of Molecular Biology, Blood Center of Ribeirão Preto, Faculty of Medicine of Ribeirão Preto, University of São Paulo | Svetoslav N Slavov, Marta Giovanetti, Vagner Fonseca, Elaine V Santos, Evandra S Rodrigues, Talita Adelino, Jolison Xavier, Glauco de Carvalho Pereira, Aparecida Y Yamamoto, Diego Villa Clé, Rodrigo T Calado; Dimas T Covas, Luiz CJ Alcantara, Simone Kashima                                                                                                                                         |
| EPI_ISL_617424                                                                                                                                                                                                                                                                                                                                                                                                                                                                                                                                                                                                                                                                                                                                                                                                                                                                                                                 | Department of Virus and Microbiological Special Diagnostics, Statens Serum Institut, Denmark                                                           | Albertsen lab, Department of Chemistry and Bioscience, Aalborg University, Denmark                                              | Danish Covid-19 Genome Consortia                                                                                                                                                                                                                                                                                                                                                                          |
| EPI_ISL_623104, EPI_ISL_623105                                                                                                                                                                                                                                                                                                                                                                                                                                                                                                                                                                                                                                                                                                                                                                                                                                                                                                 | Simile Medicina Diagnóstica                                                                                                                            | Bioinformatics Laboratory / LNCC                                                                                                | Carolina M Voloch, Ronaldo S Francisco Jr, Luiz G P de Almeida, Otavio J. Brustolini, Cynthia C Cardoso, Alexandra L Gerber, Ana Paula de C Guimarães, Diana Mariani, Covid19-UFRJ Workgroup, Luís Cristóvão Pôrto, Renato S Aguiar, Terezinha M P P Castilheiras, Orlando C. Ferreira, Amilcar Tanuri, Ana Tereza R de Vasconcelos                                                                       |
| EPI_ISL_623106, EPI_ISL_623107, EPI_ISL_623108, EPI_ISL_623109, EPI_ISL_623110, EPI_ISL_623111, EPI_ISL_623112, EPI_ISL_623113, EPI_ISL_623114, EPI_ISL_623115, EPI_ISL_623116, EPI_ISL_623117, EPI_ISL_623118, EPI_ISL_623119, EPI_ISL_623120, EPI_ISL_623121, EPI_ISL_623124, EPI_ISL_623125, EPI_ISL_623126, EPI_ISL_623127, EPI_ISL_623128, EPI_ISL_623129, EPI_ISL_623132, EPI_ISL_623133, EPI_ISL_623134, EPI_ISL_623135, EPI_ISL_623140, EPI_ISL_623141, EPI_ISL_623142, EPI_ISL_623143, EPI_ISL_623144, EPI_ISL_623145, EPI_ISL_623146, EPI_ISL_623147, EPI_ISL_623148, EPI_ISL_623149, EPI_ISL_623150, EPI_ISL_623151, EPI_ISL_623152, EPI_ISL_623153, EPI_ISL_623154, EPI_ISL_623155, EPI_ISL_623156, EPI_ISL_623157, EPI_ISL_623158, EPI_ISL_623159, EPI_ISL_623160, EPI_ISL_623161, EPI_ISL_623162, EPI_ISL_623163, EPI_ISL_623164, EPI_ISL_623165, EPI_ISL_623166, EPI_ISL_623167, EPI_ISL_623168, EPI_ISL_623169 | Laboratório de Virologia Molecular / UFRJ                                                                                                              | Bioinformatics Laboratory / LNCC                                                                                                | Carolina M Voloch, Ronaldo S Francisco Jr, Luiz G P de Almeida, Otavio J. Brustolini, Cynthia C Cardoso, Alexandra L Gerber, Ana Paula de C Guimarães, Diana Mariani, Covid19-UFRJ Workgroup, Luís Cristóvão Pôrto, Renato S Aguiar, Terezinha M P P Castilheiras, Orlando C. Ferreira, Amilcar Tanuri, Ana Tereza R de Vasconcelos                                                                       |
| EPI_ISL_626554                                                                                                                                                                                                                                                                                                                                                                                                                                                                                                                                                                                                                                                                                                                                                                                                                                                                                                                 | Laboratório de Biología Molecular, Facultad de Medicina, Universidad de Atacama, Copiapo, Chile/ FONDAP CRG, Universidad Andrés Bello, Santiago, Chile | Center for Mathematical Modeling and Center for Genome Regulation. Santiago, Chile                                              | Echeverría C, Manríquez R, Bastias M, Sanhueza D, Travisany D, Allende ML, Maass A, González M, Montecino, M, Orellana A, Castro E, Meneses C.                                                                                                                                                                                                                                                            |
| EPI_ISL_629012, EPI_ISL_629018, EPI_ISL_629022                                                                                                                                                                                                                                                                                                                                                                                                                                                                                                                                                                                                                                                                                                                                                                                                                                                                                 | Centro de Biotecnología Vegetal, Universidad Andrés Bello, Center for Genome Regulation                                                                | Center for Mathematical Modeling and Center for Genome Regulation. Santiago, Chile                                              | Bastias M, Sanhueza D, Travisany D, Allende ML, Maass A, González M, Bustos F, Arriagada G, Montecino, M, Orellana A, Castro E, Meneses C.                                                                                                                                                                                                                                                                |
| EPI_ISL_636737, EPI_ISL_636835, EPI_ISL_636836, EPI_ISL_636837, EPI_ISL_636838                                                                                                                                                                                                                                                                                                                                                                                                                                                                                                                                                                                                                                                                                                                                                                                                                                                 | Laboratório de Imunofarmacologia - Instituto Oswaldo Cruz                                                                                              | Laboratório de Imunofarmacologia - Instituto Oswaldo Cruz                                                                       | Souza,T.M., Fintelman-Rodrigues.N., De Paula,A.D., Saraiva,F.B., Ferreira,M.A. and Sacramento,C.Q.                                                                                                                                                                                                                                                                                                        |
| EPI_ISL_639775, EPI_ISL_639787                                                                                                                                                                                                                                                                                                                                                                                                                                                                                                                                                                                                                                                                                                                                                                                                                                                                                                 | unknown                                                                                                                                                | Public Health Virology Laboratory, Forensic and Scientific Services (PHV-FSS)                                                   | Son Nguyen et al.                                                                                                                                                                                                                                                                                                                                                                                         |
| EPI_ISL_648218                                                                                                                                                                                                                                                                                                                                                                                                                                                                                                                                                                                                                                                                                                                                                                                                                                                                                                                 | INBIRS-UBA                                                                                                                                             | Laboratorio Mixto de Biotecnología Acuática (LMBA)                                                                              | Joaquín Ezpeleta, Ignacio García Labari, Victoria Posner, Vanina Villanova, Pablo Casal, Sofía Lavista Llanos, Federico Remes Lenicov, Ana Paletta, Flavio Spetale, Agustina Cerri, Silvana Spinelli, Elisa Bolatti, Diego Chouhy, María Re, Gastón Viarengo, Ana Cavatorra, Julian Acosta, Javier Murillo, Laura Angelone, Leandro Ciappina, Pilar Bulacio, Adriana Giri, Silvia Arranz, Elizabeth Tapia |
| EPI_ISL_653160, EPI_ISL_653168, EPI_ISL_666862                                                                                                                                                                                                                                                                                                                                                                                                                                                                                                                                                                                                                                                                                                                                                                                                                                                                                 | Florida Bureau of Public Health Laboratories                                                                                                           | Florida Bureau of Public Health Laboratories                                                                                    | Sarah Schmedes, Jason Blanton                                                                                                                                                                                                                                                                                                                                                                             |
| EPI_ISL_671903                                                                                                                                                                                                                                                                                                                                                                                                                                                                                                                                                                                                                                                                                                                                                                                                                                                                                                                 | National Virus Reference Laboratory                                                                                                                    | National Virus Reference Laboratory                                                                                             | Michael Carr, Gabriel Gonzalez, Jonathan Dean, Daniel Hare, Cillian F De Gascun                                                                                                                                                                                                                                                                                                                           |
| EPI_ISL_672664, EPI_ISL_672665, EPI_ISL_672666, EPI_ISL_672667, EPI_ISL_672668                                                                                                                                                                                                                                                                                                                                                                                                                                                                                                                                                                                                                                                                                                                                                                                                                                                 | DB Diagnosticos do Brasil                                                                                                                              | Laboratório de Parasitologia Médica - Instituto de Medicina Tropical - Universidade de São Paulo                                | Brazil-UK Centre for Arbovirus Discovery Diagnosis Genomics and Epidemiology (CADDE) Genomic Network - Instituto de Medicina Tropical                                                                                                                                                                                                                                                                     |
| EPI_ISL_672669                                                                                                                                                                                                                                                                                                                                                                                                                                                                                                                                                                                                                                                                                                                                                                                                                                                                                                                 | Hospital das Clínicas da Faculdade de Medicina da Universidade de São Paulo (HC-FMUSP)                                                                 | Laboratório de Parasitologia Médica - Instituto de Medicina Tropical - Universidade de São Paulo                                | Brazil-UK Centre for Arbovirus Discovery Diagnosis Genomics and Epidemiology (CADDE) Genomic Network - Instituto de Medicina Tropical                                                                                                                                                                                                                                                                     |
| EPI_ISL_672671, EPI_ISL_672674, EPI_ISL_672675, EPI_ISL_672679, EPI_ISL_672681, EPI_ISL_672683, EPI_ISL_672684                                                                                                                                                                                                                                                                                                                                                                                                                                                                                                                                                                                                                                                                                                                                                                                                                 | DB Diagnosticos do Brasil                                                                                                                              | Laboratório de Parasitologia Médica - Instituto de Medicina Tropical - Universidade de São Paulo                                | Brazil-UK Centre for Arbovirus Discovery Diagnosis Genomics and Epidemiology (CADDE) Genomic Network - Instituto de Medicina Tropical                                                                                                                                                                                                                                                                     |
| EPI_ISL_672696                                                                                                                                                                                                                                                                                                                                                                                                                                                                                                                                                                                                                                                                                                                                                                                                                                                                                                                 | Hospital das Clínicas da Faculdade de Medicina da Universidade de São Paulo (HC-FMUSP)                                                                 | Laboratório de Parasitologia Médica - Instituto de Medicina Tropical - Universidade de São Paulo                                | Brazil-UK Centre for Arbovirus Discovery Diagnosis Genomics and Epidemiology (CADDE) Genomic Network - Instituto de Medicina Tropical                                                                                                                                                                                                                                                                     |
| EPI_ISL_672709, EPI_ISL_672712                                                                                                                                                                                                                                                                                                                                                                                                                                                                                                                                                                                                                                                                                                                                                                                                                                                                                                 | Institute of Tropical Medicine at the University of São Paulo (IMT-USP)                                                                                | Laboratório de Parasitologia Médica - Instituto de Medicina Tropical - Universidade de São Paulo                                | Brazil-UK Centre for Arbovirus Discovery Diagnosis Genomics and Epidemiology (CADDE) Genomic Network - Instituto de Medicina Tropical                                                                                                                                                                                                                                                                     |
| EPI_ISL_672723, EPI_ISL_672728, EPI_ISL_672731, EPI_ISL_672736, EPI_ISL_672737, EPI_ISL_672744                                                                                                                                                                                                                                                                                                                                                                                                                                                                                                                                                                                                                                                                                                                                                                                                                                 | Hospital das Clínicas da Faculdade de Medicina da Universidade de São Paulo (HC-FMUSP)                                                                 | Laboratório de Parasitologia Médica - Instituto de Medicina Tropical - Universidade de São Paulo                                | Brazil-UK Centre for Arbovirus Discovery Diagnosis Genomics and Epidemiology (CADDE) Genomic Network - Instituto de Medicina Tropical                                                                                                                                                                                                                                                                     |
| EPI_ISL_672746, EPI_ISL_672751                                                                                                                                                                                                                                                                                                                                                                                                                                                                                                                                                                                                                                                                                                                                                                                                                                                                                                 | Institute of Tropical Medicine at the University of São Paulo (IMT-USP)                                                                                | Laboratório de Parasitologia Médica - Instituto de Medicina Tropical - Universidade de São Paulo                                | Brazil-UK Centre for Arbovirus Discovery Diagnosis Genomics and Epidemiology (CADDE) Genomic Network - Instituto de Medicina Tropical                                                                                                                                                                                                                                                                     |
| EPI_ISL_683446                                                                                                                                                                                                                                                                                                                                                                                                                                                                                                                                                                                                                                                                                                                                                                                                                                                                                                                 | Texas Department of State Health Services                                                                                                              | Texas Department of State Health Services                                                                                       | Rashmi Tuladhar, Bonnie Oh, Jenny Zhang, Maliha Rahman, Anita Pokharel, Myong Koag, Chung Wang, Rachel Lee, Grace Kubin, Mayela Pedrueza, James Daniel Bonser                                                                                                                                                                                                                                             |
| EPI_ISL_684859                                                                                                                                                                                                                                                                                                                                                                                                                                                                                                                                                                                                                                                                                                                                                                                                                                                                                                                 | Pathogen Genomics Center, National Institute of Infectious Diseases                                                                                    | Pathogen Genomics Center, National Institute of Infectious Diseases                                                             | Tsuyoshi Sekizuka, Kentaro Itokawa, Rina Tanaka, Masanori Hashino, Makoto Kuroda                                                                                                                                                                                                                                                                                                                          |
| EPI_ISL_693213                                                                                                                                                                                                                                                                                                                                                                                                                                                                                                                                                                                                                                                                                                                                                                                                                                                                                                                 | Hospital E Maternidade Municipal Governador Mario Covas                                                                                                | Instituto Adolfo Lutz, Interdisciplinary Procedures Center, Strategic Laboratory                                                | Claudio Tavares Sacchi, Claudia Regina Gonçalves, Erica Valessa Ramos Gomes, Karoline Rodrigues Campos                                                                                                                                                                                                                                                                                                    |
| EPI_ISL_693218                                                                                                                                                                                                                                                                                                                                                                                                                                                                                                                                                                                                                                                                                                                                                                                                                                                                                                                 | Hospital Domingos Leonardo Ceravolo Presidente Prudente                                                                                                | Instituto Adolfo Lutz, Interdisciplinary Procedures Center, Strategic Laboratory                                                | Claudio Tavares Sacchi, Claudia Regina Gonçalves, Erica Valessa Ramos Gomes, Karoline Rodrigues Campos                                                                                                                                                                                                                                                                                                    |
| EPI_ISL_693219                                                                                                                                                                                                                                                                                                                                                                                                                                                                                                                                                                                                                                                                                                                                                                                                                                                                                                                 | Santa Casa da Misericórdia de Presidente Prudente                                                                                                      | Instituto Adolfo Lutz, Interdisciplinary Procedures Center, Strategic Laboratory                                                | Claudio Tavares Sacchi, Claudia Regina Gonçalves, Erica Valessa Ramos Gomes, Karoline Rodrigues Campos                                                                                                                                                                                                                                                                                                    |
| EPI_ISL_693222                                                                                                                                                                                                                                                                                                                                                                                                                                                                                                                                                                                                                                                                                                                                                                                                                                                                                                                 | Secretaria Municipal de Saúde de Birigui                                                                                                               | Instituto Adolfo Lutz, Interdisciplinary Procedures Center, Strategic Laboratory                                                | Claudio Tavares Sacchi, Claudia Regina Gonçalves, Erica Valessa Ramos Gomes, Karoline Rodrigues Campos                                                                                                                                                                                                                                                                                                    |
| EPI_ISL_693227                                                                                                                                                                                                                                                                                                                                                                                                                                                                                                                                                                                                                                                                                                                                                                                                                                                                                                                 | UBS Vila Marchi                                                                                                                                        | Instituto Adolfo Lutz, Interdisciplinary Procedures Center, Strategic Laboratory                                                | Claudio Tavares Sacchi, Claudia Regina Gonçalves, Erica Valessa Ramos Gomes, Karoline Rodrigues Campos                                                                                                                                                                                                                                                                                                    |
| EPI_ISL_693246                                                                                                                                                                                                                                                                                                                                                                                                                                                                                                                                                                                                                                                                                                                                                                                                                                                                                                                 | Laboratorio Municipal de Rio Grande da Serra                                                                                                           | Instituto Adolfo Lutz, Interdisciplinary Procedures Center, Strategic Laboratory                                                | Claudio Tavares Sacchi, Claudia Regina Gonçalves, Erica Valessa Ramos Gomes, Karoline Rodrigues Campos                                                                                                                                                                                                                                                                                                    |
| EPI_ISL_693247                                                                                                                                                                                                                                                                                                                                                                                                                                                                                                                                                                                                                                                                                                                                                                                                                                                                                                                 | Secao Centro de Diagnostico Secedi                                                                                                                     | Instituto Adolfo Lutz, Interdisciplinary Procedures Center, Strategic Laboratory                                                | Claudio Tavares Sacchi, Claudia Regina Gonçalves, Erica Valessa Ramos Gomes, Karoline Rodrigues Campos                                                                                                                                                                                                                                                                                                    |
| EPI_ISL_693248                                                                                                                                                                                                                                                                                                                                                                                                                                                                                                                                                                                                                                                                                                                                                                                                                                                                                                                 | Centro Municipal de Epidemiologia e Imunizações                                                                                                        | Instituto Adolfo Lutz, Interdisciplinary Procedures Center, Strategic Laboratory                                                | Claudio Tavares Sacchi, Claudia Regina Gonçalves, Erica Valessa Ramos Gomes, Karoline Rodrigues Campos                                                                                                                                                                                                                                                                                                    |



|                                                                                                                                                                                                                                                                                                                                                                                                                                                                                                                                                                                                                                                                                                                                                                                                                                                                                                                                                                                                                                                                                                                                                                                                                                                                                                                                                                                                                                                                                                                                                |                                                                                                                  |                                                                                                  |                                                                                                                                                                                                                                                                                                  |
|------------------------------------------------------------------------------------------------------------------------------------------------------------------------------------------------------------------------------------------------------------------------------------------------------------------------------------------------------------------------------------------------------------------------------------------------------------------------------------------------------------------------------------------------------------------------------------------------------------------------------------------------------------------------------------------------------------------------------------------------------------------------------------------------------------------------------------------------------------------------------------------------------------------------------------------------------------------------------------------------------------------------------------------------------------------------------------------------------------------------------------------------------------------------------------------------------------------------------------------------------------------------------------------------------------------------------------------------------------------------------------------------------------------------------------------------------------------------------------------------------------------------------------------------|------------------------------------------------------------------------------------------------------------------|--------------------------------------------------------------------------------------------------|--------------------------------------------------------------------------------------------------------------------------------------------------------------------------------------------------------------------------------------------------------------------------------------------------|
| EPI_ISL_695215, EPI_ISL_695362, EPI_ISL_695611                                                                                                                                                                                                                                                                                                                                                                                                                                                                                                                                                                                                                                                                                                                                                                                                                                                                                                                                                                                                                                                                                                                                                                                                                                                                                                                                                                                                                                                                                                 | AZ SPHL, Arizona Department of Health Services                                                                   | TGen North                                                                                       | Jolene Bowers, Megan Folkerts, Chris French, Hayley Yaglom, Ashlyn Pfeiffer, Darrin Lemmer, Dave Engelthaler, The Arizona COVID Genomics Union (ACGU)                                                                                                                                            |
| EPI_ISL_696285, EPI_ISL_696387                                                                                                                                                                                                                                                                                                                                                                                                                                                                                                                                                                                                                                                                                                                                                                                                                                                                                                                                                                                                                                                                                                                                                                                                                                                                                                                                                                                                                                                                                                                 | Sonora Quest Laboratories, Laboratory Sciences of Arizona                                                        | TGen North                                                                                       | Jolene Bowers, Megan Folkerts, Chris French, Hayley Yaglom, Ashlyn Pfeiffer, Darrin Lemmer, Dave Engelthaler, The Arizona COVID Genomics Union (ACGU)                                                                                                                                            |
| EPI_ISL_708529                                                                                                                                                                                                                                                                                                                                                                                                                                                                                                                                                                                                                                                                                                                                                                                                                                                                                                                                                                                                                                                                                                                                                                                                                                                                                                                                                                                                                                                                                                                                 | Secretária Municipal de Saude de Fernandópolis                                                                   | Instituto Adolfo Lutz, Interdisciplinary Procedures Center, Strategic Laboratory                 | Claudio Tavares Sacchi, Claudia Regina Gonçalves, Erica Valessa Ramos Gomes, Carlos Henrique Camargo, Karoline Rodrigues Campos, Fernanda Modesto Tolentino Binhardi, Maricelia Navarro Pinheiro Flores, Marcia Maria Costa Nunes Soares, Janaína Other Martins Montanha                         |
| EPI_ISL_717788, EPI_ISL_717789, EPI_ISL_717790                                                                                                                                                                                                                                                                                                                                                                                                                                                                                                                                                                                                                                                                                                                                                                                                                                                                                                                                                                                                                                                                                                                                                                                                                                                                                                                                                                                                                                                                                                 | LACEN RJ - Noel Nutels                                                                                           | Bioinformatics Laboratory / LNCC                                                                 | Carolina M Voloch, Ronaldo da Silva F Jr, Luiz G P de Almeida, Cynthia C Cardoso, Otavio Bustrolini, Alexandra L Gerber, Ana Paula de C Guimarães, Diana Mariani, Andréa Cony Cavalcanti, Claudia dos Santos Rodrigues, Terezinha M P P Castilheira, Amílcar Tanuri, Ana Tereza R de Vasconcelos |
| EPI_ISL_717791, EPI_ISL_717793                                                                                                                                                                                                                                                                                                                                                                                                                                                                                                                                                                                                                                                                                                                                                                                                                                                                                                                                                                                                                                                                                                                                                                                                                                                                                                                                                                                                                                                                                                                 | Laboratório de Virologia Molecular / UFRJ                                                                        | Bioinformatics Laboratory / LNCC                                                                 | Carolina M Voloch, Ronaldo da Silva F Jr, Luiz G P de Almeida, Cynthia C Cardoso, Otavio Bustrolini, Alexandra L Gerber, Ana Paula de C Guimarães, Diana Mariani, Andréa Cony Cavalcanti, Claudia dos Santos Rodrigues, Terezinha M P P Castilheira, Amílcar Tanuri, Ana Tereza R de Vasconcelos |
| EPI_ISL_717796, EPI_ISL_717797, EPI_ISL_717803                                                                                                                                                                                                                                                                                                                                                                                                                                                                                                                                                                                                                                                                                                                                                                                                                                                                                                                                                                                                                                                                                                                                                                                                                                                                                                                                                                                                                                                                                                 | LACEN RJ - Noel Nutels                                                                                           | Bioinformatics Laboratory / LNCC                                                                 | Carolina M Voloch, Ronaldo da Silva F Jr, Luiz G P de Almeida, Cynthia C Cardoso, Otavio Bustrolini, Alexandra L Gerber, Ana Paula de C Guimarães, Diana Mariani, Andréa Cony Cavalcanti, Claudia dos Santos Rodrigues, Terezinha M P P Castilheira, Amílcar Tanuri, Ana Tereza R de Vasconcelos |
| EPI_ISL_717832, EPI_ISL_717833, EPI_ISL_717834, EPI_ISL_717835, EPI_ISL_717836                                                                                                                                                                                                                                                                                                                                                                                                                                                                                                                                                                                                                                                                                                                                                                                                                                                                                                                                                                                                                                                                                                                                                                                                                                                                                                                                                                                                                                                                 | LACEN Dr. Francisco Rimolo Neto                                                                                  | Bioinformatics Laboratory / LNCC                                                                 | Carolina M Voloch, Ronaldo da Silva F Jr, Luiz G P de Almeida, Cynthia C Cardoso, Otavio Bustrolini, Alexandra L Gerber, Ana Paula de C Guimarães, Diana Mariani, Andréa Cony Cavalcanti, Claudia dos Santos Rodrigues, Terezinha M P P Castilheira, Amílcar Tanuri, Ana Tereza R de Vasconcelos |
| EPI_ISL_717837, EPI_ISL_717838, EPI_ISL_717839, EPI_ISL_717840, EPI_ISL_717842, EPI_ISL_717843, EPI_ISL_717844, EPI_ISL_717845, EPI_ISL_717846, EPI_ISL_717847, EPI_ISL_717848, EPI_ISL_717849, EPI_ISL_717850, EPI_ISL_717851, EPI_ISL_717852, EPI_ISL_717853, EPI_ISL_717854, EPI_ISL_717855, EPI_ISL_717856, EPI_ISL_717857, EPI_ISL_717858, EPI_ISL_717859, EPI_ISL_717860, EPI_ISL_717862, EPI_ISL_717864, EPI_ISL_717865, EPI_ISL_717866, EPI_ISL_717867, EPI_ISL_717868, EPI_ISL_717869, EPI_ISL_717870, EPI_ISL_717871, EPI_ISL_717872, EPI_ISL_717873, EPI_ISL_717874, EPI_ISL_717875, EPI_ISL_717876, EPI_ISL_717877, EPI_ISL_717878, EPI_ISL_717880, EPI_ISL_717881, EPI_ISL_717882, EPI_ISL_717883, EPI_ISL_717884, EPI_ISL_717885, EPI_ISL_717886, EPI_ISL_717887, EPI_ISL_717888, EPI_ISL_717889, EPI_ISL_717890, EPI_ISL_717891, EPI_ISL_717892, EPI_ISL_717893, EPI_ISL_717894, EPI_ISL_717896, EPI_ISL_717897, EPI_ISL_717898                                                                                                                                                                                                                                                                                                                                                                                                                                                                                                                                                                                                 | Laboratório de Virologia Molecular / UFRJ                                                                        | Bioinformatics Laboratory / LNCC                                                                 | Carolina M Voloch, Ronaldo da Silva F Jr, Luiz G P de Almeida, Cynthia C Cardoso, Otavio Bustrolini, Alexandra L Gerber, Ana Paula de C Guimarães, Diana Mariani, Andréa Cony Cavalcanti, Claudia dos Santos Rodrigues, Terezinha M P P Castilheira, Amílcar Tanuri, Ana Tereza R de Vasconcelos |
| EPI_ISL_717899, EPI_ISL_717900, EPI_ISL_717901, EPI_ISL_717902, EPI_ISL_717903, EPI_ISL_717904, EPI_ISL_717905, EPI_ISL_717906, EPI_ISL_717907, EPI_ISL_717908, EPI_ISL_717909                                                                                                                                                                                                                                                                                                                                                                                                                                                                                                                                                                                                                                                                                                                                                                                                                                                                                                                                                                                                                                                                                                                                                                                                                                                                                                                                                                 | LACEN RJ - Noel Nutels                                                                                           | Bioinformatics Laboratory / LNCC                                                                 | Carolina M Voloch, Ronaldo da Silva F Jr, Luiz G P de Almeida, Cynthia C Cardoso, Otavio Bustrolini, Alexandra L Gerber, Ana Paula de C Guimarães, Diana Mariani, Andréa Cony Cavalcanti, Claudia dos Santos Rodrigues, Terezinha M P P Castilheira, Amílcar Tanuri, Ana Tereza R de Vasconcelos |
| EPI_ISL_717910, EPI_ISL_717911, EPI_ISL_717912, EPI_ISL_717913, EPI_ISL_717914, EPI_ISL_717915, EPI_ISL_717916, EPI_ISL_717917, EPI_ISL_717918, EPI_ISL_717919                                                                                                                                                                                                                                                                                                                                                                                                                                                                                                                                                                                                                                                                                                                                                                                                                                                                                                                                                                                                                                                                                                                                                                                                                                                                                                                                                                                 | LACEN Dr. Francisco Rimolo Neto                                                                                  | Bioinformatics Laboratory / LNCC                                                                 | Carolina M Voloch, Ronaldo da Silva F Jr, Luiz G P de Almeida, Cynthia C Cardoso, Otavio Bustrolini, Alexandra L Gerber, Ana Paula de C Guimarães, Diana Mariani, Andréa Cony Cavalcanti, Claudia dos Santos Rodrigues, Terezinha M P P Castilheira, Amílcar Tanuri, Ana Tereza R de Vasconcelos |
| EPI_ISL_717959, EPI_ISL_717961                                                                                                                                                                                                                                                                                                                                                                                                                                                                                                                                                                                                                                                                                                                                                                                                                                                                                                                                                                                                                                                                                                                                                                                                                                                                                                                                                                                                                                                                                                                 | Laboratório de Virologia Molecular / UFRJ                                                                        | Bioinformatics Laboratory / LNCC                                                                 | Carolina M Voloch, Ronaldo da Silva F Jr, Luiz G P de Almeida, Cynthia C Cardoso, Otavio Bustrolini, Alexandra L Gerber, Ana Paula de C Guimarães, Diana Mariani, Andréa Cony Cavalcanti, Claudia dos Santos Rodrigues, Terezinha M P P Castilheira, Amílcar Tanuri, Ana Tereza R de Vasconcelos |
| EPI_ISL_717962                                                                                                                                                                                                                                                                                                                                                                                                                                                                                                                                                                                                                                                                                                                                                                                                                                                                                                                                                                                                                                                                                                                                                                                                                                                                                                                                                                                                                                                                                                                                 | LACEN RJ - Noel Nutels                                                                                           | Bioinformatics Laboratory / LNCC                                                                 | Carolina M Voloch, Ronaldo da Silva F Jr, Luiz G P de Almeida, Cynthia C Cardoso, Otavio Bustrolini, Alexandra L Gerber, Ana Paula de C Guimarães, Diana Mariani, Andréa Cony Cavalcanti, Claudia dos Santos Rodrigues, Terezinha M P P Castilheira, Amílcar Tanuri, Ana Tereza R de Vasconcelos |
| EPI_ISL_717963, EPI_ISL_717964                                                                                                                                                                                                                                                                                                                                                                                                                                                                                                                                                                                                                                                                                                                                                                                                                                                                                                                                                                                                                                                                                                                                                                                                                                                                                                                                                                                                                                                                                                                 | LACEN Dr. Francisco Rimolo Neto                                                                                  | Bioinformatics Laboratory / LNCC                                                                 | Carolina M Voloch, Ronaldo da Silva F Jr, Luiz G P de Almeida, Cynthia C Cardoso, Otavio Bustrolini, Alexandra L Gerber, Ana Paula de C Guimarães, Diana Mariani, Andréa Cony Cavalcanti, Claudia dos Santos Rodrigues, Terezinha M P P Castilheira, Amílcar Tanuri, Ana Tereza R de Vasconcelos |
| EPI_ISL_721991, EPI_ISL_721992, EPI_ISL_721997, EPI_ISL_721998, EPI_ISL_722000, EPI_ISL_722001, EPI_ISL_722008, EPI_ISL_722021, EPI_ISL_722028, EPI_ISL_722030, EPI_ISL_722081, EPI_ISL_722090, EPI_ISL_722096, EPI_ISL_722103, EPI_ISL_722106, EPI_ISL_722112, EPI_ISL_722115, EPI_ISL_722120, EPI_ISL_722126, EPI_ISL_722129                                                                                                                                                                                                                                                                                                                                                                                                                                                                                                                                                                                                                                                                                                                                                                                                                                                                                                                                                                                                                                                                                                                                                                                                                 | Hospital das Clínicas Universidade de São Paulo Medical School                                                   | Laboratório de Parasitologia Médica - Instituto de Medicina Tropical - Universidade de São Paulo | Brazil-UK Centre for Arbovirus Discovery Diagnosis Genomics and Epidemiology (CADDE) Genomic Network - Instituto de Medicina Tropical                                                                                                                                                            |
| EPI_ISL_722130                                                                                                                                                                                                                                                                                                                                                                                                                                                                                                                                                                                                                                                                                                                                                                                                                                                                                                                                                                                                                                                                                                                                                                                                                                                                                                                                                                                                                                                                                                                                 | Instituto de Medicina Tropical Universidade de São Paulo                                                         | Laboratório de Parasitologia Médica - Instituto de Medicina Tropical - Universidade de São Paulo | Brazil-UK Centre for Arbovirus Discovery Diagnosis Genomics and Epidemiology (CADDE) Genomic Network - Instituto de Medicina Tropical                                                                                                                                                            |
| EPI_ISL_722136, EPI_ISL_722137, EPI_ISL_722138, EPI_ISL_722139, EPI_ISL_722140, EPI_ISL_722143, EPI_ISL_722144, EPI_ISL_722146, EPI_ISL_722147, EPI_ISL_722149, EPI_ISL_722150, EPI_ISL_722152, EPI_ISL_722153, EPI_ISL_722155, EPI_ISL_722156, EPI_ISL_722158, EPI_ISL_722160, EPI_ISL_722167, EPI_ISL_722168, EPI_ISL_722169                                                                                                                                                                                                                                                                                                                                                                                                                                                                                                                                                                                                                                                                                                                                                                                                                                                                                                                                                                                                                                                                                                                                                                                                                 | DB Diagnosticos do Brasil                                                                                        | Laboratório de Parasitologia Médica - Instituto de Medicina Tropical - Universidade de São Paulo | Brazil-UK Centre for Arbovirus Discovery Diagnosis Genomics and Epidemiology (CADDE) Genomic Network - Instituto de Medicina Tropical                                                                                                                                                            |
| EPI_ISL_722899                                                                                                                                                                                                                                                                                                                                                                                                                                                                                                                                                                                                                                                                                                                                                                                                                                                                                                                                                                                                                                                                                                                                                                                                                                                                                                                                                                                                                                                                                                                                 | Dipartimento di Scienze Biomediche e Oncologia Umana - Azienda Ospedaliera Universitaria Consorziale Policlinico | Istituto Zooprofilattico Sperimentale della Puglia e della Basilicata                            | Parisi A., Bianco A., Capozzi L., Del Sambro L., Chironna M., Loconsole D.                                                                                                                                                                                                                       |
| EPI_ISL_729794, EPI_ISL_729795, EPI_ISL_729796, EPI_ISL_729797, EPI_ISL_729798, EPI_ISL_729800, EPI_ISL_729802, EPI_ISL_729807, EPI_ISL_729809, EPI_ISL_729810, EPI_ISL_729812, EPI_ISL_729814, EPI_ISL_729816, EPI_ISL_729817, EPI_ISL_729818, EPI_ISL_729819, EPI_ISL_729820, EPI_ISL_729821, EPI_ISL_729823, EPI_ISL_729824, EPI_ISL_729825, EPI_ISL_729826, EPI_ISL_729827, EPI_ISL_729828, EPI_ISL_729829, EPI_ISL_729830, EPI_ISL_729831, EPI_ISL_729832, EPI_ISL_729833, EPI_ISL_729837, EPI_ISL_729838, EPI_ISL_729839, EPI_ISL_729841, EPI_ISL_729842, EPI_ISL_729843, EPI_ISL_729844, EPI_ISL_729849, EPI_ISL_729851, EPI_ISL_729857, EPI_ISL_729858, EPI_ISL_729860                                                                                                                                                                                                                                                                                                                                                                                                                                                                                                                                                                                                                                                                                                                                                                                                                                                                 | Laboratorio Central de Saude Publica do Estado do Rio Grande do Sul (LACEN-RS)                                   | Laboratory of Respiratory Viruses and Measles, Oswaldo Cruz Institute, FIOCRUZ                   | Paola Resende, Luciana Appolinario, Fernando Motta, Anna Carolina Paixão, Ana Carolina Mendonça, Tatiana Schaffer Gregianini, Marilda Tereza Mar da Rosa, Marilda Siqueira                                                                                                                       |
| EPI_ISL_735407                                                                                                                                                                                                                                                                                                                                                                                                                                                                                                                                                                                                                                                                                                                                                                                                                                                                                                                                                                                                                                                                                                                                                                                                                                                                                                                                                                                                                                                                                                                                 | Santa Casa de Marília                                                                                            | Instituto Adolfo Lutz, Interdisciplinary Procedures Center, Strategic Laboratory                 | Claudio Tavares Sacchi, Claudia Regina Gonçalves, Erica Valessa Ramos Gomes, Karoline Rodrigues Campos                                                                                                                                                                                           |
| EPI_ISL_735410                                                                                                                                                                                                                                                                                                                                                                                                                                                                                                                                                                                                                                                                                                                                                                                                                                                                                                                                                                                                                                                                                                                                                                                                                                                                                                                                                                                                                                                                                                                                 | Instituto Adolfo Lutz - Regional de Rio Claro                                                                    | Instituto Adolfo Lutz, Interdisciplinary Procedures Center, Strategic Laboratory                 | Claudio Tavares Sacchi, Claudia Regina Gonçalves, Erica Valessa Ramos Gomes, Karoline Rodrigues Campos                                                                                                                                                                                           |
| EPI_ISL_735414, EPI_ISL_735415                                                                                                                                                                                                                                                                                                                                                                                                                                                                                                                                                                                                                                                                                                                                                                                                                                                                                                                                                                                                                                                                                                                                                                                                                                                                                                                                                                                                                                                                                                                 | Unidade de Pronto Atendimento de Agenor de Campos                                                                | Instituto Adolfo Lutz, Interdisciplinary Procedures Center, Strategic Laboratory                 | Claudio Tavares Sacchi, Claudia Regina Gonçalves, Erica Valessa Ramos Gomes, Karoline Rodrigues Campos                                                                                                                                                                                           |
| EPI_ISL_735416                                                                                                                                                                                                                                                                                                                                                                                                                                                                                                                                                                                                                                                                                                                                                                                                                                                                                                                                                                                                                                                                                                                                                                                                                                                                                                                                                                                                                                                                                                                                 | Centro de Saude II Dr Jose Paione Mococa                                                                         | Instituto Adolfo Lutz, Interdisciplinary Procedures Center, Strategic Laboratory                 | Claudio Tavares Sacchi, Claudia Regina Gonçalves, Erica Valessa Ramos Gomes, Karoline Rodrigues Campos                                                                                                                                                                                           |
| EPI_ISL_735425                                                                                                                                                                                                                                                                                                                                                                                                                                                                                                                                                                                                                                                                                                                                                                                                                                                                                                                                                                                                                                                                                                                                                                                                                                                                                                                                                                                                                                                                                                                                 | Hospital e Maternidade Sao Lucas                                                                                 | Instituto Adolfo Lutz, Interdisciplinary Procedures Center, Strategic Laboratory                 | Claudio Tavares Sacchi, Claudia Regina Gonçalves, Erica Valessa Ramos Gomes, Karoline Rodrigues Campos                                                                                                                                                                                           |
| EPI_ISL_735427, EPI_ISL_735430                                                                                                                                                                                                                                                                                                                                                                                                                                                                                                                                                                                                                                                                                                                                                                                                                                                                                                                                                                                                                                                                                                                                                                                                                                                                                                                                                                                                                                                                                                                 | Instituto Adolfo Lutz - Regional de Santos                                                                       | Instituto Adolfo Lutz, Interdisciplinary Procedures Center, Strategic Laboratory                 | Claudio Tavares Sacchi, Claudia Regina Gonçalves, Erica Valessa Ramos Gomes, Karoline Rodrigues Campos                                                                                                                                                                                           |
| EPI_ISL_736919                                                                                                                                                                                                                                                                                                                                                                                                                                                                                                                                                                                                                                                                                                                                                                                                                                                                                                                                                                                                                                                                                                                                                                                                                                                                                                                                                                                                                                                                                                                                 | Pathogen Genomics Center, National Institute of Infectious Diseases                                              | Pathogen Genomics Center, National Institute of Infectious Diseases                              | Tsuyoshi Sekizuka, Kentaro Itokawa, Rina Tanaka, Masanori Hashino, Makoto Kuroda                                                                                                                                                                                                                 |
| EPI_ISL_740601, EPI_ISL_740784                                                                                                                                                                                                                                                                                                                                                                                                                                                                                                                                                                                                                                                                                                                                                                                                                                                                                                                                                                                                                                                                                                                                                                                                                                                                                                                                                                                                                                                                                                                 | BCCDC Public Health Laboratory                                                                                   | BCCDC Public Health Laboratory                                                                   | Prystajecy Natalie, Linda Hoang, Dan Fornika, Shannon Russell, Kim Macdonald, Kimia Kamelian, John Tyson, Inna Sekirov, Mel Krajden                                                                                                                                                              |
| EPI_ISL_746479, EPI_ISL_746481, EPI_ISL_746482, EPI_ISL_746484, EPI_ISL_746489, EPI_ISL_746492, EPI_ISL_746498, EPI_ISL_746499, EPI_ISL_746500, EPI_ISL_746501, EPI_ISL_746503, EPI_ISL_746506, EPI_ISL_746508, EPI_ISL_746509, EPI_ISL_746511, EPI_ISL_746512, EPI_ISL_746513, EPI_ISL_746516, EPI_ISL_746530, EPI_ISL_746532, EPI_ISL_746537, EPI_ISL_746542, EPI_ISL_746554, EPI_ISL_746557, EPI_ISL_746563, EPI_ISL_746565, EPI_ISL_746570, EPI_ISL_746573, EPI_ISL_746574, EPI_ISL_746579, EPI_ISL_746581, EPI_ISL_746592, EPI_ISL_746597, EPI_ISL_746600, EPI_ISL_746602, EPI_ISL_746605, EPI_ISL_746607, EPI_ISL_746609, EPI_ISL_746615, EPI_ISL_746619, EPI_ISL_746622, EPI_ISL_746625, EPI_ISL_746629, EPI_ISL_746635, EPI_ISL_746636, EPI_ISL_746642, EPI_ISL_746644, EPI_ISL_746645, EPI_ISL_746647, EPI_ISL_746652, EPI_ISL_746655, EPI_ISL_746657, EPI_ISL_746659, EPI_ISL_746662, EPI_ISL_746665, EPI_ISL_746666, EPI_ISL_746672, EPI_ISL_746673, EPI_ISL_746675, EPI_ISL_746676, EPI_ISL_746677, EPI_ISL_746678, EPI_ISL_746685, EPI_ISL_746689, EPI_ISL_746693, EPI_ISL_746694, EPI_ISL_746696, EPI_ISL_746704, EPI_ISL_746707, EPI_ISL_746730, EPI_ISL_746734, EPI_ISL_746736, EPI_ISL_746750, EPI_ISL_746753, EPI_ISL_746754, EPI_ISL_746772, EPI_ISL_746780, EPI_ISL_746782, EPI_ISL_746785, EPI_ISL_746787, EPI_ISL_746789, EPI_ISL_746790, EPI_ISL_746792, EPI_ISL_746793, EPI_ISL_746798, EPI_ISL_746801, EPI_ISL_746806, EPI_ISL_746807, EPI_ISL_746815, EPI_ISL_746817, EPI_ISL_746820, EPI_ISL_746821, EPI_ISL_746825 |                                                                                                                  |                                                                                                  |                                                                                                                                                                                                                                                                                                  |

|                                                                                                                                                                                                                                                                                |                                                                  |                                                                                     |                                                                                                                                                                                                                                                                                                                                                                                                                                                                                                                                                                                                                                                     |
|--------------------------------------------------------------------------------------------------------------------------------------------------------------------------------------------------------------------------------------------------------------------------------|------------------------------------------------------------------|-------------------------------------------------------------------------------------|-----------------------------------------------------------------------------------------------------------------------------------------------------------------------------------------------------------------------------------------------------------------------------------------------------------------------------------------------------------------------------------------------------------------------------------------------------------------------------------------------------------------------------------------------------------------------------------------------------------------------------------------------------|
| see above                                                                                                                                                                                                                                                                      | Genetica Molecular and Subdepartamento de Virologia<br>ISP Chile | Instituto de Salud Publica de Chile                                                 | Javier Tognarelli, Barbara Parra, Loredana Arata, Jaime Lagos, Gisselle Barra, Patricia Bustos, Rodrigo Fasce, Andres Castillo, Jorge Fernandez                                                                                                                                                                                                                                                                                                                                                                                                                                                                                                     |
| EPI_ISL_747615, EPI_ISL_748138, EPI_ISL_748139,<br>EPI_ISL_748140, EPI_ISL_748141, EPI_ISL_748142,<br>EPI_ISL_748143, EPI_ISL_748144, EPI_ISL_748145                                                                                                                           | Instituto de Investigaciones Biologicas Clemente Estable         | Institut Pasteur de Montevideo                                                      | Daiana Mir, Natalia Rego, Paola Cristina Resende, Fernando Lopez-Tort, Tamara Fernandez-Calero, Veronica Noya, Mariana Brandes, Tania Possi, Mailen Arleo, Natalia Reyes, Matias Victoria, Andres Lizasoain, Matias Castells, Leticia Maya, Matias Salvo, Tatiana Schäffer Gregianini, Marilda Tereza Mar da Rosa, Leticia Garay Martins, Cecilia Alonso, Yasser Vega, Cecilia Salazar, Ignacio Ferrés, Pablo Smircich, Jose Sotelo, Ighor Arantes, Luciana Appolinario, Ana Carolina Mendonça, Maria Jose Benitez-Galeano, Martin Graña, Camila Simoes, Fernando Motta, Marilda Mendonça Siqueira, Gonzalo Bello, Rodney Colina, Lucia Spangenberg |
| EPI_ISL_748667, EPI_ISL_749036, EPI_ISL_749148, EPI_ISL_749149, EPI_ISL_749150, EPI_ISL_749151, EPI_ISL_749152, EPI_ISL_749153, EPI_ISL_749154, EPI_ISL_749155, EPI_ISL_749238, EPI_ISL_749474, EPI_ISL_749706, EPI_ISL_749906, EPI_ISL_750108, EPI_ISL_750161, EPI_ISL_750162 | Sanatorio Americano                                              | Institut Pasteur de Montevideo                                                      | Daiana Mir, Natalia Rego, Paola Cristina Resende, Fernando Lopez-Tort, Tamara Fernandez-Calero, Veronica Noya, Mariana Brandes, Tania Possi, Mailen Arleo, Natalia Reyes, Matias Victoria, Andres Lizasoain, Matias Castells, Leticia Maya, Matias Salvo, Tatiana Schäffer Gregianini, Marilda Tereza Mar da Rosa, Leticia Garay Martins, Cecilia Alonso, Yasser Vega, Cecilia Salazar, Ignacio Ferrés, Pablo Smircich, Jose Sotelo, Ighor Arantes, Luciana Appolinario, Ana Carolina Mendonça, Maria Jose Benitez-Galeano, Martin Graña, Camila Simoes, Fernando Motta, Marilda Mendonça Siqueira, Gonzalo Bello, Rodney Colina, Lucia Spangenberg |
| EPI_ISL_750163, EPI_ISL_750164                                                                                                                                                                                                                                                 | Laboratorio DILAVE/MGAP-INIA-UdelaR -Tacuarembó                  | Institut Pasteur de Montevideo                                                      | Daiana Mir, Natalia Rego, Paola Cristina Resende, Fernando Lopez-Tort, Tamara Fernandez-Calero, Veronica Noya, Mariana Brandes, Tania Possi, Mailen Arleo, Natalia Reyes, Matias Victoria, Andres Lizasoain, Matias Castells, Leticia Maya, Matias Salvo, Tatiana Schäffer Gregianini, Marilda Tereza Mar da Rosa, Leticia Garay Martins, Cecilia Alonso, Yasser Vega, Cecilia Salazar, Ignacio Ferrés, Pablo Smircich, Jose Sotelo, Ighor Arantes, Luciana Appolinario, Ana Carolina Mendonça, Maria Jose Benitez-Galeano, Martin Graña, Camila Simoes, Fernando Motta, Marilda Mendonça Siqueira, Gonzalo Bello, Rodney Colina, Lucia Spangenberg |
| EPI_ISL_750165                                                                                                                                                                                                                                                                 | CENUR Litoral Norte - UdelaR, Salto, Uruguay.                    | Institut Pasteur de Montevideo                                                      | Daiana Mir, Natalia Rego, Paola Cristina Resende, Fernando Lopez-Tort, Tamara Fernandez-Calero, Veronica Noya, Mariana Brandes, Tania Possi, Mailen Arleo, Natalia Reyes, Matias Victoria, Andres Lizasoain, Matias Castells, Leticia Maya, Matias Salvo, Tatiana Schäffer Gregianini, Marilda Tereza Mar da Rosa, Leticia Garay Martins, Cecilia Alonso, Yasser Vega, Cecilia Salazar, Ignacio Ferrés, Pablo Smircich, Jose Sotelo, Ighor Arantes, Luciana Appolinario, Ana Carolina Mendonça, Maria Jose Benitez-Galeano, Martin Graña, Camila Simoes, Fernando Motta, Marilda Mendonça Siqueira, Gonzalo Bello, Rodney Colina, Lucia Spangenberg |
| EPI_ISL_750166, EPI_ISL_750168, EPI_ISL_750169, EPI_ISL_750170, EPI_ISL_750171, EPI_ISL_750172, EPI_ISL_750173, EPI_ISL_750174, EPI_ISL_750178, EPI_ISL_750179, EPI_ISL_750256, EPI_ISL_750430, EPI_ISL_750820, EPI_ISL_751011                                                 | Sanatorio Americano                                              | Institut Pasteur de Montevideo                                                      | Daiana Mir, Natalia Rego, Paola Cristina Resende, Fernando Lopez-Tort, Tamara Fernandez-Calero, Veronica Noya, Mariana Brandes, Tania Possi, Mailen Arleo, Natalia Reyes, Matias Victoria, Andres Lizasoain, Matias Castells, Leticia Maya, Matias Salvo, Tatiana Schäffer Gregianini, Marilda Tereza Mar da Rosa, Leticia Garay Martins, Cecilia Alonso, Yasser Vega, Cecilia Salazar, Ignacio Ferrés, Pablo Smircich, Jose Sotelo, Ighor Arantes, Luciana Appolinario, Ana Carolina Mendonça, Maria Jose Benitez-Galeano, Martin Graña, Camila Simoes, Fernando Motta, Marilda Mendonça Siqueira, Gonzalo Bello, Rodney Colina, Lucia Spangenberg |
| EPI_ISL_751187, EPI_ISL_751188                                                                                                                                                                                                                                                 | CENUR Litoral Norte - UdelaR, Salto, Uruguay                     | Institut Pasteur de Montevideo                                                      | Daiana Mir, Natalia Rego, Paola Cristina Resende, Fernando Lopez-Tort, Tamara Fernandez-Calero, Veronica Noya, Mariana Brandes, Tania Possi, Mailen Arleo, Natalia Reyes, Matias Victoria, Andres Lizasoain, Matias Castells, Leticia Maya, Matias Salvo, Tatiana Schäffer Gregianini, Marilda Tereza Mar da Rosa, Leticia Garay Martins, Cecilia Alonso, Yasser Vega, Cecilia Salazar, Ignacio Ferrés, Pablo Smircich, Jose Sotelo, Ighor Arantes, Luciana Appolinario, Ana Carolina Mendonça, Maria Jose Benitez-Galeano, Martin Graña, Camila Simoes, Fernando Motta, Marilda Mendonça Siqueira, Gonzalo Bello, Rodney Colina, Lucia Spangenberg |
| EPI_ISL_754411                                                                                                                                                                                                                                                                 | Wadsworth Center, New York State Department.of<br>Health         | Wadsworth Center, New York State Department.of<br>Health                            | Kirsten St. George, Daryl M. Lamson, Alexis Russel, Matthew Shudt, Melissa A Leisner, Jonathan Pliitnick, Navjot Singh, John Kelly, Sara Griesemer, Erasmus Schneider, Erica Lasek-Nesselquist                                                                                                                                                                                                                                                                                                                                                                                                                                                      |
| EPI_ISL_755649                                                                                                                                                                                                                                                                 | Instituto Adolfo Lutz - Regional de Santo Andre                  | Instituto Adolfo Lutz, Interdisciplinary Procedures Center,<br>Strategic Laboratory | Claudio Tavares Sacchi, Claudia Regina Gonçalves, Erica Valessa Ramos Gomes, Karoline Rodrigues Campos                                                                                                                                                                                                                                                                                                                                                                                                                                                                                                                                              |
| EPI_ISL_755652                                                                                                                                                                                                                                                                 | Lab LOC - Itapeperica da Serra                                   | Instituto Adolfo Lutz, Interdisciplinary Procedures Center,<br>Strategic Laboratory | Claudio Tavares Sacchi, Claudia Regina Gonçalves, Erica Valessa Ramos Gomes, Karoline Rodrigues Campos                                                                                                                                                                                                                                                                                                                                                                                                                                                                                                                                              |

We gratefully acknowledge the following Authors from the Originating laboratories responsible for obtaining the specimens, as well as the Submitting laboratories where the genome data were generated and shared via GISAID, on which this research is based.

All Submitters of data may be contacted directly via [www.gisaid.org](http://www.gisaid.org)

| Accession ID                                                                                                                                                                                                                                                                                                                                                                                                                                                                                                                                                                                                                                                                                                                                                                                                                                                                                                                                                                                                                                                                                                                                                                                                                                                                                                                                                                                                                                                                                                                                                                                                                                                                                                                                                                                                                                                                                                   | Originating Laboratory                                                                                                  | Submitting Laboratory                                                                                                   | Authors                                                                                                                                                                                                                                                                                                                                                                                                                                                                                                                                                                                                                                                                                                                                                                                     |
|----------------------------------------------------------------------------------------------------------------------------------------------------------------------------------------------------------------------------------------------------------------------------------------------------------------------------------------------------------------------------------------------------------------------------------------------------------------------------------------------------------------------------------------------------------------------------------------------------------------------------------------------------------------------------------------------------------------------------------------------------------------------------------------------------------------------------------------------------------------------------------------------------------------------------------------------------------------------------------------------------------------------------------------------------------------------------------------------------------------------------------------------------------------------------------------------------------------------------------------------------------------------------------------------------------------------------------------------------------------------------------------------------------------------------------------------------------------------------------------------------------------------------------------------------------------------------------------------------------------------------------------------------------------------------------------------------------------------------------------------------------------------------------------------------------------------------------------------------------------------------------------------------------------|-------------------------------------------------------------------------------------------------------------------------|-------------------------------------------------------------------------------------------------------------------------|---------------------------------------------------------------------------------------------------------------------------------------------------------------------------------------------------------------------------------------------------------------------------------------------------------------------------------------------------------------------------------------------------------------------------------------------------------------------------------------------------------------------------------------------------------------------------------------------------------------------------------------------------------------------------------------------------------------------------------------------------------------------------------------------|
| EPI_ISL_415131, EPI_ISL_415147                                                                                                                                                                                                                                                                                                                                                                                                                                                                                                                                                                                                                                                                                                                                                                                                                                                                                                                                                                                                                                                                                                                                                                                                                                                                                                                                                                                                                                                                                                                                                                                                                                                                                                                                                                                                                                                                                 | Respiratory Virus Unit, Microbiology Services Colindale, Public Health England                                          | Respiratory Virus Unit, Microbiology Services Colindale, Public Health England                                          | Monica Galiano, Shahjahan Miah, Angie Lackenby, Omolola Akinbami, Tiina Talts, Leena Bhaw, Richard Myers, Steven Platt, Kirstin Edwards, Jonathan Hubb, Joanna Ellis, Maria Zambon                                                                                                                                                                                                                                                                                                                                                                                                                                                                                                                                                                                                          |
| EPI_ISL_416482                                                                                                                                                                                                                                                                                                                                                                                                                                                                                                                                                                                                                                                                                                                                                                                                                                                                                                                                                                                                                                                                                                                                                                                                                                                                                                                                                                                                                                                                                                                                                                                                                                                                                                                                                                                                                                                                                                 | R. G. Lugar Center for Public Health Research, National Center for Disease Control and Public Health (NCDC) of Georgia. | R. G. Lugar Center for Public Health Research, National Center for Disease Control and Public Health (NCDC) of Georgia. | Adam Kotorashvili, Marine Murtskhvaladze, Nato Kotaria, Ann Machabishvili, Lela Sabadze, Mari Gavashelidze, Ana Papkiauri, Meri Pantsulaia, Gvantsa Brachveli, Tata Imnadze, Tamar Jashiashvili, Tea Tvedoradze, Ketevan Sidamonidze, Ekaterine Khmaladze, Ekaterine Zhghenti, Roena Sukhiashvili, Mariam Zakalashvili, Lela Urushadze, Magda Dgebuadze, Giorgi Tomashvili, Davit Tsaguria, Ekaterine Zangaladze, Nino Berishvili, Gvantsa Chanturia, Maia Alkhazashvili, Irma Burjanadze, Anna Kasradze, Khatuna Zakhshvili, Paata Imnadze, Amiran Gamkrelidze.                                                                                                                                                                                                                            |
| EPI_ISL_417233, EPI_ISL_417248, EPI_ISL_417251, EPI_ISL_417301, EPI_ISL_417302, EPI_ISL_417304                                                                                                                                                                                                                                                                                                                                                                                                                                                                                                                                                                                                                                                                                                                                                                                                                                                                                                                                                                                                                                                                                                                                                                                                                                                                                                                                                                                                                                                                                                                                                                                                                                                                                                                                                                                                                 | Respiratory Virus Unit, Microbiology Services Colindale, Public Health England                                          | Respiratory Virus Unit, Microbiology Services Colindale, Public Health England                                          | Monica Galiano, Shahjahan Miah, Angie Lackenby, Omolola Akinbami, Tiina Talts, Leena Bhaw, Richard Myers, Steven Platt, Kirstin Edwards, Jonathan Hubb, Joanna Ellis, Maria Zambon                                                                                                                                                                                                                                                                                                                                                                                                                                                                                                                                                                                                          |
| EPI_ISL_417695, EPI_ISL_417698, EPI_ISL_417736, EPI_ISL_417749                                                                                                                                                                                                                                                                                                                                                                                                                                                                                                                                                                                                                                                                                                                                                                                                                                                                                                                                                                                                                                                                                                                                                                                                                                                                                                                                                                                                                                                                                                                                                                                                                                                                                                                                                                                                                                                 | The National University Hospital of Iceland                                                                             | deCODE genetics                                                                                                         | Daniel F Gudbjartsson; Agnar Helgason; Hakon Jonsson; Olafur T Magnusson; Páll Melsted; Gudmundur L Norddahl; Jóna Saemundsdóttir; Asgeir Sigurdsson; Patrick Sulem; Arna B Agustsdóttir; Berglind Eiríksdóttir; Run Fridríksdóttir; Elísabet E Gardarsdóttir; Gudmundur Georgsson; Olafía S Gretarsdóttir; Kjartan R Gudmundsson; Thóra R Gunnarsdóttir; Arnaldur Gylfason; Hilma Holm; Brynjar O Jensson; Aslaug Jonasdóttir; Kamilla S Josefsdóttir; Thorður Kristjánsson; Droplaug N Magnúsdóttir; Louise le Roux; Gudrun Sigmundsdóttir; Gardar Sveinbjörnsson; Kristín E Sveinsdóttir; Maney Sveinsdóttir; Emil A Thorarensen; Bjarni Thorbjörnsson; Gisli Masson; Ingileif Jónsdóttir; Alma Moller; Thorólfur Guðnason; Karl G Kristinnsson; Unnur Thorsteinsdóttir; Kari Stefánsson |
| EPI_ISL_417997, EPI_ISL_417998, EPI_ISL_417999                                                                                                                                                                                                                                                                                                                                                                                                                                                                                                                                                                                                                                                                                                                                                                                                                                                                                                                                                                                                                                                                                                                                                                                                                                                                                                                                                                                                                                                                                                                                                                                                                                                                                                                                                                                                                                                                 | Centro Hospital do Porto, E.P.E. - H. Geral de Santo António                                                            | Instituto Nacional de Saude (INSA)                                                                                      | Guimar et al                                                                                                                                                                                                                                                                                                                                                                                                                                                                                                                                                                                                                                                                                                                                                                                |
| EPI_ISL_418003                                                                                                                                                                                                                                                                                                                                                                                                                                                                                                                                                                                                                                                                                                                                                                                                                                                                                                                                                                                                                                                                                                                                                                                                                                                                                                                                                                                                                                                                                                                                                                                                                                                                                                                                                                                                                                                                                                 | H Braga                                                                                                                 | Instituto Nacional de Saude (INSA)                                                                                      | Guimar et al                                                                                                                                                                                                                                                                                                                                                                                                                                                                                                                                                                                                                                                                                                                                                                                |
| EPI_ISL_420067                                                                                                                                                                                                                                                                                                                                                                                                                                                                                                                                                                                                                                                                                                                                                                                                                                                                                                                                                                                                                                                                                                                                                                                                                                                                                                                                                                                                                                                                                                                                                                                                                                                                                                                                                                                                                                                                                                 | Health Board Laboratory of Communicable Diseases                                                                        | Charite Universitätsmedizin Berlin, Institute of Virology                                                               | Victor M Corman, Jörn Beheim-Schwarzbach, Barbara Mühlemann, Talitha Veith, Julia Schneider, Lidia Dotsenko, Natalja Kuznetsova, Terry Jones, Christian Drosten                                                                                                                                                                                                                                                                                                                                                                                                                                                                                                                                                                                                                             |
| EPI_ISL_422700, EPI_ISL_422708, EPI_ISL_422916, EPI_ISL_422917, EPI_ISL_422920, EPI_ISL_422941                                                                                                                                                                                                                                                                                                                                                                                                                                                                                                                                                                                                                                                                                                                                                                                                                                                                                                                                                                                                                                                                                                                                                                                                                                                                                                                                                                                                                                                                                                                                                                                                                                                                                                                                                                                                                 | Dutch COVID-19 response team                                                                                            | Erasmus Medical Center                                                                                                  | Bas Oude Munnink, David Nieuwenhuijse, Reina Sikkema, Claudia Schapendonk, Irina Chestakova, Anne van der Linden, Theo Bestebroer, Stefan van Nieuwkoop, Mark Pronk, Pascal Lexmond, Corien Swaan, Manon Haverkate, Madelief Mollers, Mart Stein, Sandra Kenge Kanga Mobou, Jeroen van Kampen, Jolanda Voermans, Aura Timen, Corine GeurtsvanKessel, Annetiek van der Eijk, Richard Molenkamp, Marion Koopmans, on behalf of the Dutch national COVID-19 response team.                                                                                                                                                                                                                                                                                                                     |
| EPI_ISL_425401                                                                                                                                                                                                                                                                                                                                                                                                                                                                                                                                                                                                                                                                                                                                                                                                                                                                                                                                                                                                                                                                                                                                                                                                                                                                                                                                                                                                                                                                                                                                                                                                                                                                                                                                                                                                                                                                                                 | Department of Pathology, University of Cambridge                                                                        | COVID-19 Genomics UK (COG-UK) Consortium                                                                                | Luke W Meredith, M. Estee Torok , Myra Hosmillo, William L. Hamilton, Martin D. Curran, Theresa Feltwell, Anna Yakovleva, Charlotte J. Houldcroft, Aminu S. Jahun, Sarah L. Caddy, Ian Goodfellow                                                                                                                                                                                                                                                                                                                                                                                                                                                                                                                                                                                           |
| EPI_ISL_428234                                                                                                                                                                                                                                                                                                                                                                                                                                                                                                                                                                                                                                                                                                                                                                                                                                                                                                                                                                                                                                                                                                                                                                                                                                                                                                                                                                                                                                                                                                                                                                                                                                                                                                                                                                                                                                                                                                 | Hematology Laboratory, Section of Molecular Diagnostics, University Clinical Centre, Medical University of Gdansk       | Department of Virology, Faculty of Medicine, University of Helsinki, Helsinki, Finland                                  | Marlena Robakowska, Aneta Szulc, Maciej Grzybek, Olli Vapalahti, Teemu Smura                                                                                                                                                                                                                                                                                                                                                                                                                                                                                                                                                                                                                                                                                                                |
| EPI_ISL_434901                                                                                                                                                                                                                                                                                                                                                                                                                                                                                                                                                                                                                                                                                                                                                                                                                                                                                                                                                                                                                                                                                                                                                                                                                                                                                                                                                                                                                                                                                                                                                                                                                                                                                                                                                                                                                                                                                                 | Houston Methodist Hospital                                                                                              | Houston Methodist Hospital                                                                                              | S. Wesley Long, Randall J. Olsen, Paul A. Christensen, David W. Bernard, James J. Davis, Maulik Shukla, Marcus Nguyen, Matthew Ojeda Saavedra, Concepcion C. Cantu, Prasanti Yerramilli, Layne Pruitt, Sishir Subedi, Heather Hendrickson, Ghazaleh Eskandari, Muthiah Kumaraswami, Jason S. McLellan, Hakon Jonsson, Kari Stefansson, and James M. Musser                                                                                                                                                                                                                                                                                                                                                                                                                                  |
| EPI_ISL_440212, EPI_ISL_440256                                                                                                                                                                                                                                                                                                                                                                                                                                                                                                                                                                                                                                                                                                                                                                                                                                                                                                                                                                                                                                                                                                                                                                                                                                                                                                                                                                                                                                                                                                                                                                                                                                                                                                                                                                                                                                                                                 | PHE South West Regional Laboratory, National Infection Service                                                          | Wellcome Sanger Institute for the COVID-19 Genomics UK (COG-UK) consortium                                              | Stephanie Hutchings, Hannah Pymont, Dr Peter Muir, Barry Vipond, Rich Hopes, Alex Alderton, Roberto Amato, Sonia Goncalves, Ewan Harrison, David K. Jackson, Ian Johnston, Dominic Kwiatkowski, Cordelia Langford, John Sillitoe on behalf of the Wellcome Sanger Institute COVID-19 Surveillance Team ( <a href="http://www.sanger.ac.uk/covid-team">http://www.sanger.ac.uk/covid-team</a> )                                                                                                                                                                                                                                                                                                                                                                                              |
| EPI_ISL_440513                                                                                                                                                                                                                                                                                                                                                                                                                                                                                                                                                                                                                                                                                                                                                                                                                                                                                                                                                                                                                                                                                                                                                                                                                                                                                                                                                                                                                                                                                                                                                                                                                                                                                                                                                                                                                                                                                                 | Department of Pathology, University of Cambridge                                                                        | Wellcome Sanger Institute for the COVID-19 Genomics UK (COG-UK) consortium                                              | Luke W Meredith, M. Estée Török , Myra Hosmillo, William L. Hamilton, Martin D. Curran, Theresa Feltwell, Grant Hall, Anna Yakovleva, Fahad A Khokhar, Charlotte J. Houldcroft, Laura G Caller, Aminu S. Jahun, Sarah L. Caddy, Ian Goodfellow, Alex Alderton, Roberto Amato, Sonia Goncalves, Ewan Harrison, David K. Jackson, Ian Johnston, Dominic Kwiatkowski, Cordelia Langford, John Sillitoe on behalf of the Wellcome Sanger Institute COVID-19 Surveillance Team ( <a href="http://www.sanger.ac.uk/covid-team">http://www.sanger.ac.uk/covid-team</a> )                                                                                                                                                                                                                           |
| EPI_ISL_445727, EPI_ISL_446456, EPI_ISL_446537, EPI_ISL_446877, EPI_ISL_446878, EPI_ISL_446924, EPI_ISL_446925                                                                                                                                                                                                                                                                                                                                                                                                                                                                                                                                                                                                                                                                                                                                                                                                                                                                                                                                                                                                                                                                                                                                                                                                                                                                                                                                                                                                                                                                                                                                                                                                                                                                                                                                                                                                 | Wales Specialist Virology Centre                                                                                        | Public Health Wales Microbiology Cardiff                                                                                | Catherine Moore, Johnathan Evans, Laura Gifford, Malorie Perry, Simon Cottrell, Alec Birchley, Alexander Adams, Amy Gaskin, Bree Gatica-Wilcox, Jason Coombes, Lauren Gilbert, Lee Graham, Nicole Pacchiarini, Sara Kumziene-Summerhayes, Sarah Taylor, Sophie Jones, Sara Rey, Matthew Bull, Joanne Watkins, Sally Corden, Tom Connor                                                                                                                                                                                                                                                                                                                                                                                                                                                      |
| EPI_ISL_451307                                                                                                                                                                                                                                                                                                                                                                                                                                                                                                                                                                                                                                                                                                                                                                                                                                                                                                                                                                                                                                                                                                                                                                                                                                                                                                                                                                                                                                                                                                                                                                                                                                                                                                                                                                                                                                                                                                 | Molecular Virology Unit, Fondazione IRCCS Policlinico San Matteo , Pavia                                                | Laboratory of Virology, INMI Lazzaro Spallanzani IRCCS                                                                  | Fausto Baldanti, Antonio Piralla, Antonino Di Caro, Cesare E.M. Gruber, Martina Rucua, Barbara Bartolini, Maria R. Capobianchi                                                                                                                                                                                                                                                                                                                                                                                                                                                                                                                                                                                                                                                              |
| EPI_ISL_451754                                                                                                                                                                                                                                                                                                                                                                                                                                                                                                                                                                                                                                                                                                                                                                                                                                                                                                                                                                                                                                                                                                                                                                                                                                                                                                                                                                                                                                                                                                                                                                                                                                                                                                                                                                                                                                                                                                 | Viollier AG                                                                                                             | Department of Biosystems Science and Engineering, ETH Zürich                                                            | Christian Beisel, Sarah Nadeau, Ivan Topolsky, Pedro Ferreira, Philipp Jablonski, Susana Posada-Céspedes, Tobias Schär, Ina Nissen, Natascha Santacroce, Elodie Burcklen, Christiane Beckmann, Maurice Redondo, Olivier Kobel, Christoph Noppen, Sophie Seidel, Noemie Santamaria de Souza, Niko Beerenwinkel, Tanja Stadler                                                                                                                                                                                                                                                                                                                                                                                                                                                                |
| EPI_ISL_453825, EPI_ISL_453872, EPI_ISL_453875, EPI_ISL_453876, EPI_ISL_453881, EPI_ISL_453882, EPI_ISL_453883, EPI_ISL_453884, EPI_ISL_453885, EPI_ISL_453886, EPI_ISL_453904, EPI_ISL_453905, EPI_ISL_453906, EPI_ISL_453907, EPI_ISL_453909, EPI_ISL_453910, EPI_ISL_453911, EPI_ISL_453912, EPI_ISL_453913, EPI_ISL_453931, EPI_ISL_453932, EPI_ISL_453933, EPI_ISL_453934, EPI_ISL_453935, EPI_ISL_453942, EPI_ISL_453943, EPI_ISL_453944, EPI_ISL_453945, EPI_ISL_453946, EPI_ISL_453947, EPI_ISL_453948, EPI_ISL_453949, EPI_ISL_453950, EPI_ISL_453951, EPI_ISL_453952, EPI_ISL_453953, EPI_ISL_453955, EPI_ISL_453956, EPI_ISL_453957, EPI_ISL_453960, EPI_ISL_453961, EPI_ISL_453968, EPI_ISL_453969, EPI_ISL_453970, EPI_ISL_453979, EPI_ISL_453980, EPI_ISL_454004, EPI_ISL_454006, EPI_ISL_454009, EPI_ISL_454010, EPI_ISL_454014, EPI_ISL_454017, EPI_ISL_454018, EPI_ISL_454019, EPI_ISL_454024, EPI_ISL_454026, EPI_ISL_454029, EPI_ISL_454030, EPI_ISL_454034, EPI_ISL_454035, EPI_ISL_454037, EPI_ISL_454038, EPI_ISL_454040, EPI_ISL_454043, EPI_ISL_454052, EPI_ISL_454055, EPI_ISL_454056, EPI_ISL_454060, EPI_ISL_454063, EPI_ISL_454066, EPI_ISL_454067, EPI_ISL_454068, EPI_ISL_454069, EPI_ISL_454077, EPI_ISL_454081, EPI_ISL_454088, EPI_ISL_454095, EPI_ISL_454096, EPI_ISL_454098, EPI_ISL_454101, EPI_ISL_454111, EPI_ISL_454112, EPI_ISL_454113, EPI_ISL_454114, EPI_ISL_454115, EPI_ISL_454116, EPI_ISL_454119, EPI_ISL_454120, EPI_ISL_454121, EPI_ISL_454124, EPI_ISL_454125, EPI_ISL_454126, EPI_ISL_454206, EPI_ISL_454251, EPI_ISL_454252, EPI_ISL_454254, EPI_ISL_454260, EPI_ISL_454261, EPI_ISL_454263, EPI_ISL_454268, EPI_ISL_454271, EPI_ISL_454272, EPI_ISL_454274, EPI_ISL_454275, EPI_ISL_454276, EPI_ISL_454277, EPI_ISL_454278, EPI_ISL_454285, EPI_ISL_454286, EPI_ISL_454289, EPI_ISL_454327, EPI_ISL_454336, EPI_ISL_454343, EPI_ISL_454346, EPI_ISL_454349 | Instituto Nacional de Saude (INSA)                                                                                      | Borges et al                                                                                                            |                                                                                                                                                                                                                                                                                                                                                                                                                                                                                                                                                                                                                                                                                                                                                                                             |
| see above                                                                                                                                                                                                                                                                                                                                                                                                                                                                                                                                                                                                                                                                                                                                                                                                                                                                                                                                                                                                                                                                                                                                                                                                                                                                                                                                                                                                                                                                                                                                                                                                                                                                                                                                                                                                                                                                                                      | unknown                                                                                                                 | Instituto Nacional de Saude (INSA)                                                                                      | Borges et al                                                                                                                                                                                                                                                                                                                                                                                                                                                                                                                                                                                                                                                                                                                                                                                |
| EPI_ISL_454771                                                                                                                                                                                                                                                                                                                                                                                                                                                                                                                                                                                                                                                                                                                                                                                                                                                                                                                                                                                                                                                                                                                                                                                                                                                                                                                                                                                                                                                                                                                                                                                                                                                                                                                                                                                                                                                                                                 | Dutch COVID-19 response team                                                                                            | National Institute for Public Health and the Environment (RIVM)                                                         | Adam Meijer, Harry Vennema, Jeroen Cremer, Sharon van den Brink, Pieter Overduin, Florian Zwagemaker, Dennis Schmitz, Chantal Reusken, on behalf of the national COVID-19 response team                                                                                                                                                                                                                                                                                                                                                                                                                                                                                                                                                                                                     |
| EPI_ISL_456203                                                                                                                                                                                                                                                                                                                                                                                                                                                                                                                                                                                                                                                                                                                                                                                                                                                                                                                                                                                                                                                                                                                                                                                                                                                                                                                                                                                                                                                                                                                                                                                                                                                                                                                                                                                                                                                                                                 | LabPLUS                                                                                                                 | Institute of Environmental Science and Research (ESR)                                                                   | Matt Storey, Xiaoyun Ren, Anja Werno, Antje van der Linden, Arlo Upton, Chris Mansell, David Hammer, Dragana Drinkovic, Erasmus Smit, Gary McAuliffe, Hana Sofia Andersson, James Ussher, Jill Sherwood, Josh Freeman, Julia Howard, Juliet Ely, Mary DeAlmeida, Matt Blakiston, Matthew Rogers, Max Bloomfield, Michael Addie, Michelle Balm, Sally Roberts, Sarah Jefferies, Sharmira Muttaiyah, Susan Morpeth, Susan Taylor, Timothy Blackmore, Vani Sathyanandan, Veronica Playle, Virginia Hope, Erasmus Smit, Lauren Jelly, Joep de Lig                                                                                                                                                                                                                                               |
| EPI_ISL_456352, EPI_ISL_456356, EPI_ISL_456358, EPI_ISL_456362, EPI_ISL_456363, EPI_ISL_456364, EPI_ISL_456365, EPI_ISL_456366, EPI_ISL_456367, EPI_ISL_456369, EPI_ISL_456371, EPI_ISL_456372, EPI_ISL_456374                                                                                                                                                                                                                                                                                                                                                                                                                                                                                                                                                                                                                                                                                                                                                                                                                                                                                                                                                                                                                                                                                                                                                                                                                                                                                                                                                                                                                                                                                                                                                                                                                                                                                                 | Canterbury Health Laboratories                                                                                          | Institute of Environmental Science and Research (ESR)                                                                   | Matt Storey, Xiaoyun Ren, Anja Werno, Antje van der Linden, Arlo Upton, Chris Mansell, David Hammer, Dragana Drinkovic, Erasmus Smit, Gary                                                                                                                                                                                                                                                                                                                                                                                                                                                                                                                                                                                                                                                  |
| see above                                                                                                                                                                                                                                                                                                                                                                                                                                                                                                                                                                                                                                                                                                                                                                                                                                                                                                                                                                                                                                                                                                                                                                                                                                                                                                                                                                                                                                                                                                                                                                                                                                                                                                                                                                                                                                                                                                      | Canterbury Health Laboratories                                                                                          | Institute of Environmental Science and Research (ESR)                                                                   | Matt Storey, Xiaoyun Ren, Anja Werno, Antje van der Linden, Arlo Upton, Chris Mansell, David Hammer, Dragana Drinkovic, Erasmus Smit, Gary                                                                                                                                                                                                                                                                                                                                                                                                                                                                                                                                                                                                                                                  |

|                                                                                                                                                                                                                                                                                                                                                                                                                                                                                                                                                                                                                                                                                                                                                                                                                                                                                                                                                                                                                                                                                                                                                                                                                                                                                                                                                                                                                                                                                                                                                                                                                                                                                                                                                                                                                                                                                                                                                                                                                                                                                                                                                                                                                                                                                                                                                                                                                                                                                                                                                                                                                                                                                                                                                                                                                                                                                                                                                                                                                                                                                                                                                                                                                                                                                                                                                                                                                                                                                                                                                                                                                                                                                                                                                                                                                                                                                                                                                                                                                                                                                                                                                                                                                                                                                                                                                                                                                                                                                                |                                                                                                                                                                                                                                                                                              |                                                                                                                                                                                                                                                                                                                                                                                                      |                                                                                                                                                                                                                                                                                                                                                                                                                                                                                                                                                                                                                                                                                          |              |
|------------------------------------------------------------------------------------------------------------------------------------------------------------------------------------------------------------------------------------------------------------------------------------------------------------------------------------------------------------------------------------------------------------------------------------------------------------------------------------------------------------------------------------------------------------------------------------------------------------------------------------------------------------------------------------------------------------------------------------------------------------------------------------------------------------------------------------------------------------------------------------------------------------------------------------------------------------------------------------------------------------------------------------------------------------------------------------------------------------------------------------------------------------------------------------------------------------------------------------------------------------------------------------------------------------------------------------------------------------------------------------------------------------------------------------------------------------------------------------------------------------------------------------------------------------------------------------------------------------------------------------------------------------------------------------------------------------------------------------------------------------------------------------------------------------------------------------------------------------------------------------------------------------------------------------------------------------------------------------------------------------------------------------------------------------------------------------------------------------------------------------------------------------------------------------------------------------------------------------------------------------------------------------------------------------------------------------------------------------------------------------------------------------------------------------------------------------------------------------------------------------------------------------------------------------------------------------------------------------------------------------------------------------------------------------------------------------------------------------------------------------------------------------------------------------------------------------------------------------------------------------------------------------------------------------------------------------------------------------------------------------------------------------------------------------------------------------------------------------------------------------------------------------------------------------------------------------------------------------------------------------------------------------------------------------------------------------------------------------------------------------------------------------------------------------------------------------------------------------------------------------------------------------------------------------------------------------------------------------------------------------------------------------------------------------------------------------------------------------------------------------------------------------------------------------------------------------------------------------------------------------------------------------------------------------------------------------------------------------------------------------------------------------------------------------------------------------------------------------------------------------------------------------------------------------------------------------------------------------------------------------------------------------------------------------------------------------------------------------------------------------------------------------------------------------------------------------------------------------------------|----------------------------------------------------------------------------------------------------------------------------------------------------------------------------------------------------------------------------------------------------------------------------------------------|------------------------------------------------------------------------------------------------------------------------------------------------------------------------------------------------------------------------------------------------------------------------------------------------------------------------------------------------------------------------------------------------------|------------------------------------------------------------------------------------------------------------------------------------------------------------------------------------------------------------------------------------------------------------------------------------------------------------------------------------------------------------------------------------------------------------------------------------------------------------------------------------------------------------------------------------------------------------------------------------------------------------------------------------------------------------------------------------------|--------------|
|                                                                                                                                                                                                                                                                                                                                                                                                                                                                                                                                                                                                                                                                                                                                                                                                                                                                                                                                                                                                                                                                                                                                                                                                                                                                                                                                                                                                                                                                                                                                                                                                                                                                                                                                                                                                                                                                                                                                                                                                                                                                                                                                                                                                                                                                                                                                                                                                                                                                                                                                                                                                                                                                                                                                                                                                                                                                                                                                                                                                                                                                                                                                                                                                                                                                                                                                                                                                                                                                                                                                                                                                                                                                                                                                                                                                                                                                                                                                                                                                                                                                                                                                                                                                                                                                                                                                                                                                                                                                                                |                                                                                                                                                                                                                                                                                              | McAuliffe, Hana Sofia Andersson, James Ussher, Jill Sherwood, Josh Freeman, Julia Howard, Juliet Elvy, Mary DeAlmeida, Matt Blakiston, Matthew Rogers, Max Bloomfield, Michael Addidle, Michelle Balm, Sally Roberts, Sarah Jefferies, Sharmini Muttaiyah, Susan Morpeth, Susan Taylor, Timothy Blackmore, Vani Sathyendran, Veronica Playle, Virginia Hope, Erasmus Smit, Lauren Jelly, Joep de Lig |                                                                                                                                                                                                                                                                                                                                                                                                                                                                                                                                                                                                                                                                                          |              |
| EPI_ISL_457112, EPI_ISL_457116                                                                                                                                                                                                                                                                                                                                                                                                                                                                                                                                                                                                                                                                                                                                                                                                                                                                                                                                                                                                                                                                                                                                                                                                                                                                                                                                                                                                                                                                                                                                                                                                                                                                                                                                                                                                                                                                                                                                                                                                                                                                                                                                                                                                                                                                                                                                                                                                                                                                                                                                                                                                                                                                                                                                                                                                                                                                                                                                                                                                                                                                                                                                                                                                                                                                                                                                                                                                                                                                                                                                                                                                                                                                                                                                                                                                                                                                                                                                                                                                                                                                                                                                                                                                                                                                                                                                                                                                                                                                 | University of Exeter                                                                                                                                                                                                                                                                         | COVID-19 Genomics UK (COG-UK) Consortium                                                                                                                                                                                                                                                                                                                                                             | Ben Temperton, Aaron Jeffries, Michelle Michelsen, Joanna Warwick-Dugdale, Audrey Farbos, Robyn Manley, Stephen Michell, Jane Masoli                                                                                                                                                                                                                                                                                                                                                                                                                                                                                                                                                     |              |
| EPI_ISL_461314                                                                                                                                                                                                                                                                                                                                                                                                                                                                                                                                                                                                                                                                                                                                                                                                                                                                                                                                                                                                                                                                                                                                                                                                                                                                                                                                                                                                                                                                                                                                                                                                                                                                                                                                                                                                                                                                                                                                                                                                                                                                                                                                                                                                                                                                                                                                                                                                                                                                                                                                                                                                                                                                                                                                                                                                                                                                                                                                                                                                                                                                                                                                                                                                                                                                                                                                                                                                                                                                                                                                                                                                                                                                                                                                                                                                                                                                                                                                                                                                                                                                                                                                                                                                                                                                                                                                                                                                                                                                                 | Dutch COVID-19 response team                                                                                                                                                                                                                                                                 | Erasmus Medical Center                                                                                                                                                                                                                                                                                                                                                                               | Bas Oude Munnink, David Nieuwenhuijse, Reina Sikkema, Claudia Schapendonk, Irina Chestakova, Anne van der Linden, Theo Bestebroer, Jeroen van Nieuwkoop, Mark Pronk, Pascal Lexmond, Corien Swaan, Manon Haverkate, Madelif Molters, Mart Stein, Sandra Kenge Kamga Mbou, Stefan van Kampen, Jolanda Voermans, Aura Timen, Corine GeurtsvanKessel, Annetiek van der Eijk, Richard Molenkamp, Marion Koopmans, on behalf of the Dutch national COVID-19 response team.                                                                                                                                                                                                                    |              |
| EPI_ISL_464290, EPI_ISL_464362, EPI_ISL_464413, EPI_ISL_464442, EPI_ISL_464459, EPI_ISL_464527, EPI_ISL_464577, EPI_ISL_464672, EPI_ISL_464713, EPI_ISL_464724, EPI_ISL_465007                                                                                                                                                                                                                                                                                                                                                                                                                                                                                                                                                                                                                                                                                                                                                                                                                                                                                                                                                                                                                                                                                                                                                                                                                                                                                                                                                                                                                                                                                                                                                                                                                                                                                                                                                                                                                                                                                                                                                                                                                                                                                                                                                                                                                                                                                                                                                                                                                                                                                                                                                                                                                                                                                                                                                                                                                                                                                                                                                                                                                                                                                                                                                                                                                                                                                                                                                                                                                                                                                                                                                                                                                                                                                                                                                                                                                                                                                                                                                                                                                                                                                                                                                                                                                                                                                                                 |                                                                                                                                                                                                                                                                                              |                                                                                                                                                                                                                                                                                                                                                                                                      |                                                                                                                                                                                                                                                                                                                                                                                                                                                                                                                                                                                                                                                                                          |              |
| see above                                                                                                                                                                                                                                                                                                                                                                                                                                                                                                                                                                                                                                                                                                                                                                                                                                                                                                                                                                                                                                                                                                                                                                                                                                                                                                                                                                                                                                                                                                                                                                                                                                                                                                                                                                                                                                                                                                                                                                                                                                                                                                                                                                                                                                                                                                                                                                                                                                                                                                                                                                                                                                                                                                                                                                                                                                                                                                                                                                                                                                                                                                                                                                                                                                                                                                                                                                                                                                                                                                                                                                                                                                                                                                                                                                                                                                                                                                                                                                                                                                                                                                                                                                                                                                                                                                                                                                                                                                                                                      | Respiratory Virus Unit, Microbiology Services Colindale, Public Health England                                                                                                                                                                                                               | Respiratory Virus Unit, Microbiology Services Colindale, Public Health England                                                                                                                                                                                                                                                                                                                       | PHE Covid Sequencing Team                                                                                                                                                                                                                                                                                                                                                                                                                                                                                                                                                                                                                                                                |              |
| EPI_ISL_468293                                                                                                                                                                                                                                                                                                                                                                                                                                                                                                                                                                                                                                                                                                                                                                                                                                                                                                                                                                                                                                                                                                                                                                                                                                                                                                                                                                                                                                                                                                                                                                                                                                                                                                                                                                                                                                                                                                                                                                                                                                                                                                                                                                                                                                                                                                                                                                                                                                                                                                                                                                                                                                                                                                                                                                                                                                                                                                                                                                                                                                                                                                                                                                                                                                                                                                                                                                                                                                                                                                                                                                                                                                                                                                                                                                                                                                                                                                                                                                                                                                                                                                                                                                                                                                                                                                                                                                                                                                                                                 | Viollier AG                                                                                                                                                                                                                                                                                  | Department of Biosystems Science and Engineering, ETH Zürich                                                                                                                                                                                                                                                                                                                                         | Christian Beisel, Sarah Nadeau, Ivan Topolsky, Pedro Ferreira, Philipp Jablonski, Susana Posada-Céspedes, Tobias Schär, Ina Nissen, Natascha Santacroce, Elodie Burcklen, Christiane Beckmann, Maurice Redondo, Olivier Kobel, Christoph Noppen, Sophie Seidel, Noemie Santamaria de Souza, Niko Beerenwinkel, Tanja Stadler                                                                                                                                                                                                                                                                                                                                                             |              |
| EPI_ISL_471924                                                                                                                                                                                                                                                                                                                                                                                                                                                                                                                                                                                                                                                                                                                                                                                                                                                                                                                                                                                                                                                                                                                                                                                                                                                                                                                                                                                                                                                                                                                                                                                                                                                                                                                                                                                                                                                                                                                                                                                                                                                                                                                                                                                                                                                                                                                                                                                                                                                                                                                                                                                                                                                                                                                                                                                                                                                                                                                                                                                                                                                                                                                                                                                                                                                                                                                                                                                                                                                                                                                                                                                                                                                                                                                                                                                                                                                                                                                                                                                                                                                                                                                                                                                                                                                                                                                                                                                                                                                                                 | University of Exeter                                                                                                                                                                                                                                                                         | COVID-19 Genomics UK (COG-UK) Consortium                                                                                                                                                                                                                                                                                                                                                             | Ben Temperton, Aaron Jeffries, Michelle Michelsen, Joanna Warwick-Dugdale, Audrey Farbos, Robyn Manley, Stephen Michell, Jane Masoli                                                                                                                                                                                                                                                                                                                                                                                                                                                                                                                                                     |              |
| EPI_ISL_472471, EPI_ISL_472997                                                                                                                                                                                                                                                                                                                                                                                                                                                                                                                                                                                                                                                                                                                                                                                                                                                                                                                                                                                                                                                                                                                                                                                                                                                                                                                                                                                                                                                                                                                                                                                                                                                                                                                                                                                                                                                                                                                                                                                                                                                                                                                                                                                                                                                                                                                                                                                                                                                                                                                                                                                                                                                                                                                                                                                                                                                                                                                                                                                                                                                                                                                                                                                                                                                                                                                                                                                                                                                                                                                                                                                                                                                                                                                                                                                                                                                                                                                                                                                                                                                                                                                                                                                                                                                                                                                                                                                                                                                                 | Wales Specialist Virology Centre Sequencing lab: Pathogen Genomics Unit                                                                                                                                                                                                                      | COVID-19 Genomics UK (COG-UK) Consortium                                                                                                                                                                                                                                                                                                                                                             | Catherine Moore, Johnathan Evans, Laura Gifford, Malorie Perry, Simon Cottrell, Angela Marchbank, Alec Birchley, Alexander Adams, Amy Gaskin, Bree Gatica-Wilcox, Jason Coombes, Joel Southgate, Lauren Gilbert, Lee Graham, Nicole Pacchiarini, Sara Kumziene-Summerhayes, Sarah Taylor, Sophie Jones, Sara Rey, Matthew Bull, Joanne Watkins, Sally Corden, Tom Connor                                                                                                                                                                                                                                                                                                                 |              |
| EPI_ISL_474087, EPI_ISL_474518, EPI_ISL_474594                                                                                                                                                                                                                                                                                                                                                                                                                                                                                                                                                                                                                                                                                                                                                                                                                                                                                                                                                                                                                                                                                                                                                                                                                                                                                                                                                                                                                                                                                                                                                                                                                                                                                                                                                                                                                                                                                                                                                                                                                                                                                                                                                                                                                                                                                                                                                                                                                                                                                                                                                                                                                                                                                                                                                                                                                                                                                                                                                                                                                                                                                                                                                                                                                                                                                                                                                                                                                                                                                                                                                                                                                                                                                                                                                                                                                                                                                                                                                                                                                                                                                                                                                                                                                                                                                                                                                                                                                                                 | Originating lab: Wales Specialist Virology Centre Sequencing lab: Pathogen Genomics Unit                                                                                                                                                                                                     | COVID-19 Genomics UK (COG-UK) Consortium                                                                                                                                                                                                                                                                                                                                                             | Catherine Moore, Johnathan Evans, Laura Gifford, Malorie Perry, Simon Cottrell, Angela Marchbank, Alec Birchley, Alexander Adams, Amy Gaskin, Bree Gatica-Wilcox, Jason Coombes, Joel Southgate, Lauren Gilbert, Lee Graham, Nicole Pacchiarini, Sara Kumziene-Summerhayes, Sarah Taylor, Sophie Jones, Sara Rey, Matthew Bull, Joanne Watkins, Sally Corden, Tom Connor                                                                                                                                                                                                                                                                                                                 |              |
| EPI_ISL_475834                                                                                                                                                                                                                                                                                                                                                                                                                                                                                                                                                                                                                                                                                                                                                                                                                                                                                                                                                                                                                                                                                                                                                                                                                                                                                                                                                                                                                                                                                                                                                                                                                                                                                                                                                                                                                                                                                                                                                                                                                                                                                                                                                                                                                                                                                                                                                                                                                                                                                                                                                                                                                                                                                                                                                                                                                                                                                                                                                                                                                                                                                                                                                                                                                                                                                                                                                                                                                                                                                                                                                                                                                                                                                                                                                                                                                                                                                                                                                                                                                                                                                                                                                                                                                                                                                                                                                                                                                                                                                 | Austrian Agency for Health and Food Safety (AGES)                                                                                                                                                                                                                                            | Bergthaler laboratory, CeMM Research Center for Molecular Medicine of the Austrian Academy of Sciences                                                                                                                                                                                                                                                                                               | Alexandra Popa, Benedikt Agerer, Henrique Colaco, Lukas Endler, Jakob-Wendelin Genger, Alexander Lercher, Mark Smyth, Thomas Penz, Michael Schuster, Jan Laine, Martin Senekowitsch, Judith Aberle, Stephan Aberle, Peter Hufnagl, Daniela Schmid, Frank Allerberger, Elisabeth Puchhammer-Stoockl, Manfred Nairz, Guenter Weiss, Gregor Hörmann, Kinga Rigler-Hohenwarter, Rainer Gattringer, Wegene Borena, Dorothee von Laer, Christoph Bock, Andreas Bergthaler                                                                                                                                                                                                                      |              |
| EPI_ISL_477223                                                                                                                                                                                                                                                                                                                                                                                                                                                                                                                                                                                                                                                                                                                                                                                                                                                                                                                                                                                                                                                                                                                                                                                                                                                                                                                                                                                                                                                                                                                                                                                                                                                                                                                                                                                                                                                                                                                                                                                                                                                                                                                                                                                                                                                                                                                                                                                                                                                                                                                                                                                                                                                                                                                                                                                                                                                                                                                                                                                                                                                                                                                                                                                                                                                                                                                                                                                                                                                                                                                                                                                                                                                                                                                                                                                                                                                                                                                                                                                                                                                                                                                                                                                                                                                                                                                                                                                                                                                                                 | Institute for Stem Cell Science and Regenerative Medicine                                                                                                                                                                                                                                    | National Centre for Biological Sciences                                                                                                                                                                                                                                                                                                                                                              | Farhan Ali, Vanessa Molin Paynter, Srikrishna, Mohak Sharda, Shah-e-Jahan Gulzar, Awadhesh Pandit, Varadha Sundarmurthy, Uma Ramakrishnan, Dasaradhi Palakodeti, Aswin Seshasayee                                                                                                                                                                                                                                                                                                                                                                                                                                                                                                        |              |
| EPI_ISL_478896                                                                                                                                                                                                                                                                                                                                                                                                                                                                                                                                                                                                                                                                                                                                                                                                                                                                                                                                                                                                                                                                                                                                                                                                                                                                                                                                                                                                                                                                                                                                                                                                                                                                                                                                                                                                                                                                                                                                                                                                                                                                                                                                                                                                                                                                                                                                                                                                                                                                                                                                                                                                                                                                                                                                                                                                                                                                                                                                                                                                                                                                                                                                                                                                                                                                                                                                                                                                                                                                                                                                                                                                                                                                                                                                                                                                                                                                                                                                                                                                                                                                                                                                                                                                                                                                                                                                                                                                                                                                                 | Oxford Viromics, NDM, University of Oxford; Oxford University Hospitals; Basingstoke and North Hampshire Hospital                                                                                                                                                                            | COVID-19 Genomics UK (COG-UK) Consortium                                                                                                                                                                                                                                                                                                                                                             | Tanya Golubchik, David Bonsall, George Macintyre, Amy Trebes, Mariateresa de Cesare, Catrin Moore, Alex Mobbs, Anita Justice, Robert Shaw, Monique Andersson, Timothy Peto, Emma Wise, Nathan Moore, Jessica Lynch, Nick Cortes, Matilde Mori, Stephen Kidd, David Buck, John Todd, Christophe Fraser                                                                                                                                                                                                                                                                                                                                                                                    |              |
| EPI_ISL_481951                                                                                                                                                                                                                                                                                                                                                                                                                                                                                                                                                                                                                                                                                                                                                                                                                                                                                                                                                                                                                                                                                                                                                                                                                                                                                                                                                                                                                                                                                                                                                                                                                                                                                                                                                                                                                                                                                                                                                                                                                                                                                                                                                                                                                                                                                                                                                                                                                                                                                                                                                                                                                                                                                                                                                                                                                                                                                                                                                                                                                                                                                                                                                                                                                                                                                                                                                                                                                                                                                                                                                                                                                                                                                                                                                                                                                                                                                                                                                                                                                                                                                                                                                                                                                                                                                                                                                                                                                                                                                 | PHE South West Regional Laboratory, National Infection Service                                                                                                                                                                                                                               | Wellcome Sanger Institute for the COVID-19 Genomics UK (COG-UK) consortium                                                                                                                                                                                                                                                                                                                           | Stephanie Hutchings, Hannah Pymont, Dr Peter Muir, Barry Vipond, Rich Hopes; and Alex Alderton, Roberto Amato, Sonia Goncalves, Ewan Harrison, David K. Jackson, Ian Johnston, Dominic Kwiatkowski, Cordelia Langford, John Sillitoe on behalf of the Wellcome Sanger Institute COVID-19 Surveillance Team ( <a href="http://www.sanger.ac.uk/covid-team">http://www.sanger.ac.uk/covid-team</a> )                                                                                                                                                                                                                                                                                       |              |
| EPI_ISL_482059, EPI_ISL_482060                                                                                                                                                                                                                                                                                                                                                                                                                                                                                                                                                                                                                                                                                                                                                                                                                                                                                                                                                                                                                                                                                                                                                                                                                                                                                                                                                                                                                                                                                                                                                                                                                                                                                                                                                                                                                                                                                                                                                                                                                                                                                                                                                                                                                                                                                                                                                                                                                                                                                                                                                                                                                                                                                                                                                                                                                                                                                                                                                                                                                                                                                                                                                                                                                                                                                                                                                                                                                                                                                                                                                                                                                                                                                                                                                                                                                                                                                                                                                                                                                                                                                                                                                                                                                                                                                                                                                                                                                                                                 | The Department of Microbiology, Torbay and South Devon NHS Foundation Trust                                                                                                                                                                                                                  | Wellcome Sanger Institute for the COVID-19 Genomics UK (COG-UK) consortium                                                                                                                                                                                                                                                                                                                           | Amy Hurd, Sophie Lloyd, Anthony Mogridge, Jack Howe, Helen Brown, Gary Booth, Mel Brown, Cheryl Bailiss, Michelle Harrison and Alex Alderton, Roberto Amato, Sonia Goncalves, Ewan Harrison, David K. Jackson, Ian Johnston, Dominic Kwiatkowski, Cordelia Langford, John Sillitoe on behalf of the Wellcome Sanger Institute COVID-19 Surveillance Team ( <a href="http://www.sanger.ac.uk/covid-team">http://www.sanger.ac.uk/covid-team</a> )                                                                                                                                                                                                                                         |              |
| EPI_ISL_486454                                                                                                                                                                                                                                                                                                                                                                                                                                                                                                                                                                                                                                                                                                                                                                                                                                                                                                                                                                                                                                                                                                                                                                                                                                                                                                                                                                                                                                                                                                                                                                                                                                                                                                                                                                                                                                                                                                                                                                                                                                                                                                                                                                                                                                                                                                                                                                                                                                                                                                                                                                                                                                                                                                                                                                                                                                                                                                                                                                                                                                                                                                                                                                                                                                                                                                                                                                                                                                                                                                                                                                                                                                                                                                                                                                                                                                                                                                                                                                                                                                                                                                                                                                                                                                                                                                                                                                                                                                                                                 | Viollier AG                                                                                                                                                                                                                                                                                  | Department of Biosystems Science and Engineering, ETH Zürich                                                                                                                                                                                                                                                                                                                                         | Christian Beisel, Sarah Nadeau, Ivan Topolsky, Pedro Ferreira, Philipp Jablonski, Susana Posada-Céspedes, Tobias Schär, Ina Nissen, Natascha Santacroce, Elodie Burcklen, Christiane Beckmann, Maurice Redondo, Olivier Kobel, Christoph Noppen, Sophie Seidel, Noemie Santamaria de Souza, Niko Beerenwinkel, Tanja Stadler                                                                                                                                                                                                                                                                                                                                                             |              |
| EPI_ISL_488219, EPI_ISL_488253, EPI_ISL_488265, EPI_ISL_488309, EPI_ISL_488349, EPI_ISL_488372                                                                                                                                                                                                                                                                                                                                                                                                                                                                                                                                                                                                                                                                                                                                                                                                                                                                                                                                                                                                                                                                                                                                                                                                                                                                                                                                                                                                                                                                                                                                                                                                                                                                                                                                                                                                                                                                                                                                                                                                                                                                                                                                                                                                                                                                                                                                                                                                                                                                                                                                                                                                                                                                                                                                                                                                                                                                                                                                                                                                                                                                                                                                                                                                                                                                                                                                                                                                                                                                                                                                                                                                                                                                                                                                                                                                                                                                                                                                                                                                                                                                                                                                                                                                                                                                                                                                                                                                 | PHE South West Regional Laboratory, National Infection Service                                                                                                                                                                                                                               | Wellcome Sanger Institute for the COVID-19 Genomics UK (COG-UK) consortium                                                                                                                                                                                                                                                                                                                           | Stephanie Hutchings, Hannah Pymont, Dr Peter Muir, Barry Vipond, Rich Hopes; and Alex Alderton, Roberto Amato, Sonia Goncalves, Ewan Harrison, David K. Jackson, Ian Johnston, Dominic Kwiatkowski, Cordelia Langford, John Sillitoe on behalf of the Wellcome Sanger Institute COVID-19 Surveillance Team ( <a href="http://www.sanger.ac.uk/covid-team">http://www.sanger.ac.uk/covid-team</a> )                                                                                                                                                                                                                                                                                       |              |
| EPI_ISL_492072                                                                                                                                                                                                                                                                                                                                                                                                                                                                                                                                                                                                                                                                                                                                                                                                                                                                                                                                                                                                                                                                                                                                                                                                                                                                                                                                                                                                                                                                                                                                                                                                                                                                                                                                                                                                                                                                                                                                                                                                                                                                                                                                                                                                                                                                                                                                                                                                                                                                                                                                                                                                                                                                                                                                                                                                                                                                                                                                                                                                                                                                                                                                                                                                                                                                                                                                                                                                                                                                                                                                                                                                                                                                                                                                                                                                                                                                                                                                                                                                                                                                                                                                                                                                                                                                                                                                                                                                                                                                                 | 1. ViroGenetics - BSL3 Laboratory of Virology, Maopolska Centre of Biotechnology, Jagiellonian University; 2. II Department of Internal Medicine, Faculty of Medicine, Jagiellonian University Medical College; 3. Narodowy Instytut Zdrowia Publicznego - Pastwowy Zakad Higieny (NIZP-PZH) | 1. ViroGenetics - BSL3 Laboratory of Virology, Maopolska Centre of Biotechnology, Jagiellonian University; 2. II Department of Internal Medicine, Faculty of Medicine, Jagiellonian University Medical College; 3. Narodowy Instytut Zdrowia Publicznego - Pastwowy Zakad Higieny (NIZP-PZH).                                                                                                        | Katarzyna Pancer, Marek Sanak, Aleksandra A. Zasada, Magdalena Rzeczkowska, Tomasz Wokowicz, Katarzyna Zacharczuk, Agnieszka Koakowska-Kulesza, Katarzyna Owczarek, Aleksandra Milewska, Natalia Wolaniuk, Ewelina Hallman-Szeliska, Pawe P abaj, Wojciech Branicki, Krzysztof Pyr                                                                                                                                                                                                                                                                                                                                                                                                       |              |
| EPI_ISL_492418, EPI_ISL_492595, EPI_ISL_492618                                                                                                                                                                                                                                                                                                                                                                                                                                                                                                                                                                                                                                                                                                                                                                                                                                                                                                                                                                                                                                                                                                                                                                                                                                                                                                                                                                                                                                                                                                                                                                                                                                                                                                                                                                                                                                                                                                                                                                                                                                                                                                                                                                                                                                                                                                                                                                                                                                                                                                                                                                                                                                                                                                                                                                                                                                                                                                                                                                                                                                                                                                                                                                                                                                                                                                                                                                                                                                                                                                                                                                                                                                                                                                                                                                                                                                                                                                                                                                                                                                                                                                                                                                                                                                                                                                                                                                                                                                                 | PHE South West Regional Laboratory, National Infection Service                                                                                                                                                                                                                               | Wellcome Sanger Institute for the COVID-19 Genomics UK (COG-UK) consortium                                                                                                                                                                                                                                                                                                                           | Stephanie Hutchings, Hannah Pymont, Dr Peter Muir, Barry Vipond, Rich Hopes; and Alex Alderton, Roberto Amato, Sonia Goncalves, Ewan Harrison, David K. Jackson, Ian Johnston, Dominic Kwiatkowski, Cordelia Langford, John Sillitoe on behalf of the Wellcome Sanger Institute COVID-19 Surveillance Team ( <a href="http://www.sanger.ac.uk/covid-team">http://www.sanger.ac.uk/covid-team</a> )                                                                                                                                                                                                                                                                                       |              |
| EPI_ISL_494280                                                                                                                                                                                                                                                                                                                                                                                                                                                                                                                                                                                                                                                                                                                                                                                                                                                                                                                                                                                                                                                                                                                                                                                                                                                                                                                                                                                                                                                                                                                                                                                                                                                                                                                                                                                                                                                                                                                                                                                                                                                                                                                                                                                                                                                                                                                                                                                                                                                                                                                                                                                                                                                                                                                                                                                                                                                                                                                                                                                                                                                                                                                                                                                                                                                                                                                                                                                                                                                                                                                                                                                                                                                                                                                                                                                                                                                                                                                                                                                                                                                                                                                                                                                                                                                                                                                                                                                                                                                                                 | Originating lab: Wales Specialist Virology Centre Sequencing lab: Pathogen Genomics Unit                                                                                                                                                                                                     | COVID-19 Genomics UK (COG-UK) Consortium                                                                                                                                                                                                                                                                                                                                                             | Catherine Moore, Johnathan Evans, Laura Gifford, Malorie Perry, Simon Cottrell, Angela Marchbank, Alec Birchley, Alexander Adams, Amy Gaskin, Bree Gatica-Wilcox, Jason Coombes, Joel Southgate, Lauren Gilbert, Lee Graham, Nicole Pacchiarini, Sara Kumziene-Summerhayes, Sarah Taylor, Sophie Jones, Sara Rey, Matthew Bull, Joanne Watkins, Sally Corden, Tom Connor                                                                                                                                                                                                                                                                                                                 |              |
| EPI_ISL_499827, EPI_ISL_499865, EPI_ISL_499943                                                                                                                                                                                                                                                                                                                                                                                                                                                                                                                                                                                                                                                                                                                                                                                                                                                                                                                                                                                                                                                                                                                                                                                                                                                                                                                                                                                                                                                                                                                                                                                                                                                                                                                                                                                                                                                                                                                                                                                                                                                                                                                                                                                                                                                                                                                                                                                                                                                                                                                                                                                                                                                                                                                                                                                                                                                                                                                                                                                                                                                                                                                                                                                                                                                                                                                                                                                                                                                                                                                                                                                                                                                                                                                                                                                                                                                                                                                                                                                                                                                                                                                                                                                                                                                                                                                                                                                                                                                 | Liverpool Clinical Laboratories                                                                                                                                                                                                                                                              | COVID-19 Genomics UK (COG-UK) Consortium                                                                                                                                                                                                                                                                                                                                                             | Sam Haldenby, Anita Lucaci, Steve Paterson, Julian Hiscox, Alistair Darby, M Almsaud, A Alrezaihi, Muhannad Alruwaili, Stuart D Armstrong, Jones Benjamin, Eleanor G Bentley, Anu Chawla, Jordan J Clark, Angela Cowell, Richard Eccles, Isabel Garcia-Dorival, Matthew Gemmiell, Alessandro Gerada, PKF Gilmore, Richard Gregory, Ximeng Han, Catherine Hartley, Margaret Hughes, Miren Iturriza-Gomara, James Johnson, L Luu, Jenifer Manson, Charlotte Nelson, Elaine O'Toole, Cassie Olateju, Rebekah Penrice-Randal, Lucille Rainbow, N.P Randle, Trevor Ian Robinson, Parul Sharma, Ghada T Shawli, James P Stewart, Neil Swainston, Ecaterina Vamos, Joanne Watts, Mark Whitehead |              |
| EPI_ISL_508124                                                                                                                                                                                                                                                                                                                                                                                                                                                                                                                                                                                                                                                                                                                                                                                                                                                                                                                                                                                                                                                                                                                                                                                                                                                                                                                                                                                                                                                                                                                                                                                                                                                                                                                                                                                                                                                                                                                                                                                                                                                                                                                                                                                                                                                                                                                                                                                                                                                                                                                                                                                                                                                                                                                                                                                                                                                                                                                                                                                                                                                                                                                                                                                                                                                                                                                                                                                                                                                                                                                                                                                                                                                                                                                                                                                                                                                                                                                                                                                                                                                                                                                                                                                                                                                                                                                                                                                                                                                                                 | SA Pathology                                                                                                                                                                                                                                                                                 | SA Pathology                                                                                                                                                                                                                                                                                                                                                                                         | Lex Leong, Chuan Kok Lim, Mark Turra, Ivan Bastian, Geoff Higgins                                                                                                                                                                                                                                                                                                                                                                                                                                                                                                                                                                                                                        |              |
| EPI_ISL_510891, EPI_ISL_510892, EPI_ISL_510894, EPI_ISL_510895, EPI_ISL_510897, EPI_ISL_510899, EPI_ISL_510902, EPI_ISL_510907, EPI_ISL_510911, EPI_ISL_510912, EPI_ISL_510915, EPI_ISL_510917, EPI_ISL_510918, EPI_ISL_510920, EPI_ISL_510922, EPI_ISL_510923, EPI_ISL_510925, EPI_ISL_510926, EPI_ISL_510927, EPI_ISL_510930, EPI_ISL_510931, EPI_ISL_510932, EPI_ISL_510933, EPI_ISL_510934, EPI_ISL_510935, EPI_ISL_510936, EPI_ISL_510937, EPI_ISL_510938, EPI_ISL_510939, EPI_ISL_510940, EPI_ISL_510941, EPI_ISL_510942, EPI_ISL_510943, EPI_ISL_510944, EPI_ISL_510945, EPI_ISL_510946, EPI_ISL_510947, EPI_ISL_510948, EPI_ISL_510949, EPI_ISL_510950, EPI_ISL_510951, EPI_ISL_510952, EPI_ISL_510953, EPI_ISL_510954, EPI_ISL_510955, EPI_ISL_510956, EPI_ISL_510957, EPI_ISL_510958, EPI_ISL_510959, EPI_ISL_510960, EPI_ISL_510961, EPI_ISL_510962, EPI_ISL_510963, EPI_ISL_510964, EPI_ISL_510965, EPI_ISL_510966, EPI_ISL_510967, EPI_ISL_510968, EPI_ISL_510969, EPI_ISL_510970, EPI_ISL_510971, EPI_ISL_510972, EPI_ISL_510973, EPI_ISL_510974, EPI_ISL_510975, EPI_ISL_510976, EPI_ISL_510977, EPI_ISL_510978, EPI_ISL_510979, EPI_ISL_510980, EPI_ISL_510981, EPI_ISL_510982, EPI_ISL_510983, EPI_ISL_510984, EPI_ISL_510985, EPI_ISL_510986, EPI_ISL_510987, EPI_ISL_510988, EPI_ISL_510989, EPI_ISL_510990, EPI_ISL_510991, EPI_ISL_510992, EPI_ISL_510993, EPI_ISL_510994, EPI_ISL_510995, EPI_ISL_510996, EPI_ISL_510997, EPI_ISL_510998, EPI_ISL_510999, EPI_ISL_511000, EPI_ISL_511001, EPI_ISL_511002, EPI_ISL_511003, EPI_ISL_511004, EPI_ISL_511005, EPI_ISL_511006, EPI_ISL_511007, EPI_ISL_511008, EPI_ISL_511009, EPI_ISL_511010, EPI_ISL_511011, EPI_ISL_511012, EPI_ISL_511013, EPI_ISL_511014, EPI_ISL_511015, EPI_ISL_511016, EPI_ISL_511017, EPI_ISL_511018, EPI_ISL_511019, EPI_ISL_511020, EPI_ISL_511021, EPI_ISL_511022, EPI_ISL_511023, EPI_ISL_511024, EPI_ISL_511025, EPI_ISL_511026, EPI_ISL_511027, EPI_ISL_511028, EPI_ISL_511029, EPI_ISL_511030, EPI_ISL_511031, EPI_ISL_511032, EPI_ISL_511033, EPI_ISL_511034, EPI_ISL_511035, EPI_ISL_511036, EPI_ISL_511037, EPI_ISL_511038, EPI_ISL_511039, EPI_ISL_511040, EPI_ISL_511041, EPI_ISL_511042, EPI_ISL_511043, EPI_ISL_511044, EPI_ISL_511045, EPI_ISL_511046, EPI_ISL_511047, EPI_ISL_511048, EPI_ISL_511049, EPI_ISL_511050, EPI_ISL_511051, EPI_ISL_511052, EPI_ISL_511053, EPI_ISL_511054, EPI_ISL_511055, EPI_ISL_511056, EPI_ISL_511057, EPI_ISL_511058, EPI_ISL_511059, EPI_ISL_511060, EPI_ISL_511061, EPI_ISL_511062, EPI_ISL_511063, EPI_ISL_511064, EPI_ISL_511065, EPI_ISL_511066, EPI_ISL_511067, EPI_ISL_511068, EPI_ISL_511069, EPI_ISL_511070, EPI_ISL_511071, EPI_ISL_511072, EPI_ISL_511073, EPI_ISL_511074, EPI_ISL_511075, EPI_ISL_511076, EPI_ISL_511077, EPI_ISL_511078, EPI_ISL_511079, EPI_ISL_511080, EPI_ISL_511081, EPI_ISL_511082, EPI_ISL_511083, EPI_ISL_511084, EPI_ISL_511085, EPI_ISL_511086, EPI_ISL_511087, EPI_ISL_511088, EPI_ISL_511089, EPI_ISL_511090, EPI_ISL_511091, EPI_ISL_511092, EPI_ISL_511093, EPI_ISL_511094, EPI_ISL_511095, EPI_ISL_511096, EPI_ISL_511097, EPI_ISL_511098, EPI_ISL_511099, EPI_ISL_511100, EPI_ISL_511101, EPI_ISL_511102, EPI_ISL_511103, EPI_ISL_511104, EPI_ISL_511105, EPI_ISL_511106, EPI_ISL_511107, EPI_ISL_511108, EPI_ISL_511109, EPI_ISL_511110, EPI_ISL_511111, EPI_ISL_511112, EPI_ISL_511113, EPI_ISL_511114, EPI_ISL_511115, EPI_ISL_511116, EPI_ISL_511117, EPI_ISL_511118, EPI_ISL_511119, EPI_ISL_511120, EPI_ISL_511121, EPI_ISL_511122, EPI_ISL_511123, EPI_ISL_511124, EPI_ISL_511125, EPI_ISL_511126, EPI_ISL_511127, EPI_ISL_511128, EPI_ISL_511129, EPI_ISL_511130, EPI_ISL_511131, EPI_ISL_511132, EPI_ISL_511133, EPI_ISL_511134, EPI_ISL_511135, EPI_ISL_511136, EPI_ISL_511137, EPI_ISL_511138, EPI_ISL_511139, EPI_ISL_511140, EPI_ISL_511141, EPI_ISL_511142, EPI_ISL_511143, EPI_ISL_511144, EPI_ISL_511145, EPI_ISL_511146, EPI_ISL_511147, EPI_ISL_511148, EPI_ISL_511149, EPI_ISL_511150, EPI_ISL_511151, EPI_ISL_511152, EPI_ISL_511153, EPI_ISL_511154, EPI_ISL_511155, EPI_ISL_511156, EPI_ISL_511157, EPI_ISL_511158, EPI_ISL_511159, EPI_ISL_511160, EPI_ISL_511161, EPI_ISL_511162, EPI_ISL_511163, EPI_ISL_511164, EPI_ISL_511165, EPI_ISL_511166, EPI_ISL_511167, EPI_ISL_511168, EPI_ISL_511169, EPI_ISL_511170, EPI_ISL_511171, EPI_ISL_511172, EPI_ISL_511173, EPI_ISL_511174, EPI_ISL_511175, EPI_ISL_511176, EPI_ISL_511177, EPI_ISL_511178, EPI_ISL_511179, EPI_ISL_511180 | see above                                                                                                                                                                                                                                                                                    | Instituto Nacional de Saude (INSA)                                                                                                                                                                                                                                                                                                                                                                   | Instituto Nacional de Saude (INSA)                                                                                                                                                                                                                                                                                                                                                                                                                                                                                                                                                                                                                                                       | Borges et al |
| EPI_ISL_511224, EPI_ISL_511257, EPI_ISL_511276, EPI_ISL_511281, EPI_ISL_511285, EPI_ISL_511286, EPI_ISL_511288, EPI_ISL_511289, EPI_ISL_511293, EPI_ISL_511299, EPI_ISL_511300, EPI_ISL_511305, EPI_ISL_511308, EPI_ISL_511312, EPI_ISL_511313, EPI_ISL_511315                                                                                                                                                                                                                                                                                                                                                                                                                                                                                                                                                                                                                                                                                                                                                                                                                                                                                                                                                                                                                                                                                                                                                                                                                                                                                                                                                                                                                                                                                                                                                                                                                                                                                                                                                                                                                                                                                                                                                                                                                                                                                                                                                                                                                                                                                                                                                                                                                                                                                                                                                                                                                                                                                                                                                                                                                                                                                                                                                                                                                                                                                                                                                                                                                                                                                                                                                                                                                                                                                                                                                                                                                                                                                                                                                                                                                                                                                                                                                                                                                                                                                                                                                                                                                                 | see above                                                                                                                                                                                                                                                                                    | Instituto Nacional de Saude (INSA) and Instituto Gulbenkian de Ciencia (IGC)                                                                                                                                                                                                                                                                                                                         | Instituto Nacional de Saude (INSA) and Instituto Gulbenkian de Ciencia (IGC)                                                                                                                                                                                                                                                                                                                                                                                                                                                                                                                                                                                                             | Borges et al |
| EPI_ISL_511324, EPI_ISL_511326, EPI_ISL_511364, EPI_ISL_511371, EPI_ISL_511376, EPI_ISL_511383, EPI_ISL_511385, EPI_ISL_511388, EPI_ISL_511408, EPI_ISL_511418, EPI_ISL_511423, EPI_ISL_511424, EPI_ISL_511428, EPI_ISL_511430, EPI_ISL_511435, EPI_ISL_511442, EPI_ISL_511445, EPI_ISL_511452, EPI_ISL_511453, EPI_ISL_511454, EPI_ISL_511457, EPI_ISL_511458, EPI_ISL_511460, EPI_ISL_511477, EPI_ISL_511480, EPI_ISL_511482, EPI_ISL_511483, EPI_ISL_511515, EPI_ISL_511542, EPI_ISL_511543, EPI_ISL_511546, EPI_ISL_511552, EPI_ISL_511556, EPI_ISL_511560, EPI_ISL_511561, EPI_ISL_511562, EPI_ISL_511564, EPI_ISL_511567, EPI_ISL_511569, EPI_ISL_511596, EPI_ISL_511607, EPI_ISL_511608, EPI_ISL_511611, EPI_ISL_511612, EPI_ISL_511613, EPI_ISL_511614, EPI_ISL_511616, EPI_ISL_511617, EPI_ISL_511618, EPI_ISL_511620, EPI_ISL_511621, EPI_ISL_511622, EPI_ISL_511624, EPI_ISL_511625, EPI_ISL_511626, EPI_ISL_511628, EPI_ISL_511629, EPI_ISL_511630, EPI_ISL_511631, EPI_ISL_511632, EPI_ISL_511633, EPI_ISL_511634, EPI_ISL_511636, EPI_ISL_511637, EPI_ISL_511638, EPI_ISL_511640, EPI_ISL_511650, EPI_ISL_511652, EPI_ISL_511655, EPI_ISL_511664, EPI_ISL_511665, EPI_ISL_511677, EPI_ISL_511680, EPI_ISL_511681, EPI_ISL_511682, EPI_ISL_511737, EPI_ISL_511738, EPI_ISL_511739, EPI_ISL_511740, EPI_ISL_511741, EPI_ISL_511743, EPI_ISL_511744, EPI_ISL_511745, EPI_ISL_511746, EPI_ISL_511747, EPI_ISL_511748                                                                                                                                                                                                                                                                                                                                                                                                                                                                                                                                                                                                                                                                                                                                                                                                                                                                                                                                                                                                                                                                                                                                                                                                                                                                                                                                                                                                                                                                                                                                                                                                                                                                                                                                                                                                                                                                                                                                                                                                                                                                                                                                                                                                                                                                                                                                                                                                                                                                                                                                                                                                                                                                                                                                                                                                                                                                                                                                                                                                                                                                 | see above                                                                                                                                                                                                                                                                                    | Instituto Nacional de Saude (INSA)                                                                                                                                                                                                                                                                                                                                                                   | Instituto Nacional de Saude (INSA)                                                                                                                                                                                                                                                                                                                                                                                                                                                                                                                                                                                                                                                       | Borges et al |

|                                                                                                                                                                                                                                |                                                                                                                   |                                                                                        |                                                                                                                                                                                                                                                                                                                                                                                                                                                                                                                                                                                                          |
|--------------------------------------------------------------------------------------------------------------------------------------------------------------------------------------------------------------------------------|-------------------------------------------------------------------------------------------------------------------|----------------------------------------------------------------------------------------|----------------------------------------------------------------------------------------------------------------------------------------------------------------------------------------------------------------------------------------------------------------------------------------------------------------------------------------------------------------------------------------------------------------------------------------------------------------------------------------------------------------------------------------------------------------------------------------------------------|
| EPI_ISL_511753, EPI_ISL_511754, EPI_ISL_511755, EPI_ISL_511756, EPI_ISL_511757, EPI_ISL_511758                                                                                                                                 | Instituto Nacional de Saude (INSA)                                                                                | Instituto Nacional de Saude (INSA) and Instituto Gulbenkian de Ciencia (IGC)           | Borges et al                                                                                                                                                                                                                                                                                                                                                                                                                                                                                                                                                                                             |
| EPI_ISL_523506                                                                                                                                                                                                                 | Dutch COVID-19 response team                                                                                      | Erasmus Medical Center                                                                 | Bas Oude Munnink, David Nieuwenhuijse, Reina Sikkema, Claudia Schapendonk, Irina Chestakova, Anne van der Linden, Theo Bestebroer, Stefan van Nieuwkoop, Mark Pronk, Pascal Lexmond, Corien Swaan, Manon Haverkate, Madelief Mollers, Mart Stein, Sandra Kengne Kamga Mobou, Jeroen van Kampen, Jolanda Voermans, Aura Timen, Corine GeurtsvanKessel, Anнемiek van der Eijk, Richard Molenkamp, Marion Koopmans, on behalf of the Dutch national COVID-19 response team.                                                                                                                                 |
| EPI_ISL_528167, EPI_ISL_528169                                                                                                                                                                                                 | University Hospital Basel, Clinical Virology                                                                      | University Hospital Basel, Clinical Bacteriology                                       | Madlen Stange, Alfredo Mari, Tim Roloff, Helena MB Seth-Smith, Michael Schweitzer, Myrta Brunner, Karoline Leuzinger, Kirstine K. Soegaard, Alexander Gensch, Sarah Tschudin-Sutter, Simon Fuchs, Julia Bielicki, Hans Pargger, Martin Siegemund, Christian Nickel, Roland Bingisser, Michael Osthoff, Stefano Bassetti, Rita Schneider-Sliwa, Manuel Battegay, Hans Hirschi, Adrian Egli                                                                                                                                                                                                                |
| EPI_ISL_534975                                                                                                                                                                                                                 | Oxford Viromics, NDM, University of Oxford; Oxford University Hospitals; Basingstoke and North Hampshire Hospital | COVID-19 Genomics UK (COG-UK) Consortium                                               | Tanya Golubchik, David Bonsall, George Macintyre, Amy Trebes, Mariateresa de Cesare, Catrin Moore, Alex Mobbs, Anita Justice, Robert Shaw, Monique Andersson, Timothy Peto, Emma Wise, Nathan Moore, Jessica Lynch, Nick Cortes, Matilde Mori, Stephen Kidd, David Buck, John Todd, Christophe Fraser                                                                                                                                                                                                                                                                                                    |
| EPI_ISL_539144                                                                                                                                                                                                                 | Leeds Teaching Hospitals NHS Trust and Public Health England, National Infection Service (Leeds laboratory)       | Wellcome Sanger Institute for the COVID-19 Genomics UK (COG-UK) consortium             | Louissa Macfarlane-Smith, Holli Carden, Katherine L. Harper, Antony Hale and Alex Alderton, Roberto Amato, Sonia Goncalves, Ewan Harrison, David K. Jackson, Ian Johnston, Dominic Kwiatkowski, Cordelia Langford, John Sillitoe on behalf of the Wellcome Sanger Institute COVID-19 Surveillance Team                                                                                                                                                                                                                                                                                                   |
| EPI_ISL_542116, EPI_ISL_542245, EPI_ISL_542250, EPI_ISL_542251, EPI_ISL_542255, EPI_ISL_542267, EPI_ISL_542277                                                                                                                 | ASST GOM Niguarda                                                                                                 | Dep. Of Oncology and Hemato-Oncology University of Milan                               | Claudia Alteri, Valeria Cento, Antonio Piralla, Valentino Costabile, Monica Tallarita, Luna Colagrossi, Silvia Renica, Federica Giardina, Federica Novazzi, Stefano Gaiarsa, Elisa Matarazzo, Maria Antonello, Chiara Vismara, Roberto Fumagalli, Oscar Massimiliano Epis, Massimo Puoti, Carlo Federico Perno, Fausto Baldanti                                                                                                                                                                                                                                                                          |
| EPI_ISL_542331                                                                                                                                                                                                                 | San Matteo Hospital Pavia                                                                                         | Dep. Of Oncology and Hemato-Oncology University of Milan                               | Claudia Alteri, Valeria Cento, Antonio Piralla, Valentino Costabile, Monica Tallarita, Luna Colagrossi, Silvia Renica, Federica Giardina, Federica Novazzi, Stefano Gaiarsa, Elisa Matarazzo, Maria Antonello, Chiara Vismara, Roberto Fumagalli, Oscar Massimiliano Epis, Massimo Puoti, Carlo Federico Perno, Fausto Baldanti                                                                                                                                                                                                                                                                          |
| EPI_ISL_544538                                                                                                                                                                                                                 | Houston Methodist Hospital                                                                                        | Houston Methodist Hospital                                                             | S. Wesley Long, Randall J. Olsen, Paul A. Christensen, David W. Bernard, James J. Davis, Maulik Shukla, Marcus Nguyen, Matthew Ojeda Saavedra, Concepcion C. Cantu, Prasanti Yerramilli, Layne Pruitt, Sishir Subedi, Hung-Che Kuo, Heather Hendrickson, Ghazaleh Eskandari, Hoang A. T. Nguyen, J. Hunter Long, Muthiah Kumaraswami, Jule Goike, Daniel Boutz, Jimmy Gollihar, Jason S. McLellan, Chia-Wei Chou, Kamyab Javanmardi, Ilya J. Finkelstein, and James M. Musser                                                                                                                            |
| EPI_ISL_547532                                                                                                                                                                                                                 | Dutch COVID-19 response team                                                                                      | National Institute for Public Health and the Environment (RIVM)                        | Adam Meijer, Harry Vennema, Jeroen Cremer, Sharon van den Brink, Bas van der Veer, AnneMarie van den Brandt, Florian Zwagemaker, Dennis Schmitz, Chantal Reusken, on behalf of the national COVID-19 response team                                                                                                                                                                                                                                                                                                                                                                                       |
| EPI_ISL_574967, EPI_ISL_574968                                                                                                                                                                                                 | Viollier AG                                                                                                       | Department of Biosystems Science and Engineering, ETH Zürich                           | Christian Beisel, Sarah Nadeau, Ivan Topolsky, Pedro Ferreira, Philipp Jablonski, Susana Posada-Céspedes, Tobias Schär, Ina Nissen, Natascha Santacroce, Elodie Burcklen, Christiane Beckmann, Maurice Redondo, Olivier Kobel, Christoph Noppen, Sophie Seidel, Noemie Santamaria de Souza, Niko Beerenwinkel, Tanja Stadler                                                                                                                                                                                                                                                                             |
| EPI_ISL_579239, EPI_ISL_579264                                                                                                                                                                                                 | LabPLUS                                                                                                           | Institute of Environmental Science and Research (ESR)                                  | Xiaoyun Ren, Matt Storey, Nikki Freed, Muhammad Faisal, Jing Wang, Hermes Perez, Anja Werno, Antje van der Linden, Arlo Upton, Chris Mansell, David Hammer, Dragana Drinkovic, Gary McAuliffe, Hana Sofia Andersson, James Ussher, Jill Sherwood, Josh Freeman, Julia Howard, Juliet Elvy, Mary DeAlmeida, Matt Blakiston, Matthew Rogers, Max Bloomfield, Michael Addidle, Michelle Balm, Sally Roberts, Sarah Jefferies, Sharmini Muttaiyah, Susan Morpeth, Susan Taylor, Timothy Blackmore, Vani Sathyendran, Veronica Playle, Virginia Hope, Erasmus Smit, Lauren Jelly, Olin Silander, Joep de Ligt |
| EPI_ISL_579408, EPI_ISL_579409, EPI_ISL_579410, EPI_ISL_579411, EPI_ISL_579412, EPI_ISL_579413, EPI_ISL_579426, EPI_ISL_579496, EPI_ISL_579497, EPI_ISL_579498, EPI_ISL_579502, EPI_ISL_579503, EPI_ISL_579504, EPI_ISL_579505 | see above                                                                                                         | Institute of Environmental Science and Research (ESR)                                  | Xiaoyun Ren, Matt Storey, Nikki Freed, Muhammad Faisal, Jing Wang, Hermes Perez, Anja Werno, Antje van der Linden, Arlo Upton, Chris Mansell, David Hammer, Dragana Drinkovic, Gary McAuliffe, Hana Sofia Andersson, James Ussher, Jill Sherwood, Josh Freeman, Julia Howard, Juliet Elvy, Mary DeAlmeida, Matt Blakiston, Matthew Rogers, Max Bloomfield, Michael Addidle, Michelle Balm, Sally Roberts, Sarah Jefferies, Sharmini Muttaiyah, Susan Morpeth, Susan Taylor, Timothy Blackmore, Vani Sathyendran, Veronica Playle, Virginia Hope, Erasmus Smit, Lauren Jelly, Olin Silander, Joep de Ligt |
| EPI_ISL_604289, EPI_ISL_604891                                                                                                                                                                                                 | Quest Diagnostics                                                                                                 | Quest Diagnostics                                                                      | Rosenthal,S.H., Gerasimova,A., Kagan,R.M., Anderson, B., Grover, D., Livingston, K.E., Hua, M., Liu Y., Shalhout, D.F., Owen, R., Lacbawan, F.                                                                                                                                                                                                                                                                                                                                                                                                                                                           |
| EPI_ISL_631569, EPI_ISL_632070, EPI_ISL_632071                                                                                                                                                                                 | New York Presbyterian Queens                                                                                      | New York City Public Health Laboratory                                                 | Jade Wang, et al.                                                                                                                                                                                                                                                                                                                                                                                                                                                                                                                                                                                        |
| EPI_ISL_635264, EPI_ISL_636461                                                                                                                                                                                                 | Institute of Microbiology and Immunology, Faculty of Medicine, University of Ljubljana                            | Institute of Microbiology and Immunology, Faculty of Medicine, University of Ljubljana | Tomaž Mark Zorec, Samo Zakotnik, Miša Korva, Tatjana Avši - Županc, Mario Poljak                                                                                                                                                                                                                                                                                                                                                                                                                                                                                                                         |
| EPI_ISL_729836, EPI_ISL_729846, EPI_ISL_729847, EPI_ISL_729850                                                                                                                                                                 | Laboratorio Central de Saude Publica do Estado do Rio Grande do Sul (LACEN-RS)                                    | Laboratory of Respiratory Viruses and Measles, Oswaldo Cruz Institute, FIOCRUZ         | Paola Resende, Luciana Appolinario, Fernando Motta, Anna Carolina Paixão, Ana Carolina Mendonça, Tatiana Schaffer Gregianini, Marilda Tereza Mar da Rosa, Marilda Siqueira                                                                                                                                                                                                                                                                                                                                                                                                                               |

We gratefully acknowledge the following Authors from the Originating laboratories responsible for obtaining the specimens, as well as the Submitting laboratories where the genome data were generated and shared via GISAID, on which this research is based.

All Submitters of data may be contacted directly via [www.gisaid.org](http://www.gisaid.org)

| Accession ID                                                                                                                                   | Originating Laboratory                                                                                                                                                | Submitting Laboratory                                                                                                                                                                                                                                                                                                                                                       | Authors                                                                                                                                                                                                                                                                                                                                                                                                                                                                                                                                                                                  |
|------------------------------------------------------------------------------------------------------------------------------------------------|-----------------------------------------------------------------------------------------------------------------------------------------------------------------------|-----------------------------------------------------------------------------------------------------------------------------------------------------------------------------------------------------------------------------------------------------------------------------------------------------------------------------------------------------------------------------|------------------------------------------------------------------------------------------------------------------------------------------------------------------------------------------------------------------------------------------------------------------------------------------------------------------------------------------------------------------------------------------------------------------------------------------------------------------------------------------------------------------------------------------------------------------------------------------|
| EPI_ISL_639819                                                                                                                                 | unknown                                                                                                                                                               | Public Health Virology Laboratory, Forensic and Scientific Services (PHV-FSS)                                                                                                                                                                                                                                                                                               | Son Nguyen et al.                                                                                                                                                                                                                                                                                                                                                                                                                                                                                                                                                                        |
| EPI_ISL_640023                                                                                                                                 | Oudshoorn Hospital wc OUD                                                                                                                                             | NHLS/UCT                                                                                                                                                                                                                                                                                                                                                                    | Arash Iranzadeh, Deelan Doolabh, Lynn Tyers, Bruna Galvao, Innocent Mudau, Marvin Hsiao, Kruger Marais, Diana Hardie, Stephen Korsman, Carolyn Williamson                                                                                                                                                                                                                                                                                                                                                                                                                                |
| EPI_ISL_640135                                                                                                                                 | Groote Schuur Hospital wc GSH                                                                                                                                         | NHLS/UCT                                                                                                                                                                                                                                                                                                                                                                    | Arash Iranzadeh, Deelan Doolabh, Lynn Tyers, Bruna Galvao, Innocent Mudau, Marvin Hsiao, Kruger Marais, Diana Hardie, Stephen Korsman, Carolyn Williamson                                                                                                                                                                                                                                                                                                                                                                                                                                |
| EPI_ISL_641059                                                                                                                                 | Microbiological Diagnostic Unit - Public Health Laboratory (MDU-PHL)                                                                                                  | MDU-PHL                                                                                                                                                                                                                                                                                                                                                                     | Seemann T., Schultz M.B., Sait, M.L., Sherry, N.L.                                                                                                                                                                                                                                                                                                                                                                                                                                                                                                                                       |
| EPI_ISL_644218                                                                                                                                 | CEPHR / Vincent's Hospital                                                                                                                                            | Irish Coronavirus Sequencing Consortium - National Virus Reference Laboratory                                                                                                                                                                                                                                                                                               | Michael Carr, Gabriel Gonzalez, Alejandro Abner Garcia Leon, Patrick Mallon                                                                                                                                                                                                                                                                                                                                                                                                                                                                                                              |
| EPI_ISL_644769, EPI_ISL_644777, EPI_ISL_644780                                                                                                 | National Microbiology Reference Laboratory                                                                                                                            | Quadram Institute Bioscience                                                                                                                                                                                                                                                                                                                                                | Thanh Le Viet, Andrew J. Page, Justin O'Grady, Gemma Kay, David Baker, Gaetan Thilliez, Ana-Victoria Gutierrez, Robert Kingsley, Leonardo de Oliveira Martins, Sekesai Zinyowera, Tatenda Takawira, Muchaneta Mugabe, Gibson Mhlanga, Portia Manangazira, Andrew Tarupiwa, Hlanai Gumbo, Agnes Juru, Charles Nyagupe, Alexander Goredema, Isaac Phiri, Barbra Murwira, Beuty Makamure, Tapfumaneni Mashe                                                                                                                                                                                 |
| EPI_ISL_707738                                                                                                                                 | Department of Clinical Microbiology                                                                                                                                   | GIGA Medical Genomics                                                                                                                                                                                                                                                                                                                                                       | Keith Durkin, Maria Artesi, Sébastien Bontems, Raphaël Boreux, Bouchra Boujemla, Cécile Meex, Pierrette Melin, Marie-Pierre Hayette, Vincent Bours                                                                                                                                                                                                                                                                                                                                                                                                                                       |
| EPI_ISL_707793                                                                                                                                 | 1-Laboratory of Microbiology, National Reference Lab, Charles Nicolle Hospital; 2-University of Tunis ElManar, Faculty of Medicine of Tunis, LR99ES09, Tunis, Tunisia | 1-Clinical and Experimental Pharmacology Lab, LR16SP02, National Center of Pharmacovigilance, University of Tunis El Manar, Tunis, Tunisia.<br>2-Neurodegenerative diseases and psychiatric troubles, LR18SP03, Razi Hospital, University of Tunis El Manar, Tunis, Tunisia. 3- Ministry of Health, National Observatory of New and Emerging Diseases, 1006, Tunis, Tunisia | Ilhem Boutiba-Ben Boubaker, Sameh Trabelsi, Nissaf Ben Alaya, Maher Kharrat, Alia Ben Kahla, Jalila Ben Khellil, Salma Abid, Sana Ferjani, Mouna Ben Sassi, Mouna Safer, Awatef El Moussi, Habiba Ben Romdhane, Souissi Amira, Ines Mdiri, Hanen El Jebari, Asma Ferjani, Gaies Emna, Riadh Daghfous, Riadh Gouider.                                                                                                                                                                                                                                                                     |
| EPI_ISL_707807                                                                                                                                 | Middlemore Hospital                                                                                                                                                   | Institute of Environmental Science and Research (ESR)                                                                                                                                                                                                                                                                                                                       | Xiaoyun Ren, Matt Storey, Nikki Freed, Muhammad Faisal, Jing Wang, Hermes Perez, Anja Werno, Antje van der Linden, Arlo Upton, Chris Mansell, David Hammer, Dragana Drinkovic, Gary McAuliffe, Hana Sofia Andersson, James Ussher, Jill Sherwood, Josh Freeman, Julia Howard, Juliet Ely, Mary DeAlmeida, Matt Blakiston, Matthew Rogers, Max Bloomfield, Michael Addidle, Michelle Balm, Sally Roberts, Sarah Jefferies, Sharmini Muttaiyah, Susan Morpeth, Susan Taylor, Timothy Blackmore, Vani Sathyendran, Veronica Playle, Virginia Hope, Lauren Jelly, Olin Silander, Joep de Lig |
| EPI_ISL_708046                                                                                                                                 | Unilabs Laboratory Medicine                                                                                                                                           | Norwegian Institute of Public Health, Department of Virology                                                                                                                                                                                                                                                                                                                | Kathrine Stene-Johansen, Kamilla Heddeland Instefjord, Hilde Elshaug, Marie Paulsen Madsen, Rasmus Riis Kopperud, Hilde Vollan, Karoline Bragstad, Olav Hungnes                                                                                                                                                                                                                                                                                                                                                                                                                          |
| EPI_ISL_708054                                                                                                                                 | Oslo University Hospital, Department of Medical Microbiology                                                                                                          | Norwegian Institute of Public Health, Department of Virology                                                                                                                                                                                                                                                                                                                | Kathrine Stene-Johansen, Kamilla Heddeland Instefjord, Hilde Elshaug, Marie Paulsen Madsen, Rasmus Riis Kopperud, Hilde Vollan, Karoline Bragstad, Olav Hungnes                                                                                                                                                                                                                                                                                                                                                                                                                          |
| EPI_ISL_708146                                                                                                                                 | Department of Medical Microbiology, St. Olavs hospital                                                                                                                | Norwegian Institute of Public Health, Department of Virology                                                                                                                                                                                                                                                                                                                | Kathrine Stene-Johansen, Kamilla Heddeland Instefjord, Hilde Elshaug, Marie Paulsen Madsen, Rasmus Riis Kopperud, Hilde Vollan, Karoline Bragstad, Olav Hungnes                                                                                                                                                                                                                                                                                                                                                                                                                          |
| EPI_ISL_708192                                                                                                                                 | Pamukkale University Hospital                                                                                                                                         | Pamukkale University Department of Medical Genetics                                                                                                                                                                                                                                                                                                                         | Onur TOKGUN et al.                                                                                                                                                                                                                                                                                                                                                                                                                                                                                                                                                                       |
| EPI_ISL_708454                                                                                                                                 | Department of Clinical Microbiology                                                                                                                                   | GIGA Medical Genomics                                                                                                                                                                                                                                                                                                                                                       | Keith Durkin, Maria Artesi, Sébastien Bontems, Raphaël Boreux, Bouchra Boujemla, Cécile Meex, Pierrette Melin, Marie-Pierre Hayette, Vincent Bours                                                                                                                                                                                                                                                                                                                                                                                                                                       |
| EPI_ISL_708508, EPI_ISL_708517, EPI_ISL_708523                                                                                                 | National Virus Reference Laboratory                                                                                                                                   | Irish Coronavirus Sequencing Consortium - Teagasc Oakpark                                                                                                                                                                                                                                                                                                                   | Michele Della Bartola, Matthew McCabe, Ewen Mullins                                                                                                                                                                                                                                                                                                                                                                                                                                                                                                                                      |
| EPI_ISL_708619                                                                                                                                 | Texas Department of State Health Services                                                                                                                             | Texas Department of State Health Services                                                                                                                                                                                                                                                                                                                                   | Rashmi Tuladhar, Bonnie Oh, Jenny Zhang, Maliha Rahman, Anita Pokharel, Myong Koag, Chung Wang, Rachel Lee, Grace Kubin, Mayela Pedrueza, James Daniel Bonser                                                                                                                                                                                                                                                                                                                                                                                                                            |
| EPI_ISL_708740, EPI_ISL_708746                                                                                                                 | PathWest Laboratory Medicine WA                                                                                                                                       | PathWest Laboratory Medicine WA Microbial Surveillance Unit                                                                                                                                                                                                                                                                                                                 | PathWest Laboratory Medicine WA Microbial Surveillance Unit                                                                                                                                                                                                                                                                                                                                                                                                                                                                                                                              |
| EPI_ISL_708819                                                                                                                                 | Urban Institute for Disease Prevention and Control                                                                                                                    | National Institute of Health, Department of Medical Sciences, Ministry of Public Health, Thailand                                                                                                                                                                                                                                                                           | Pilailuk Okada; Siripaporn Phuygun; Thanutsapa Thanadachakul; Sittiporn Pammen; Pakorn Piromtong; Warawan Wongboot; Sunthareeya Waicharoen; Malinee Chittaganpitch                                                                                                                                                                                                                                                                                                                                                                                                                       |
| EPI_ISL_710221                                                                                                                                 | Colorado Department of Public Health and Environment                                                                                                                  | Colorado Department of Public Health and Environment                                                                                                                                                                                                                                                                                                                        | Laura Bankers, Molly C. Hetherington-Rauth, Shannon Ely, Shannon R. Matzinger, Sarah Elizabeth Totten, Emily A. Travanty                                                                                                                                                                                                                                                                                                                                                                                                                                                                 |
| EPI_ISL_710396                                                                                                                                 | Texas Department of State Health Services                                                                                                                             | Texas Department of State Health Services                                                                                                                                                                                                                                                                                                                                   | Rashmi Tuladhar, Bonnie Oh, Jenny Zhang, Maliha Rahman, Anita Pokharel, Myong Koag, Chung Wang, Rachel Lee, Grace Kubin, Mayela Pedrueza, James Daniel Bonser                                                                                                                                                                                                                                                                                                                                                                                                                            |
| EPI_ISL_710423                                                                                                                                 | Los Angeles County PHL                                                                                                                                                | Los Angeles County PHL                                                                                                                                                                                                                                                                                                                                                      | P. Hemarajata et al.                                                                                                                                                                                                                                                                                                                                                                                                                                                                                                                                                                     |
| EPI_ISL_710490                                                                                                                                 | Virology (microbiology), Hospital Universitario Central de Asturias                                                                                                   | Virology (microbiology), Hospital Universitario Central de Asturias                                                                                                                                                                                                                                                                                                         | Castello,C., Gomez-deOna,J., Martin-Rodriguez,G., Abreu,F., Costales,I., Boga,J.A., Coto,E., Rojo,S., Alvarez-Argueelles,M.E., Perez-Martinez,Z., Sandoval,M., Melon,S.                                                                                                                                                                                                                                                                                                                                                                                                                  |
| EPI_ISL_710524                                                                                                                                 | Respiratory Virus Unit, National Infection Service, Public Health England                                                                                             | COVID-19 Genomics UK (COG-UK) Consortium                                                                                                                                                                                                                                                                                                                                    | PHE Covid Sequencing Team                                                                                                                                                                                                                                                                                                                                                                                                                                                                                                                                                                |
| EPI_ISL_710574                                                                                                                                 | University Hospital Dubrava                                                                                                                                           | Ruer Bošković Institute; Forensic Science Centre Ivan Vueti; University of Zagreb Faculty of Science                                                                                                                                                                                                                                                                        | Robert Beluži, Marina Korolija, Ana Livun, Vjekoslav Tomai, Dunja Glavaš, Maja Kuzman, Paula Štancil, Lucija Markulin, Lucija Basi, Antonela Blažeković, Fran Boroveki, Lidija Cvetko-Krajinovi, Ivana elap, Fuad osovi, Mirjana Domazet-Lošo, Tomislav Domazet-Lošo, Valentina umljan-Combaj, Kristina Gotovac Jereti, Jasna Kašman, Vladimir Krajinovi, Danilo Licastro, Boris Maek, Željka Maak Šafranko, Gordana Maravi Vlahoviek, Senica Pejša, Josipa Skelin, Ivan Šamija, Mario Štefanovi, Sanja Tadinac, Katarina Marija Tupek, Petra Vrabcac, Rosa Karli, Kristian Vlahoviek    |
| EPI_ISL_710576                                                                                                                                 | VC Sorgenfrottagningen                                                                                                                                                | The Public Health Agency of Sweden                                                                                                                                                                                                                                                                                                                                          | Department of Microbiology, The Public Health Agency of Sweden                                                                                                                                                                                                                                                                                                                                                                                                                                                                                                                           |
| EPI_ISL_711767, EPI_ISL_712506, EPI_ISL_712880, EPI_ISL_713225, EPI_ISL_713494, EPI_ISL_713681, EPI_ISL_713896, EPI_ISL_714786, EPI_ISL_714880 | Department of Virus and Microbiological Special Diagnostics, Statens Serum Institut, Copenhagen, Denmark                                                              | Albertsen Lab, Department of Chemistry and Bioscience, Aalborg University, Denmark                                                                                                                                                                                                                                                                                          | Danish Covid-19 Genome Consortium                                                                                                                                                                                                                                                                                                                                                                                                                                                                                                                                                        |
| EPI_ISL_717602                                                                                                                                 | Lab voor klinische biologie                                                                                                                                           | Onderzoeksgroep Virologie                                                                                                                                                                                                                                                                                                                                                   | Nick Vereecke, Laurens Lambrechts, Marthe Pauwels, Bruno Verhasselt, Linos Vandekerckhove, Hans Nauwynck, Sebastiaan Theuns                                                                                                                                                                                                                                                                                                                                                                                                                                                              |

|                                                                |                                                                                                                                                                                                                     |                                                                                                                                |                                                                                                                                                                                                                                                                                                                                                                                                                                                                                                 |
|----------------------------------------------------------------|---------------------------------------------------------------------------------------------------------------------------------------------------------------------------------------------------------------------|--------------------------------------------------------------------------------------------------------------------------------|-------------------------------------------------------------------------------------------------------------------------------------------------------------------------------------------------------------------------------------------------------------------------------------------------------------------------------------------------------------------------------------------------------------------------------------------------------------------------------------------------|
| EPI_ISL_717606                                                 | Lab voor klinische biologie                                                                                                                                                                                         | Onderzoeksgroep Virologie                                                                                                      | Laurens Lambrechts, Nick Vereecke, Marthe Pauwels, Bruno Verhasselt, Linos Vandekerckhove, Hans Nauwynck, Sebastiaan Theuns                                                                                                                                                                                                                                                                                                                                                                     |
| EPI_ISL_717749                                                 | Kingston Health Sciences Centre and Queen's University                                                                                                                                                              | Ontario Institute for Cancer Research                                                                                          | Prameet M. Sheth, Calvin Sjaarda, Robert Colautti, Katya Douchant, Ilinca Lungu, Bernard Lam, Paul Krzyzanowski, Michael Laszloffy, Lawrence E. Heisler, Richard de Borja, Jared T. Simpson                                                                                                                                                                                                                                                                                                     |
| EPI_ISL_717800                                                 | LACEN RJ - Noel Nutels                                                                                                                                                                                              | Bioinformatics Laboratory / LNCC                                                                                               | Carolina M Voloch, Ronaldo da Silva F Jr, Luiz G P de Almeida, Cynthia C Cardoso, Otavio Bustrolini, Alexandra L Gerber, Ana Paula de C Guimarães, Diana Mariani, Andréa Cony Cavalcanti, Claudia dos Santos Rodrigues, Terezinha M P P Castañeira, Amílcar Tanuri, Ana Tereza R de Vasconcelos                                                                                                                                                                                                 |
| EPI_ISL_717824, EPI_ISL_717920, EPI_ISL_717930, EPI_ISL_717960 | Laboratório de Virologia Molecular / UFRJ                                                                                                                                                                           | Bioinformatics Laboratory / LNCC                                                                                               | Carolina M Voloch, Ronaldo da Silva F Jr, Luiz G P de Almeida, Cynthia C Cardoso, Otavio Bustrolini, Alexandra L Gerber, Ana Paula de C Guimarães, Diana Mariani, Andréa Cony Cavalcanti, Claudia dos Santos Rodrigues, Terezinha M P P Castañeira, Amílcar Tanuri, Ana Tereza R de Vasconcelos                                                                                                                                                                                                 |
| EPI_ISL_717968                                                 | Molecular diagnostic laboratory of Federal Budget Institution of Science "Central Research Institute of Epidemiology" of The Federal Service on Customers' Rights Protection and Human Well-being Surveillance      | Group of Genomics and Postgenomic Technologies of Central Research Institute of Epidemiology                                   | Samoilov AE, Kaptelova VV, Dudorova AV, Korneenko EV, Speranskaya AS, Tivanova EV, Shipulina OY, Akimkin VG                                                                                                                                                                                                                                                                                                                                                                                     |
| EPI_ISL_718240                                                 | Hospital                                                                                                                                                                                                            | National Reference Center for Viruses of Respiratory Infections, Institut Pasteur, Paris                                       | Marion Barbet, Sylvie Behillil, Méline Bizard, Angela Brisebarre, Camille Capel, Etienne Simon-Lorière, Vincent Enouf, Maud Vanpeene, Sylvie van der Werf, Gisèle Lagathu                                                                                                                                                                                                                                                                                                                       |
| EPI_ISL_718259                                                 | Institute of Virology, Biomedical Research Center of the Slovak Academy of Sciences, Bratislava                                                                                                                     | Faculty of Natural Sciences, Comenius University, Bratislava                                                                   | Broa Břejová, Viktória Hodorová, Kristína Bořšová, Viktória abanová, Sabina Fumaová Havlíková, Juraj Kopáek, Martina Liková, ubomira Lukáiková, Martina Neboháová, Monika Sláviková, Tomáš Vlna, Jozef Nosek, Boris Klempa                                                                                                                                                                                                                                                                      |
| EPI_ISL_718269, EPI_ISL_718286, EPI_ISL_718310                 | Institute for Medical Research, Infectious Disease Research Centre, National Institutes of Health, Ministry of Health Malaysia                                                                                      | Institute for Medical Research, Infectious Disease Research Centre, National Institutes of Health, Ministry of Health Malaysia | Suppiah J, Kamel K, Mohd-Zawawi Z, Thayan R                                                                                                                                                                                                                                                                                                                                                                                                                                                     |
| EPI_ISL_720576                                                 | Lighthouse Lab in Milton Keynes                                                                                                                                                                                     | Wellcome Sanger Institute for the COVID-19 Genomics UK (COG-UK) Consortium                                                     | The Lighthouse Lab in Milton Keynes and Alex Alderton, Roberto Amato, Sonia Goncalves, Ewan Harrison, David K. Jackson, Ian Johnston, Dominic Kwiatkowski, Cordelia Langford, John Sillitoe on behalf of the Wellcome Sanger Institute COVID-19 Surveillance Team                                                                                                                                                                                                                               |
| EPI_ISL_721620                                                 | Pathogen Genomics Center, National Institute of Infectious Diseases                                                                                                                                                 | Pathogen Genomics Center, National Institute of Infectious Diseases                                                            | Tsuyoshi Sekizuka, Kentaro Itokawa, Rina Tanaka, Masanori Hashino, Makoto Kuroda                                                                                                                                                                                                                                                                                                                                                                                                                |
| EPI_ISL_721760                                                 | Viollier AG                                                                                                                                                                                                         | Department of Biosystems Science and Engineering, ETH Zürich                                                                   | Christian Beisel                                                                                                                                                                                                                                                                                                                                                                                                                                                                                |
| EPI_ISL_722039, EPI_ISL_722093                                 | Hospital das Clínicas Universidade de São Paulo Medical School                                                                                                                                                      | Laboratório de Parasitologia Médica - Instituto de Medicina Tropical - Universidade de São Paulo                               | Brazil-UK Centre for Arbovirus Discovery Diagnosis Genomics and Epidemiology (CADDE) Genomic Network - Instituto de Medicina Tropical                                                                                                                                                                                                                                                                                                                                                           |
| EPI_ISL_722145, EPI_ISL_722148, EPI_ISL_722151, EPI_ISL_722164 | DB Diagnosticos do Brasil                                                                                                                                                                                           | Laboratório de Parasitologia Médica - Instituto de Medicina Tropical - Universidade de São Paulo                               | Brazil-UK Centre for Arbovirus Discovery Diagnosis Genomics and Epidemiology (CADDE) Genomic Network - Instituto de Medicina Tropical                                                                                                                                                                                                                                                                                                                                                           |
| EPI_ISL_722235                                                 | Servicio de Microbiologia. Hospital General Universitario de Castellón                                                                                                                                              | SeqCOVID-SPAIN consortium/IBV(CSIC)                                                                                            | Rosario Moreno Muñoz, María Dolores Tirado Balaguer and SeqCOVID-SPAIN consortium                                                                                                                                                                                                                                                                                                                                                                                                               |
| EPI_ISL_722864                                                 | I.R.C.C.S. "S. De Bellis" - Ente Ospedaliero                                                                                                                                                                        | Istituto Zooprofilattico Sperimentale della Puglia e della Basilicata                                                          | Parisi A., Bianco A., Capozzi L., Del Sambio L., Lippolis A., Notarnicola M., Manzulli V, Rondonone V., Pace L.                                                                                                                                                                                                                                                                                                                                                                                 |
| EPI_ISL_723084                                                 | Institute of Medical Genetics and Applied Genomics                                                                                                                                                                  | Institute of Medical Genetics and Applied Genomics                                                                             | Caspar Gross, Tina Ganzenmüller, Siri Göpel, Michaela Pogoda, Daniela Bezdán, Michael Sonnabend, Angel Angelov, Nicolas Casadei, Stephan Ossowski, Thomas Iftner, Michael Bitzer                                                                                                                                                                                                                                                                                                                |
| EPI_ISL_723347                                                 | Dutch COVID-19 response team                                                                                                                                                                                        | National Institute for Public Health and the Environment (RIVM)                                                                | Adam Meijer, Harry Vennema, Jeroen Cremer, Sharon van den Brink, Bas van der Veer, AnneMarie van den Brandt, Florian Zwagemaker, Dennis Schmitz, Chantal Reusken, on behalf of the national COVID-19 response team                                                                                                                                                                                                                                                                              |
| EPI_ISL_723572                                                 | Northumbria University / South Tees Hospitals NHS Foundation Trust / North Cumbria Integrated Care NHS Foundation Trust / North Tees and Hartlepool NHS Foundation Trust / Newcastle Hospitals NHS Foundation Trust | COVID-19 Genomics UK (COG-UK) Consortium                                                                                       | Darren L Smith, Andrew Nelson, Matthew Bashton, Greg R Young, Joshua Loh, John Allan, Mohammad A Tariq, Giles S Holt, Gary Black, Wen C Yew, Lynn Dover, Paul Baker, Steve Liggett, Sarah Essex, Jane Greenaway, Debra Padgett, Clive Graham, Garren Scott, Edward Barton, Emma Swindells, Brendan Payne, Jennifer Collins, Yusri Taha, Gary Eltringham                                                                                                                                         |
| EPI_ISL_724830                                                 | Oxford Viromics, NDM, University of Oxford; Oxford University Hospitals; Basingstoke and North Hampshire Hospital                                                                                                   | COVID-19 Genomics UK (COG-UK) Consortium                                                                                       | Tanya Golubchik, David Bonsall, George Macintyre, Amy Trebes, Mariateresa de Cesare, Catrin Moore, Alex Mobbs, Anita Justice, Robert Shaw, Monique Andersson, Timothy Peto, Emma Wise, Nathan Moore, Jessica Lynch, Nick Cortes, Matilde Mori, Stephen Kidd, David Buck, John Todd, Christophe Fraser                                                                                                                                                                                           |
| EPI_ISL_728196                                                 | National Public Health Laboratory, National Centre for Infectious Diseases                                                                                                                                          | National Public Health Laboratory, National Centre for Infectious Diseases                                                     | Tze Minn Mak, Sophie Octavia, Zhenyang Zhou, Lin Cui, Raymond Tzer Pin Lin                                                                                                                                                                                                                                                                                                                                                                                                                      |
| EPI_ISL_728303                                                 | Jena University Hospital, Institute for Infectious Diseases and Infection Control                                                                                                                                   | Institute of infectious medicine & hospital hygiene, CaSe-Group                                                                | Spott, Riccardo; Marquet, Mike; Pletz, Matthias W.; Brandt, Christian                                                                                                                                                                                                                                                                                                                                                                                                                           |
| EPI_ISL_728352, EPI_ISL_728367                                 | Laboratoire Biolife                                                                                                                                                                                                 | Laboratoire de Biotechnologie                                                                                                  | Mouna Ouadghiri, Tarik Aanniz, Mohammed Walid Chemaou Elifhiri, Mohamed Chenaoui, Hanae Dakka, Afaf Alaoui, Otmane Touzani, Bouchra Belfquih, Lahcen belyamani, Saaïd Amzazi and Azeddine Ibrahim                                                                                                                                                                                                                                                                                               |
| EPI_ISL_728560                                                 | Institute for Urban Disease Control and Prevention                                                                                                                                                                  | COVID-19 Network Investigations (CONI) Alliance                                                                                | Kamolthip Atsawawanunt, Elizabeth Batty, Wasun Chantratita, Thanat Chookajorn, Stefan Fernandez, Angkana Huang, Anthony R. Jones, Khajohn Joonsalak, Chonticha Klungtong, Theerarat Kochakorn, Prayuth Kaewmalang, Amornmas Kongklieng, Namfon Kotanan, Krittikorn Kumpornsin, Wudtichai Manasatienkij, Anek Mungaomklang, Bhakbhoom Panthan, Pukkaporn Parnwijitkul, Ekawat Pasomsub, Kingkan Rakmanee, Insee Semsorn, Janjira Thaipadungpanit, Arporn Wangwiwatsin, Treewat Watthanachockchai |
| EPI_ISL_728760                                                 | Dutch COVID-19 response team                                                                                                                                                                                        | National Institute for Public Health and the Environment (RIVM)                                                                | Adam Meijer, Harry Vennema, Jeroen Cremer, Sharon van den Brink, Bas van der Veer, AnneMarie van den Brandt, Florian Zwagemaker, Dennis Schmitz, Chantal Reusken, on behalf of the national COVID-19 response team                                                                                                                                                                                                                                                                              |
| EPI_ISL_728836                                                 | Viollier AG                                                                                                                                                                                                         | Department of Biosystems Science and Engineering, ETH Zürich                                                                   | Chaoran Chen, Sarah Nadeau, Catharine Aquino, Ivan Topolsky, Pedro Ferreira, Philipp Jablonski, Susana Posada-Céspedes, Andreia Cabral de Gouvea, Maria Domenica Moccia, Simon Grüter, Timothy Sykes, Lennart Opitz, Ralph Schlapbach, Christiane Beckmann, Maurice Redondo, Olivier Kobel, Christoph Noppen, Sophie Seidel, Noemie Santamaria de Souza, Niko Beerwinkel, Tanja Stadler                                                                                                         |
| EPI_ISL_729341, EPI_ISL_729381                                 | A. Krumbholz, Labor Dr. Krause und Kollegen MVZ GmbH, Kiel                                                                                                                                                          | Charité Universitätsmedizin Berlin, Institut für Virologie                                                                     | Victor M Corman, Barbara Mühlemann, Jörn Beheim-Schwarzbach, Talitha Veith, Julia Schneider, Terry Jones, Christian Drosten                                                                                                                                                                                                                                                                                                                                                                     |
| EPI_ISL_729415                                                 | Charité Universitätsmedizin Berlin, Institut für Virologie/Labor Berlin                                                                                                                                             | Charité Universitätsmedizin Berlin, Institut für Virologie                                                                     | Victor M Corman, Barbara Mühlemann, Jörn Beheim-Schwarzbach, Talitha Veith, Julia Schneider, Terry Jones, Christian Drosten                                                                                                                                                                                                                                                                                                                                                                     |
| EPI_ISL_729542                                                 | A. Krumbholz, Labor Dr. Krause und Kollegen MVZ GmbH, Kiel                                                                                                                                                          | Charité Universitätsmedizin Berlin, Institut für Virologie                                                                     | Victor M Corman, Barbara Mühlemann, Jörn Beheim-Schwarzbach, Talitha Veith, Julia Schneider, Terry Jones, Christian Drosten                                                                                                                                                                                                                                                                                                                                                                     |
| EPI_ISL_729925, EPI_ISL_729942                                 | Nigeria Centre for Disease Control (NCDC)                                                                                                                                                                           | African Centre of Excellence for Genomics of Infectious Diseases (ACEGID), Redeemer's University, Ede, Osun State, Nigeria     | Oluniyi P.E. et al                                                                                                                                                                                                                                                                                                                                                                                                                                                                              |

We gratefully acknowledge the following Authors from the Originating laboratories responsible for obtaining the specimens, as well as the Submitting laboratories where the genome data were generated and shared via GISAID, on which this research is based.

All Submitters of data may be contacted directly via [www.gisaid.org](http://www.gisaid.org)

| Accession ID                                                                   | Originating Laboratory                                                                                                                                                                                         | Submitting Laboratory                                                                                                      | Authors                                                                                                                                                                                                                                                                                                                                                                                                                                                |
|--------------------------------------------------------------------------------|----------------------------------------------------------------------------------------------------------------------------------------------------------------------------------------------------------------|----------------------------------------------------------------------------------------------------------------------------|--------------------------------------------------------------------------------------------------------------------------------------------------------------------------------------------------------------------------------------------------------------------------------------------------------------------------------------------------------------------------------------------------------------------------------------------------------|
| EPI_ISL_639819                                                                 | unknown                                                                                                                                                                                                        | Public Health Virology Laboratory, Forensic and Scientific Services (PHV-FSS)                                              | Son Nguyen et al.                                                                                                                                                                                                                                                                                                                                                                                                                                      |
| EPI_ISL_640023                                                                 | Oudshoorn Hospital wv OUD                                                                                                                                                                                      | NHLS/UCT                                                                                                                   | Arash Iranzadeh, Deelan Doolabh, Lynn Tyers, Bruna Galvao, Innocent Mudau, Marvin Hsiao, Kruger Marais, Diana Hardie, Stephen Korsman, Carolyn Williamson                                                                                                                                                                                                                                                                                              |
| EPI_ISL_640135                                                                 | Groote Schuur Hospital wv GSH                                                                                                                                                                                  | NHLS/UCT                                                                                                                   | Arash Iranzadeh, Deelan Doolabh, Lynn Tyers, Bruna Galvao, Innocent Mudau, Marvin Hsiao, Kruger Marais, Diana Hardie, Stephen Korsman, Carolyn Williamson                                                                                                                                                                                                                                                                                              |
| EPI_ISL_641059                                                                 | Microbiological Diagnostic Unit - Public Health Laboratory (MDU-PHL)                                                                                                                                           | MDU-PHL                                                                                                                    | Seemann T., Schultz M.B., Sait, M.L., Sherry, N.L.                                                                                                                                                                                                                                                                                                                                                                                                     |
| EPI_ISL_644218                                                                 | CEPHR / Vincent's Hospital                                                                                                                                                                                     | Irish Coronavirus Sequencing Consortium - National Virus Reference Laboratory                                              | Michael Carr, Gabriel Gonzalez, Alejandro Abner Garcia Leon, Patrick Mallon                                                                                                                                                                                                                                                                                                                                                                            |
| EPI_ISL_644769, EPI_ISL_644777, EPI_ISL_644780                                 | National Microbiology Reference Laboratory                                                                                                                                                                     | Quadram Institute Bioscience                                                                                               | Thanh Le Viet, Andrew J. Page, Justin O'Grady, Gemma Kay, David Baker, Gaetan Thilliez, Ana-Victoria Gutierrez, Robert Kingsley, Leonardo de Oliveira Martins, Sekesai Zinyowera, Tatenda Takawira, Muchaneta Mugabe, Gibson Mhlanga, Portia Manangazira, Andrew Tarupiwa, Hlanai Gumbo, Agnes Juru, Charles Nyagupe, Alexander Goredema, Isaac Phiri, Barbra Murwira, Beuty Makamure, Tapfumane Mashe                                                 |
| EPI_ISL_729969, EPI_ISL_730036, EPI_ISL_730044                                 | Nigeria Centre for Disease Control (NCDC)                                                                                                                                                                      | African Centre of Excellence for Genomics of Infectious Diseases (ACEGID), Redeemer's University, Ede, Osun State, Nigeria | Oluniyi P.E. et al                                                                                                                                                                                                                                                                                                                                                                                                                                     |
| EPI_ISL_730107                                                                 | San Diego County Public Health Laboratory                                                                                                                                                                      | Andersen lab at Scripps Research                                                                                           | SEARCH Alliance San Diego with Tracy Basler, Jovan Shephard, Brett Austin                                                                                                                                                                                                                                                                                                                                                                              |
| EPI_ISL_730220                                                                 | Genomica Lab Molecular, M@xico                                                                                                                                                                                 | Andersen lab at Scripps Research                                                                                           | SEARCH Alliance San Diego with Jonathan Gonzalez Garcia, Jose Roman Chavez Mendez, Jose Horacio Reyna Verdugo, Martin Gonzalez Ibarra, Luis Alberto Rangel Gonzalez                                                                                                                                                                                                                                                                                    |
| EPI_ISL_730341                                                                 | San Diego County Public Health Laboratory                                                                                                                                                                      | Andersen lab at Scripps Research                                                                                           | SEARCH Alliance San Diego with Tracy Basler, Jovan Shephard, Brett Austin                                                                                                                                                                                                                                                                                                                                                                              |
| EPI_ISL_730576                                                                 | Gazi University Faculty of Medicine, Medical Virology Laboratory                                                                                                                                               | Gazi University Faculty of Medicine, Medical Virology Laboratory                                                           | Erdem ahin, Gülendem Bozday, Hager Muftah, Selin Yiit, Shaknoza Sarzhanova, Özlem Güzel Tunçcan, Murat Dizbay, Il Fidan, Kayhan Çalar                                                                                                                                                                                                                                                                                                                  |
| EPI_ISL_731430                                                                 | Lighthouse Lab in Alderley Park                                                                                                                                                                                | Wellcome Sanger Institute for the COVID-19 Genomics UK (COG-UK) Consortium                                                 | Jacquelyn Wynn, Mairead Hyland, The Lighthouse Lab in Alderley Park and Alex Alderton, Roberto Amato, Sonia Goncalves, Ewan Harrison, David K. Jackson, Ian Johnston, Dominic Kwiatkowski, Cordelia Langford, John Sillitoe on behalf of the Wellcome Sanger Institute COVID-19 Surveillance Team                                                                                                                                                      |
| EPI_ISL_731896, EPI_ISL_731946                                                 | Instituto Nacional de Saude (INSA)                                                                                                                                                                             | Instituto Nacional de Saude (INSA)                                                                                         | Borges et al                                                                                                                                                                                                                                                                                                                                                                                                                                           |
| EPI_ISL_732567                                                                 | Department of Virology and Immunology, University of Helsinki and Helsinki University Hospital, Huslab Finland                                                                                                 | Department of Virology, Faculty of Medicine, University of Helsinki, Helsinki, Finland                                     | Teemu Smura, Ravi Kant, Phuoc Truong, Hussein Alburkat, Hannimari Kallio-Kokko, Jenni Virtanen, Maija Suvanto, Sari Hannula, Harri Kangas, Pekka Ellonen, Olli Vapalahti                                                                                                                                                                                                                                                                               |
| EPI_ISL_732658                                                                 | Bundeswehr Institute of Microbiology                                                                                                                                                                           | Bundeswehr Institute of Microbiology                                                                                       | Elham Khatamzas, Markus Antwerpen, Mathias Walter, Alexandra Rehn, Sabine Zange, Enrico Georgi, Michael von Bergwelt-Baildon, Roman Wölfel                                                                                                                                                                                                                                                                                                             |
| EPI_ISL_732668                                                                 | Molecular diagnostic laboratory of Federal Budget Institution of Science "Central Research Institute of Epidemiology" of The Federal Service on Customers' Rights Protection and Human Well-being Surveillance | Group of Genomics and Postgenomic Technologies of Central Research Institute of Epidemiology                               | Samoilov AE, Kaptelova VV, Dudorova AV, Korneenko EV, Saenko SS, Speranskaya AS, Tivanova EV, Shipulina OY, Akimkin VG                                                                                                                                                                                                                                                                                                                                 |
| EPI_ISL_732785                                                                 | Centro de Investigación Biomédica de La Rioja - Hospital San Pedro Logroño                                                                                                                                     | SeqCOVID-SPAIN consortium/IBV(CSIC)                                                                                        | Maria de Toro, José Manuel Azcona Gutiérrez, María Pilar Bea Escudero, Miriam Blasco Alberdi and SeqCOVID-SPAIN consortium                                                                                                                                                                                                                                                                                                                             |
| EPI_ISL_732858, EPI_ISL_732867                                                 | genXone SA, Molecular Diagnostics Laboratory / NZOZ                                                                                                                                                            | genXone SA, Research & Development Laboratory                                                                              | Maciej Sykulski, Grzegorz Nowicki, Monika Makowska-Woniak, Jakub Grabowski, Natalia Drwska-Matelska, ukasz Krych, Micha Kaszuba                                                                                                                                                                                                                                                                                                                        |
| EPI_ISL_733188, EPI_ISL_733220                                                 | Pathogenic Microorganisms Variability Laboratory                                                                                                                                                               | WHO National Influenza Centre Russian Federation                                                                           | Andrey Komissarov, Artem Fadeev, Anna Ivanova, Kseniya Komissarova, Dmitry Bazhenov, Daria Danilenko, Ksenia Safina, Elena Nabieva, Georgii Bazykin, Nadezhda Kuznetsova, Elena Shidlovskaya, Sergey Alkhovsky, Tatyana Vishnevskaya, Elizaveta Divisenko, Alexey Shchetinin, Maria Nikiforova, Andrey Pochtovyy, Evgeny Usachev, Elena Vokalova, Maxim Rubalsky, Oleg Rubalsky, Artem Tkachuk, Vladimir Gushchin, Alexander Gintsburg, Dmitry Lioznov |
| EPI_ISL_733227                                                                 | UMMC-Health                                                                                                                                                                                                    | WHO National Influenza Centre Russian Federation                                                                           | Andrey Komissarov, Artem Fadeev, Anna Ivanova, Kseniya Komissarova, Dmitry Bazhenov, Tatiana Platonova, Daria Danilenko, Ksenia Safina, Elena Nabieva, Georgii Bazykin, Dmitry Lioznov                                                                                                                                                                                                                                                                 |
| EPI_ISL_733258, EPI_ISL_733268                                                 | WHO National Influenza Centre Russian Federation                                                                                                                                                               | WHO National Influenza Centre Russian Federation                                                                           | Andrey Komissarov, Artem Fadeev, Anna Ivanova, Kseniya Komissarova, Dmitry Bazhenov, Daria Danilenko, Ksenia Safina, Elena Nabieva, Georgii Bazykin, Dmitry Lioznov                                                                                                                                                                                                                                                                                    |
| EPI_ISL_733326, EPI_ISL_733355                                                 | HELIX LLC                                                                                                                                                                                                      | WHO National Influenza Centre Russian Federation                                                                           | Andrey Komissarov, Artem Fadeev, Anna Ivanova, Kseniya Komissarova, Dmitry Bazhenov, Daria Danilenko, Ksenia Safina, Elena Nabieva, Georgii Bazykin, Dmitry Lioznov                                                                                                                                                                                                                                                                                    |
| EPI_ISL_733410                                                                 | UMMC-Health                                                                                                                                                                                                    | WHO National Influenza Centre Russian Federation                                                                           | Andrey Komissarov, Artem Fadeev, Anna Ivanova, Kseniya Komissarova, Dmitry Bazhenov, Tatiana Platonova, Daria Danilenko, Ksenia Safina, Elena Nabieva, Georgii Bazykin, Dmitry Lioznov                                                                                                                                                                                                                                                                 |
| EPI_ISL_733425, EPI_ISL_733431                                                 | HELIX LLC                                                                                                                                                                                                      | WHO National Influenza Centre Russian Federation                                                                           | Andrey Komissarov, Artem Fadeev, Anna Ivanova, Kseniya Komissarova, Dmitry Bazhenov, Daria Danilenko, Ksenia Safina, Elena Nabieva, Georgii Bazykin, Dmitry Lioznov                                                                                                                                                                                                                                                                                    |
| EPI_ISL_733483, EPI_ISL_733488                                                 | Omsk Research Institute of Natural Focal Infections                                                                                                                                                            | WHO National Influenza Centre Russian Federation                                                                           | Andrey Komissarov, Artem Fadeev, Anna Ivanova, Kseniya Komissarova, Dmitry Bazhenov, Daria Danilenko, Ekaterina Gradoboeva, Elena Poleshchuk, Aleksei Vasilenko, Valery Yakimenko, Ksenia Safina, Elena Nabieva, Georgii Bazykin, Dmitry Lioznov                                                                                                                                                                                                       |
| EPI_ISL_733495                                                                 | WHO National Influenza Centre Russian Federation                                                                                                                                                               | WHO National Influenza Centre Russian Federation                                                                           | Andrey Komissarov, Artem Fadeev, Anna Ivanova, Kseniya Komissarova, Dmitry Bazhenov, Daria Danilenko, Ksenia Safina, Elena Nabieva, Georgii Bazykin, Dmitry Lioznov                                                                                                                                                                                                                                                                                    |
| EPI_ISL_734137                                                                 | Lighthouse Lab in Glasgow                                                                                                                                                                                      | Wellcome Sanger Institute for the COVID-19 Genomics UK (COG-UK) Consortium                                                 | Harper VanSteenhouse, Yumi Kasai, David Gray, Carol Clugston, Anna Dominiczak and Alex Alderton, Roberto Amato, Sonia Goncalves, Ewan Harrison, David K. Jackson, Ian Johnston, Dominic Kwiatkowski, Cordelia Langford, John Sillitoe on behalf of the Wellcome Sanger Institute COVID-19 Surveillance Team                                                                                                                                            |
| EPI_ISL_734531, EPI_ISL_734734, EPI_ISL_734907, EPI_ISL_735244, EPI_ISL_735248 | UZ Leuven, National Reference Laboratory for Coronaviruses, Laboratory Medicine, Leuven, Belgium                                                                                                               | KU Leuven, Rega Institute, Clinical and Epidemiological Virology                                                           | Tony Wawina-Bokalanga, Joan Marti-Carerras, Bert Vanmechelen, Piet Maes                                                                                                                                                                                                                                                                                                                                                                                |



|                                                                                                |                                                                                                                                                                                                                |                                                                                                                                        |                                                                                                                                                                                                                                                                                                                                                                                                                                                                          |
|------------------------------------------------------------------------------------------------|----------------------------------------------------------------------------------------------------------------------------------------------------------------------------------------------------------------|----------------------------------------------------------------------------------------------------------------------------------------|--------------------------------------------------------------------------------------------------------------------------------------------------------------------------------------------------------------------------------------------------------------------------------------------------------------------------------------------------------------------------------------------------------------------------------------------------------------------------|
| EPI_ISL_735264, EPI_ISL_735282, EPI_ISL_735336, EPI_ISL_735356                                 | Genomic Laboratory (GLAB) (Conjoint lab of Health Directorate of Istanbul and Istanbul Technical University)                                                                                                   | Genomic Laboratory (GLAB), Istanbul Technical University                                                                               | Ilker Karacan, Tugba Kizilboga Akgun, Nihat Bugra Agaoglu, Payam Zolfagharian, Mehtap Aydin, Gizem Alkurt, Jale Yildiz, Betsi Kose, Nisan Denizce Can, Ayse Serra Ozel, Nilsum Altunak, Arzu Irvem, Yasemin Kendir Demirkol, Ozlem Akgun Dogan, Levent Doganay, Gizem Dinler Doganay                                                                                                                                                                                     |
| EPI_ISL_735918, EPI_ISL_736520, EPI_ISL_736656                                                 | Lighthouse Lab in Alderley Park                                                                                                                                                                                | Wellcome Sanger Institute for the COVID-19 Genomics UK (COG-UK) Consortium                                                             | Jacquelyn Wynn, Mairead Hyland, The Lighthouse Lab in Alderley Park and Alex Alderton, Roberto Amato, Sonia Goncalves, Ewan Harrison, David K. Jackson, Ian Johnston, Dominic Kwiatkowski, Cordelia Langford, John Sillitoe on behalf of the Wellcome Sanger Institute COVID-19 Surveillance Team                                                                                                                                                                        |
| EPI_ISL_736908                                                                                 | Pathogen Genomics Center, National Institute of Infectious Diseases                                                                                                                                            | Pathogen Genomics Center, National Institute of Infectious Diseases                                                                    | Tsuyoshi Sekizuka, Kentaro Itokawa, Rina Tanaka, Masanori Hashino, Makoto Kuroda                                                                                                                                                                                                                                                                                                                                                                                         |
| EPI_ISL_736926, EPI_ISL_736984                                                                 | NHLS-IALCH                                                                                                                                                                                                     | KRISP, KZN Research Innovation and Sequencing Platform                                                                                 | Giandhari J, Pillay S, Lessells R, ChimukangaraB, Mdlaleo K, York D, Khan S, Tegally H, Wilkinson E, de Oliveira T                                                                                                                                                                                                                                                                                                                                                       |
| EPI_ISL_737026                                                                                 | The National Institute of Public Health                                                                                                                                                                        | State Veterinary Institute Prague                                                                                                      | Nagy,A;Jirincova,H;Trnka,D;Vecerova,J                                                                                                                                                                                                                                                                                                                                                                                                                                    |
| EPI_ISL_737035, EPI_ISL_737071                                                                 | Department of Virology and Immunology, University of Helsinki and Helsinki University Hospital, Huslab Finland                                                                                                 | Department of Virology, Faculty of Medicine, University of Helsinki, Helsinki, Finland                                                 | Teemu Smura, Ravi Kant, Phuoc Truong, Hussein Alburkat, Hannimari Kallio-Kokko, Jenni Virtanen, Maija Suvanto, Sari Hannula, Harri Kangas, Pekka Ellonen, Olli Vapalahti                                                                                                                                                                                                                                                                                                 |
| EPI_ISL_737660                                                                                 | Viollier AG                                                                                                                                                                                                    | Department of Biosystems Science and Engineering, ETH Zürich                                                                           | Chaoran Chen, Sarah Nadeau, Catharine Aquino, Ivan Topolsky, Philipp Jablonski, Lara Fuhrmann, David Dreifuss, Katharina Jahn, Andreia Cabral de Gouvea, Maria Domenica Moccia, Simon Grüter, Timothy Sykes, Lennart Opitz, Griffin White, Laura Neff, Doris Popovic, Andrea Patrignani, Jay Tracy, Ralph Schlapbach, Christiane Beckmann, Maurice Redondo, Olivier Kobel, Christoph Noppen, Sophie Seidel, Noemie Santamaria de Souza, Niko Beerenwinkel, Tanja Stadler |
| EPI_ISL_737704                                                                                 | Viollier AG                                                                                                                                                                                                    | Department of Biosystems Science and Engineering, ETH Zürich                                                                           | Chaoran Chen, Sarah Nadeau, Ivan Topolsky, Emmanouil Demitziakis, Keith Harshman, Ioannis Xenarios, Henri Pegeot, Lorenzo Cerutti, Deborah Penet, Philipp Jablonski, Lara Fuhrmann, David Dreifuss, Katharina Jahn, Christiane Beckmann, Maurice Redondo, Olivier Kobel, Christoph Noppen, Sophie Seidel, Noemie Santamaria de Souza, Niko Beerenwinkel, Tanja Stadler                                                                                                   |
| EPI_ISL_738219                                                                                 | UZ Leuven, National Reference Laboratory for Coronaviruses, Laboratory Medicine, Leuven, Belgium                                                                                                               | KU Leuven, Rega Institute, Clinical and Epidemiological Virology                                                                       | Tony Wawina-Bokalanga, Joan Marti-Carerras, Bert Vanmechelen, Piet Maes                                                                                                                                                                                                                                                                                                                                                                                                  |
| EPI_ISL_738294                                                                                 | Yale Pathology Lab                                                                                                                                                                                             | Grubaugh Lab - Yale School of Public Health                                                                                            | Joseph Fauver, Tara Alpert, Chantal Vogels, Mary Petrone, Isabel Ott, Ellen Foxman, Shaili Gupta, Danielle Plank, Nathan Grubaugh                                                                                                                                                                                                                                                                                                                                        |
| EPI_ISL_738468, EPI_ISL_738474, EPI_ISL_738479, EPI_ISL_738493                                 | UZ Leuven, National Reference Laboratory for Coronaviruses, Laboratory Medicine, Leuven, Belgium                                                                                                               | KU Leuven, Rega Institute, Clinical and Epidemiological Virology                                                                       | Tony Wawina-Bokalanga, Joan Marti-Carerras, Bert Vanmechelen, Piet Maes                                                                                                                                                                                                                                                                                                                                                                                                  |
| EPI_ISL_738840                                                                                 | Orange County Public Health Lab                                                                                                                                                                                | Chan-Zuckerberg Biohub                                                                                                                 | CZB Cliahub Consortium                                                                                                                                                                                                                                                                                                                                                                                                                                                   |
| EPI_ISL_739029, EPI_ISL_739201, EPI_ISL_739434, EPI_ISL_739463, EPI_ISL_739470                 | Alameda County Public Health Lab                                                                                                                                                                               | Chan-Zuckerberg Biohub                                                                                                                 | CZB Cliahub Consortium                                                                                                                                                                                                                                                                                                                                                                                                                                                   |
| EPI_ISL_739657                                                                                 | Santa Clara County Public Health Laboratory                                                                                                                                                                    | Chan-Zuckerberg Biohub                                                                                                                 | CZB Cliahub Consortium                                                                                                                                                                                                                                                                                                                                                                                                                                                   |
| EPI_ISL_740861                                                                                 | BCCDC Public Health Laboratory                                                                                                                                                                                 | BCCDC Public Health Laboratory                                                                                                         | Prystajecy Natalie, Linda Hoang, Dan Fornika, Shannon Russell, Kim Macdonald, Kimia Kamelian, John Tyson, Inna Sekirov, Mel Krajden                                                                                                                                                                                                                                                                                                                                      |
| EPI_ISL_740894                                                                                 | Sydney South West Pathology Service (SSWPS) - Royal Prince Alfred Hospital - NSW Health Pathology                                                                                                              | NSW Health Pathology - Institute of Clinical Pathology and Medical Research; Westmead Hospital; University of Sydney                   | CIDM-PH et al.                                                                                                                                                                                                                                                                                                                                                                                                                                                           |
| EPI_ISL_741690                                                                                 | Centre for Enzyme Innovation, University of Portsmouth / Translational Research Laboratory, Portsmouth Hospitals NHS Trust                                                                                     | COVID-19 Genomics UK (COG-UK) Consortium                                                                                               | Angela Beckett,Yann Bourgeois,Garry Scarlett,Sharon Glaysher,Scott Elliott,Kelly Bicknell,Robert Impey,Alyson Lloyd,Sarah Wylie,Ethan Butcher,Anoop Chauhan,Samuel Robson                                                                                                                                                                                                                                                                                                |
| EPI_ISL_744368                                                                                 | Laboratoire national de santé, Microbiology, Virology                                                                                                                                                          | Laboratoire national de santé, Microbiology, Microbial Genomics Platform                                                               | Anke Wienecke-Baldacchino, Catherine Ragimbeau,Jessica Tapp, Fatu Djabi, Lise Pignon, Raoul Salmon, Tamir Abdelrahman                                                                                                                                                                                                                                                                                                                                                    |
| EPI_ISL_744586                                                                                 | Laboratoire national de santé, Microbiology, Virology                                                                                                                                                          | Laboratoire national de santé, Microbiology, Microbial Genomics Platform                                                               | Anke Wienecke-Baldacchino, Catherine Ragimbeau, Tamir Abdelrahman, Jessica Tapp, Fatu Djabi                                                                                                                                                                                                                                                                                                                                                                              |
| EPI_ISL_744971                                                                                 | Laboratoire national de santé, Microbiology, Virology                                                                                                                                                          | Laboratoire national de santé, Microbiology, Microbial Genomics Platform                                                               | Anke Wienecke-Baldacchino, Catherine Ragimbeau,Jessica Tapp, Fatu Djabi, Lise Pignon, Raoul Salmon, Tamir Abdelrahman                                                                                                                                                                                                                                                                                                                                                    |
| EPI_ISL_745033                                                                                 | West Java Health Laboratory                                                                                                                                                                                    | West Java Health Laboratory                                                                                                            | Azzania Fibriani, Ema Rahmawati, Ryan Bayusantika Ristandi, Rifky Waluyajati Rachman, Cut Nur Cinthia Alamanda, Isak Solihin, Rini Robiani, Miftahul Faridi, Karimatu Khoirunnisa                                                                                                                                                                                                                                                                                        |
| EPI_ISL_745041, EPI_ISL_745075                                                                 | Israel Central Virology laboratory                                                                                                                                                                             | Israel Central Virology laboratory                                                                                                     | Neta Zuckerman, Efrat Dahan Bucris, Oran Erster, Michal Mandelboim, Orna Mor, Ella Mendelson                                                                                                                                                                                                                                                                                                                                                                             |
| EPI_ISL_745212, EPI_ISL_745217                                                                 | Lab voor klinische biologie                                                                                                                                                                                    | Onderzoeksgroep Virologie                                                                                                              | Nick Vereecke, Laurens Lambrechts, Marthe Pauwels, Bruno Verhasselt, Linos Vandekerckhove, Hans Nauwynck, Sebastiaan Theuns                                                                                                                                                                                                                                                                                                                                              |
| EPI_ISL_745258                                                                                 | Molecular diagnostic laboratory of Federal Budget Institution of Science "Central Research Institute of Epidemiology" of The Federal Service on Customers' Rights Protection and Human Well-being Surveillance | Group of Genomics and Postgenomic Technologies of Central Research Institute of Epidemiology                                           | Samoilov AE, Kaptelova VV, Korneenko EV, Dudorova AV, Saenko SS, Speranskaya AS, Tivanova EV, Shipulina OY, Akimkin VG                                                                                                                                                                                                                                                                                                                                                   |
| EPI_ISL_746308                                                                                 | Ginkgo Bioworks Clinical Laboratory                                                                                                                                                                            | Utah Public Health Laboratory                                                                                                          | Erin L. Young, Kelly Oakeson, Tara Gallagher, Michael T. Pyne, E. Susan Slechta, Melanie A. Mallory, Jeffrey B. Stevenson, Salika M. Shakir, David R. Hillyard, Malaika McKenzie-Bennett, James McGann, Jim Griffin, Keith Robison, Alex Plocik, Becky Schilling, Martha Pierson, Rebecca Littlefield, Michelle Spencer, Birgitte Simen                                                                                                                                  |
| EPI_ISL_746577, EPI_ISL_746757, EPI_ISL_746781, EPI_ISL_746799, EPI_ISL_746816                 | Genetica Molecular and Subdepartamento de Virologia ISP Chile                                                                                                                                                  | Instituto de Salud Publica de Chile                                                                                                    | Javier Tognarelli, Barbara Parra, Loredana Arata, Jaime Lagos, Gisselle Barra, Patricia Bustos, Rodrigo Fasce, Andres Castillo, Jorge Fernandez                                                                                                                                                                                                                                                                                                                          |
| EPI_ISL_747033                                                                                 | Respiratory Viruses Branch, Centers for Disease Control and Prevention                                                                                                                                         | Respiratory Viruses Branch, Centers for Disease Control and Prevention                                                                 | Queen,K., Li,Y., Tao,Y., Uehara,A., Montmayeur,A., Paden,C.R., Cook,P.W., Marine,R., Sheth,M., Wang,H., Lee,J., Tong,S.                                                                                                                                                                                                                                                                                                                                                  |
| EPI_ISL_747200                                                                                 | UW Virology Lab                                                                                                                                                                                                | UW Virology Lab                                                                                                                        | Pavitra Roychoudhury, Hong Xie, Lasata Shrestha, Michelle Lin, Meei-Li Huang, Keith R Jerome, Alexander Greninger                                                                                                                                                                                                                                                                                                                                                        |
| EPI_ISL_747341, EPI_ISL_747421                                                                 | Division of Emerging Infectious Diseases, Bureau of Infectious Diseases Diagnosis Control, Korea Disease Control and Prevention Agency                                                                         | Division of Emerging Infectious Diseases, Bureau of Infectious Diseases Diagnosis Control, Korea Disease Control and Prevention Agency | Ae Kyung Park, Il-Hwan Kim, Heui Man Kim, Jeong-Min Kim, Namjoo Lee, Chaeyoung Lee, Sang Hee Woo, Eun-Jin Kim                                                                                                                                                                                                                                                                                                                                                            |
| EPI_ISL_748682, EPI_ISL_748761, EPI_ISL_748861, EPI_ISL_749758, EPI_ISL_751075, EPI_ISL_751175 | Department of Virus and Microbiological Special Diagnostics, Statens Serum Institut, Copenhagen, Denmark                                                                                                       | Albertsen Lab, Department of Chemistry and Bioscience, Aalborg University, Denmark                                                     | Danish Covid-19 Genome Consortium                                                                                                                                                                                                                                                                                                                                                                                                                                        |
| EPI_ISL_751212                                                                                 | Pathogen Genomics Lab King Abdullah University of Science and Technology(KAUST)                                                                                                                                | Pathogen Genomics Lab King Abdullah University of Science and Technology(KAUST)                                                        | Sharif Hala, Sara Mfarrej, Raushan Nugmanova, Olga Douvropoulou, Rahul P Salunke, Raecee Naeem, Fadwa Alofi, Asim Khogeer, Afrah Alsomali, Jumana Taha, Abdulaziz Alahmadi, Kahled Alghithami, Anwar Hashem, Naif Almontashiri, Arnab Pain                                                                                                                                                                                                                               |
| EPI_ISL_751222                                                                                 | Pathogen Genomics Lab King Abdullah University of Science and Technology(KAUST)                                                                                                                                | Pathogen Genomics Lab King Abdullah University of Science and Technology(KAUST)                                                        | Raecee Naeem, Sara Mfarrej, Sharif Hala, Olga Douvropoulou, Raushan Nugmanova, Awad Al-Omari, Samer Salih, Abbas Al Mutair, Arnab Pain                                                                                                                                                                                                                                                                                                                                   |
| EPI_ISL_751283                                                                                 | Devki Devi Foundation, a unit of Max Healthcare                                                                                                                                                                | CSIR-IGIB/Max                                                                                                                          | Rajesh Pandey#, Samreen Siddiqui, Janani Srinivasa Vasudevan, Akshay Kanan, Ranjeet Maurya, Uzma Shamim, Bansidhar Tarai, Akansha Tyagi, Mitali Mukerji, Poonam Das, Sujeet Jha, Mohammed Faruq, Anurag Agrawal                                                                                                                                                                                                                                                          |
| EPI_ISL_751337, EPI_ISL_751399, EPI_ISL_751412                                                 | IRCCS Sacro Cuore Don Calabria Hospital, Department                                                                                                                                                            | University of Verona, Department of Biotechnology                                                                                      | Antonio Mori, Michela Deiana, Elena Pomari, Chiara Piubelli; Giulia Lopatriello, Luca Marcolungo, Cristina Beltrami, Chiara Degli Esposti, Emanuela                                                                                                                                                                                                                                                                                                                      |

|                                                |                                                                                                |                                                                                    |                                                                                                                                                                                                                                                                                                                                                                                                                                                                                                                                                                                                          |
|------------------------------------------------|------------------------------------------------------------------------------------------------|------------------------------------------------------------------------------------|----------------------------------------------------------------------------------------------------------------------------------------------------------------------------------------------------------------------------------------------------------------------------------------------------------------------------------------------------------------------------------------------------------------------------------------------------------------------------------------------------------------------------------------------------------------------------------------------------------|
| EPI_ISL_752599                                 | of Infectious, Tropical Diseases & Microbiology<br>SA Pathology                                | SA Pathology                                                                       | Cosentino, Massimo Delledonne                                                                                                                                                                                                                                                                                                                                                                                                                                                                                                                                                                            |
| EPI_ISL_752613, EPI_ISL_752635                 | State Laboratories Division, Hawaii State Department of Health                                 | State Laboratories Division, Hawaii State Department of Health                     | Lex Leong, Julien Soubrier, Chuan Kok Lim, Song Gao, Mark Turra, Karin Kassahn, Ivan Bastian, Geoff Higgins<br>Pamela O'Brien, Sabrina Diemert, Drew Kuwazaki, Razvan Sultana, Edward Desmond                                                                                                                                                                                                                                                                                                                                                                                                            |
| EPI_ISL_753967, EPI_ISL_754014, EPI_ISL_754054 | Charité Universitätsmedizin Berlin, Institut für Virologie/Labor Berlin                        | Charité Universitätsmedizin Berlin, Institut für Virologie                         | Victor M Corman, Jörn Beheim-Schwarzbach, Barbara Mühlemann, Julia Schneider, Talitha Veith, Terry Jones, Christian Drosten                                                                                                                                                                                                                                                                                                                                                                                                                                                                              |
| EPI_ISL_754067                                 | Kathmandu University                                                                           | Nepal Health Research Council                                                      | Pradip Gyanwali, Meghnath Dhimal                                                                                                                                                                                                                                                                                                                                                                                                                                                                                                                                                                         |
| EPI_ISL_754098                                 | National Public Health Laboratory, National Centre for Infectious Diseases                     | National Public Health Laboratory, National Centre for Infectious Diseases         | Tze Minn Mak, Sophie Octavia, Zhenyang Zhou, Lin Cui, Raymond Tzer Pin Lin                                                                                                                                                                                                                                                                                                                                                                                                                                                                                                                               |
| EPI_ISL_754871                                 | Innovative Genomics Institute, UC Berkeley                                                     | Innovative Genomics Institute, UC Berkeley                                         | Stacia Wyman, Haridha Shivram, Phil Frankino, Liana Lareau, Shana McDevitt, Justin Choi                                                                                                                                                                                                                                                                                                                                                                                                                                                                                                                  |
| EPI_ISL_755303                                 | Laboratorio de Bioingeniería, Instituto de Ciencias de la Ingeniería, Universidad de O'Higgins | Center for Mathematical Modeling and Center for Genome Regulation, Santiago, Chile | M. Latorre, G. Galvez, J. Ortega, Bastias M, Sanhueza D, Travisany D, Allende ML, Maass A, González M, Bustos F, Arriagada G, Montecino, M, Orellana A, Castro E, Meneses C.                                                                                                                                                                                                                                                                                                                                                                                                                             |
| EPI_ISL_755565                                 | Maine Health and Environmental Testing Laboratory                                              | Tewhey Lab, The Jackson Laboratory                                                 | Matluk,N., Dewey,H., Iosue,F., Barter,M., Lynch,R., Munger,H. and Tewhey,R.                                                                                                                                                                                                                                                                                                                                                                                                                                                                                                                              |
| EPI_ISL_755619                                 | Canterbury Health Laboratories                                                                 | Institute of Environmental Science and Research (ESR)                              | Xiaoyun Ren, Matt Storey, Nikki Freed, Muhammad Faisal, Jing Wang, Hermes Perez, Anja Werno, Antje van der Linden, Arlo Upton, Chris Mansell, David Hammer, Dragana Drinkovic, Gary McAuliffe, Hana Sofia Andersson, James Ussher, Jill Sherwood, Josh Freeman, Julia Howard, Juliet Elvy, Mary DeAlmeida, Matt Blakiston, Matthew Rogers, Max Bloomfield, Michael Addidle, Michelle Balm, Sally Roberts, Sarah Jefferies, Sharmini Muttaiyah, Susan Morpeth, Susan Taylor, Timothy Blackmore, Vani Sathyendran, Veronica Playle, Virginia Hope, Erasmus Smit, Lauren Jelly, Olin Silander, Joep de Ligt |
| EPI_ISL_755651                                 | Instituto Adolfo Lutz - Central                                                                | Instituto Adolfo Lutz, Interdisciplinary Procedures Center, Strategic Laboratory   | Claudio Tavares Sacchi, Claudia Regina Gonçalves, Erica Valessa Ramos Gomes, Karoline Rodrigues Campos                                                                                                                                                                                                                                                                                                                                                                                                                                                                                                   |

We gratefully acknowledge the following Authors from the Originating laboratories responsible for obtaining the specimens, as well as the Submitting laboratories where the genome data were generated and shared via GISAID, on which this research is based.

All Submitters of data may be contacted directly via [www.gisaid.org](http://www.gisaid.org)

| Accession ID                                                                   | Originating Laboratory                                                                                                                                                                                                          | Submitting Laboratory                                                                                 | Authors                                                                                                                                                                                                                                                                                                                                                                                                                                                                                                                                                             |
|--------------------------------------------------------------------------------|---------------------------------------------------------------------------------------------------------------------------------------------------------------------------------------------------------------------------------|-------------------------------------------------------------------------------------------------------|---------------------------------------------------------------------------------------------------------------------------------------------------------------------------------------------------------------------------------------------------------------------------------------------------------------------------------------------------------------------------------------------------------------------------------------------------------------------------------------------------------------------------------------------------------------------|
| EPI_ISL_464719, EPI_ISL_464774                                                 | Respiratory Virus Unit, Microbiology Services Colindale, Public Health England                                                                                                                                                  | Respiratory Virus Unit, Microbiology Services Colindale, Public Health England                        | PHE Covid Sequencing Team                                                                                                                                                                                                                                                                                                                                                                                                                                                                                                                                           |
| EPI_ISL_468153                                                                 | [Romania, Bucharest] National Institute for Infectious Diseases "Prof. Dr. Matei Bal"                                                                                                                                           | [Romania, Bucharest] National Institute for Infectious Diseases "Prof. Dr. Matei Bal"                 | Leontina Banica, Marius Cotic, Corina Casangiu, Marius Surleac, Simona Paraschiv                                                                                                                                                                                                                                                                                                                                                                                                                                                                                    |
| EPI_ISL_468290                                                                 | Viollier AG                                                                                                                                                                                                                     | Department of Biosystems Science and Engineering, ETH Zürich                                          | Christian Beisel, Sarah Nadeau, Ivan Topolsky, Pedro Ferreira, Philipp Jablonski, Susana Posada-Céspedes, Tobias Schär, Ina Nissen, Natascha Santacroce, Elodie Burcklen, Christiane Beckmann, Maurice Redondo, Olivier Kobel, Christoph Noppen, Sophie Seidel, Noemie Santamaria de Souza, Niko Beerenwinkel, Tanja Stadler                                                                                                                                                                                                                                        |
| EPI_ISL_468754                                                                 | Laboratorio de Biología Molecular, Facultad de Medicina, Universidad de Atacama                                                                                                                                                 | Center for Mathematical Modeling and Center for Genome Regulation, Santiago, Chile                    | Gaeta A, Travisany D, Palma R, Urta C, Varas M, Allende ML, Maass A, González M, C Echeverría                                                                                                                                                                                                                                                                                                                                                                                                                                                                       |
| EPI_ISL_468950                                                                 | Servicio de Microbiología. Hospital Universitario Donostia. OSI Donostialdea. Área de Enfermedades Infecciosas, Grupo de Infección Respiratoria y Resistencia Antimicrobiana. Instituto de Investigación Sanitaria Biodonostia. | SeqCOVID-SPAIN consortium/IBV(CSIC)                                                                   | Gustavo Cilla, Milagrosa Montes, Luis Piñeiro, Jose Maria Marimón and SeqCOVID-SPAIN consortium                                                                                                                                                                                                                                                                                                                                                                                                                                                                     |
| EPI_ISL_470304                                                                 | Department of Pathology, University of Cambridge                                                                                                                                                                                | Wellcome Sanger Institute for the COVID-19 Genomics UK (COG-UK) consortium                            | Luke W Meredith, M. Estée Török, Myra Hosmito, William L. Hamilton, Martin D. Curran, Theresa Feltwell, Grant Hall, Anna Yakovleva, Fahad A Khokhar, Charlotte J. Houldcroft, Laura G Caller, Aminu S. Jahun, Sarah L. Caddy, Ian Goodfellow; and Alex Alderton, Roberto Amato, Sonia Goncalves, Ewan Harrison, David K. Jackson, Ian Johnston, Dominic Kwiatkowski, Cordelia Langford, John Sillitoe on behalf of the Wellcome Sanger Institute COVID-19 Surveillance Team ( <a href="http://www.sanger.ac.uk/covid-team">http://www.sanger.ac.uk/covid-team</a> ) |
| EPI_ISL_470734                                                                 | Utah Public Health Laboratory                                                                                                                                                                                                   | Utah Public Health Laboratory                                                                         | Heidi Butz, Erin Young, Kelly Oakeson                                                                                                                                                                                                                                                                                                                                                                                                                                                                                                                               |
| EPI_ISL_470900                                                                 | Influenza etiology and epidemiology laboratory                                                                                                                                                                                  | Pathogenic Microorganisms Variability Laboratory                                                      | Alexey Shchetinin, Maria Nikiforova, Elena Shidlovskaya, Nadezhda Kuznetsova, Vladimir Gushchin, Inna Dolzhikova, Daria Grousova, Andrey Botikov, Denis Logunov, Kirill Krasnoslobotsev, Svetlana Trushakova, Elena Burtseva, Ludmila Kolobukhina, Svetlana Smetanina, Alexander Gintsburg                                                                                                                                                                                                                                                                          |
| EPI_ISL_471159                                                                 | MRCG at LSHTM Genomics lab                                                                                                                                                                                                      | MRCG at LSHTM Genomics lab                                                                            | Sesay et al                                                                                                                                                                                                                                                                                                                                                                                                                                                                                                                                                         |
| EPI_ISL_475016                                                                 | Israel Central Virology laboratory                                                                                                                                                                                              | Israel Central Virology laboratory                                                                    | Neta Zuckerman, Efrat Dahan Bucris, Oran Erster, Ella Mendelson, Michal Mandelboim                                                                                                                                                                                                                                                                                                                                                                                                                                                                                  |
| EPI_ISL_475094                                                                 | Halmstad klinisk mikrobiologi                                                                                                                                                                                                   | The Public Health Agency of Sweden                                                                    | Oskar Karlsson Lindsjo, Maria Lind Karlberg, Mattias Haukland, Reza Advani, Olov Svartstrom, Anna-Malin Linde, Sandra Broddesson, Petra Edquist, Shamam Muradrasoli, Anna Risberg, Karin Tegmark-Wisell                                                                                                                                                                                                                                                                                                                                                             |
| EPI_ISL_475795                                                                 | Center for Virology, Medical University of Vienna                                                                                                                                                                               | Berghaler laboratory, CeMM Research Center for Molecular Medicine of the Austrian Academy of Sciences | Alexandra Popa, Benedikt Agerer, Henrique Colaco, Lukas Endler, Jakob-Wendelin Genger, Alexander Lercher, Mark Smyth, Thomas Penz, Michael Schuster, Jan Laine, Martin Senekowitsch, Judith Aberle, Stephan Aberle, Peter Hufnagl, Daniela Schmid, Franz Allerberger, Elisabeth Puchhammer-Stoeckl, Manfred Nairz, Guenter Weiss, Gregor Hörmann, Kinga Rigler-Hohenwarter, Rainer Gattringer, Wegene Borena, Dorothee von Laer, Christoph Bock, Andreas Berghaler                                                                                                  |
| EPI_ISL_476238, EPI_ISL_476240, EPI_ISL_476249, EPI_ISL_476269, EPI_ISL_476275 | Hospital da Clínicas da Faculdade de Medicina da Universidade de São Paulo                                                                                                                                                      | Instituto de Medicina Tropical da Univesidade de São Paulo                                            | Samples: Ingra Morales Claro, Erika Regina Manuli, Cecilia Salette Alencar, Carolina S. Lazar, Silvia F. Costa; Sequencing: Ingra Morales Claro, Jaqueline Goes de Jesus, Erika Regina Manuli, Flavia Cristina da Silva Sales, Thais de Moura Coletti, Camila Alves Maia da Silva, Mariana Severo Ramundo, Giulia Magalhaes Ferreira, Darlan da Silva Candido, Julien Theze, Nuno Faria, Ester Sabino                                                                                                                                                               |
| EPI_ISL_476280, EPI_ISL_476298                                                 | DB Diagnósticos do Brasil                                                                                                                                                                                                       | Instituto de Medicina Tropical da Univesidade de São Paulo                                            | Samples: Nelson Gaburo Jr; Sequencing: Ingra Morales Claro, Jaqueline Goes de Jesus, Erika Regina Manuli, Flavia Cristina da Silva Sales, Thais de Moura Coletti, Camila Alves Maia da Silva, Mariana Severo Ramundo, Giulia Magalhaes Ferreira, Darlan da Silva Candido, Julien Theze, Nuno Faria, Ester Sabino                                                                                                                                                                                                                                                    |
| EPI_ISL_477010                                                                 | University of Debrecen, Department of Medical Microbiology                                                                                                                                                                      | National Laboratory of Virology, Szentágotthai Research Centre                                        | Endre Gábor Tóth, Balázs Somogyi, Brigitta Zana, Eszter Csoma, Ferenc Jakab, Gábor Kemenesi                                                                                                                                                                                                                                                                                                                                                                                                                                                                         |
| EPI_ISL_480210                                                                 | Department of Infectious Diseases, Kobe Institute of Health                                                                                                                                                                     | Pathogen Genomics Center, National Institute of Infectious Diseases                                   | Tsuyoshi Sekizuka, Ryohei Nomoto, Kentaro Itokawa, Rina Tanaka, Masanori Hashino, Hajime Kamiya, Motoi Suzuki, Makoto Kuroda                                                                                                                                                                                                                                                                                                                                                                                                                                        |
| EPI_ISL_480995                                                                 | ISGlobal, Institut de Salut Global de Barcelona                                                                                                                                                                                 | SeqCOVID-SPAIN consortium/IBV(CSIC)                                                                   | Alfredo Mayor, Alberto L Garcia-Basteiro, Carlota Dobaño, Gemma Moncunill, Pau Cisteró and SeqCOVID-SPAIN consortium                                                                                                                                                                                                                                                                                                                                                                                                                                                |
| EPI_ISL_481254                                                                 | Department of Emerging Infectious Diseases, Institute of Tropical Medicine, Nagasaki University                                                                                                                                 | Department of Emerging Infectious Diseases, Institute of Tropical Medicine, Nagasaki University       | Jiro Yasuda, Rokusuke Yoshikawa, Yuichiro Furusato, Haruka Abe                                                                                                                                                                                                                                                                                                                                                                                                                                                                                                      |
| EPI_ISL_481262                                                                 | Robert Koch Institute, National Reference center for Influenza, Berlin, Germany                                                                                                                                                 | Robert Koch Institute, Bioinformatics MF1, Berlin, Germany                                            | Marianne Wedde, Oliver Drechsel, Andrea Thuermer, Rene Kmiecinski, Ralf Duerrwald, Thorsten Wolff, Stephan Fuchs, Max v. Kleist                                                                                                                                                                                                                                                                                                                                                                                                                                     |
| EPI_ISL_482006                                                                 | PHE South West Regional Laboratory, National Infection Service                                                                                                                                                                  | Wellcome Sanger Institute for the COVID-19 Genomics UK (COG-UK) consortium                            | Stephanie Hutchings, Hannah Pymont, Dr Peter Muir, Barry Vipond, Rich Hopes; and Alex Alderton, Roberto Amato, Sonia Goncalves, Ewan Harrison, David K. Jackson, Ian Johnston, Dominic Kwiatkowski, Cordelia Langford, John Sillitoe on behalf of the Wellcome Sanger Institute COVID-19 Surveillance Team ( <a href="http://www.sanger.ac.uk/covid-team">http://www.sanger.ac.uk/covid-team</a> )                                                                                                                                                                  |
| EPI_ISL_482852                                                                 | Molecular Diagnostics Services (MDS)                                                                                                                                                                                            | KRISP, KZN Research Innovation and Sequencing Platform                                                | Giandhari J, Pillay S, Lessells R, Chimukangara B, Mdalose K, York D, Khan S, Tegally H, Wilkinson E, de Oliveira T                                                                                                                                                                                                                                                                                                                                                                                                                                                 |
| EPI_ISL_482995                                                                 | Minnesota Department of Health, Public Health Laboratory                                                                                                                                                                        | Minnesota Department of Health, Public Health Laboratory                                              | Matt Plumb, Jacob Garfin, and Xiong Wang                                                                                                                                                                                                                                                                                                                                                                                                                                                                                                                            |
| EPI_ISL_483121                                                                 | SA Pathology                                                                                                                                                                                                                    | SA Pathology                                                                                          | Lex Leong, Chuan Kok Lim, Mark Turra, Ivan Bastian, Geoff Higgins                                                                                                                                                                                                                                                                                                                                                                                                                                                                                                   |
| EPI_ISL_484123                                                                 | Centre for Clinical Infection and Diagnostics Research and Genomics Innovation Unit, Guy's and St. Thomas' NHS Trust                                                                                                            | COVID-19 Genomics UK (COG-UK) Consortium                                                              | Chloe Fisher, Luke Snell, Penny Cliff, Rahul Batra, Jonathan Edgeworth, Ali Raza Awan                                                                                                                                                                                                                                                                                                                                                                                                                                                                               |
| EPI_ISL_484645                                                                 | West of Scotland Specialist Virology Centre, NHSGGC / MRC-University of Glasgow Centre for Virus Research                                                                                                                       | COVID-19 Genomics UK (COG-UK) Consortium                                                              | Ana da Silva Filipe, Natasha Johnson, Kathy Smollett, Daniel Mair, Stephen Carmichael, Lily Tong, Jenna Nichols, Elihu Aranday-Cortes, Kirstyn Brunker, Yasmin Parr, Alice Broos, Kyriaki Nomikou; Sarah McDonald, Marc Niebel, Patawee Asamaphan; Richard Orton, Joseph Hughes, Sreenu Vattipally, David L Robertson; Alasdair MacLean, Rory Gunson; Kathy Li, Natasha Jesudason, Rajiv Shah, James Shephard, Antonia Ho, Emma Thomson                                                                                                                             |
| EPI_ISL_486844                                                                 | Institute of Microbiology, Universidad San Francisco de Quito                                                                                                                                                                   | Institute of Microbiology, Universidad San Francisco de Quito                                         | Belén Prado-Vivar, Sully Márquez, Juan José Guadalupe, Monica Becerra-Wong, Carla Torres, Bernardo Gutiérrez, Fausto Maldonado, Geovanny Carzola, Verónica Barragán, Patricio Rojas-Silva, Gabriel Trueba, Michelle Grunauer, Paul Cárdenas                                                                                                                                                                                                                                                                                                                         |

|                                                                |                                                                                                                                                                                                                                                                                              |                                                                                                                                                                                                                                                                                               |                                                                                                                                                                                                                                                                                                                                                                                                                                                                                                                                                                                                                                                                                                                                                                                                                                                           |
|----------------------------------------------------------------|----------------------------------------------------------------------------------------------------------------------------------------------------------------------------------------------------------------------------------------------------------------------------------------------|-----------------------------------------------------------------------------------------------------------------------------------------------------------------------------------------------------------------------------------------------------------------------------------------------|-----------------------------------------------------------------------------------------------------------------------------------------------------------------------------------------------------------------------------------------------------------------------------------------------------------------------------------------------------------------------------------------------------------------------------------------------------------------------------------------------------------------------------------------------------------------------------------------------------------------------------------------------------------------------------------------------------------------------------------------------------------------------------------------------------------------------------------------------------------|
| EPI_ISL_487370                                                 | Hellenic Pasteur Institute, National Influenza Reference laboratory of Southern Greece & Unit of Bioinformatics and Applied Genomics                                                                                                                                                         | Hellenic Pasteur Institute, National Influenza Reference laboratory of Southern Greece & Unit of Bioinformatics and Applied Genomics                                                                                                                                                          | Vasiliki Pogka, Timokratis Karamitros, Athanasios Kossyvakis, Antonios Kalliaropoulos, Horefti Elina, Evangelidou Maria, Androniki Voulgari-Kokota, Aspasia Kontou, Andreas Mentis                                                                                                                                                                                                                                                                                                                                                                                                                                                                                                                                                                                                                                                                        |
| EPI_ISL_488872                                                 | Department of Medical Microbiology, Western Sussex Hospitals NHS Foundation Trust, St Richard's Hospital                                                                                                                                                                                     | Wellcome Sanger Institute for the COVID-19 Genomics UK (COG-UK) consortium                                                                                                                                                                                                                    | Manasa Mutingwende, Sarah Lowdon, Olga Podplomy, Michelle Erkiert, Jonathan Lewis, Paul Randell and Alex Alderton, Roberto Amato, Sonia Goncalves, Ewan Harrison, David K. Jackson, Ian Johnston, Dominic Kwiatkowski, Cordelia Langford, John Sillitoe on behalf of the Wellcome Sanger Institute COVID-19 Surveillance Team ( <a href="http://www.sanger.ac.uk/covid-team">http://www.sanger.ac.uk/covid-team</a> )                                                                                                                                                                                                                                                                                                                                                                                                                                     |
| EPI_ISL_488905                                                 | Virology Department, Royal Infirmary of Edinburgh, NHS Lothian / School of Biological Sciences, University of Edinburgh                                                                                                                                                                      | Wellcome Sanger Institute for the COVID-19 Genomics UK (COG-UK) consortium                                                                                                                                                                                                                    | McHugh M, Dewar R, Rooke S, O'Toole A, Scher E, Hill V, McCrone JT, Colquhoun R, Yu X, Jackson B, Rambaut A, Templeton K and Alex Alderton, Roberto Amato, Sonia Goncalves, Ewan Harrison, David K. Jackson, Ian Johnston, Dominic Kwiatkowski, Cordelia Langford, John Sillitoe on behalf of the Wellcome Sanger Institute COVID-19 Surveillance Team ( <a href="http://www.sanger.ac.uk/covid-team">http://www.sanger.ac.uk/covid-team</a> )                                                                                                                                                                                                                                                                                                                                                                                                            |
| EPI_ISL_491117                                                 | The National Institute of Public Health                                                                                                                                                                                                                                                      | The National Institute of Public Health and State Veterinary Institute Prague                                                                                                                                                                                                                 | Nagy,A;Jirincova,H;Novakova,L;Trnka,D;Vecerova,J                                                                                                                                                                                                                                                                                                                                                                                                                                                                                                                                                                                                                                                                                                                                                                                                          |
| EPI_ISL_491125                                                 | Oman-National Influenza Center                                                                                                                                                                                                                                                               | Biotechnology & OMICs Laboratory                                                                                                                                                                                                                                                              | Samira Al-Mahruqi, Abdul Latif Khan, Samiha Al-Kharusi, Adil Khan , Ahmed Al-Rawahi, Sajjad Asaf, Amina Al-Jardani, Hanan Al-Kindi, Intisar Al-Shukri, Ahlam Al-Amri, Aisha Al-Amri, Aisha Al-Busaidi, Adil Al-Wahaibi, Seif Al-Abri, Ahmed Al-Harrasi                                                                                                                                                                                                                                                                                                                                                                                                                                                                                                                                                                                                    |
| EPI_ISL_491218, EPI_ISL_491220                                 | Instituto Gulbenkian de Ciência                                                                                                                                                                                                                                                              | Instituto Gulbenkian de Ciência                                                                                                                                                                                                                                                               | Cathy Paulino, Joao Sobral, Susana Ladeiro, João Costa, Ricardo Leite                                                                                                                                                                                                                                                                                                                                                                                                                                                                                                                                                                                                                                                                                                                                                                                     |
| EPI_ISL_492073                                                 | 1. ViroGenetics - BSL3 Laboratory of Virology, Maopolska Centre of Biotechnology, Jagiellonian University; 2. II Department of Internal Medicine, Faculty of Medicine, Jagiellonian University Medical College; 3. Narodowy Instytut Zdrowia Publicznego - Pastwowy Zakad Higieny (NIZP-PZH) | 1. ViroGenetics - BSL3 Laboratory of Virology, Maopolska Centre of Biotechnology, Jagiellonian University; 2. II Department of Internal Medicine, Faculty of Medicine, Jagiellonian University Medical College; 3. Narodowy Instytut Zdrowia Publicznego - Pastwowy Zakad Higieny (NIZP-PZH). | Katarzyna Pancer, Marek Sanak, Aleksandra A. Zasada, Magdalena Rzczekowska, Tomasz Wokowicz, Katarzyna Zacharczuk, Agnieszka Koakowska-Kulesza, Katarzyna Owczarek, Aleksandra Milewska, Natalia Wolaniuk, Ewelina Hallman-Szeliska, Pawe P abaj, Wojciech Branicki, Krzysztof Pyr                                                                                                                                                                                                                                                                                                                                                                                                                                                                                                                                                                        |
| EPI_ISL_492077                                                 | Institute for Public Health of the Republic of North Macedonia                                                                                                                                                                                                                               | Charite Universitätsmedizin Berlin, Institute of Virology                                                                                                                                                                                                                                     | Victor M Corman, Joern Beheim-Schwarzbach, Barbara Muhlemann, Talitha Veith, Julia Schneider, Elizabeta Jancheska, Maja Kuzmanovska, Golubinka Bosevska, Terry Jones, Christian Drosten                                                                                                                                                                                                                                                                                                                                                                                                                                                                                                                                                                                                                                                                   |
| EPI_ISL_492767                                                 | PHE South West Regional Laboratory, National Infection Service                                                                                                                                                                                                                               | Wellcome Sanger Institute for the COVID-19 Genomics UK (COG-UK) consortium                                                                                                                                                                                                                    | Stephanie Hutchings, Hannah Pymont, Dr Peter Muir, Barry Vipond, Rich Hopes; and Alex Alderton, Roberto Amato, Sonia Goncalves, Ewan Harrison, David K. Jackson, Ian Johnston, Dominic Kwiatkowski, Cordelia Langford, John Sillitoe on behalf of the Wellcome Sanger Institute COVID-19 Surveillance Team ( <a href="http://www.sanger.ac.uk/covid-team">http://www.sanger.ac.uk/covid-team</a> )                                                                                                                                                                                                                                                                                                                                                                                                                                                        |
| EPI_ISL_494121                                                 | Originating lab: Wales Specialist Virology Centre<br>Sequencing lab: Pathogen Genomics Unit                                                                                                                                                                                                  | COVID-19 Genomics UK (COG-UK) Consortium                                                                                                                                                                                                                                                      | Catherine Moore, Johnathan Evans, Laura Gifford, Malorie Perry, Simon Cottrell, Angela Marchbank, Alec Birchley, Alexander Adams, Amy Gaskin, Bree Gatica-Wilcox, Jason Coombes, Joel Southgate, Lauren Gilbert, Lee Graham, Nicole Pacchiari, Sara Kumziene-Summerhayes, Sarah Taylor, Sophie Jones, Sara Rey, Matthew Bull, Joanne Watkins, Sally Corden, Tom Connor                                                                                                                                                                                                                                                                                                                                                                                                                                                                                    |
| EPI_ISL_496683                                                 | Gorgas Memorial Laboratory of Health Studies                                                                                                                                                                                                                                                 | Gorgas Memorial Laboratory of Health Studies                                                                                                                                                                                                                                                  | Danilo Franco, Claudia Gonzalez Sandra Lopez-Verges, Alexander A Martinez                                                                                                                                                                                                                                                                                                                                                                                                                                                                                                                                                                                                                                                                                                                                                                                 |
| EPI_ISL_498186                                                 | OUCRU                                                                                                                                                                                                                                                                                        | OUCRU                                                                                                                                                                                                                                                                                         | Nguyen Van Vinh Chau, Nguyen Thi Thu Hong, Nguyen Thi Han Ny, Le Nguyen Truc Nhu, Nghiem My Ngoc, Vo Thanh Lam, Nguyen Thanh Dung, Lam Minh Yen, Ngo Ngoc Quang Minh, Le Manh Hung, Nguyen Tri Dung, Dinh Nguyen Huy Man, Lam Anh Nguyet, Tran Chanh Xuan, Tran Tinh Hien, Nguyen Thanh Phong, Tran Nguyen Hoang Tu, Tran Tan Thanh, Nguyen Thanh Truong, Nguyen Tan Binh, Tang Chi Thuong, Guy Thwaites, and Le Van Tan, for OUCRU COVID-19 research group*                                                                                                                                                                                                                                                                                                                                                                                              |
| EPI_ISL_498830                                                 | National Institute of Laboratory Medicine and Referral Center                                                                                                                                                                                                                                | Genomic Research Lab, BCSIR                                                                                                                                                                                                                                                                   | Abu Sayeed Mohammad Mahmud, Mohammad Samir Uzzaman, Eshrar Osman, Md. Ahasan Habib, Shahina Akter, Tanjina Akhter Banu, Md. Murshed Hasan Sarkar, Barna Goswami, Iffat Jahan, Md. Saddam Hossain, Tasnim Nafisa, Md. Maruf Ahmed Molla, Mahmuda Yeasmin, Asish Kumar Ghosh, A. K. M. Shamsuzzaman, Sheikh Md. Selim Al Din, Utpal Chandra Ray, Salek Ahmed Sajib, Md. Salim Khan                                                                                                                                                                                                                                                                                                                                                                                                                                                                          |
| EPI_ISL_500120                                                 | Liverpool Clinical Laboratories                                                                                                                                                                                                                                                              | COVID-19 Genomics UK (COG-UK) Consortium                                                                                                                                                                                                                                                      | Sam Haldenby, Anita Lucaci, Steve Paterson, Julian Hiscox, Alistair Darby, M Almsaud, A Alrezaihi, Muhannad Alruwaili, Stuart D Armstrong, Jones Benjamin, Eleanor G Bentley, Anu Chawla, Jordan J Clark, Angela Cowell, Richard Eccles, Isabel Garcia-Dorival, Matthew Gemmell, Alessandro Gerada, PKF Gilmore, Richard Gregory, Ximeng Han, Catherine Hartley, Margaret Hughes, Miren Iturriza-Gomara, James Johnson, L Luu, Jennifer Manson, Charlotte Nelson, Elaine O'Toole, Cassie Olateju, Rebekah Penrice-Randal , Lucille Rainbow, N.P Randle, Trevor Ian Robinson, Parul Sharma, Ghada T Shawli, James P Stewart, Neil Swainston, Ecaterina Vamos, Joanne Watts, Mark Whitehead                                                                                                                                                                 |
| EPI_ISL_500866, EPI_ISL_500868, EPI_ISL_500871, EPI_ISL_500872 | LACEN/PE                                                                                                                                                                                                                                                                                     | WallauLab, Aggeu Magalhaes Institute                                                                                                                                                                                                                                                          | Marcelo Henrique Santos Paiva, Duschinka Ribeiro Duarte Guedes, Cássia Docena, Matheus Filgueira Bezerra, Filipe Zimmer Dezordi, Laís Ceschini Machado, Larissa Krokovsky, Elisama Helvecio, Alexandre Freitas da Silva, Luydson Richardson Silva Vasconcelos, Antonio Mauro Rezende, Severino Jefferson Ribeiro da Silva, Kamila Gaudêncio da Silva Sales, Bruna Santos Lima Figueiredo de Sá, Derciliano Lopes da Cruz, Claudio Eduardo Cavalcanti, Armando de Menezes Neto, Caroline Targino Alves da Silva, Renata Pessoa Germano Mendes, Maria Almerice Lopes da Silva, Tiago Gräf, Paola Cristina Resende, Gonzalo Bello, Michelle da Silva Barros, Wheverton Ricardo Correia do Nascimento, Rodrigo Moraes Loyo Arcoverde, Luciane Caroline Albuquerque Bezerra, Sinval Pinto Brandão Filho, Constância Flávia Junqueira Ayres, Gabriel Luz Wallau |
| EPI_ISL_501817                                                 | Centri laboratorija                                                                                                                                                                                                                                                                          | Latvian Biomedical Research and Study Centre                                                                                                                                                                                                                                                  | Ivars Silamielis, Kaspars Megris, Monta Ustinova, ika Zrelovs, Vita Rovte, Stella Lapia, Jana Oste, Marta Priedte, Uga Dumpis, Jnis Klovš                                                                                                                                                                                                                                                                                                                                                                                                                                                                                                                                                                                                                                                                                                                 |
| EPI_ISL_509207                                                 | OHSU Lab Services Molecular Microbiology Lab                                                                                                                                                                                                                                                 | Oregon SARS-CoV-2 Genome Sequencing Center                                                                                                                                                                                                                                                    | Brendan L. O'Connell, Ruth V. Nichols, Sally B. Grindstaff, Alec J. Hirsch, Guang Fan, Daniel N. Streblow, William B. Messer, Andrew C. Adey, Benjamin N. Bimber, Brian J. O'Roak                                                                                                                                                                                                                                                                                                                                                                                                                                                                                                                                                                                                                                                                         |
| EPI_ISL_509233                                                 | NHLS-IALCH                                                                                                                                                                                                                                                                                   | KRISP, KZN Research Innovation and Sequencing Platform                                                                                                                                                                                                                                        | Giandhari J, Pillay S, Lessells R, Mdlalose K, York D, Tegally H, Wilkinson E, de Oliveira T                                                                                                                                                                                                                                                                                                                                                                                                                                                                                                                                                                                                                                                                                                                                                              |
| EPI_ISL_510499                                                 | Servicio de Microbiología, Hospital Universitario Donostia, OSI Donostialdea, Área de Enfermedades Infecciosas, Grupo de Infección Respiratoria y Resistencia Antimicrobiana. Instituto de Investigación Sanitaria Biodonostia                                                               | SeqCOVID-SPAIN consortium/IBV(CSIC)                                                                                                                                                                                                                                                           | Gustavo Cilla, Milagrosa Montes, Luis Piñeiro, Jose Maria Marimón and SeqCOVID-SPAIN consortium                                                                                                                                                                                                                                                                                                                                                                                                                                                                                                                                                                                                                                                                                                                                                           |
| EPI_ISL_511450, EPI_ISL_511722                                 | Instituto Nacional de Saude (INSA)                                                                                                                                                                                                                                                           | Instituto Nacional de Saude (INSA)                                                                                                                                                                                                                                                            | Borges et al                                                                                                                                                                                                                                                                                                                                                                                                                                                                                                                                                                                                                                                                                                                                                                                                                                              |
| EPI_ISL_511865                                                 | Johns Hopkins Hospital Department of Pathology                                                                                                                                                                                                                                               | Johns Hopkins Hospital Department of Pathology                                                                                                                                                                                                                                                | Peter M. Thielen, Thomas Mehoke, Shirlee Wohl, Srividya Ramakrishnan, Melanie Kirsche, Amanda Erlund, Craig Howser, Kristina Zudock, Oluwaseun Falade-Nwulia, Norah Sadowski, Paul Morris, Mark Hopkins, Yunfan Fan, Nidia Trouva, Victoria Gniazdowski, Michael C. Schatz, Stuart C. Ray, Winston Timp, Heba H. Mostafa                                                                                                                                                                                                                                                                                                                                                                                                                                                                                                                                  |
| EPI_ISL_512502                                                 | Wales Specialist Virology Centre Sequencing lab: Pathogen Genomics Unit                                                                                                                                                                                                                      | COVID-19 Genomics UK (COG-UK) Consortium                                                                                                                                                                                                                                                      | Catherine Moore, Johnathan Evans, Laura Gifford, Malorie Perry, Simon Cottrell, Angela Marchbank, Alec Birchley, Alexander Adams, Amy Gaskin, Bree Gatica-Wilcox, Jason Coombes, Joel Southgate, Lauren Gilbert, Lee Graham, Nicole Pacchiari, Sara Kumziene-Summerhayes, Sarah Taylor, Sophie Jones, Sara Rey, Matthew Bull, Joanne Watkins, Sally Corden, Tom Connor                                                                                                                                                                                                                                                                                                                                                                                                                                                                                    |
| EPI_ISL_512617                                                 | National Laboratory for Influenza/Virology reference laboratory, Public Health Center of the Ministry of Health of Ukraine                                                                                                                                                                   | Respiratory Virus Unit, Microbiology Services Colindale, Public Health England                                                                                                                                                                                                                | PHE Covid Sequencing Team, Dr. Iryna Demchyshyna                                                                                                                                                                                                                                                                                                                                                                                                                                                                                                                                                                                                                                                                                                                                                                                                          |
| EPI_ISL_512663                                                 | Area De Salud Alajuela Norte - Clinica Dr. Marcial Rodriguez                                                                                                                                                                                                                                 | Inciensa, Instituto Costarricense de Investigación y Enseñanza en Nutrición y Salud                                                                                                                                                                                                           | Francisco Duarte, Hebleen Porras, Claudio Soto-Garita, Estela Cordero, Adriana Godinez & Melany Calderon                                                                                                                                                                                                                                                                                                                                                                                                                                                                                                                                                                                                                                                                                                                                                  |
| EPI_ISL_512674                                                 | Hospital De Niños Dr. Carlos Saenz Herrera [San Jose/San Jose]                                                                                                                                                                                                                               | Inciensa, Instituto Costarricense de Investigación y Enseñanza en Nutrición y Salud                                                                                                                                                                                                           | Francisco Duarte, Hebleen Porras, Claudio Soto-Garita, Estela Cordero, Adriana Godinez & Melany Calderon                                                                                                                                                                                                                                                                                                                                                                                                                                                                                                                                                                                                                                                                                                                                                  |
| EPI_ISL_513198                                                 | Pathogen Genomics Lab King Abdullah University of Science and Technology(KAUST)                                                                                                                                                                                                              | Pathogen Genomics Lab King Abdullah University of Science and Technology(KAUST)                                                                                                                                                                                                               | Rahul P Salunke, Sharif Hala, Raaeece Naem, Sara Mfarrej, Amit Kumar Subudhi, Amanda Ooi, Luke Esau, Fadwa Alofi, Fathia Ben Rached, Afrah Alsomali, Asim Khogeer, Ahmad Bakur Mahmoud, Anwar Hashem, Naif Almontashiri, Arnab Pain                                                                                                                                                                                                                                                                                                                                                                                                                                                                                                                                                                                                                       |
| EPI_ISL_513315                                                 | South Eastern Area Laboratory Services (SEALS)                                                                                                                                                                                                                                               | NSW Health Pathology - Institute of Clinical Pathology                                                                                                                                                                                                                                        | CIDM-PH et al.                                                                                                                                                                                                                                                                                                                                                                                                                                                                                                                                                                                                                                                                                                                                                                                                                                            |

|                |                                                                                                                                                                                                                                                                                       |                                                                                                                                               |                                                                                                                                                                                                                                                                                                                                                                                                                                                                                                                                                                                                                                                                                         |
|----------------|---------------------------------------------------------------------------------------------------------------------------------------------------------------------------------------------------------------------------------------------------------------------------------------|-----------------------------------------------------------------------------------------------------------------------------------------------|-----------------------------------------------------------------------------------------------------------------------------------------------------------------------------------------------------------------------------------------------------------------------------------------------------------------------------------------------------------------------------------------------------------------------------------------------------------------------------------------------------------------------------------------------------------------------------------------------------------------------------------------------------------------------------------------|
|                |                                                                                                                                                                                                                                                                                       | and Medical Research; Westmead Hospital; University of Sydney                                                                                 |                                                                                                                                                                                                                                                                                                                                                                                                                                                                                                                                                                                                                                                                                         |
| EPI_ISL_515179 | National Institute for Communicable Diseases of the National Health Laboratory Service                                                                                                                                                                                                | National Institute for Communicable Diseases of the National Health Laboratory Service                                                        | Allam M, Ismail A, Khumalo Z, Kwenda S, Mtshali P, Mnyameni F, Mohale T, Bhiman JN                                                                                                                                                                                                                                                                                                                                                                                                                                                                                                                                                                                                      |
| EPI_ISL_515250 | Texas Department of State Health Services                                                                                                                                                                                                                                             | Texas Department of State Health Services                                                                                                     | Rashmi Tuladhar, Bonnie Oh, Cara Akrou, Jenny Zhang, Maliha Rahman, Anita Pokharel, Myong Koag, Chun Wang, Rachel Lee, Grace Kubin                                                                                                                                                                                                                                                                                                                                                                                                                                                                                                                                                      |
| EPI_ISL_515526 | Hospital Municipal do Tatuape Carimino Caricchio                                                                                                                                                                                                                                      | Instituto Adolfo Lutz, Interdisciplinary Procedures Center, Strategic Laboratory                                                              | Claudio Tavares Sacchi, Claudia Regina Gonçalves, Erica Valessa Ramos Gomes                                                                                                                                                                                                                                                                                                                                                                                                                                                                                                                                                                                                             |
| EPI_ISL_515572 | NHLS-IALCH                                                                                                                                                                                                                                                                            | KRISP, KZN Research Innovation and Sequencing Platform                                                                                        | Giandhari J, Pillay S, Lessells R, Mdlalose K, York D, Khan S, Tegally H, Wilkinson E, de Oliveira T                                                                                                                                                                                                                                                                                                                                                                                                                                                                                                                                                                                    |
| EPI_ISL_516430 | Clinical Hospital - Shtip                                                                                                                                                                                                                                                             | Research Center for Genetic Engineering and Biotechnology "Georgi D. Efremov", Macedonian Academy of Sciences and Arts                        | RCGEB - MASA                                                                                                                                                                                                                                                                                                                                                                                                                                                                                                                                                                                                                                                                            |
| EPI_ISL_516586 | Viollier AG                                                                                                                                                                                                                                                                           | Department of Biosystems Science and Engineering, ETH Zürich                                                                                  | Christian Beisel, Sarah Nadeau, Ivan Topolsky, Pedro Ferreira, Philipp Jablonski, Susana Posada-Céspedes, Tobias Schär, Ina Nissen, Natascha Santacroce, Elodie Burcklen, Christiane Beckmann, Maurice Redondo, Olivier Kobel, Christoph Noppen, Sophie Seidel, Noemie Santamaria de Souza, Niko Beerenwinkel, Tanja Stadler                                                                                                                                                                                                                                                                                                                                                            |
| EPI_ISL_516848 | North West London Pathology, Imperial College Healthcare NHS Trust                                                                                                                                                                                                                    | Wellcome Sanger Institute for the COVID-19 Genomics UK (COG-UK) consortium                                                                    | Ling Li, Paul Randell, David Muir, Frankie Bolt, Alison Holmes, James Price, Aileen Rowan, Graham Taylor, Anjina Badhan, Carolina Herrera and Alex Alderton, Roberto Amato, Sonia Goncalves, Ewan Harrison, David K. Jackson, Ian Johnston, Dominic Kwiatkowski, Cordelia Langford, John Sillitoe on behalf of the Wellcome Sanger Institute COVID-19 Surveillance Team ( <a href="http://www.sanger.ac.uk/covid-team">http://www.sanger.ac.uk/covid-team</a> )                                                                                                                                                                                                                         |
| EPI_ISL_516923 | Department for Molecular Diagnostics, Centre for Medical Microbiology, Institute of Public Health of Montenegro                                                                                                                                                                       | Charite Universitätsmedizin Berlin, Institut für Virologie                                                                                    | Victor M Corman, Terry Jones, Jörn Beheim-Schwarzbach, Barbara Muehleemann, Talitha Veith, Julia Schneider, Marija Govedarica and Danijela Vujošević, Christian Drosten                                                                                                                                                                                                                                                                                                                                                                                                                                                                                                                 |
| EPI_ISL_516938 | Nicolae Testemitanu State University of Medicine and Pharmacy                                                                                                                                                                                                                         | International Centre for Genetic Engineering and Biotechnology (ICGEB) and ARGO Open Lab Platform for Genome Sequencing                       | Ulinici M, Licastro D, Dal Monego S, Rajasekharan S, Marcello A                                                                                                                                                                                                                                                                                                                                                                                                                                                                                                                                                                                                                         |
| EPI_ISL_517437 | Liverpool Clinical Laboratories                                                                                                                                                                                                                                                       | COVID-19 Genomics UK (COG-UK) Consortium                                                                                                      | Sam Haldenby, Anita Lucaci, Steve Paterson, Julian Hiscox, Alistair Darby, M Almsaud, A Alrezaihi, Muhannad Alruwaili, Stuart D Armstrong, Jones Benjamin, Eleanor G Bentley, Anu Chawla, Jordan J Clark, Angela Cowell, Richard Eccles, Isabel Garcia-Dorival, Matthew Gemmell, Alessandro Gerada, PKF Gilmore, Richard Gregory, Ximeng Han, Catherine Hartley, Margaret Hughes, Miren Iturriza-Gomara, James Johnson, L Luu, Jenifer Manson, Charlotte Nelson, Elaine O'Toole, Cassie Olateju, Rebekah Penrice-Randal, Lucille Rainbow, N.P Randle, Trevor Ian Robinson, Parul Sharma, Ghada T Shawli, James P Stewart, Neil Swainston, Ecaterina Vamos, Joanne Watts, Mark Whitehead |
| EPI_ISL_522467 | Center for Laboratory Control of Infectious Diseases, Korea Centers for Diseases Control and Prevention                                                                                                                                                                               | Center for Laboratory Control of Infectious Diseases, Korea Centers for Diseases Control and Prevention                                       | Junyoung Kim, Ae Kyung Park, Eunkyung Shin, Jin Sun No, Jeong-Min Kim, Yoon-Seok Chung, Heui Man Kim, Myung Guk Han                                                                                                                                                                                                                                                                                                                                                                                                                                                                                                                                                                     |
| EPI_ISL_522475 | Division of Viral Diseases, Center for Laboratory Control of Infectious Diseases, Korea Centers for Diseases Control and Prevention                                                                                                                                                   | Division of Viral Diseases, Center for Laboratory Control of Infectious Diseases, Korea Centers for Diseases Control and Prevention           | Jeong-Min Kim, Yoon-Seok Chung, Namjoo Lee, Sang Hee Woo, Hye-Jun Jo, Heui Man Kim, Jun-Sub Kim, Myung Guk Han                                                                                                                                                                                                                                                                                                                                                                                                                                                                                                                                                                          |
| EPI_ISL_522857 | ULSS9 Scaligera                                                                                                                                                                                                                                                                       | Istituto Zooprofilattico Sperimentale delle Venezie                                                                                           | Adelaide Milani, Alessia Schivo, Annalisa Salviato, Erika Giorgia Quaranta, Gianpiero Zamperin, Ambra Pastori, Bianca Zecchin, Alice Fusaro, Calogero Terregino, Antonia Ricci                                                                                                                                                                                                                                                                                                                                                                                                                                                                                                          |
| EPI_ISL_522875 | Instituto Nacional de Medicina Genomica                                                                                                                                                                                                                                               | Instituto Nacional de Medicina Genomica                                                                                                       | Hidalgo-Miranda A, Mendoza-Vargas A, Reyes-Grajeda JP, Cisneros-Villanueva M, Cedro-Tanda A, Hurtado-Cordova E, Peñaloza-Figueroa F, Herrera-Montalvo LA                                                                                                                                                                                                                                                                                                                                                                                                                                                                                                                                |
| EPI_ISL_523125 | Dutch COVID-19 response team                                                                                                                                                                                                                                                          | Erasmus Medical Center                                                                                                                        | Bas Oude Munnink, David Nieuwenhuijse, Reina Sikkema, Claudia Schapendonk, Irina Chestakova, Anne van der Linden, Theo Bestebroer, Stefan van Nieuwkamp, Mark Pronk, Pascal Lexmond, Corien Swaan, Manon Haverkate, Madelief Mollers, Mart Stein, Sandra Kengne Kanga Mobou, Jeroen van Kampen, Jolanda Voermans, Aura Timen, Corine Geurtsvankessel, Annemiek van der Eijk, Richard Molenkamp, Marion Koopmans, on behalf of the Dutch national COVID-19 response team.                                                                                                                                                                                                                |
| EPI_ISL_523997 | WHO National Influenza Centre Russian Federation                                                                                                                                                                                                                                      | WHO National Influenza Centre Russian Federation                                                                                              | Andrey Komissarov, Artem Fadeev, Mariia Sergeeva, Anna Ivanova, Daria Danilenko                                                                                                                                                                                                                                                                                                                                                                                                                                                                                                                                                                                                         |
| EPI_ISL_524473 | Laboratorio de Referencia Nacional de Virus Respiratorio. Centro Nacional de Salud Publica. Instituto Nacional de Salud Peru.                                                                                                                                                         | Laboratorio de Referencia Nacional de Biotecnología y Biología Molecular. Centro Nacional de Salud Publica. Instituto Nacional de Salud Peru. | Carlos Padilla Rojas, Karolyn Vega Chozo, Priscila Lope Pari, Omar Caceres Rey, Marco Galarza Perez, Maribel Huaranga Nuñez, Johanna Balbuena Torres, Henri Bailon Calderon, Nancy Rojas Serrano.                                                                                                                                                                                                                                                                                                                                                                                                                                                                                       |
| EPI_ISL_525565 | Istituto Zooprofilattico Sperimentale Puglia e Basilicata; Dipartimento di Bioscienze, Biotecnologie e Biofarmaceutica dell'Università degli Studi di Bari "A.Moro"; Istituto di Biomembrane. Bioenergetica e Biotecnologie Molecolari del Consiglio Nazionale delle Ricerche di Bari | Beaconlab (Bioinformatics, Evolution and Comparative Genomics lab), Dept of Biosciences, University on Milan                                  | Parisi A.,Pesole G., Manzari C., Chiara M                                                                                                                                                                                                                                                                                                                                                                                                                                                                                                                                                                                                                                               |
| EPI_ISL_526034 | OHSU Lab Services Molecular Microbiology Lab                                                                                                                                                                                                                                          | Oregon SARS-CoV-2 Genome Sequencing Center                                                                                                    | Brendan L. O'Connell, Ruth V. Nichols, Alec J. Hirsch, Guang Fan, Daniel N. Streblow, William B. Messer, Andrew C. Adey, Benjamin N. Bimber, Brian J. O'Roak                                                                                                                                                                                                                                                                                                                                                                                                                                                                                                                            |
| EPI_ISL_526273 | Unity Health Toronto                                                                                                                                                                                                                                                                  | Ontario Institute for Cancer Research                                                                                                         | Ramzi Fattouh, Larissa M. Matukas, Mark Downing, Annette Gower, Karel Boissinot, Samira Mubareka, TIBDN, Ilinca Lungu, Bernard Lam, Jeremy Johns, Paul Krzyzanowski, Richard de Borja, Felicia Vincelli, Philip Zuzarte, Jared Simpson                                                                                                                                                                                                                                                                                                                                                                                                                                                  |
| EPI_ISL_527819 | Centro de Investigaciones, Universidad de Especialidades Espíritu Santo                                                                                                                                                                                                               | Institute of Microbiology, Universidad San Francisco de Quito                                                                                 | Derly Andrade, Juan Carlos Fernandez, Belén Prado-Vivar, Sully Márquez, Juan José Guadalupe, Monica Becerra-Wong, Bernardo Gutiérrez, Gabriel Morey, Ruben Armas, Jose Pedro Barberan, Fernando Espinoza, Edith Lope, Verónica Barragán, Patricio Rojas-Silva, Gabriel Trueba, Michelle Grunauer, Paúl Cárdenas                                                                                                                                                                                                                                                                                                                                                                         |
| EPI_ISL_527840 | Texas Department of State Health Services                                                                                                                                                                                                                                             | Texas Department of State Health Services                                                                                                     | Bonnie Oh, Rashmi Tuladhar, Jenny Zhang, Maliha Rahman, Anita Pokharel, Myong Koag, Chun Wang, Rachel Lee, Grace Kubin                                                                                                                                                                                                                                                                                                                                                                                                                                                                                                                                                                  |
| EPI_ISL_527906 | Nigeria Centre for Disease Control (NCDC)                                                                                                                                                                                                                                             | African Centre of Excellence for Genomics of Infectious Diseases (ACEGID), Redeemer's University, Ede, Osun State, Nigeria                    | Oluniyi P.E. et al                                                                                                                                                                                                                                                                                                                                                                                                                                                                                                                                                                                                                                                                      |
| EPI_ISL_529026 | Ospedale "Giuseppe Mazzini"-Teramo                                                                                                                                                                                                                                                    | Istituto Zooprofilattico Sperimentale dell'Abruzzo e Molise "G.Caporale"                                                                      | Lorusso A, Marcacci M, Di Domenico M, Curini V, Ancora M, Cammà C, Rinaldi A, Mangone I, Di Pasquale A, Puglia I, Savini G.                                                                                                                                                                                                                                                                                                                                                                                                                                                                                                                                                             |
| EPI_ISL_529077 | Laboratorio de Referencia Nacional de Virus Respiratorios, Instituto Nacional de Salud Peru                                                                                                                                                                                           | Laboratorio de Genómica Microbiana, Universidad Peruana Cayetano Heredia                                                                      | Pablo Tsukayama, Alejandra Dávila-Barclay, Luis González, Pedro E. Romero, Brenda Ayzano, Janet Huancachoque, Pool Marcos, Maribel Huaranga                                                                                                                                                                                                                                                                                                                                                                                                                                                                                                                                             |
| EPI_ISL_529148 | Democritus University of Thrace, Department of Medicine                                                                                                                                                                                                                               | Democritus University of Thrace, Department of Medicine                                                                                       | Kassela,K., Dovrolis,N., Bampali,M., Gatzidou,E., Froukala,E., Stavropoulou,A., Veletza,S., Tsakris,A., Spanakis,N., Karakasiliotis,I.                                                                                                                                                                                                                                                                                                                                                                                                                                                                                                                                                  |
| EPI_ISL_529795 | NHLS-IALCH                                                                                                                                                                                                                                                                            | KRISP, KZN Research Innovation and Sequencing Platform                                                                                        | Giandhari J, Pillay S, Lessells R, Mdlalose K, York D, Khan S, Tegally H, Wilkinson E, de Oliveira T                                                                                                                                                                                                                                                                                                                                                                                                                                                                                                                                                                                    |
| EPI_ISL_530104 | Hospital Universitario Ramón y Cajal                                                                                                                                                                                                                                                  | Hospital Universitario La Paz                                                                                                                 | Raúl Recio, Sara González, Elias Dahdouh, Fernando Lázaro, Esther Viedma, Natalia Stella, Julio García, Juan Carlos Galán, Rafael Cantón, Mª Dolores Folgueira, Rafael Delgado, Jesús Mingorance                                                                                                                                                                                                                                                                                                                                                                                                                                                                                        |

|                                                                |                                                                                                          |                                                                            |                                                                                                                                                                                                                                                                                                                                                                                                                                                                                                                                                                                                  |
|----------------------------------------------------------------|----------------------------------------------------------------------------------------------------------|----------------------------------------------------------------------------|--------------------------------------------------------------------------------------------------------------------------------------------------------------------------------------------------------------------------------------------------------------------------------------------------------------------------------------------------------------------------------------------------------------------------------------------------------------------------------------------------------------------------------------------------------------------------------------------------|
| EPI_ISL_530128                                                 | Seattle Flu Study                                                                                        | Seattle Flu Study                                                          | Deborah A. Nickerson, Chris D. Frazer, Jover Lee, Benjamin Pelle, Matthew Richardson, Amanda Adler, Elisabeth Brandtetter, Peter D. Han, Kairsten Fay, Misja Ilcin, Kirsten Lacombe, Thomas R. Sibley, Melissa Truong, Caitlin R. Wolf, Karen Cowgill, Stephanie Schrag, Jeff Duchin, Michael Boeckh, Janet A. Englund, Michael Famulare, Barry R. Lutz, Mark J. Rieder, Lea M. Starita, Matthew Thompson, Helen Y. Chu, Trevor Bedford, Jay Shendure                                                                                                                                            |
| EPI_ISL_530555, EPI_ISL_530600, EPI_ISL_532179, EPI_ISL_532442 | Lighthouse Lab in Glasgow                                                                                | Wellcome Sanger Institute for the COVID-19 Genomics UK (COG-UK) consortium | Harper VanSteenhouse, Yumi Kasai, David Gray, Carol Clugston, Anna Dominiczak and Alex Alderton, Roberto Amato, Sonia Goncalves, Ewan Harrison, David K. Jackson, Ian Johnston, Dominic Kwiatkowski, Cordelia Langford, John Sillitoe                                                                                                                                                                                                                                                                                                                                                            |
| EPI_ISL_532506                                                 | NHSGGC West of Scotland Specialist Virology Centre / MRC-University of Glasgow Centre for Virus Research | Wellcome Sanger Institute for the COVID-19 Genomics UK (COG-UK) consortium | Ana da Silva Filipe, Natasha Johnson, Kathy Smollett, Daniel Mair, Stephen Carmichael, Lily Tong, Jenna Nichols, Elihu Aranday-Cortes, Kirstyn Brunker, Yasmin Parr, Kyriaki Nomikou; Sarah McDonald, Marc Niebel, Patawee Asamaphan; Richard Orton, Joseph Hughes, Sreenu Vattipally, David L. Robertson; Alasdair MacLean, Rory Gunson; Kathy Li, Natasha Jesudason, Rajiv Shah, James Shepherd, Antonia Ho, Alice Broos, Emma Thomson and Alex Alderton, Roberto Amato, Sonia Goncalves, Ewan Harrison, David K. Jackson, Ian Johnston, Dominic Kwiatkowski, Cordelia Langford, John Sillitoe |
| EPI_ISL_533305                                                 | Lighthouse Lab in Glasgow                                                                                | Wellcome Sanger Institute for the COVID-19 Genomics UK (COG-UK) consortium | Harper VanSteenhouse, Yumi Kasai, David Gray, Carol Clugston, Anna Dominiczak and Alex Alderton, Roberto Amato, Sonia Goncalves, Ewan Harrison, David K. Jackson, Ian Johnston, Dominic Kwiatkowski, Cordelia Langford, John Sillitoe                                                                                                                                                                                                                                                                                                                                                            |
| EPI_ISL_534247                                                 | Universitetssjukhuset i Linköping                                                                        | The Public Health Agency of Sweden                                         | Anna-Malin Linde, Maria Lind Karlberg, Mattias Haukland, Reza Advani, Olov Svartstrom, Oskar Karlsson Lindsjo, Sandra Broddesson, Petra Edquist, Mia Brytting, Anna Risberg, Karin Tegmark-Wisell                                                                                                                                                                                                                                                                                                                                                                                                |
| EPI_ISL_538114                                                 | Clínica Universidad de Navarra. Servicio de Enfermedades Infecciosas y Microbiología clínica             | SeqCOVID-SPAIN consortium/IBV(CSIC)                                        | Mirían Fernández-Alonso, Jose Luis del Pozo and SeqCOVID-SPAIN consortium                                                                                                                                                                                                                                                                                                                                                                                                                                                                                                                        |
| EPI_ISL_538448                                                 | Department of Laboratory Medicine, Tan Tock Seng Hospital                                                | Department of Laboratory Medicine, Tan Tock Seng Hospital                  | Chen YYC, Zair X, Lim JX, Li C, Tang WY, Maurer-Stroh S, Barkham TMS, Nagarajan N, Sessions OM                                                                                                                                                                                                                                                                                                                                                                                                                                                                                                   |
| EPI_ISL_539267                                                 | Hospital Universitario de La Ribera (Alzira, València)                                                   | SeqCOVID-SPAIN consortium/IBV(CSIC)                                        | Olalla Martínez Macias, Julia González and SeqCOVID-SPAIN consortium                                                                                                                                                                                                                                                                                                                                                                                                                                                                                                                             |
| EPI_ISL_539471                                                 | Viollier AG                                                                                              | Department of Biosystems Science and Engineering, ETH Zürich               | Christian Beisel, Sarah Nadeau, Ivan Topolsky, Pedro Ferreira, Philipp Jablonski, Susana Posada-Céspedes, Tobias Schär, Ina Nissen, Natascha Santacrose, Elodie Burcklen, Christiane Beckmann, Maurice Redondo, Olivier Kobel, Christoph Noppen, Sophie Seidel, Noemie Santamaria de Souza, Niko Beerenwinkel, Tanja Stadler                                                                                                                                                                                                                                                                     |
| EPI_ISL_539490                                                 | Civil Hospital, Rupnagar                                                                                 | CSIR-Institute of Microbial Technology                                     | Kanika Bansal, Sanjeet Kumar, Anu Singh, Debarghya Ghose, Amandeep Kaur, Rajesh Kumar Mishra, Poushali Chakraborty, Harsh Goar, Navin Baid, Ashwani Kumar, Dipak Dutta, Sanjeev Khosla, Prabhu B. Patil                                                                                                                                                                                                                                                                                                                                                                                          |
| EPI_ISL_539851                                                 | Pok Oi Hospital                                                                                          | Hong Kong Department of Health                                             | Alan K.L. Tsang, Peter C.W. Yip, Edman T.K. Lam, Rickjason C.W. Chan, Dominic N.C. Tsang                                                                                                                                                                                                                                                                                                                                                                                                                                                                                                         |
| EPI_ISL_539881                                                 | Kungsbacka Narakut                                                                                       | The Public Health Agency of Sweden                                         | Anna-Malin Linde, Maria Lind Karlberg, Oskar Karlsson Lindsjo, Olov Svartstrom, Mattias Haukland, Reza Advani, Sandra Broddesson, Anna Risberg, Theresa Enkirch, Mia Brytting, Karin Tegmark-Wisell                                                                                                                                                                                                                                                                                                                                                                                              |
| EPI_ISL_540196                                                 | Lighthouse Lab in Glasgow                                                                                | Wellcome Sanger Institute for the COVID-19 Genomics UK (COG-UK) consortium | Harper VanSteenhouse, Yumi Kasai, David Gray, Carol Clugston, Anna Dominiczak and Alex Alderton, Roberto Amato, Sonia Goncalves, Ewan Harrison, David K. Jackson, Ian Johnston, Dominic Kwiatkowski, Cordelia Langford, John Sillitoe on behalf of the Wellcome Sanger Institute COVID-19 Surveillance Team                                                                                                                                                                                                                                                                                      |
| EPI_ISL_540550                                                 | Department of Clinical Microbiology                                                                      | GIGA Medical Genomics                                                      | Keith Durkin, Maria Artesi, Sébastien Bontems, Raphaël Boreux, Bouchra Boujemla, Cécile Meex, Axelle Chaslain, Céline Fombellida-Lopez, Pierrette Melin, Marie-Pierre Hayette, Vincent Bours                                                                                                                                                                                                                                                                                                                                                                                                     |
| EPI_ISL_540969, EPI_ISL_540980                                 | Laboratorio de Referencia Nacional de Virus Respiratorios, Instituto Nacional de Salud Peru              | Laboratorio de Genómica Microbiana, Universidad Peruana Cayetano Heredia   | Pablo Tsukayama, Alejandra Dávila-Barclay, Luis González, Pedro E. Romero, Brenda Ayzanoa, Janet Huancachoque, Pool Marcos, Maribel Huaringa, Camila Castillo-Vilcahuaman, Guillermo Salvatierra                                                                                                                                                                                                                                                                                                                                                                                                 |
| EPI_ISL_541785                                                 | Lighthouse Lab in Glasgow                                                                                | Wellcome Sanger Institute for the COVID-19 Genomics UK (COG-UK) consortium | Harper VanSteenhouse, Yumi Kasai, David Gray, Carol Clugston, Anna Dominiczak and Alex Alderton, Roberto Amato, Sonia Goncalves, Ewan Harrison, David K. Jackson, Ian Johnston, Dominic Kwiatkowski, Cordelia Langford, John Sillitoe on behalf of the Wellcome Sanger Institute COVID-19 Surveillance Team                                                                                                                                                                                                                                                                                      |
| EPI_ISL_542265                                                 | ASST GOM Niguarda                                                                                        | Dep. Of Oncology and Hemato-Oncology University of Milan                   | Claudia Alteri, Valeria Cento, Antonio Piralla, Valentino Costabile, Monica Tallarita, Luna Colagrossi, Silvia Renica, Federica Giardina, Federica Novazzi, Stefano Gaiarsa, Elisa Matarazzo, Maria Antonello, Chiara Vismara, Roberto Fumagalli, Oscar Massimiliano Epis, Massimo Puoti, Carlo Federico Perno, Fausto Baldanti                                                                                                                                                                                                                                                                  |
| EPI_ISL_542389                                                 | San Matteo Hospital Pavia                                                                                | Dep. Of Oncology and Hemato-Oncology University of Milan                   | Claudia Alteri, Valeria Cento, Antonio Piralla, Valentino Costabile, Monica Tallarita, Luna Colagrossi, Silvia Renica, Federica Giardina, Federica Novazzi, Stefano Gaiarsa, Elisa Matarazzo, Maria Antonello, Chiara Vismara, Roberto Fumagalli, Oscar Massimiliano Epis, Massimo Puoti, Carlo Federico Perno, Fausto Baldanti                                                                                                                                                                                                                                                                  |
| EPI_ISL_542545, EPI_ISL_544240, EPI_ISL_546893                 | Houston Methodist Hospital                                                                               | Houston Methodist Hospital                                                 | S. Wesley Long, Randall J. Olsen, Paul A. Christensen, David W. Bernard, James J. Davis, Maulik Shukla, Marcus Nguyen, Matthew Ojeda Saaveda, Concepcion C. Cantu, Prasanti Yerramilli, Layne Pruitt, Sishir Subedi, Hung-Che Kuo, Heather Hendrickson, Ghazaleh Eskandari, Hoang A. T. Nguyen, J. Hunter Long, Muthiah Kumaraswami, Jule Goike, Daniel Boutz, Jimmy Gollihar, Jason S. McLellan, Chia-Wei Chou, Kamyab Javanmardi, Ilya J. Finkelstein, and James M. Musser                                                                                                                     |
| EPI_ISL_547506                                                 | Dutch COVID-19 response team                                                                             | National Institute for Public Health and the Environment (RIVM)            | Adam Meijer, Harry Vennema, Jeroen Cremer, Sharon van den Brink, Bas van der Veer, AnneMarie van den Brandt, Florian Zwagemaker, Dennis Schmitz, Chantal Reusken, on behalf of the national COVID-19 response team                                                                                                                                                                                                                                                                                                                                                                               |
| EPI_ISL_548211                                                 | Laboratoire de Virologie, HUG                                                                            | Swiss National Reference Centre for Influenza                              | LAUBSCHER F.                                                                                                                                                                                                                                                                                                                                                                                                                                                                                                                                                                                     |
| EPI_ISL_548248                                                 | Ostersund klinisk mikrobiologi                                                                           | The Public Health Agency of Sweden                                         | Anna-Malin Linde, Maria Lind Karlberg, Mattias Haukland, Reza Advani, Olov Svartstrom, Oskar Karlsson Lindsjo, Sandra Broddesson, Petra Edquist, Mia Brytting, Anna Risberg, Karin Tegmark-Wisell                                                                                                                                                                                                                                                                                                                                                                                                |
| EPI_ISL_548901                                                 | Public Health Ontario Laboratory                                                                         | Public Health Ontario Laboratory                                           | Vanessa G Allen, Philip Banh, Richard de Borja, Yao Chen, Alireza Eshaghi, Nahuel Fittipaldi, Christine Frantz, Jonathan B Gubbay, Jennifer L Guthrie, Lawrence Heisler, Esha Joshi, Michael Laszloffy, Aimin Li, Michael CY Li, Dean Maxwell, Sandeep Nagra, Samir N Patel, Heather Rilkoof, Jared Simpson, Karthikeyan Sivaraman, Yogi Sundaravadanam, Sarah Teatero, Andre Villegas, Sandra Zittermann                                                                                                                                                                                        |
| EPI_ISL_548946                                                 | Institute of Microbiology, University of Veterinary and Animal sciences                                  | Institute of Microbiology, University of Veterinary and Animal sciences    | Yaqub.T., Nawaz.M., Ali.M.A., Altaf.I., Raza.S., Shabbir.M.A., Ashraf.M.A., Aziz.S.Z., Cheema.S.Q., Shah.M.B., Hassan.S., Rafique.S., Sardar.N., Mehmood.A., Aziz.M.W., Fazal.S., Khan.N., Khan.M.T., Attique.M.M., Asif.A., Anwar.M., Awan.N.A., Younis.M.U., Bhatti.M.A., Tahir.Z., Mukhtar.N., Sarwar.H., Rana.M.S., Shabbir.M.Z.                                                                                                                                                                                                                                                             |
| EPI_ISL_553937                                                 | Lighthouse Lab in Alderley Park                                                                          | Wellcome Sanger Institute for the COVID-19 Genomics UK (COG-UK) consortium | The Lighthouse Lab in Alderley Park and Alex Alderton, Roberto Amato, Sonia Goncalves, Ewan Harrison, David K. Jackson, Ian Johnston, Dominic Kwiatkowski, Cordelia Langford, John Sillitoe on behalf of the Wellcome Sanger Institute COVID-19 Surveillance Team ( <a href="http://www.sanger.ac.uk/covid-team">http://www.sanger.ac.uk/covid-team</a> )                                                                                                                                                                                                                                        |
| EPI_ISL_554142                                                 | Lighthouse Lab in Milton Keynes                                                                          | Wellcome Sanger Institute for the COVID-19 Genomics UK (COG-UK) consortium | The Lighthouse Lab in Alderley Park and Alex Alderton, Roberto Amato, Sonia Goncalves, Ewan Harrison, David K. Jackson, Ian Johnston, Dominic Kwiatkowski, Cordelia Langford, John Sillitoe on behalf of the Wellcome Sanger Institute COVID-19 Surveillance Team                                                                                                                                                                                                                                                                                                                                |
| EPI_ISL_554938                                                 | Lighthouse Lab in Alderley Park                                                                          | Wellcome Sanger Institute for the COVID-19 Genomics UK (COG-UK) consortium | The Lighthouse Lab in Alderley Park and Alex Alderton, Roberto Amato, Sonia Goncalves, Ewan Harrison, David K. Jackson, Ian Johnston, Dominic Kwiatkowski, Cordelia Langford, John Sillitoe on behalf of the Wellcome Sanger Institute COVID-19 Surveillance Team ( <a href="http://www.sanger.ac.uk/covid-team">http://www.sanger.ac.uk/covid-team</a> )                                                                                                                                                                                                                                        |
| EPI_ISL_555510                                                 | Lighthouse Lab in Alderley Park                                                                          | Wellcome Sanger Institute for the COVID-19 Genomics UK Consortium          | The Lighthouse Lab in Alderley Park and Alex Alderton, Roberto Amato, Sonia Goncalves, Ewan Harrison, David K. Jackson, Ian Johnston, Dominic Kwiatkowski, Cordelia Langford, John Sillitoe on behalf of the Wellcome Sanger Institute COVID-19 Surveillance Team                                                                                                                                                                                                                                                                                                                                |
| EPI_ISL_556038, EPI_ISL_556592, EPI_ISL_556610                 | Lighthouse Lab in Alderley Park                                                                          | Wellcome Sanger Institute for the COVID-19 Genomics UK (COG-UK) consortium | The Lighthouse Lab in Alderley Park and Alex Alderton, Roberto Amato, Sonia Goncalves, Ewan Harrison, David K. Jackson, Ian Johnston, Dominic Kwiatkowski, Cordelia Langford, John Sillitoe on behalf of the Wellcome Sanger Institute COVID-19 Surveillance Team ( <a href="http://www.sanger.ac.uk/covid-team">http://www.sanger.ac.uk/covid-team</a> )                                                                                                                                                                                                                                        |
| EPI_ISL_557002                                                 | Lighthouse Lab in Alderley Park                                                                          | Wellcome Sanger Institute for the COVID-19 Genomics UK Consortium          | The Lighthouse Lab in Alderley Park and Alex Alderton, Roberto Amato, Sonia Goncalves, Ewan Harrison, David K. Jackson, Ian Johnston, Dominic Kwiatkowski, Cordelia Langford, John Sillitoe on behalf of the Wellcome Sanger Institute COVID-19 Surveillance Team                                                                                                                                                                                                                                                                                                                                |
| EPI_ISL_557211, EPI_ISL_557290, EPI_ISL_557848                 | Lighthouse Lab in Milton Keynes                                                                          | Wellcome Sanger Institute for the COVID-19 Genomics                        | The Lighthouse Lab in Milton Keynes and Alex Alderton, Roberto Amato, Sonia Goncalves, Ewan Harrison, David K. Jackson, Ian Johnston, Dominic                                                                                                                                                                                                                                                                                                                                                                                                                                                    |

|                                                                |                                                                                                                                         |                                                                                                                                                       |                                                                                                                                                                                                                                                                                                                                                                                                                                                                                                                                                                                                                                                                                                                                                                                                                                                             |
|----------------------------------------------------------------|-----------------------------------------------------------------------------------------------------------------------------------------|-------------------------------------------------------------------------------------------------------------------------------------------------------|-------------------------------------------------------------------------------------------------------------------------------------------------------------------------------------------------------------------------------------------------------------------------------------------------------------------------------------------------------------------------------------------------------------------------------------------------------------------------------------------------------------------------------------------------------------------------------------------------------------------------------------------------------------------------------------------------------------------------------------------------------------------------------------------------------------------------------------------------------------|
|                                                                |                                                                                                                                         | UK (COG-UK) consortium                                                                                                                                | Kwiatkowski, Cordelia Langford, John Sillitoe on behalf of the Wellcome Sanger Institute COVID-19 Surveillance Team ( <a href="http://www.sanger.ac.uk/covid-team">http://www.sanger.ac.uk/covid-team</a> )                                                                                                                                                                                                                                                                                                                                                                                                                                                                                                                                                                                                                                                 |
| EPI_ISL_558115, EPI_ISL_558138, EPI_ISL_558828, EPI_ISL_559262 | Lighthouse Lab in Alderley Park                                                                                                         | Wellcome Sanger Institute for the COVID-19 Genomics UK (COG-UK) consortium                                                                            | The Lighthouse Lab in Alderley Park and Alex Alderton, Roberto Amato, Sonia Goncalves, Ewan Harrison, David K. Jackson, Ian Johnston, Dominic Kwiatkowski, Cordelia Langford, John Sillitoe on behalf of the Wellcome Sanger Institute COVID-19 Surveillance Team                                                                                                                                                                                                                                                                                                                                                                                                                                                                                                                                                                                           |
| EPI_ISL_559730                                                 | Lighthouse Lab in Milton Keynes                                                                                                         | Wellcome Sanger Institute for the COVID-19 Genomics UK (COG-UK) consortium                                                                            | The Lighthouse Lab in Milton Keynes and Alex Alderton, Roberto Amato, Sonia Goncalves, Ewan Harrison, David K. Jackson, Ian Johnston, Dominic Kwiatkowski, Cordelia Langford, John Sillitoe on behalf of the Wellcome Sanger Institute COVID-19 Surveillance Team ( <a href="http://www.sanger.ac.uk/covid-team">http://www.sanger.ac.uk/covid-team</a> )                                                                                                                                                                                                                                                                                                                                                                                                                                                                                                   |
| EPI_ISL_561324                                                 | MRCG at LSHTM Genomics lab                                                                                                              | MRCG at LSHTM Genomics lab                                                                                                                            | Abdul Karim sesay, Abdoulie Kante, Jarra Manneh, Mariama Kujabi, Bakary Sanyang                                                                                                                                                                                                                                                                                                                                                                                                                                                                                                                                                                                                                                                                                                                                                                             |
| EPI_ISL_561364                                                 | Centre for Clinical Infection and Diagnostics Research and Genomics Innovation Unit, Guy's and St. Thomas' NHS Trust                    | Centre for Clinical Infection and Diagnostics Research and Genomics Innovation Unit, Guy's and St. Thomas' NHS Trust                                  | Chloe Fisher, Luke Snell, Rahul Batra, Jonathan Edgeworth, Ali Raza Awan                                                                                                                                                                                                                                                                                                                                                                                                                                                                                                                                                                                                                                                                                                                                                                                    |
| EPI_ISL_568544                                                 | Laboratorio de Referencia Nacional de Virus Respiratorios, Instituto Nacional de Salud Peru                                             | Laboratorio de Genómica Microbiana, Universidad Peruana Cayetano Heredia                                                                              | Pablo Tsukayama, Alejandra Dávila-Barclay, Luis González, Pedro E. Romero, Brenda Ayzano, Janet Huancachoque, Pool Marcos, Maribel Huaranga, Camila Castiño-Vicahuaman, Guillermo Salvatierra                                                                                                                                                                                                                                                                                                                                                                                                                                                                                                                                                                                                                                                               |
| EPI_ISL_568558                                                 | Department of Infectious Diseases and Immunology, National Hospital Organization Nagoya Medical Center                                  | Clinical Research Center, National Hospital Organization Nagoya Medical Center                                                                        | Yoshihiro Nakata, Hirotaka Ode, Mai Kubota, Masakazu Matsuda, Kazuhiro Matsuoka, Nakasuji Miho, Mikiko Mori, Mayumi Imahashi, Yoshiyuki Yokomaku, Yasumasa Iwatani                                                                                                                                                                                                                                                                                                                                                                                                                                                                                                                                                                                                                                                                                          |
| EPI_ISL_568585                                                 | Ramathibodi Hospital                                                                                                                    | COVID-19 Network Investigations (CONI) Alliance                                                                                                       | Elizabeth Batty, Wasun Chantratita, Thanat Chookajorn, Stefan Fernandez, Angkana Huang, Anthony R. Jones, Khajohn Joonsalak, Chonticha Klungtong, Theerarat Kochakarn, Namfon Kotanan, Krittikorn Kumpornsin, Wuditchai Manasatienkij, Bhakthoom Panthan, Ekawat Pasomsub, Kingkan Rakmanee, Insee Semsorn, Janjira Thaipadungant, Arporn Wangwiwatsin, Treewat Watthanachockchai                                                                                                                                                                                                                                                                                                                                                                                                                                                                           |
| EPI_ISL_569262                                                 | MEPHI, Aix Marseille University                                                                                                         | MEPHI, Aix Marseille University                                                                                                                       | Anthony LEVASSEUR                                                                                                                                                                                                                                                                                                                                                                                                                                                                                                                                                                                                                                                                                                                                                                                                                                           |
| EPI_ISL_569750, EPI_ISL_569784, EPI_ISL_569796                 | Omsk Research Institute of Natural Focal Infections                                                                                     | WHO National Influenza Centre Russian Federation                                                                                                      | Artem Fadeev, Ekaterina Gradoboeva, Ekaterina Savkina, Daria Nashatyayeva, Elena Poleshchuk, Aleksei Vasilenko, Valery Yakimenko, Andrey Komissarov                                                                                                                                                                                                                                                                                                                                                                                                                                                                                                                                                                                                                                                                                                         |
| EPI_ISL_569952, EPI_ISL_569968                                 | Unity Health Toronto                                                                                                                    | Ontario Institute for Cancer Research                                                                                                                 | Ramzi Fattouh, Larissa M. Matukas, Yan Chen, Mark Downing, Trina Otterman, Karel Boissinot, Wai Sum Siu, Zhi Cui, Le Luu, Samira Mubareka, TIBDN, Ilinca Lungu, Bernard Lam, Jeremy Johns, Paul Krzyzanowski, Richard de Borja, Felicia Vincelli, Philip Zuzarte, Jared T. Simpson                                                                                                                                                                                                                                                                                                                                                                                                                                                                                                                                                                          |
| EPI_ISL_572295                                                 | Virginia DCLS                                                                                                                           | Virginia DCLS                                                                                                                                         | Virginia DCLS                                                                                                                                                                                                                                                                                                                                                                                                                                                                                                                                                                                                                                                                                                                                                                                                                                               |
| EPI_ISL_572333                                                 | Institute for Virology, University Hospital Duesseldorf, Medical Faculty, Heinrich-Heine-University Duesseldorf                         | Institute for Virology, University Hospital Duesseldorf, Medical Faculty, Heinrich-Heine-University Duesseldorf                                       | Maximilian Damagnez, Verena Keitel, Björn Jensen, Nadine Lübke, Lisa Müller, Philipp Ostermann, Tina Senff, Ortwin Adams, Philipp Albrecht, Gerald Antoch, Johannes Bode, Edwin Böлке, Saskia Elben, Torsten Feldt, Johannes C. Fischer, , Anselm Kunstein, Caroline Kündt, Alexander Killer, Tom Lüdde, Annemarie Mohring, Jennifer Neubert, Heiner Schaal, Ansgar Schultz, Jörg Timm, Andreas Walker                                                                                                                                                                                                                                                                                                                                                                                                                                                      |
| EPI_ISL_572334, EPI_ISL_572390, EPI_ISL_572391, EPI_ISL_572393 | LACEN/PE                                                                                                                                | WallauLab, Aggeu Magalhaes Institute                                                                                                                  | Marcelo Henrique Santos Paiva, Duschinka Ribeiro Duarte Guedes, Cássia Docena, Mathheus Figueira Bezerra, Filipe Zimmer Dezordi, Laís Ceschini Machado, Larissa Krokovskiy, Elisama Helvecio, Alexandre Freitas da Silva, Luydson Richardson Silva Vasconcelos, Antonio Mauro Rezende, Severino Jefferson Ribeiro da Silva, Kamila Gaudêncio da Silva Sales, Bruna Santos Lima Figueiredo de Sá, Dercliano Lopes da Cruz, Claudio Eduardo Cavalcanti, Armando de Menezes Neto, Caroline Targino Alves da Silva, Renata Pessôa Germano Mendes, Maria Almerice Lopes da Silva, Tiago Gräf, Paola Cristina Resende, Gonzalo Belloú, Michelle da Silva Barros, Wheverton Ricardo Correia do Nascimento, , Rodrigo Moraes Loyo Arcoverde, Luciane Caroline Albuquerque Bezerra, Sival Pinto Brandão Filho, Constância Flávia Junqueira Ayres, Gabriel Luz Wallau |
| EPI_ISL_573152                                                 | Institute for Virology, University Hospital Duesseldorf, Medical Faculty, Heinrich-Heine-University Duesseldorf                         | Institute for Virology, University Hospital Duesseldorf, Medical Faculty, Heinrich-Heine-University Duesseldorf                                       | Maximilian Damagnez, Verena Keitel, Björn Jensen, Nadine Lübke, Lisa Müller, Philipp Ostermann, Tina Senff, Ortwin Adams, Philipp Albrecht, Gerald Antoch, Johannes Bode, Edwin Böлке, Saskia Elben, Torsten Feldt, Johannes C. Fischer, , Anselm Kunstein, Caroline Kündt, Alexander Killer, Tom Lüdde, Annemarie Mohring, Jennifer Neubert, Heiner Schaal, Ansgar Schultz, Jörg Timm, Andreas Walker                                                                                                                                                                                                                                                                                                                                                                                                                                                      |
| EPI_ISL_574933                                                 | Viollier AG                                                                                                                             | Department of Biosystems Science and Engineering, ETH Zürich                                                                                          | Christian Beisel, Sarah Nadeau, Ivan Topolsky, Pedro Ferreira, Philipp Jablonski, Susana Posada-Céspedes, Tobias Schär, Ina Nissen, Natascha Santacrose, Elodie Burcklen, Christiane Beckmann, Maurice Redondo, Olivier Kobel, Christoph Noppen, Sophie Seidel, Noemie Santamaria de Souza, Niko Beerenwinkel, Tanja Stadler                                                                                                                                                                                                                                                                                                                                                                                                                                                                                                                                |
| EPI_ISL_576148                                                 | Department of Respiratory & Other Viral Infections of L.V. Gromashevsky Institute of Epidemiology & Infectious Diseases NAMS of Ukraine | Department of Respiratory & Other Viral Infections of L.V. Gromashevsky Institute of Epidemiology & Infectious Diseases NAMS of Ukraine, JSC "Farnak" | Alla Mironenko, Ihor Kravchuk, Liudmyla Bolotova, Larysa Radchenko, Nataliia Teteriuk                                                                                                                                                                                                                                                                                                                                                                                                                                                                                                                                                                                                                                                                                                                                                                       |
| EPI_ISL_577742                                                 | Institute of Virology, Biomedical Research Center of the Slovak Academy of Sciences, Bratislava                                         | Faculty of Natural Sciences, Comenius University, Bratislava                                                                                          | Broa Brejová, Viktória Hodorová, Kristína Boršová, Viktória abanová, Dominika Friová, Sabina Fumaová Havílková, Juraj Kopáek, Martina Liková, ubomíra Lukáiková, Martina Neboháová, Monika Slávková, Edit Starová, Elena Tichá, Tomáš Vina, Jozef Nosek, Boris Klempa                                                                                                                                                                                                                                                                                                                                                                                                                                                                                                                                                                                       |
| EPI_ISL_579415, EPI_ISL_579425                                 | LabPLUS                                                                                                                                 | Institute of Environmental Science and Research (ESR)                                                                                                 | Xiaoyun Ren, Matt Storey, Nikki Freed, Muhammad Faisal, Jing Wang, Hermes Perez, Anja Werno, Antje van der Linden, Arlo Upton, Chris Mansell, David Hammer, Dragana Drinkovic, Gary McAuliffe, Hana Sofia Andersson, James Ussher, Jill Sherwood, Josh Freeman, Antonia Howard, Juliet Elvy, Mary DeAlmeida, Matt Blakiston, Matthew Rogers, Max Bloomfield, Michael Addidle, Michelle Balm, Sally Roberts, Sarah Jefferies, Sharmini Muttaiyah, Susan Morpeth, Susan Taylor, Timothy Blackmore, Vani Sathyendran, Veronica Playle, Virginia Hope, Erasmus Smit, Lauren Jelly, Olin Silander, Joep de Ligt                                                                                                                                                                                                                                                  |
| EPI_ISL_581588                                                 | Department of Clinical Microbiology                                                                                                     | GIGA Medical Genomics                                                                                                                                 | Keith Durkin, Maria Artesi, Sébastien Bontems, Raphaël Boreux, Bouchra Boujemla, Cécile Meex, Pierrette Melin, Marie-Pierre Hayette, Vincent Bours                                                                                                                                                                                                                                                                                                                                                                                                                                                                                                                                                                                                                                                                                                          |
| EPI_ISL_581916                                                 | University Hospital Basel, Clinical Virology                                                                                            | University Hospital Basel, Clinical Bacteriology                                                                                                      | Madlen Stange, Alfredo Mari, Tim Roloff, Helena MB Seth-Smith, Michael Schweitzer, Myrta Brunner, Karoline Leuzinger, Kirstine K. Soegaard, Alexander Gensch, Sarah Tschudin-Sutter, Simon Fuchs, Julia Bielicki, Hans Pargger, Martin Siegemund, Christian Nickel, Roland Bingisser, Michael Osthoff, Stefano Bassetti, Rita Schneider-Sliwa, Manuel Bategay, Hans Hirsch, Adrian Egli                                                                                                                                                                                                                                                                                                                                                                                                                                                                     |
| EPI_ISL_583052                                                 | Humboldt County Public Health Laboratory                                                                                                | Chan-Zuckerberg Biohub                                                                                                                                | CZB Cliahub Consortium                                                                                                                                                                                                                                                                                                                                                                                                                                                                                                                                                                                                                                                                                                                                                                                                                                      |
| EPI_ISL_583879                                                 | Center for Virology, Medical University of Vienna                                                                                       | Bergthaler laboratory, CeMM Research Center for Molecular Medicine of the Austrian Academy of Sciences                                                | Alexandra Popa, Benedikt Agerer, Henrique Colaco, Lukas Endler, Jakob-Wendelin Genger, Alexander Lercher, Mark Smyth, Thomas Penz, Michael Schuster, Jan Laine, Martin Senekowitsch, Judith Aberle, Stephan Aberle, Peter Huftnagl, Daniela Schmid, Franz Algenberger, Elisabeth Puchhammer-Stoeckl, Manfred Nairz, Guenter Weiss, Gregor Hörmann, Kinga Rigler-Hohenwarter, Rainer Gattlinger, Weller Borena, Dorothee von Laer, Gernot Walder, Peter Obrist, Christian Paar, Sabine Susstiz-Rack, Gunther Vogl, Adi Steinrigl, Christoph Bock, Andreas Bergthaler                                                                                                                                                                                                                                                                                         |
| EPI_ISL_584483, EPI_ISL_584589                                 | UHCW / University of Warwick                                                                                                            | COVID-19 Genomics UK (COG-UK) Consortium                                                                                                              | Richard Stark, Chrystala Constantinidou, Meera Unnikrishnan, Laura Baxter, Jeff Cheng, Grace Taylor-Joyce, Hannah Elizabeth Bridgewater, Lucy Frost, Sarojini Pandey, Paul Brown, Tauqeer Alam, Sascha Ott, Dimitris Grammatopoulos                                                                                                                                                                                                                                                                                                                                                                                                                                                                                                                                                                                                                         |
| EPI_ISL_585178                                                 | Regional Virus Laboratory, Belfast Health and Social Care Trust                                                                         | COVID-19 Genomics UK (COG-UK) Consortium                                                                                                              | Conall McCaughey, James McKenna, Tanya Curran, Susan Feeney, Alison Watt, Ciara Cox, Mairead Connor, Zoltan Molnar, David Simpson, Derek Fairley                                                                                                                                                                                                                                                                                                                                                                                                                                                                                                                                                                                                                                                                                                            |
| EPI_ISL_586421                                                 | Toronto Invasive Bacterial Diseases Network                                                                                             | McMaster University                                                                                                                                   | Allison McGeer, Patryk Aftanas, Hooman Derakhshani, Angel Li, Kuganya Nirmalarajah, Emily Panousis, Ahmed Draia, Jalees Nasir, Michael Surette, Samira Mubareka, Andrew G. McArthur                                                                                                                                                                                                                                                                                                                                                                                                                                                                                                                                                                                                                                                                         |
| EPI_ISL_588845                                                 | Lighthouse Lab in Glasgow                                                                                                               | Wellcome Sanger Institute for the COVID-19 Genomics UK Consortium                                                                                     | Harper VanSteenhouse, Yumi Kasai, David Gray, Carol Clugston, Anna Dominiczak and Alex Alderton, Roberto Amato, Sonia Goncalves, Ewan Harrison, David K. Jackson, Ian Johnston, Dominic Kwiatkowski, Cordelia Langford, John Sillitoe on behalf of the Wellcome Sanger Institute COVID-19 Surveillance Team                                                                                                                                                                                                                                                                                                                                                                                                                                                                                                                                                 |
| EPI_ISL_589421                                                 | Lighthouse Lab in Alderley Park                                                                                                         | Wellcome Sanger Institute for the COVID-19 Genomics UK (COG-UK) consortium                                                                            | Jacquelyn Wynn, Mairead Hyland, The Lighthouse Lab in Alderley Park and Alex Alderton, Roberto Amato, Sonia Goncalves, Ewan Harrison, David K. Jackson, Ian Johnston, Dominic Kwiatkowski, Cordelia Langford, John Sillitoe on behalf of the Wellcome Sanger Institute COVID-19 Surveillance Team                                                                                                                                                                                                                                                                                                                                                                                                                                                                                                                                                           |
| EPI_ISL_590252                                                 | Lighthouse Lab in Glasgow                                                                                                               | Wellcome Sanger Institute for the COVID-19 Genomics UK (COG-UK) consortium                                                                            | Harper VanSteenhouse, Yumi Kasai, David Gray, Carol Clugston, Anna Dominiczak and Alex Alderton, Roberto Amato, Sonia Goncalves, Ewan Harrison, David K. Jackson, Ian Johnston, Dominic Kwiatkowski, Cordelia Langford, John Sillitoe on behalf of the Wellcome Sanger Institute COVID-19 Surveillance Team ( <a href="http://www.sanger.ac.uk/covid-team">http://www.sanger.ac.uk/covid-team</a> )                                                                                                                                                                                                                                                                                                                                                                                                                                                         |
| EPI_ISL_590695                                                 | INMI Lazzaro Spallanzani IRCCS                                                                                                          | INMI Lazzaro Spallanzani IRCCS                                                                                                                        | Cesare E.M. Gruber, Francesco Messina, Barbara Bartolini, Martina Rueca, Emanuela Giombini, Beatrice Valli, Eleonora Lalle, Simone Lanini, Francesco Vairo, Antonino Di Caro, Maria R. Capobianchi                                                                                                                                                                                                                                                                                                                                                                                                                                                                                                                                                                                                                                                          |

|                                |                                                                                                                                                        |                                                                                        |                                                                                                                                                                                                                                                                                                                                                                                                                                                                          |
|--------------------------------|--------------------------------------------------------------------------------------------------------------------------------------------------------|----------------------------------------------------------------------------------------|--------------------------------------------------------------------------------------------------------------------------------------------------------------------------------------------------------------------------------------------------------------------------------------------------------------------------------------------------------------------------------------------------------------------------------------------------------------------------|
| EPI_ISL_591466                 | Pathogen Genomics Center, National Institute of Infectious Diseases                                                                                    | Pathogen Genomics Center, National Institute of Infectious Diseases                    | Tsuyoshi Sekizuka, Kentaro Itokawa, Rina Tanaka, Masanori Hashino, Makoto Kuroda                                                                                                                                                                                                                                                                                                                                                                                         |
| EPI_ISL_594118                 | Centro de Investigaciones, Universidad de Especialidades Espíritu Santo                                                                                | Institute of Microbiology, Universidad San Francisco de Quito                          | Derly Andrade, Juan Carlos Fernandez, Belén Prado-Vivar, Sully Márquez, Juan José Guadalupe, Monica Becerra-Wong, Bernardo Gutiérrez, Gabriel Morey, Ruben Armas, Jose Pedro Barberan, Fernando Espinoza, Edith Lopez, Verónica Barragan, Patricio Rojas-Silva, Gabriel Trueba, Michelle Grunauer, Paúl Cárdenas                                                                                                                                                         |
| EPI_ISL_596303                 | HELIX LCC                                                                                                                                              | WHO National Influenza Centre Russian Federation                                       | Andrey Komissarov, Artem Fadeev, Anna Ivanova, Kseniya Komissarova, Dmitry Bazhenov, Daria Danilenko                                                                                                                                                                                                                                                                                                                                                                     |
| EPI_ISL_596405                 | Seattle Flu Study                                                                                                                                      | Seattle Flu Study                                                                      | Deborah A. Nickerson, Chris D. Frazier, Jover Lee, Benjamin Pelle, Matthew Richardson, Amanda Adler, Elisabeth Brandtetter, Peter D. Han, Kairsten Fay, Misja Ilcin, Kirsten Lacombe, Thomas R. Sibley, Melissa Truong, Caitlin R. Wolf, Karen Cowgill, Stephanie Schrag, Jeff Duchin, Michael Boeckh, Janet A. Englund, Michael Famulare, Barry R. Lutz, Mark J. Rieder, Lea M. Starita, Matthew Thompson, Helen Y. Chu, Trevor Bedford, Jay Shendure                   |
| EPI_ISL_596458                 | National Public Health Laboratory, National Centre for Infectious Diseases                                                                             | National Public Health Laboratory, National Centre for Infectious Diseases             | Tze Minn Mak, Sophie Octavia, Zhenyang Zhou, Lin Cui, Raymond Tzer Pin Lin                                                                                                                                                                                                                                                                                                                                                                                               |
| EPI_ISL_599312                 | Lighthouse Lab in Glasgow                                                                                                                              | Wellcome Sanger Institute for the COVID-19 Genomics UK (COG-UK) consortium             | Harper VanSteenhouse, Yumi Kasai, David Gray, Carol Clugston, Anna Dominiczak and Alex Alderton, Roberto Amato, Sonia Goncalves, Ewan Harrison, David K. Jackson, Ian Johnston, Dominic Kwiatkowski, Cordelia Langford, John Sillitoe on behalf of the Wellcome Sanger Institute COVID-19 Surveillance Team ( <a href="http://www.sanger.ac.uk/covid-team">http://www.sanger.ac.uk/covid-team</a> )                                                                      |
| EPI_ISL_602441, EPI_ISL_602454 | HELIX LLC                                                                                                                                              | WHO National Influenza Centre Russian Federation                                       | Andrey Komissarov, Artem Fadeev, Kseniya Komissarova, Anna Ivanova, Dmitry Bazhenov, Daria Danilenko                                                                                                                                                                                                                                                                                                                                                                     |
| EPI_ISL_602866                 | NHLS-IALCH                                                                                                                                             | KRISP, KZN Research Innovation and Sequencing Platform                                 | Giandhari J. Pillay S, Lessells R, Mdlalose K, York D, Khan S, Tegally H, Wilkinson E, de Oliveira T                                                                                                                                                                                                                                                                                                                                                                     |
| EPI_ISL_603151                 | INMI Lazzaro Spallanzani IRCCS                                                                                                                         | INMI Lazzaro Spallanzani IRCCS                                                         | Francesco Messina, Barbara Bartolini, Cesare E.M. Gruber, Martina Rueca, Emanuela Giombini, Simone Lanini, Patrizia Massarelli, Maria R. Capobianchi, Antonino Di Caro                                                                                                                                                                                                                                                                                                   |
| EPI_ISL_604374, EPI_ISL_604964 | Quest Diagnostics                                                                                                                                      | Quest Diagnostics                                                                      | Rosenthal,S.H., Gerasimova,A., Kagan,R.M., Anderson, B., Grover, D., Livingston, K.E., Hua, M., Liu Y., Shalhout, D.F., Owen, R., Lacbawan, F.                                                                                                                                                                                                                                                                                                                           |
| EPI_ISL_605083                 | National Virus Reference Laboratory                                                                                                                    | Irish Coronavirus Sequencing Consortium - Helixworks                                   | Sachin Chalapati, Conor Crosbie, Nimesh Pinnamaneni                                                                                                                                                                                                                                                                                                                                                                                                                      |
| EPI_ISL_605796                 | Department of Experimental Modeling and Pathogenesis of Infectious Diseases                                                                            | WHO National Influenza Centre Russian Federation                                       | Andrey Komissarov, Artem Fadeev, Anna Ivanova, Kseniya Komissarova, Sobolev I.A., Alekseev A.Yu., Chepurinov A.A., Kononova Yu.V., Shestopalov A.M.                                                                                                                                                                                                                                                                                                                      |
| EPI_ISL_605797                 | National Virus Reference Laboratory                                                                                                                    | Irish Coronavirus Sequencing Consortium - Helixworks                                   | Sachin Chalapati, Conor Crosbie, Nimesh Pinnamaneni                                                                                                                                                                                                                                                                                                                                                                                                                      |
| EPI_ISL_605865                 | PathWest Laboratory Medicine WA                                                                                                                        | PathWest Laboratory Medicine WA Microbial Surveillance Unit                            | PathWest Laboratory Medicine WA Microbial Surveillance Unit                                                                                                                                                                                                                                                                                                                                                                                                              |
| EPI_ISL_605884                 | NGS Lab, DNA SOLUTION LTD.                                                                                                                             | NGS Lab, DNA SOLUTION LTD.                                                             | Khan,M.I., Hasan,K.N., Sufian,A., Polol,M.N.I., Khaleque,A., Rahman,M., Chowdhury,M., Haider,H.U., Razu,M.H., Khan,M., Rabbi,M.F.A.                                                                                                                                                                                                                                                                                                                                      |
| EPI_ISL_611484                 | Lighthouse Lab in Glasgow                                                                                                                              | Wellcome Sanger Institute for the COVID-19 Genomics UK (COG-UK) consortium             | Harper VanSteenhouse, Yumi Kasai, David Gray, Carol Clugston, Anna Dominiczak and Alex Alderton, Roberto Amato, Sonia Goncalves, Ewan Harrison, David K. Jackson, Ian Johnston, Dominic Kwiatkowski, Cordelia Langford, John Sillitoe on behalf of the Wellcome Sanger Institute COVID-19 Surveillance Team ( <a href="http://www.sanger.ac.uk/covid-team">http://www.sanger.ac.uk/covid-team</a> )                                                                      |
| EPI_ISL_615100                 | Klinisk mikrobiologi Lanssjukhuset Ryhov, Jonkoping                                                                                                    | The Public Health Agency of Sweden                                                     | Anna-Malin Linde, Maria Lind Karlberg, Mattias Haukland, Reza Advani, Olov Svartstrom, Oskar Karlsson Lindsjo, Sandra Broddesson, Petra Edquist, Mia Brytting, Anna Risberg, Karin Tegmark-Wisell                                                                                                                                                                                                                                                                        |
| EPI_ISL_616256                 | Department of Virus and Microbiological Special Diagnostics, Statens Serum Institut, Denmark                                                           | Albertsen lab, Department of Chemistry and Bioscience, Aalborg University, Denmark     | Danish Covid-19 Genome Consortia                                                                                                                                                                                                                                                                                                                                                                                                                                         |
| EPI_ISL_623046                 | National Health Laboratory Service                                                                                                                     | National Institute for Communicable Diseases of the National Health Laboratory Service | Allam M, Ismail A, Khumalo Z, Kwenda S, Mtshali P, Mnyameni F, Mohale T, Subramoney K, Bhiman JN                                                                                                                                                                                                                                                                                                                                                                         |
| EPI_ISL_624797                 | Lighthouse Lab in Alderley Park                                                                                                                        | Wellcome Sanger Institute for the COVID-19 Genomics UK (COG-UK) consortium             | Jacquelyn Wynn, Mairead Hyland, The Lighthouse Lab in Alderley Park and Alex Alderton, Roberto Amato, Sonia Goncalves, Ewan Harrison, David K. Jackson, Ian Johnston, Dominic Kwiatkowski, Cordelia Langford, John Sillitoe on behalf of the Wellcome Sanger Institute COVID-19 Surveillance Team ( <a href="http://www.sanger.ac.uk/covid-team">http://www.sanger.ac.uk/covid-team</a> )                                                                                |
| EPI_ISL_625560                 | NaN                                                                                                                                                    | Chan-Zuckerberg Biohub                                                                 | CZB Cliahub Consortium                                                                                                                                                                                                                                                                                                                                                                                                                                                   |
| EPI_ISL_625991                 | Department of Virus and Microbiological Special Diagnostics, Statens Serum Institut, Denmark                                                           | Albertsen lab, Department of Chemistry and Bioscience, Aalborg University, Denmark     | Danish Covid-19 Genome Consortia                                                                                                                                                                                                                                                                                                                                                                                                                                         |
| EPI_ISL_626562                 | Laboratorio de Biología Molecular, Facultad de Medicina, Universidad de Atacama, Copiapo, Chile/ FONDAP CRG, Universidad Andrés Bello, Santiago, Chile | Center for Mathematical Modeling and Center for Genome Regulation. Santiago, Chile     | Echeverria C, Manriquez R, Bastias M, Sanhueza D, Travisany D, Allende ML, Maass A, González M, Montecino, M, Orellana A, Castro E, Meneses C.                                                                                                                                                                                                                                                                                                                           |
| EPI_ISL_627519                 | Regional Virus Laboratory, Belfast Health and Social Care Trust                                                                                        | COVID-19 Genomics UK (COG-UK) Consortium                                               | Conall McCaughey, James McKenna, Tanya Curran, Susan Feeney, Alison Watt, Ciara Cox, Mairead Connor, Zoltan Molnar, David Simpson, Derek Fairley                                                                                                                                                                                                                                                                                                                         |
| EPI_ISL_628743                 | Texas Department of State Health Services                                                                                                              | Texas Department of State Health Services                                              | Rashmi Tuladhar, Bonnie Oh, Jenny Zhang, Maliha Rahman, Anita Pokharel, Myong Koag, Chung Wang, Rachel Lee, Grace Kubin, Mayela Pedrueza                                                                                                                                                                                                                                                                                                                                 |
| EPI_ISL_632313                 | NU-sjukvården                                                                                                                                          | Clinical Microbiology, Sahlgrenska University Hospital,                                | Johan Ringlander, Josefin Olausson, Hedvig Engström Jakobsson, Magnus Lindh                                                                                                                                                                                                                                                                                                                                                                                              |
| EPI_ISL_632480, EPI_ISL_632566 | Dutch COVID-19 response team                                                                                                                           | Erasmus Medical Center                                                                 | Bas Oude Munnink, David Nieuwenhuijse, Reina Sikkema, Claudia Schapendonk, Irina Chestakova, Anne van der Linden, Theo Bestebroer, Stefan van Nieuwkoop, Mark Pronk, Pascal Lexmond, Corien Swaan, Manon Haverkate, Madelief Mollers, Mart Stein, Sandra Kengne Kanga Mobou, Jeroen van Kampen, Jolanda Voermans, Aura Timen, Corine GeurtsvanKessel, Annetiek van der Eijk, Richard Molenkamp, Marion Koopmans, on behalf of the Dutch national COVID-19 response team. |
| EPI_ISL_632904                 | Communicable Disease Laboratory, Public Health Directorate                                                                                             | Communicable Disease Laboratory, Public Health Directorate                             | AlTaif,Z., AlHujairi,Z., AlWasti,H., AlAbbas,Z.                                                                                                                                                                                                                                                                                                                                                                                                                          |
| EPI_ISL_632933                 | Cadham Provincial laboratory                                                                                                                           | Cadham Provincial laboratory                                                           | Anna Majer, Shari Tyson, Grace Seo, Philip Mabon, Elsie Grudeski, Rhiannon Huzarewich, Russell Mandes, Anneliese Landgraff, Jennifer Tanner, Natalie Knox, Morag Graham, Gary Van Domselaar, Paul Van Caesele, Jared Bullard, David Alexander, Kerry Dust, Nathalie Bastien, Yan Li, Timothy Booth, Darian Hole, Madison Chapel, CanCOGeN's metadata curation team, Public Health Agency of Canada CanCOGeN team                                                         |
| EPI_ISL_632990                 | DOHMH Corona                                                                                                                                           | New York City Public Health Laboratory                                                 | Jade Wang, et al.                                                                                                                                                                                                                                                                                                                                                                                                                                                        |
| EPI_ISL_634459                 | Lighthouse Lab in Milton Keynes                                                                                                                        | Wellcome Sanger Institute for the COVID-19 Genomics UK (COG-UK) consortium             | The Lighthouse Lab in Milton Keynes and Alex Alderton, Roberto Amato, Sonia Goncalves, Ewan Harrison, David K. Jackson, Ian Johnston, Dominic Kwiatkowski, Cordelia Langford, John Sillitoe on behalf of the Wellcome Sanger Institute COVID-19 Surveillance Team                                                                                                                                                                                                        |
| EPI_ISL_634733                 | Lighthouse Lab in Glasgow                                                                                                                              | Wellcome Sanger Institute for the COVID-19 Genomics UK (COG-UK) consortium             | Harper VanSteenhouse, Yumi Kasai, David Gray, Carol Clugston, Anna Dominiczak and Alex Alderton, Roberto Amato, Sonia Goncalves, Ewan Harrison, David K. Jackson, Ian Johnston, Dominic Kwiatkowski, Cordelia Langford, John Sillitoe on behalf of the Wellcome Sanger Institute COVID-19 Surveillance Team ( <a href="http://www.sanger.ac.uk/covid-team">http://www.sanger.ac.uk/covid-team</a> )                                                                      |
| EPI_ISL_634878                 | Lab voor klinische biologie                                                                                                                            | Onderzoeksgroep Virologie                                                              | Laurens Lambrechts, Nick Vereecke, Marthe Pauwels, Bruno Verhasselt, Linos Vandekerckhove, Hans Nauwynck, Sebastiaan Theuns                                                                                                                                                                                                                                                                                                                                              |
| EPI_ISL_635025                 | National Health Laboratory Service - Inkosi Albert Luthuli Central Hospital (NHLS-IALCH)                                                               | KRISP, KZN Research Innovation and Sequencing Platform                                 | Giandhari J. Pillay S, Lessells R, Mdlalose K, York D, Khan S, Tegally H, Wilkinson E, de Oliveira T                                                                                                                                                                                                                                                                                                                                                                     |
| EPI_ISL_635990                 | San Diego County Public Health Laboratory                                                                                                              | Andersen lab at Scripps Research                                                       | SEARCH Alliance San Diego with Tracy Basler, Jovan Shephard, Brett Austin                                                                                                                                                                                                                                                                                                                                                                                                |
| EPI_ISL_636594                 | Dutch COVID-19 response team                                                                                                                           | National Institute for Public Health and the Environment                               | Adam Meijer, Harry Vennema, Jeroen Cremer, Sharon van den Brink, Bas van der Veer, AnneMarie van den Brandt, Florian Zwagemaker, Dennis Schmitz,                                                                                                                                                                                                                                                                                                                         |



|                                |                                                                                                                                                                                                                | (RIVM)                                                                                                                                                                                                                                                                                                                                                                   | Chantal Reusken, on behalf of the national COVID-19 response team                                                                                                                                                                                                                                                                                                                                                 |
|--------------------------------|----------------------------------------------------------------------------------------------------------------------------------------------------------------------------------------------------------------|--------------------------------------------------------------------------------------------------------------------------------------------------------------------------------------------------------------------------------------------------------------------------------------------------------------------------------------------------------------------------|-------------------------------------------------------------------------------------------------------------------------------------------------------------------------------------------------------------------------------------------------------------------------------------------------------------------------------------------------------------------------------------------------------------------|
| EPI_ISL_636841                 | Lithuanian University of Health Sciences Hospital, Department of Laboratory Medicine                                                                                                                           | Lithuanian University of Health Sciences, Molecular cardiology lab.                                                                                                                                                                                                                                                                                                      | Lukas Zemaitis, Ingrida Olendrait, Arnoldas Pautienius, Kamile Tamauskaite, Dovydas Geceys, Laura Pareckaitė, Vaiva Lesauskaite, Astra Vitkauskiene                                                                                                                                                                                                                                                               |
| EPI_ISL_636926                 | Public Health Ontario Laboratory                                                                                                                                                                               | Public Health Ontario Laboratory                                                                                                                                                                                                                                                                                                                                         | Vanessa G Allen, Philip Banh, Richard de Borja, Yao Chen, Alireza Eshaghi, Nahuel Fittipaldi, Christine Frantz, Jonathan B Gubbay, Jennifer L Guthrie, Lawrence Heisler, Esha Joshi, Michael Laszloffy, Aimin Li, Michael CY Li, Dean Maxwell, Sandeep Nagra, Samir N Patel, Heather Rilkoﬀ, Jared Simpson, Karthikeyan Sivaraman, Yogi Sundaravadanam, Sarah Teatero, Andre Villegas, Sandra Zittermann          |
| EPI_ISL_638416                 | Department of Pathology, University of Cambridge                                                                                                                                                               | COVID-19 Genomics UK (COG-UK) Consortium                                                                                                                                                                                                                                                                                                                                 | Aminu S. Jahun, Yasmin Chaudhry, Grant Hall, Iliana Georgana, Myra Hosmillo, Martin D. Curran, Malte Pinckert, Surendra Parmar, Ian Goodfellow                                                                                                                                                                                                                                                                    |
| EPI_ISL_639332                 | Wales Specialist Virology Centre Sequencing lab: Pathogen Genomics Unit                                                                                                                                        | COVID-19 Genomics UK (COG-UK) Consortium                                                                                                                                                                                                                                                                                                                                 | Catherine Moore, Johnathan Evans, Laura Gifford, Malorie Perry, Simon Cottrell, Angela Marchbank, Alec Birchley, Alexander Adams, Amy Gaskin, Bree Gatica-Wilcox, Jason Coombes, Joel Southgate, Lauren Gilbert, Lee Graham, Nicole Pacchiari, Sara Kumziene-Summerhayes, Sarah Taylor, Sophie Jones, Sara Rey, Matthew Bull, Joanne Watkins, Sally Corden, Tom Connor                                            |
| EPI_ISL_639687                 | E. Gulbja Laboratorija                                                                                                                                                                                         | Latvian Biomedical Research and Study Centre                                                                                                                                                                                                                                                                                                                             | Ivars Silamielis, Kaspars Megnis, Monta Ustinova, ikitā Zrelavs, Vita Rovte, Mikus Gavars, Dmitrijs Perminovs, Uga Dumpis, Jnis Kloviš                                                                                                                                                                                                                                                                            |
| EPI_ISL_639739                 | Centre of Nanotechnologies, INCD IMT-Bucuresti (National Institute for Research and Development in Microtechnologies - Bucharest)                                                                              | Centre of Nanotechnologies, INCD IMT-Bucuresti (National Institute for Research and Development in Microtechnologies - Bucharest)                                                                                                                                                                                                                                        | Salceanu,A., Gogianu,L. and Baisan,M.                                                                                                                                                                                                                                                                                                                                                                             |
| EPI_ISL_639742                 | unknown                                                                                                                                                                                                        | Public Health Virology Laboratory, Forensic and Scientific Services (PHV-FSS)                                                                                                                                                                                                                                                                                            | Son Nguyen et al.                                                                                                                                                                                                                                                                                                                                                                                                 |
| EPI_ISL_639973                 | HELIX LLC                                                                                                                                                                                                      | WHO National Influenza Centre Russian Federation                                                                                                                                                                                                                                                                                                                         | Andrey Komissarov, Artem Fadeev, Kseniya Komissarova, Anna Ivanova, Dmitry Bazhenov, Daria Danilenko                                                                                                                                                                                                                                                                                                              |
| EPI_ISL_640018                 | Heidelberg Clinic wc HBC                                                                                                                                                                                       | NHLS/UCT                                                                                                                                                                                                                                                                                                                                                                 | Arash Iranzadeh, Deelan Doolabh, Lynn Tyers, Bruna Galvao, Innocent Mudau, Marvin Hsiao, Kruger Marais, Diana Hardie, Stephen Korsman, Carolyn Williamson                                                                                                                                                                                                                                                         |
| EPI_ISL_640079                 | Stellenbosch Hospital wc STB                                                                                                                                                                                   | NHLS/UCT                                                                                                                                                                                                                                                                                                                                                                 | Arash Iranzadeh, Deelan Doolabh, Lynn Tyers, Bruna Galvao, Innocent Mudau, Marvin Hsiao, Kruger Marais, Diana Hardie, Stephen Korsman, Carolyn Williamson                                                                                                                                                                                                                                                         |
| EPI_ISL_643572                 | Lighthouse Lab in Cambridge                                                                                                                                                                                    | Wellcome Sanger Institute for the COVID-19 Genomics UK (COG-UK) Consortium                                                                                                                                                                                                                                                                                               | Rob Howes, The Lighthouse Lab in Cambridge and Alex Alderton, Roberto Amato, Sonia Goncalves, Ewan Harrison, David K. Jackson, Ian Johnston, Dominic Kwiatkowski, Cordelia Langford, John Sillitoe on behalf of the Wellcome Sanger Institute COVID-19 Surveillance Team                                                                                                                                          |
| EPI_ISL_645109                 | Human Genome Variation Research Group, Malopolska Centre of Biotechnology                                                                                                                                      | Human Genome Variation Research Group, Malopolska Centre of Biotechnology                                                                                                                                                                                                                                                                                                | Kowalski,M., Pospiech,E., Klajmon,A., Gromowski,T., Pisarek,A., Marszalek,K., Kopera,K., Foremny,J., Swadzba,J., Sanak,M., Owczarek,K., Dabrowska,A., Szczepanski,A., Botwina,P., Labaj,P.P., Pyrc,K., Branicki,W.                                                                                                                                                                                                |
| EPI_ISL_645183                 | CHU de Limoges                                                                                                                                                                                                 | CNR Virus des Infections Respiratoires - France SUD                                                                                                                                                                                                                                                                                                                      | Antonin Bal, Gregory Destras, Gwendolynne Burfin, Hadrien Règue, Quentin Semanas, Martine Valette, Bruno Lina, Sylvie Rogez, Laurence Josset                                                                                                                                                                                                                                                                      |
| EPI_ISL_653900                 | Translational Health Science and Technology Institute                                                                                                                                                          | National Institute of Biomedical Genomics                                                                                                                                                                                                                                                                                                                                | Arindam Maitra, Guruprasad Medigeshi, Sharanabasava Patil, Anbalagan Ananthraj, Madhu Pareek, Imran Khan, Gagandeep Kang, Saumitra Das                                                                                                                                                                                                                                                                            |
| EPI_ISL_653925                 | Molecular diagnostic laboratory of Federal Budget Institution of Science "Central Research Institute of Epidemiology" of The Federal Service on Customers' Rights Protection and Human Well-being Surveillance | Group of Genomics and Postgenomic Technologies of Central Research Institute of Epidemiology                                                                                                                                                                                                                                                                             | Samoilov AE, Kapteleva VV, Dudorova A.V., Speranskaya AS, Tivanova EV, Shipulina OY, Akimkin VG                                                                                                                                                                                                                                                                                                                   |
| EPI_ISL_654016                 | Laboratory of Microbiology, National Reference Lab, Charles Nicolle Hospital; 2-University of Tunis ElManar, Faculty of Medicine of Tunis, LR99ES09, Tunis, Tunisia                                            | 1-Clinical and Experimental Pharmacology Lab, LR16SP02, National Center of Pharmacovigilance, University of Tunis El Manar, Tunis, Tunisia. 2-Neurodegenerative diseases and psychiatric troubles, LR18SP03, Razi Hospital, University of Tunis El Manar, Tunis, Tunisia. 3- Ministry of Health, National Observatory of New and Emerging Diseases, 1006, Tunis, Tunisia | Ilhem Boutiba-Ben Boubaker, Sameh Trabelsi, Nissaf Ben Alaya, Maher Kharrat, Alia Ben Kahla, Jaïlla Ben Khelil, Salma Abid, Sana Ferjani, Mouna Ben Sassi, Mouna Safer, Imen Mkada, Imen Kacem, Gaies Emma, Soumaya Rammeh, Riadh Daghfous, Riadh Gouider.                                                                                                                                                        |
| EPI_ISL_654820                 | Department of Respiratory and other Viral Infections of L.V.Gromashevsky Institute of Epidemiology & Infectious Diseases NAMS of Ukraine                                                                       | Department of Respiratory and other Viral Infections of L.V.Gromashevsky Institute of Epidemiology & Infectious Diseases NAMS of Ukraine, JSC "Farmak"                                                                                                                                                                                                                   | Alla Mironenko, Andriy Goy, Ihor Kravchuk, Ludmyla Bolotova, Larysa Radchenko, Natalia Teteriuk                                                                                                                                                                                                                                                                                                                   |
| EPI_ISL_658904                 | Instituto de Diagnostico y Referencia Epidemiologicos (INDRE)                                                                                                                                                  | Instituto de Diagnostico y Referencia Epidemiologicos (INDRE)                                                                                                                                                                                                                                                                                                            | Ernesto Ramirez-Gonzalez, Abril Rodriguez-Maldonado, Claudia Wong-Arambula , Nativity Cruz-Ortiz, Tatiana Nunez-Garcia, Dayanira Arellano-Suarez, Fabiola Garces-Ayala, Lucia Hernandez-Rivas, Irma Lopez-Martinez, Gisela Barrera-Badillo, Marisol Galindo-Galindo, Linda Andarade-Sanchez, Octavio Ruiz-Muñiz, Pamela Ramirez-Medina, Roman Canul-Aguilar, Gaudalupe Herrera-Ramirez, Jazmin Galicia-Hernandez. |
| EPI_ISL_660443, EPI_ISL_660444 | Hospital de Braga                                                                                                                                                                                              | Instituto Nacional de Saude (INSA)                                                                                                                                                                                                                                                                                                                                       | Borges et al                                                                                                                                                                                                                                                                                                                                                                                                      |
| EPI_ISL_660465                 | Laboratoire de Microbiologie CHU Souro Sanou                                                                                                                                                                   | Centre Muraz                                                                                                                                                                                                                                                                                                                                                             | Abdoul-Salam Ouedraogo, Yacouba Sawadogo, Essia Belarbi, Grit Schubert, Fabian Leendertz, Arsène Zongo, Soumeiya Ouangraoua, Zekiba Tarnagda, Lassana Sangaré, Halidou Tinto                                                                                                                                                                                                                                      |
| EPI_ISL_660529                 | Institute of Microbiology, Universidad San Francisco de Quito                                                                                                                                                  | Institute of Microbiology, Universidad San Francisco de Quito                                                                                                                                                                                                                                                                                                            | Sully Márquez, Belén Prado-Vivar, Juan José Guadalupe, Monica Becerra-Wong, Bernardo Gutiérrez, Manuel Jaramillo, Verónica Barragán, Patricio Rojas-Silva, Gabriel Trueba, Michelle Grunauer, Paúl Cárdenas                                                                                                                                                                                                       |
| EPI_ISL_660542                 | National Influenza Center, National Institute of Hygiene and Epidemiology (NIHE)                                                                                                                               | National Institute of Hygiene and Epidemiology (NIHE)                                                                                                                                                                                                                                                                                                                    | Le Quynh Mai, Taichiro Takemura, Meng Ling Moi, Takeshi Nabeshima, Nguyen Le Khanh Hang, Hoang Vu Mai Phuong, Ung Thi Hong Trang, Le Thi Thanh, Nguyen Vu Son, Vuong Duc Cuong, Pham Thi Hien, Tran Thu Huong, Nguyen Phuong Anh, Pham Hong Quynh Anh, Kouichi Morita, Futoshi Hasebe, Dang Duc Anh                                                                                                               |
| EPI_ISL_660597                 | The National Institute of Public Health                                                                                                                                                                        | State Veterinary Institute Prague                                                                                                                                                                                                                                                                                                                                        | Nagy,A.;Jirincova,H;Novakova,L;Trnka,D;Vecerova,J                                                                                                                                                                                                                                                                                                                                                                 |
| EPI_ISL_660616                 | NHLS-IALCH                                                                                                                                                                                                     | KRISP, KZN Research Innovation and Sequencing Platform                                                                                                                                                                                                                                                                                                                   | Giandhari J, Pillay S, Lessells R, Mdlalose K, York D, Khan S, Tegally H, Wilkinson E, de Oliveira T                                                                                                                                                                                                                                                                                                              |
| EPI_ISL_665240                 | University College London Hospital                                                                                                                                                                             | COVID-19 Genomics UK (COG-UK) Consortium                                                                                                                                                                                                                                                                                                                                 | Judith Heaney, Matthew Byott, Catherine Houlihan, Dan Frampton, Stuart Kirk, Moira Spyer and Eleni Nastouli                                                                                                                                                                                                                                                                                                       |
| EPI_ISL_666629                 | ZOTZ KLIMAS MVZ Düsseldorf-Centrum GbR ÜBAG für Labormedizin, Genetik, Zytologie, Pathologie                                                                                                                   | Center of Medical Microbiology, Virology, and Hospital Hygiene, University of Duesseldorf                                                                                                                                                                                                                                                                                | Maximilian Damagnez, Alexander Dilthey, Ashley-Jane Duplessis, Patrick Finzer, Katrin Hoffmann, Torsten Houwaart, Lisanna Hülse, Malte Kohns Vasconcelos, Marek Korencak, Nadine Lübke, Jessica Nicolai, Klaus Pfeffer, Daniel Strelow, Jörg Timm, Andreas Walker, Tobias Wienemann, Rainer Zotz                                                                                                                  |
| EPI_ISL_667687, EPI_ISL_667757 | Pathogen Genomics Center, National Institute of Infectious Diseases                                                                                                                                            | Pathogen Genomics Center, National Institute of Infectious Diseases                                                                                                                                                                                                                                                                                                      | Tsuyoshi Sekizuka, Kentaro Itokawa, Rina Tanaka, Masanori Hashino, Makoto Kuroda                                                                                                                                                                                                                                                                                                                                  |
| EPI_ISL_670018, EPI_ISL_671225 | Department of Virus and Microbiological Special Diagnostics, Statens Serum Institut, Copenhagen, Denmark                                                                                                       | Albertsen Lab, Department of Chemistry and Bioscience, Aalborg University, Denmark                                                                                                                                                                                                                                                                                       | Danish Covid-19 Genome Consortium                                                                                                                                                                                                                                                                                                                                                                                 |
| EPI_ISL_671363                 | National Virus Reference Laboratory                                                                                                                                                                            | Irish Coronavirus Sequencing Consortium - Teagasc Moorepark                                                                                                                                                                                                                                                                                                              | Calum Walsh, Fiona Crispie, John Kenny, Paul Cotter                                                                                                                                                                                                                                                                                                                                                               |
| EPI_ISL_671581                 | Public Health Ontario Laboratory                                                                                                                                                                               | Public Health Ontario Laboratory                                                                                                                                                                                                                                                                                                                                         | Vanessa G Allen, Philip Banh, Richard de Borja, Yao Chen, Alireza Eshaghi, Nahuel Fittipaldi, Christine Frantz, Jonathan B Gubbay, Jennifer L Guthrie, Lawrence Heisler, Esha Joshi, Michael Laszloffy, Aimin Li, Michael CY Li, Dean Maxwell, Sandeep Nagra, Samir N Patel, Heather Rilkoﬀ, Jared Simpson, Karthikeyan Sivaraman, Yogi Sundaravadanam, Sarah Teatero, Andre Villegas, Sandra Zittermann          |
| EPI_ISL_672003                 | UEES BioLab                                                                                                                                                                                                    | Omics Sciences Laboratory                                                                                                                                                                                                                                                                                                                                                | Derly Andrade Molina, Rubén Armas González, Gabriel Morey León, Darlyn Amaya, Katheryn Sacheri Viteri, Edith Lopez Montanero, Pedro Barberán, Fernando Espinoza Fuentes, Juan Carlos Fernández Cadena                                                                                                                                                                                                             |
| EPI_ISL_672376, EPI_ISL_672381 | San Francisco Public Health Laboratory                                                                                                                                                                         | Chan-Zuckerberg Biohub                                                                                                                                                                                                                                                                                                                                                   | CZB Cliahub Consortium                                                                                                                                                                                                                                                                                                                                                                                            |

EPI\_ISL\_675718

Lighthouse Lab in Milton Keynes

Wellcome Sanger Institute for the COVID-19 Genomics  
UK (COG-UK) Consortium

The Lighthouse Lab in Milton Keynes and Alex Alderton, Roberto Amato, Sonia Goncalves, Ewan Harrison, David K. Jackson, Ian Johnston, Dominic Kwiatkowski, Cordelia Langford, John Sillitoe on behalf of the Wellcome Sanger Institute COVID-19 Surveillance Team

We gratefully acknowledge the following Authors from the Originating laboratories responsible for obtaining the specimens, as well as the Submitting laboratories where the genome data were generated and shared via GISAID, on which this research is based.

All Submitters of data may be contacted directly via [www.gisaid.org](http://www.gisaid.org)

| Accession ID                                   | Originating Laboratory                                                                                                                                                                     | Submitting Laboratory                                                                                                | Authors                                                                                                                                                                                                                                                                                          |
|------------------------------------------------|--------------------------------------------------------------------------------------------------------------------------------------------------------------------------------------------|----------------------------------------------------------------------------------------------------------------------|--------------------------------------------------------------------------------------------------------------------------------------------------------------------------------------------------------------------------------------------------------------------------------------------------|
| EPI_ISL_660258                                 | KRISP, KZN Research Innovation and Sequencing Platform                                                                                                                                     | KRISP, KZN Research Innovation and Sequencing Platform                                                               | Giandhari J, Pillay S, Lessells R, Mdlalose K, York D, Khan S, Tegally H, Wilkinson E, de Oliveira T                                                                                                                                                                                             |
| EPI_ISL_660299                                 | Servicio de Microbiología, Laboratori Clínic Metropolitana Nord. Hospital Universitari Germans Trias i Pujol. Institut d'Investigació en Ciències de la Salut Germans Trias i Pujol (IGTP) | SeqCOVID-SPAIN consortium/IBV(CSIC)                                                                                  | Elisa Martró, Antoni E. Bordoy, Anna Not, Adrián Antuori, Anabel Fernández, Nona Romani and SeqCOVID-SPAIN consortium                                                                                                                                                                            |
| EPI_ISL_660444                                 | Hospital de Braga                                                                                                                                                                          | Instituto Nacional de Saude (INSA)                                                                                   | Borges et al                                                                                                                                                                                                                                                                                     |
| EPI_ISL_660493                                 | Laboratoire de Microbiologie CHU Souro Sanou                                                                                                                                               | Centre Muraz                                                                                                         | Abdoul-Salam Ouedraogo, Yacouba Sawadogo, Essia Belarbi, Grit Schubert, Fabian Leendertz, Arsène Zongo, Soumeiya Ouangraoua, Zekiba Tarnagda, Lassana Sangaré, Halidou Tinto                                                                                                                     |
| EPI_ISL_660529                                 | Institute of Microbiology, Universidad San Francisco de Quito                                                                                                                              | Institute of Microbiology, Universidad San Francisco de Quito                                                        | Sully Márquez, Belén Prado-Vivar, Juan José Guadalupe, Monica Becerra-Wong, Bernardo Gutiérrez, Manuel Jaramillo, Verónica Barragán, Patricio Rojas-Silva, Gabriel Trueba, Michelle Grunauer, Paul Cárdenas                                                                                      |
| EPI_ISL_660543                                 | Laboratory Medicine                                                                                                                                                                        | Department of Laboratory Medicine, Lin-Kou Chang Gung Memorial Hospital, Taoyuan, Taiwan                             | Kuo-Chien Tsao, Yu-Nong Gong, Shu-Li Yang, Yi-Chun Liu, Chung-Guei Huang, Mei-Jen Hsiao, Po-Wei Huang, Cheng-Ta Yang, Cheng-Hsun Chiu, Peng-Nien Huang, Kuo-Ming Lee, Guang-Wu Chen, Shin-Ru Shih                                                                                                |
| EPI_ISL_660632, EPI_ISL_660662                 | NHLS-IALCH                                                                                                                                                                                 | KRISP, KZN Research Innovation and Sequencing Platform                                                               | Giandhari J, Pillay S, Lessells R, Mdlalose K, York D, Khan S, Tegally H, Wilkinson E, de Oliveira T                                                                                                                                                                                             |
| EPI_ISL_664673                                 | University College London Hospital                                                                                                                                                         | COVID-19 Genomics UK (COG-UK) Consortium                                                                             | Judith Heaney, Matthew Byott, Catherine Houlihan, Dan Frampton, Stuart Kirk, Moira Spyer and Eleni Nastouli                                                                                                                                                                                      |
| EPI_ISL_666629                                 | ZOTZ KLIMAS MVZ Düsseldorf-Centrum GbR ÜBAG für Labormedizin, Genetik, Zytologie, Pathologie                                                                                               | Center of Medical Microbiology, Virology, and Hospital Hygiene, University of Duesseldorf                            | Maximilian Damagnez, Alexander Dilthey, Ashley-Jane Duplessis, Patrick Finzer, Katrin Hoffmann, Torsten Houwaart, Lisanna Hülse, Malte Kohns Vasconcelos, Marek Korencak, Nadine Lübke, Jessica Nicolai, Klaus Pfeffer, Daniel Strelow, Jörg Timm, Andreas Walker, Tobias Wienemann, Rainer Zotz |
| EPI_ISL_666670                                 | Laboratoire du Centre Hospitalier Anecy Genevois                                                                                                                                           | CNR Virus des Infections Respiratoires - France SUD                                                                  | Antonin Bal, Gregory Destras, Gwendolynne Burfin, Hadrien Règue, Quentin Semanas, Martine Valette, Bruno Lina, Héliène Petitprez, Bruno Chanzy, Laurence Josset                                                                                                                                  |
| EPI_ISL_667677                                 | Pathogen Genomics Center, National Institute of Infectious Diseases                                                                                                                        | Pathogen Genomics Center, National Institute of Infectious Diseases                                                  | Tsuyoshi Sekizuka, Kentaro Itokawa, Rina Tanaka, Masanori Hashino, Makoto Kuroda                                                                                                                                                                                                                 |
| EPI_ISL_667797                                 | South Eastern Area Laboratory Services (SEALS)                                                                                                                                             | NSW Health Pathology - Institute of Clinical Pathology and Medical Research; Westmead Hospital; University of Sydney | CIDM-PH et al.                                                                                                                                                                                                                                                                                   |
| EPI_ISL_668401                                 | Oslo University Hospital, Department of Medical Microbiology                                                                                                                               | Norwegian Institute of Public Health, Department of Virology                                                         | Kathrine Stene-Johansen, Kamilla Heddeland Instefjord, Hilde Elshaug, Marie Paulsen Madsen, Rasmus Riis Kopperud, Hilde Vollan, Karoline Bragstad, Olav Hungnes                                                                                                                                  |
| EPI_ISL_669517, EPI_ISL_670543, EPI_ISL_671140 | Department of Virus and Microbiological Special Diagnostics, Statens Serum Institut, Copenhagen, Denmark                                                                                   | Albertsen Lab, Department of Chemistry and Bioscience, Aalborg University, Denmark                                   | Danish Covid-19 Genome Consortium                                                                                                                                                                                                                                                                |
| EPI_ISL_671756                                 | DOHMH Morrisania                                                                                                                                                                           | New York City Public Health Laboratory                                                                               | Jade Wang, et al.                                                                                                                                                                                                                                                                                |
| EPI_ISL_671852                                 | Servicio de Microbiología, Laboratori Clínic Metropolitana Nord. Hospital Universitari Germans Trias i Pujol. Institut d'Investigació en Ciències de la Salut Germans Trias i Pujol (IGTP) | SeqCOVID-SPAIN consortium/IBV(CSIC)                                                                                  | Elisa Martró, Antoni E. Bordoy, Anna Not, Adrián Antuori, Anabel Fernández, Nona Romani, Verónica Saludes, Cristina Casañ and SeqCOVID-SPAIN consortium                                                                                                                                          |
| EPI_ISL_671968                                 | CHU Purpan - Laboratoire de Virologie - Institut Fédératif de Biologie                                                                                                                     | CHU Purpan - Laboratoire de Virologie - Institut Fédératif de Biologie                                               | Latour J., Ranger N., Dubois M., Carcenac R., Harter A., Boyer P., Tremeaux P., Izopet J.                                                                                                                                                                                                        |
| EPI_ISL_671983                                 | UEES BioLab                                                                                                                                                                                | Omics Sciences Laboratory                                                                                            | Derly Andrade Molina, Rubén Armas González, Gabriel Morey León, Darlyn Amaya, Kathryn Sacheri Viteri, Edith Lopez Montanero, Pedro Barberán, Fernando Espinoza Fuentes, Juan Carlos Fernández Cadena                                                                                             |
| EPI_ISL_673138                                 | Lighthouse Lab in Cambridge                                                                                                                                                                | Wellcome Sanger Institute for the COVID-19 Genomics UK (COG-UK) Consortium                                           | Rob Howes, The Lighthouse Lab in Cambridge and Alex Alderton, Roberto Amato, Sonia Goncalves, Ewan Harrison, David K. Jackson, Ian Johnston, Dominic Kwiatkowski, Cordelia Langford, John Sillitoe on behalf of the Wellcome Sanger Institute COVID-19 Surveillance Team                         |
| EPI_ISL_676527                                 | Uppsala klinisk mikrobiologi                                                                                                                                                               | The Public Health Agency of Sweden                                                                                   | Department of Microbiology, The Public Health Agency of Sweden                                                                                                                                                                                                                                   |
| EPI_ISL_677863                                 | Innovative Genomics Institute, UC Berkeley                                                                                                                                                 | Innovative Genomics Institute, UC Berkeley                                                                           | Stacia Wyman, Haridha Shivram, Phil Frankino, Liana Lareau, Shana McDevitt, Justin Choi                                                                                                                                                                                                          |
| EPI_ISL_677914                                 | Pathogen Genomics Lab King Abdullah University of Science and Technology(KAUST)                                                                                                            | Pathogen Genomics Lab King Abdullah University of Science and Technology(KAUST)                                      | Muhammad Shuaib, Raece Naeem, Sara Mfarrej, Raushan Nugmanova, Olga Douvropoulou, Luke Esau, Amanda Ooi, Sharif Hala, Afrah Alsomali, Asim Khogeer, Fadwa Alofi, Jumana Taha, Abdulaziz Alahmadi, Kahled Alghithami, Anwar Hashem, Naif Almontashiri, Arnab Pain                                 |
| EPI_ISL_678107                                 | Pathogen Genomics Lab King Abdullah University of Science and Technology(KAUST)                                                                                                            | Pathogen Genomics Lab King Abdullah University of Science and Technology(KAUST)                                      | Amanda Ooi, Luke Esau, Sara Mfarrej, Raece Naeem, Sharif Hala, Asim Khogeer, Fadwa Alofi, Afrah Alsomali, Jumana Taha, Abdulaziz Alahmadi, Kahled Alghithami, Anwar Hashem, Naif Almontashiri, Arnab Pain                                                                                        |
| EPI_ISL_680415                                 | Regional Virus Laboratory, Belfast Health and Social Care Trust                                                                                                                            | COVID-19 Genomics UK (COG-UK) Consortium                                                                             | Conall McCaughey, James McKenna, Tanya Curran, Susan Feeney, Alison Watt, Ciara Cox, Mairead Connor, Zoltan Molnar, David Simpson, Derek Fairley                                                                                                                                                 |
| EPI_ISL_681472                                 | Lighthouse Lab in Milton Keynes                                                                                                                                                            | Wellcome Sanger Institute for the COVID-19 Genomics UK (COG-UK) Consortium                                           | The Lighthouse Lab in Milton Keynes and Alex Alderton, Roberto Amato, Sonia Goncalves, Ewan Harrison, David K. Jackson, Ian Johnston, Dominic Kwiatkowski, Cordelia Langford, John Sillitoe on behalf of the Wellcome Sanger Institute COVID-19 Surveillance Team                                |
| EPI_ISL_681748                                 | University Hospital Limerick                                                                                                                                                               | Irish Coronavirus Sequencing Consortium - Teagasc Moorepark                                                          | Paul Cotter, Fiona Crispie, Amy Fitzpatrick, John Kenny, Carolyn Meaney, Patrick Stapleton, Calum Walsh                                                                                                                                                                                          |
| EPI_ISL_686603                                 | Respiratory Virus Unit, Microbiology Services Colindale, Public Health England                                                                                                             | COVID-19 Genomics UK (COG-UK) Consortium                                                                             | PHE Covid Sequencing Team                                                                                                                                                                                                                                                                        |
| EPI_ISL_691487, EPI_ISL_691491                 | Pathogen Genomics Center, National Institute of Infectious Diseases                                                                                                                        | Pathogen Genomics Center, National Institute of Infectious Diseases                                                  | Tsuyoshi Sekizuka, Kentaro Itokawa, Rina Tanaka, Masanori Hashino, Makoto Kuroda                                                                                                                                                                                                                 |
| EPI_ISL_691633                                 | Servicio de Microbiología, Hospital Universitario Son Espases                                                                                                                              | SeqCOVID-SPAIN consortium/IBV(CSIC)                                                                                  | Carla López-Causapé, Jordi Reina, Antonio Oliver and SeqCOVID-SPAIN consortium                                                                                                                                                                                                                   |

|                                                                                                                |                                                                                                                                                                                                                |                                                                                                                                                                                                                                                                                                                                                                             |                                                                                                                                                                                                                                                                                                                                                                                                                                                                                                                                                                                   |
|----------------------------------------------------------------------------------------------------------------|----------------------------------------------------------------------------------------------------------------------------------------------------------------------------------------------------------------|-----------------------------------------------------------------------------------------------------------------------------------------------------------------------------------------------------------------------------------------------------------------------------------------------------------------------------------------------------------------------------|-----------------------------------------------------------------------------------------------------------------------------------------------------------------------------------------------------------------------------------------------------------------------------------------------------------------------------------------------------------------------------------------------------------------------------------------------------------------------------------------------------------------------------------------------------------------------------------|
| EPI_ISL_691708                                                                                                 | Hospital Clínico San Carlos                                                                                                                                                                                    | Instituto de Salud Carlos III                                                                                                                                                                                                                                                                                                                                               | Iglesias-Caballero, M. Camarero, S. Molinero Calamita, M. González-Esguevillas, M. Pozo, F. Casas, I. Jiménez, P. Jiménez, M. Zaballos, A. Monzón, S. Varona, S. Juliá, M. Cuesta, I. Rodríguez, I.                                                                                                                                                                                                                                                                                                                                                                               |
| EPI_ISL_691906, EPI_ISL_692014, EPI_ISL_692564                                                                 | Pathogen Genomics Center, National Institute of Infectious Diseases                                                                                                                                            | Pathogen Genomics Center, National Institute of Infectious Diseases                                                                                                                                                                                                                                                                                                         | Tsuyoshi Sekizuka, Kentaro Itokawa, Rina Tanaka, Masanori Hashino, Makoto Kuroda                                                                                                                                                                                                                                                                                                                                                                                                                                                                                                  |
| EPI_ISL_692741                                                                                                 | CNR Virus des Infections Respiratoires - France SUD                                                                                                                                                            | CNR Virus des Infections Respiratoires - France SUD                                                                                                                                                                                                                                                                                                                         | Antonin Bal, Gregory Destras, Gwendolyne Burfin, Solenne Brun, Martine Valette, Bruno Lina, Laurence Josset                                                                                                                                                                                                                                                                                                                                                                                                                                                                       |
| EPI_ISL_693550, EPI_ISL_693612, EPI_ISL_693615, EPI_ISL_693620, EPI_ISL_693622                                 | Instituto Nacional de Saude (INSA)                                                                                                                                                                             | Instituto Nacional de Saude (INSA)                                                                                                                                                                                                                                                                                                                                          | Borges et al                                                                                                                                                                                                                                                                                                                                                                                                                                                                                                                                                                      |
| EPI_ISL_694321                                                                                                 | TGen North                                                                                                                                                                                                     | TGen North                                                                                                                                                                                                                                                                                                                                                                  | Jolene Bowers, Megan Folkerts, Chris French, Hayley Yaglom, Ashlyn Pfeiffer, Darrin Lemmer, Dave Engelthaler, The Arizona COVID Genomics Union (ACGU)                                                                                                                                                                                                                                                                                                                                                                                                                             |
| EPI_ISL_695809, EPI_ISL_696239                                                                                 | Sonora Quest Laboratories, Laboratory Sciences of Arizona                                                                                                                                                      | TGen North                                                                                                                                                                                                                                                                                                                                                                  | Jolene Bowers, Megan Folkerts, Chris French, Hayley Yaglom, Ashlyn Pfeiffer, Darrin Lemmer, Dave Engelthaler, The Arizona COVID Genomics Union (ACGU)                                                                                                                                                                                                                                                                                                                                                                                                                             |
| EPI_ISL_698110, EPI_ISL_698529, EPI_ISL_698744, EPI_ISL_698934, EPI_ISL_699065, EPI_ISL_699105, EPI_ISL_699130 | Group 42 (G42) Healthcare, Abu Dhabi, United Arab Emirates; Department of Health, The United Arab Emirates                                                                                                     | G42 Healthcare                                                                                                                                                                                                                                                                                                                                                              | Rong Liu, Pei Wu, Sally Mahmoud, Ke Liang, Pauline Ogradzki, Pengjuan Liu, Stephen S. Francis, Tao Ma, Hanif Khalak, Fang Chen, Denghui Liu, Junhua Li, Weibin Liu, Wenjun He, Xinyu Huang, Zhaorong Yuan, Long Lin, Nan Qiao, Xin Meng, Budoor Alqarni, Javier Quilez, Vinay Kusuma, Xin Jin, Xavier Anton, Ashish Koshy, Huanming Yang, Xun Xu, Jian Wang, Peng Xiao, Nawal Ahmed Mohamed Al Kaabi, Mohammed Saifuddin Fashihuddin, Siyang Liu, Walid Abbas Zaher                                                                                                               |
| EPI_ISL_699869, EPI_ISL_700026                                                                                 | Hematopathology Laboratory, ACTREC, TMC                                                                                                                                                                        | Hematopathology Laboratory, ACTREC, TMC                                                                                                                                                                                                                                                                                                                                     | Hematopathology Laboratory, ACTREC                                                                                                                                                                                                                                                                                                                                                                                                                                                                                                                                                |
| EPI_ISL_703089                                                                                                 | Lighthouse Lab in Alderley Park                                                                                                                                                                                | Wellcome Sanger Institute for the COVID-19 Genomics UK (COG-UK) Consortium                                                                                                                                                                                                                                                                                                  | Jacquelyn Wynn, Mairead Hyland, The Lighthouse Lab in Alderley Park and Alex Alderton, Roberto Amato, Sonia Goncalves, Ewan Harrison, David K. Jackson, Ian Johnston, Dominic Kwiatkowski, Cordelia Langford, John Sillitoe on behalf of the Wellcome Sanger Institute COVID-19 Surveillance Team                                                                                                                                                                                                                                                                                 |
| EPI_ISL_705416                                                                                                 | Virology Department, Royal Infirmary of Edinburgh, NHS Lothian / School of Biological Sciences, University of Edinburgh / Institute of Genetics and Molecular Medicine, University of Edinburgh                | COVID-19 Genomics UK (COG-UK) Consortium                                                                                                                                                                                                                                                                                                                                    | McHugh M, Dewar R, Rooke S, Gallagher M, Balcaza C, O'Toole Á, Scher E, Hill V, McCrone JT, Colquhoun R, Yu X, Jackson B, Rambaut A, Williams TC, Templeton K                                                                                                                                                                                                                                                                                                                                                                                                                     |
| EPI_ISL_707782                                                                                                 | CHU Poitiers                                                                                                                                                                                                   | CNR Virus des Infections Respiratoires - France SUD                                                                                                                                                                                                                                                                                                                         | Antonin Bal, Gregory Destras, Gwendolyne Burfin, Hadrien Règue, Quentin Semanas, Martine Valette, Bruno Lina, Agnès Beby-Defaux, Magali Garcia, Clément Jousselin, Nicolas Lévêque, Laurence Josset                                                                                                                                                                                                                                                                                                                                                                               |
| EPI_ISL_707793                                                                                                 | 1-Laboratory of Microbiology, National Reference Lab, Charles Nicolle Hospital; 2-University of Tunis ElManar, Faculty of Medicine of Tunis, LR99ES09, Tunis, Tunisia                                          | 1-Clinical and Experimental Pharmacology Lab, LR16SP02, National Center of Pharmacovigilance, University of Tunis El Manar, Tunis, Tunisia.<br>2-Neurodegenerative diseases and psychiatric troubles, LR18SP03, Razi Hospital, University of Tunis El Manar, Tunis, Tunisia. 3- Ministry of Health, National Observatory of New and Emerging Diseases, 1006, Tunis, Tunisia | Ilhem Boutiba-Ben Boubaker, Sameh Trabelsi, Nissaf Ben Alaya, Maher Kharrat, Alia Ben Kahla, Jaïla Ben Kheilil, Salma Abid, Sana Ferjani, Mouna Ben Sassi, Mouna Safer, Awatef El MOussi, Habiba Ben Romdhane, Souissi Amira, Ines Mдини, Hanen El Jebari, Asma Ferjani, Gales Emna, Riadh Daghfous, Riadh Gouider.                                                                                                                                                                                                                                                               |
| EPI_ISL_707898                                                                                                 | Area of Virology, Serology and Virology Division (SAVID), New South Wales Health Pathology Randwick                                                                                                            | Virology Research Laboratory; Area of Virology, Serology and Virology Division (SAVID), New South Wales Health Pathology Randwick                                                                                                                                                                                                                                           | Foster, C.; Au, J.; Ruiz Silva, M.; Deveson, I.; Bull, R.; Van Hal, S.; Rawlinson, W.                                                                                                                                                                                                                                                                                                                                                                                                                                                                                             |
| EPI_ISL_708148                                                                                                 | Unilabs Laboratory Medicine                                                                                                                                                                                    | Norwegian Institute of Public Health, Department of Virology                                                                                                                                                                                                                                                                                                                | Kathrine Stene-Johansen, Kamilla Heddeland Instefjord, Hilde Elshaug, Marie Paulsen Madsen, Rasmus Riis Kopperud, Hilde Vollan, Karoline Bragstad, Olav Hungnes                                                                                                                                                                                                                                                                                                                                                                                                                   |
| EPI_ISL_708185                                                                                                 | Pamukkale University Hospital                                                                                                                                                                                  | Pamukkale University Department of Medical Genetics                                                                                                                                                                                                                                                                                                                         | Onur TOKGUN et al.                                                                                                                                                                                                                                                                                                                                                                                                                                                                                                                                                                |
| EPI_ISL_709947                                                                                                 | Lighthouse Lab in Milton Keynes                                                                                                                                                                                | Wellcome Sanger Institute for the COVID-19 Genomics UK (COG-UK) Consortium                                                                                                                                                                                                                                                                                                  | The Lighthouse Lab in Milton Keynes and Alex Alderton, Roberto Amato, Sonia Goncalves, Ewan Harrison, David K. Jackson, Ian Johnston, Dominic Kwiatkowski, Cordelia Langford, John Sillitoe on behalf of the Wellcome Sanger Institute COVID-19 Surveillance Team                                                                                                                                                                                                                                                                                                                 |
| EPI_ISL_709984                                                                                                 | Microbiology, Department of Pathology, St. Bernard's Hospital, Gibraltar Health Authority                                                                                                                      | Respiratory Virus Unit, National Infection Service, Public Health England                                                                                                                                                                                                                                                                                                   | PHE Covid Sequencing Team, Dr Nicholas Cortes (Gibraltar), Charlotte Gillborn-Jones (Gibraltar)                                                                                                                                                                                                                                                                                                                                                                                                                                                                                   |
| EPI_ISL_710124                                                                                                 | South Eastern Area Laboratory Services (SEALS)                                                                                                                                                                 | CIDM-PH et al.                                                                                                                                                                                                                                                                                                                                                              | CIDM-PH et al.                                                                                                                                                                                                                                                                                                                                                                                                                                                                                                                                                                    |
| EPI_ISL_710572                                                                                                 | University Hospital Dubrava                                                                                                                                                                                    | Ruer Boškovic Institute; Forensic Science Centre Ivan Vueti; University of Zagreb Faculty of Science                                                                                                                                                                                                                                                                        | Robert Beluži, Marina Korolija, Ana Livun, Vjekoslav Tomai, Dunja Glavaš, Maja Kuzman, Paula Štancl, Lucija Markulin, Lucija Basi, Antonela Blažekovi, Fran Boroveki, Lidija Cvetko-Krajinovi, Ivana elap, Fuad osovi, Mirjana Domazet-Lošo, Tomislav Domazet-Lošo, Valentina umljan-Combaj, Kristina Gotovac Jereti, Jasna Kašman, Vladimir Krajinovi, Danilo Licastro, Boris Maek, Željka Maak Šafranko, Gordana Maravi Vlahoviek, Senica Pejša, Josipa Skelin, Ivan Šamija, Mario Štefanovi, Sanja Tadinac, Katarina Marija Tupek, Petra Vrabc, Rosa Karli, Kristian Vlahoviek |
| EPI_ISL_710576                                                                                                 | VC Sorgenfrimottagningen                                                                                                                                                                                       | The Public Health Agency of Sweden                                                                                                                                                                                                                                                                                                                                          | Department of Microbiology, The Public Health Agency of Sweden                                                                                                                                                                                                                                                                                                                                                                                                                                                                                                                    |
| EPI_ISL_710658                                                                                                 | Lighthouse Lab in Glasgow                                                                                                                                                                                      | Wellcome Sanger Institute for the COVID-19 Genomics UK (COG-UK) Consortium                                                                                                                                                                                                                                                                                                  | Harper VanSteenhouse, Yumi Kasai, David Gray, Carol Clugston, Anna Dominiczak and Alex Alderton, Roberto Amato, Sonia Goncalves, Ewan Harrison, David K. Jackson, Ian Johnston, Dominic Kwiatkowski, Cordelia Langford, John Sillitoe on behalf of the Wellcome Sanger Institute COVID-19 Surveillance Team                                                                                                                                                                                                                                                                       |
| EPI_ISL_711537, EPI_ISL_711731, EPI_ISL_714880                                                                 | Department of Virus and Microbiological Special Diagnostics, Statens Serum Institut, Copenhagen, Denmark                                                                                                       | Albertsen Lab, Department of Chemistry and Bioscience, Aalborg University, Denmark                                                                                                                                                                                                                                                                                          | Danish Covid-19 Genome Consortium                                                                                                                                                                                                                                                                                                                                                                                                                                                                                                                                                 |
| EPI_ISL_717602                                                                                                 | Lab voor klinische biologie                                                                                                                                                                                    | Onderzoeksgroep Virologie                                                                                                                                                                                                                                                                                                                                                   | Nick Vereecke, Laurens Lambrechts, Marthe Pauwels, Bruno Verhasselt, Linos Vandekerckhove, Hans Nauwynck, Sebastiaan Theuns                                                                                                                                                                                                                                                                                                                                                                                                                                                       |
| EPI_ISL_717746                                                                                                 | Kingston Health Sciences Centre and Queen's University                                                                                                                                                         | Ontario Institute for Cancer Research                                                                                                                                                                                                                                                                                                                                       | Prameet M. Sheth, Calvin Sjaarda, Robert Colatt, Katya Douchant, Ilinca Lungu, Bernard Lam, Paul Krzyzanowski, Michael Laszloffy, Lawrence E. Heisler, Richard de Borja, Jared T. Simpson                                                                                                                                                                                                                                                                                                                                                                                         |
| EPI_ISL_717786, EPI_ISL_717795                                                                                 | LACEN RJ - Noel Nutels                                                                                                                                                                                         | Bioinformatics Laboratory / LNCC                                                                                                                                                                                                                                                                                                                                            | Carolina M Voloch, Ronaldo da Silva F Jr, Luiz G P de Almeida, Cynthia C Cardoso, Otavio Bustrolini, Alexandra L Gerber, Ana Paula de C Guimarães, Diana Mariani, Andréa Cony Cavalcanti, Claudia dos Santos Rodrigues, Terezinha M P P Castiñeira, Amílcar Tanuri, Ana Tereza R de Vasconcelos                                                                                                                                                                                                                                                                                   |
| EPI_ISL_717806, EPI_ISL_717824, EPI_ISL_717920, EPI_ISL_717930, EPI_ISL_717960                                 | Laboratorio de Virologia Molecular / UFRJ                                                                                                                                                                      | Bioinformatics Laboratory / LNCC                                                                                                                                                                                                                                                                                                                                            | Carolina M Voloch, Ronaldo da Silva F Jr, Luiz G P de Almeida, Cynthia C Cardoso, Otavio Bustrolini, Alexandra L Gerber, Ana Paula de C Guimarães, Diana Mariani, Andréa Cony Cavalcanti, Claudia dos Santos Rodrigues, Terezinha M P P Castiñeira, Amílcar Tanuri, Ana Tereza R de Vasconcelos                                                                                                                                                                                                                                                                                   |
| EPI_ISL_717965, EPI_ISL_717970                                                                                 | Molecular diagnostic laboratory of Federal Budget Institution of Science "Central Research Institute of Epidemiology" of The Federal Service on Customers' Rights Protection and Human Well-being Surveillance | Group of Genomics and Postgenomic Technologies of Central Research Institute of Epidemiology                                                                                                                                                                                                                                                                                | Samoilov AE, Kaptelova VV, Dudorova AV, Korneenko EV, Speranskaya AS, Tivanova EV, Shipulina OY, Akimkin VG                                                                                                                                                                                                                                                                                                                                                                                                                                                                       |
| EPI_ISL_718030                                                                                                 | ZOTZ KLIMAS MVZ Düsseldorf-Centrum GbR ÜBAG für Labormedizin, Genetik, Zytologie, Pathologie                                                                                                                   | Center of Medical Microbiology, Virology, and Hospital Hygiene, University of Duesseldorf                                                                                                                                                                                                                                                                                   | Maximilian Damagnez, Alexander Dilthey, Ashley-Jane Duplessis, Patrick Finzer, Katrin Hoffmann, Torsten Houwaart, Lisanna Hülse, Malte Kohns Vasconcelos, Marek Korencak, Nadine Lübke, Jessica Nicolai, Klaus Pfeffer, Daniel Strelow, Jörg Timm, Andreas Walker, Tobias Wienemann, Rainer Zotz                                                                                                                                                                                                                                                                                  |
| EPI_ISL_718240                                                                                                 | Hospital                                                                                                                                                                                                       | National Reference Center for Viruses of Respiratory Infections, Institut Pasteur, Paris                                                                                                                                                                                                                                                                                    | Marion Barbet, Sylvie Behillil, Méline Bizard, Angela Brisebarre, Camille Capel, Etienne Simon-Lorière, Vincent Enouf, Maud Vanpeene, Sylvie van der Werf, Gisèle Lagathu                                                                                                                                                                                                                                                                                                                                                                                                         |
| EPI_ISL_718259                                                                                                 | Institute of Virology, Biomedical Research Center of the Slovak Academy of Sciences, Bratislava                                                                                                                | Faculty of Natural Sciences, Comenius University, Bratislava                                                                                                                                                                                                                                                                                                                | Broa Břejová, Viktória Hodorová, Kristína Bořová, Viktória abanová, Sabina Fumaová Havlíková, Juraj Kopáek, Martina Liková, ubomíra Lukáiková, Martina Nebóháová, Monika Sláviková, Tomáš Vína, Jozef Nosek, Boris Klempa                                                                                                                                                                                                                                                                                                                                                         |
| EPI_ISL_718271                                                                                                 | Institute for Medical Research, Infectious Disease                                                                                                                                                             | Institute for Medical Research, Infectious Disease                                                                                                                                                                                                                                                                                                                          | Suppiah J, Kamel K, Mohd-Zawawi Z, Thayan R                                                                                                                                                                                                                                                                                                                                                                                                                                                                                                                                       |

|                                                                                                                |                                                                                                                            |                                                                                                                                                           |                                                                                                                                                                                                                                                                                                                                                                                                                                                                                                   |
|----------------------------------------------------------------------------------------------------------------|----------------------------------------------------------------------------------------------------------------------------|-----------------------------------------------------------------------------------------------------------------------------------------------------------|---------------------------------------------------------------------------------------------------------------------------------------------------------------------------------------------------------------------------------------------------------------------------------------------------------------------------------------------------------------------------------------------------------------------------------------------------------------------------------------------------|
| EPI_ISL_720650, EPI_ISL_720908                                                                                 | Research Centre, National Institutes of Health, Ministry of Health Malaysia<br>Lighthouse Lab in Milton Keynes             | Research Centre, National Institutes of Health, Ministry of Health Malaysia<br>Wellcome Sanger Institute for the COVID-19 Genomics UK (COG-UK) Consortium | The Lighthouse Lab in Milton Keynes and Alex Alderton, Roberto Amato, Sonia Goncalves, Ewan Harrison, David K. Jackson, Ian Johnston, Dominic Kwiatkowski, Cordelia Langford, John Sillitoe on behalf of the Wellcome Sanger Institute COVID-19 Surveillance Team                                                                                                                                                                                                                                 |
| EPI_ISL_721511                                                                                                 | Lighthouse Lab in Alderley Park                                                                                            | Wellcome Sanger Institute for the COVID-19 Genomics UK (COG-UK) Consortium                                                                                | Jacquelyn Wynn, Mairead Hyland, The Lighthouse Lab in Alderley Park and Alex Alderton, Roberto Amato, Sonia Goncalves, Ewan Harrison, David K. Jackson, Ian Johnston, Dominic Kwiatkowski, Cordelia Langford, John Sillitoe on behalf of the Wellcome Sanger Institute COVID-19 Surveillance Team                                                                                                                                                                                                 |
| EPI_ISL_721617                                                                                                 | Pathogen Genomics Center, National Institute of Infectious Diseases                                                        | Pathogen Genomics Center, National Institute of Infectious Diseases                                                                                       | Tsuyoshi Sekizuka, Kentaro Itokawa, Rina Tanaka, Masanori Hashino, Makoto Kuroda                                                                                                                                                                                                                                                                                                                                                                                                                  |
| EPI_ISL_721721, EPI_ISL_721764                                                                                 | Viollier AG                                                                                                                | Department of Biosystems Science and Engineering, ETH Zürich                                                                                              | Christian Beisel                                                                                                                                                                                                                                                                                                                                                                                                                                                                                  |
| EPI_ISL_722039                                                                                                 | Hospital das Clínicas Universidade de São Paulo Medical School                                                             | Laboratório de Parasitologia Médica - Instituto de Medicina Tropical - Universidade de São Paulo                                                          | Brazil-UK Centre for Arbovirus Discovery Diagnosis Genomics and Epidemiology (CADDE) Genomic Network - Instituto de Medicina Tropical                                                                                                                                                                                                                                                                                                                                                             |
| EPI_ISL_722145, EPI_ISL_722148, EPI_ISL_722151, EPI_ISL_722164                                                 | DB Diagnosticos do Brasil                                                                                                  | Laboratório de Parasitologia Médica - Instituto de Medicina Tropical - Universidade de São Paulo                                                          | Brazil-UK Centre for Arbovirus Discovery Diagnosis Genomics and Epidemiology (CADDE) Genomic Network - Instituto de Medicina Tropical                                                                                                                                                                                                                                                                                                                                                             |
| EPI_ISL_722238                                                                                                 | Servicio de Microbiología. Hospital General Universitario de Castellón                                                     | SeqCOVID-SPAIN consortium/IBV(CSIC)                                                                                                                       | Rosario Moreno Muñoz, María Dolores Tirado Balaguer and SeqCOVID-SPAIN consortium                                                                                                                                                                                                                                                                                                                                                                                                                 |
| EPI_ISL_723347                                                                                                 | Dutch COVID-19 response team                                                                                               | National Institute for Public Health and the Environment (RIVM)                                                                                           | Adam Meijer, Harry Vennema, Jeroen Cremer, Sharon van den Brink, Bas van der Veer, AnneMarie van den Brandt, Florian Zwagemaker, Dennis Schmitz, Chantal Reusken, on behalf of the national COVID-19 response team                                                                                                                                                                                                                                                                                |
| EPI_ISL_723515                                                                                                 | Virginia Division of Consolidated Laboratory Services (DCLS)                                                               | Virginia Division of Consolidated Laboratory Services (DCLS)                                                                                              | Virginia DCLS                                                                                                                                                                                                                                                                                                                                                                                                                                                                                     |
| EPI_ISL_724137, EPI_ISL_725129                                                                                 | Quadram Institute Bioscience                                                                                               | COVID-19 Genomics UK (COG-UK) Consortium                                                                                                                  | Dave J. Baker, Gemma L. Kay, Alp Aydin, Thanh Le-Viet, Steven Rudder, Ana P. Tedim, Anastasia Kolyva, Maria Diaz, Leonardo de Oliveira Martins, Nabil-Fareed Alikhan, Lizzie Meadows, Rachael Stanley, Ngozi Elumogo, Muhammed Yasir, Nicholas M. Thomson, Alexander J Trotter, Rachel Gilroy, Samuel Bloomfield, Claire Stuart, Andrew Bell, Reenesh Prakash, Samir Dervisevic, Alison E. Mather, John Wain, Mark Webber, Andrew J. Page, Justin O'Grady                                         |
| EPI_ISL_727717                                                                                                 | Centre for Enzyme Innovation, University of Portsmouth / Translational Research Laboratory, Portsmouth Hospitals NHS Trust | COVID-19 Genomics UK (COG-UK) Consortium                                                                                                                  | Angela Beckett, Yann Bourgeois, Garry Scarlett, Sharon Glaysher, Scott Elliott, Kelly Bicknell, Robert Impey, Allyson Lloyd, Sarah Wyllie, Ethan Butcher, Anoop Chauhan, Samuel Robson                                                                                                                                                                                                                                                                                                            |
| EPI_ISL_728183                                                                                                 | National Public Health Laboratory, National Centre for Infectious Diseases                                                 | National Public Health Laboratory, National Centre for Infectious Diseases                                                                                | Tze Minn Mak, Sophie Octavia, Zhenyang Zhou, Lin Cui, Raymond Tzer Pin Lin                                                                                                                                                                                                                                                                                                                                                                                                                        |
| EPI_ISL_728303                                                                                                 | Jena University Hospital, Institute for Infectious Diseases and Infection Control                                          | Institute of infectious medicine & hospital hygiene, CaSe-Group                                                                                           | Spott, Riccardo; Marquet, Mike; Pletz, Matthias W.; Brandt, Christian                                                                                                                                                                                                                                                                                                                                                                                                                             |
| EPI_ISL_728344                                                                                                 | Laboratoire Biolife                                                                                                        | Laboratoire de Biotechnologie                                                                                                                             | Mouna Ouadghiri, Tarik Aanniz, Mohammed Walid Chemaou Elfhiri, Mohamed Chenaoui, Hanae Dakka, Afaf Alaoui, Otmane Touzani, Bouchra Belfquih, Lahcen belyamani, Saaid Amzazi and Azeddine Ibrahim                                                                                                                                                                                                                                                                                                  |
| EPI_ISL_728560                                                                                                 | Institute for Urban Disease Control and Prevention                                                                         | COVID-19 Network Investigations (CONI) Alliance                                                                                                           | Kamolthip Atsawawaranunt, Elizabeth Batty, Wasun Chantratita, Thanat Chookajorn, Stefan Fernandez, Angkana Huang, Anthony R. Jones, Khajohn Joonsalak, Chonticha Klungtong, Theerarat Kochakorn, Prayuth Kaewmalang, Amornmas Kongklieng, Namfon Kotanan, Krittikorn Kumpornsin, Wudtichai Manasatienkij, Anek Mungaomklang, Bhakhoorn Panthan, Pukkaporn Parnwijitkul, Ekawat Pasomsub, Kingkan Rakmanee, Insee Sensorn, Janjira Thaipadungpanit, Arporn Wangwiwatsin, Treewat Watthanachockchai |
| EPI_ISL_728706                                                                                                 | Dutch COVID-19 response team                                                                                               | National Institute for Public Health and the Environment (RIVM)                                                                                           | Adam Meijer, Harry Vennema, Jeroen Cremer, Sharon van den Brink, Bas van der Veer, AnneMarie van den Brandt, Florian Zwagemaker, Dennis Schmitz, Chantal Reusken, on behalf of the national COVID-19 response team                                                                                                                                                                                                                                                                                |
| EPI_ISL_728835                                                                                                 | Viollier AG                                                                                                                | Department of Biosystems Science and Engineering, ETH Zürich                                                                                              | Chaoran Chen, Sarah Nadeau, Catharine Aquino, Ivan Topolsky, Pedro Ferreira, Philipp Jablonski, Susana Posada-Céspedes, Andreia Cabral de Gouvea, Maria Domenica Moccia, Simon Grüter, Timothy Sykes, Lennart Opitz, Ralph Schlapbach, Christiane Beckmann, Maurice Redondo, Olivier Kobel, Christoph Noppen, Sophie Seidel, Noemie Santamaria de Souza, Niko Beerenwinkel, Tanja Stadler                                                                                                         |
| EPI_ISL_729340                                                                                                 | A. Krumbholz, Labor Dr. Krause und Kollegen MVZ GmbH, Kiel                                                                 | Charité Universitätsmedizin Berlin, Institut für Virologie                                                                                                | Victor M Corman, Barbara Mühlemann, Jörn Beheim-Schwarzbach, Talitha Veith, Julia Schneider, Terry Jones, Christian Drosten                                                                                                                                                                                                                                                                                                                                                                       |
| EPI_ISL_729353                                                                                                 | Charité Universitätsmedizin Berlin, Institut für Virologie/Labor Berlin                                                    | Charité Universitätsmedizin Berlin, Institut für Virologie                                                                                                | Victor M Corman, Barbara Mühlemann, Jörn Beheim-Schwarzbach, Talitha Veith, Julia Schneider, Terry Jones, Christian Drosten                                                                                                                                                                                                                                                                                                                                                                       |
| EPI_ISL_729620, EPI_ISL_729725                                                                                 | A. Krumbholz, Labor Dr. Krause und Kollegen MVZ GmbH, Kiel                                                                 | Charité Universitätsmedizin Berlin, Institut für Virologie                                                                                                | Victor M Corman, Barbara Mühlemann, Jörn Beheim-Schwarzbach, Talitha Veith, Julia Schneider, Terry Jones, Christian Drosten                                                                                                                                                                                                                                                                                                                                                                       |
| EPI_ISL_729778                                                                                                 | Connecticut Department of Health                                                                                           | Grubaugh Lab - Yale School of Public Health                                                                                                               | Joseph Fauver, Tara Alpert, Anderson Brito, Annie Watkins, Anne Wyllie, Chantal Vogels, Mary Petrone, Chaney Kalinich, Isabel Ott, Arnao Casanovas, Catherine Muenker, Adam Moore, Alice Lu, Maria Tokuyama, Patrick Wong, Peiwen Lu, Saad Omer, Richard Martinello, Allison Nelson, Shelli Farhadian, Akiko Iwasaki, Charlese Dela Cruz, Albert Ko, Nathan Grubaugh                                                                                                                              |
| EPI_ISL_729811, EPI_ISL_729822, EPI_ISL_729834, EPI_ISL_729835, EPI_ISL_729845, EPI_ISL_729848, EPI_ISL_729859 | Laboratorio Central de Saude Publica do Estado do Rio Grande do Sul (LACEN-RS)                                             | Laboratory of Respiratory Viruses and Measles, Oswaldo Cruz Institute, FIOCRUZ                                                                            | Paola Resende, Luciana Appolinario, Fernando Motta, Anna Carolina Paixão, Ana Carolina Mendonça, Tatiana Schaffer Gregianini, Marilda Tereza Mar da Rosa, Marilda Siqueira                                                                                                                                                                                                                                                                                                                        |
| EPI_ISL_729868                                                                                                 | Laboratorio de Referencia Nacional de Virus Respiratorios, Instituto Nacional de Salud Peru                                | Laboratorio de Genómica Microbiana, Universidad Peruana Cayetano Heredia                                                                                  | Pablo Tsukayama, Alejandra Dávila-Barclay, Luis González, Guillermo Salvatierra, Pedro E. Romero, Brenda Ayzanoa, Janet Huancachoque, Pool Marcos, Marco Galarza, Priscila Lope, Nancy Rojas                                                                                                                                                                                                                                                                                                      |
| EPI_ISL_729905, EPI_ISL_729919                                                                                 | Instituto de Medicina Tropical, Universidad Nacional Toribio Rodríguez de Mendoza de Amazonas                              | Laboratorio de Genómica Microbiana, Universidad Peruana Cayetano Heredia                                                                                  | Pablo Tsukayama, Alejandra Dávila-Barclay, Luis González, Pedro E. Romero, Brenda Ayzanoa, Janet Huancachoque, Pool Marcos, Stella Chenet, Rafael Tapia, Cecilia Pajuelo, Carla Montenegro                                                                                                                                                                                                                                                                                                        |

We gratefully acknowledge the following Authors from the Originating laboratories responsible for obtaining the specimens, as well as the Submitting laboratories where the genome data were generated and shared via GISAIID, on which this research is based.

All Submitters of data may be contacted directly via [www.gisaid.org](http://www.gisaid.org)

| Accession ID                   | Originating Laboratory                                                                                                                                                                                              | Submitting Laboratory                                                                                                      | Authors                                                                                                                                                                                                                                                                                                                                                                                                                                                                                                                                                                                                                                                                                                                                                                                   |
|--------------------------------|---------------------------------------------------------------------------------------------------------------------------------------------------------------------------------------------------------------------|----------------------------------------------------------------------------------------------------------------------------|-------------------------------------------------------------------------------------------------------------------------------------------------------------------------------------------------------------------------------------------------------------------------------------------------------------------------------------------------------------------------------------------------------------------------------------------------------------------------------------------------------------------------------------------------------------------------------------------------------------------------------------------------------------------------------------------------------------------------------------------------------------------------------------------|
| EPI_ISL_412912                 | State Health Office Baden-Württemberg                                                                                                                                                                               | Charite Universitätsmedizin Berlin, Institute of Virology                                                                  | Victor M Corman, Julia Schneider, Barbara Muhlemann, Talitha Veith, Jörn Beheim-Schwarzbach, Terry Jones, Rainer Oehme, Silke Fischer, Christian Drosten                                                                                                                                                                                                                                                                                                                                                                                                                                                                                                                                                                                                                                  |
| EPI_ISL_412972                 | Instituto Nacional de Enfermedades Respiratorias                                                                                                                                                                    | Instituto de Diagnostico y Referencia Epidemiologicos (INDRE)                                                              | Ramirez-Gonzalez Ernesto, Garces-Ayala Fabiola, Araiza-Rodriguez Adnan, Mendieta-Condado Edgar, Rodriguez-Maldonado Abril, Wong-Arambula Claudia, Vazquez-Perez Joel, Martinez Arturo, Boukadida Celia, Munoz-Medina Esteban, Sanchez Alejandro, Isa Pavel, Taboada Blanca, Lopez Susana, Arias Carlos, Barrera-Badillo Gisela, Hernandez-Rivas Lucia, Lopez-Martinez Irma                                                                                                                                                                                                                                                                                                                                                                                                                |
| EPI_ISL_413020                 | Department of Internal Medicine, Triemli Hospital                                                                                                                                                                   | Institute of Medical Virology, University of Zurich                                                                        | Stefan Schmutz, Maryam Zaheri, Verena Kufner, Patrick Redli, Fiona Steiner, Jon Huder, Riccardo Capaul, Andrea Zbinden, Jürg Böni, Michael Huber, Gerhard Eich, Alexandra Trkola                                                                                                                                                                                                                                                                                                                                                                                                                                                                                                                                                                                                          |
| EPI_ISL_413221                 | West of Scotland Specialist Virology Centre, NHSGGC                                                                                                                                                                 | MRC-University of Glasgow Centre for Virus Research                                                                        | Emma Thomson, Antonia Ho; James Shephard, Shirin Ashraf; Kathy Smollett, Daniel Mair, Stephen Carmichael, Ana da Silva Filipe; Richard Orton, Josh Singer, David L Robertson; Andrew Rambaut; Alasdair MacLean, Rory Gunson.                                                                                                                                                                                                                                                                                                                                                                                                                                                                                                                                                              |
| EPI_ISL_413550                 | Centre for Human and Zoonotic Virology (CHAZVY), College of Medicine University of Lagos/Lagos University Teaching Hospital (LUTH), part of the Laboratory Network of the Nigeria Centre for Disease Control (NCDC) | African Centre of Excellence for Genomics of Infectious Diseases (ACEGID), Redeemer's University, Ede, Osun State, Nigeria | Otunji P.E., Ajogbasile F.V., Kayode A., Oguzie J., Folarin O.A., Ihekweazu C. Happi C.T.                                                                                                                                                                                                                                                                                                                                                                                                                                                                                                                                                                                                                                                                                                 |
| EPI_ISL_413570                 | RIVM                                                                                                                                                                                                                | Erasmus Medical Center                                                                                                     | David Nieuwenhuijse, Bas Oude Munnink, Reina Sikkema, Claudia Schapendonk, Irina Chestakova, Anne van der Linden, Mark Pronk, Pascal Lexmond, Corien Swaan, Manon Haverkate, Madelief Mollers, Mart Stein, Sandra Kenge Kamga Mobou, Jeroen van Kampen, Jolanda Voermans, Aura Timen, Corine Geurtsvankessel, Annemiek van der Eijk, Richard Molenkamp, Marion Koopmans, on behalf of the Dutch national COVID-19 response team.                                                                                                                                                                                                                                                                                                                                                          |
| EPI_ISL_414488                 | Wales Specialist Virology Centre                                                                                                                                                                                    | Public Health Wales Microbiology Cardiff                                                                                   | Catherine Moore, Joanne Watkins, Sally Corden, Tom Connor                                                                                                                                                                                                                                                                                                                                                                                                                                                                                                                                                                                                                                                                                                                                 |
| EPI_ISL_415703                 | University Hospitals of Geneva Laboratory of Virology                                                                                                                                                               | University Hospitals of Geneva Laboratory of Virology                                                                      | Laubscher F.                                                                                                                                                                                                                                                                                                                                                                                                                                                                                                                                                                                                                                                                                                                                                                              |
| EPI_ISL_415787                 | Laboratorio de Referencia Nacional de Virus Respiratorio. Instituto Nacional de Salud. Peru                                                                                                                         | Laboratorio de Referencia Nacional de Biotecnología y Biología Molecular. Instituto Nacional de Salud. Peru                | Carlos Padilla Rojas, Priscila Lope Pari, Karolyn Vega Chozo, Johanna Balbuena Torres, Omar Caceres Rey, Hemri Bailon Calderon, Maribel Huaranga Nuñez, Nancy Rojas Serrano                                                                                                                                                                                                                                                                                                                                                                                                                                                                                                                                                                                                               |
| EPI_ISL_416028                 | National Influenza Center - Instituto Adolfo Lutz                                                                                                                                                                   | Instituto Adolfo Lutz, Interdisciplinary Procedures Center, Strategic Laboratory                                           | Claudio Tavares Sacchi, Claudia Regina Gonçalves, Carlos Henrique Camargo, Fabiana Cristina Pereira dos Santos, Daniela Bernardes Borges da Silva, Simone Guadagnucci Morillo, Adriano Abbud, Adriana Bugno, Maria do Carmo Sampaio Tavares Timenetsky, Terezinha Maria de Paiva                                                                                                                                                                                                                                                                                                                                                                                                                                                                                                          |
| EPI_ISL_416029                 | Laboratório Fleury                                                                                                                                                                                                  | Instituto Adolfo Lutz, Interdisciplinary Procedures Center, Strategic Laboratory                                           | Claudio Tavares Sacchi, Claudia Regina Gonçalves, Carlos Henrique Camargo, Fabiana Cristina Pereira dos Santos, Daniela Bernardes Borges da Silva, Simone Guadagnucci Morillo, Adriano Abbud, Adriana Bugno, Maria do Carmo Sampaio Tavares Timenetsky, Terezinha Maria de Paiva                                                                                                                                                                                                                                                                                                                                                                                                                                                                                                          |
| EPI_ISL_416034                 | Hospital Israelita Albert Einstein                                                                                                                                                                                  | Instituto Adolfo Lutz, Interdisciplinary Procedures Center, Strategic Laboratory                                           | Claudio Tavares Sacchi, Claudia Regina Gonçalves, Carlos Henrique Camargo, Erica Valessa Ramos Gomes, Fabiana Cristina Pereira dos Santos, Daniela Bernardes Borges da Silva, Simone Guadagnucci Morillo, Adriano Abbud, Adriana Bugno, Maria do Carmo Sampaio Tavares Timenetsky, Terezinha Maria de Paiva                                                                                                                                                                                                                                                                                                                                                                                                                                                                               |
| EPI_ISL_416035                 | National Influenza Center - Instituto Adolfo Lutz                                                                                                                                                                   | Instituto Adolfo Lutz, Interdisciplinary Procedures Center, Strategic Laboratory                                           | Claudio Tavares Sacchi, Claudia Regina Gonçalves, Carlos Henrique Camargo, Erica Valessa Ramos Gomes, Fabiana Cristina Pereira dos Santos, Daniela Bernardes Borges da Silva, Simone Guadagnucci Morillo, Adriano Abbud, Adriana Bugno, Maria do Carmo Sampaio Tavares Timenetsky, Terezinha Maria de Paiva                                                                                                                                                                                                                                                                                                                                                                                                                                                                               |
| EPI_ISL_416431                 | National Influenza Center, National Institute of Hygiene and Epidemiology (NIHE)                                                                                                                                    | National Influenza Center, National Institute of Hygiene and Epidemiology (NIHE)                                           | Le Quynh Mai, Taichiro Takemura, Meng Ling Moi, Takeshi Nabeshima, Nguyen Le Khanh Hang, Hoang Vu Mai Phuong, Ung Thi Hong Trang, Le Thi Thanh, Nguyen Vu Son, Vuong Duc Cuong, Pham Thi Hien, Tran Thu Huong, Nguyen Phuong Anh, Pham Hong Quynh Anh, Kouichi Morita, Futoshi Hasebe, Dang Duc Anh                                                                                                                                                                                                                                                                                                                                                                                                                                                                                       |
| EPI_ISL_416467                 | KU Leuven, Clinical and Epidemiological Virology                                                                                                                                                                    | KU Leuven, Clinical and Epidemiological Virology                                                                           | Bert Vanmechelen, Tony Wawina, Joan Marti-Carreras, Piet Maes                                                                                                                                                                                                                                                                                                                                                                                                                                                                                                                                                                                                                                                                                                                             |
| EPI_ISL_417196                 | Minnesota Department of Health, Public Health Laboratory                                                                                                                                                            | Minnesota Department of Health, Public Health Laboratory                                                                   | Matt Plumb, Jake Garfin and Xiong Wang                                                                                                                                                                                                                                                                                                                                                                                                                                                                                                                                                                                                                                                                                                                                                    |
| EPI_ISL_417232                 | Respiratory Virus Unit, Microbiology Services Colindale, Public Health England                                                                                                                                      | Respiratory Virus Unit, Microbiology Services Colindale, Public Health England                                             | Monica Galiano, Shahjahan Miah, Angie Lackenby, Omolola Akinbami, Tiina Talts, Leena Bhaw, Richard Myers, Steven Platt, Kirstin Edwards, Jonathan Hubb, Joanna Ellis, Maria Zambon                                                                                                                                                                                                                                                                                                                                                                                                                                                                                                                                                                                                        |
| EPI_ISL_417734, EPI_ISL_417768 | The National University Hospital of Iceland                                                                                                                                                                         | deCODE genetics                                                                                                            | Daniel F Gudbjartsson; Agnar Helgason; Hakon Jonsson; Olafur T Magnusson; Pall Melsted; Gudmundur L Norddahi; Jona Saemundsdottir; Asgeir Sigurdsson; Patrick Sulem; Arna B Agustsdottir; Berglind Eriksdottir; Run Fridriksdottir; Elisabet E Gardarsdottir; Gudmundur Georgsson; Olafia S Gretarsdottir; Kjartan R Gudmundsson; Thora R Gunnarsdottir; Arnaldur Gylfason; Hilma Holm; Brynjar O Jensson; Aslaug Jonasdottir; Kamilla S Josefsdottir; Thordur Kristjansson; Droplaug N Magnusdottir; Louise le Roux; Gudrun Sigmundsdottir; Gardar Sveinbjornsson; Kristin E Sveinsdottir; Maney Sveinsdottir; Emil A Thorarensen; Bjarni Thorbjornsson; Gisli Masson; Ingileif Jonsdottir; Alma Moller; Thorolfur Gudnason; Karl G Kristinsson; Unnur Thorsteinsdottir; Kari Stefansson |
| EPI_ISL_417922                 | INMI Lazzaro Spallanzani IRCCS                                                                                                                                                                                      | Laboratory of Virology, INMI Lazzaro Spallanzani IRCCS                                                                     | Cesare E. M. Gruber, Martina Rueca, Barbara Bartolini, Francesco Messina, Emanuela Giombini, Maria R. Capobianchi, Fabrizio Carletti, Francesca Colavita, Concetta Castilletti, Eleonora Lalle, Daniele Lapa, Giuseppe Ippolito.                                                                                                                                                                                                                                                                                                                                                                                                                                                                                                                                                          |
| EPI_ISL_417933                 | UCSF Clinical Microbiology Laboratory                                                                                                                                                                               | Chan-Zuckerberg Biohub                                                                                                     | Shaun Arevalo, Josh Batson, Olga Botvinnik, Gloria Castaneda, Angela Detweiler, David Dnyerman, Samantha Hao, Jack Kamm, Amy Kistler, G. Renuka Kumar, Chaz Langelier, Lucy Li, Steve Miller, Lusajo Mwakibete, Norma Neff, Angela Pisco, Maira Phelps, Michelle Tan, Chunyu Zhao                                                                                                                                                                                                                                                                                                                                                                                                                                                                                                         |
| EPI_ISL_418002                 | CHU Coimbra                                                                                                                                                                                                         | Instituto Nacional de Saude (INSA)                                                                                         | Guiomar et al                                                                                                                                                                                                                                                                                                                                                                                                                                                                                                                                                                                                                                                                                                                                                                             |
| EPI_ISL_418007                 | H Braga                                                                                                                                                                                                             | Instituto Nacional de Saude (INSA)                                                                                         | Guiomar et al                                                                                                                                                                                                                                                                                                                                                                                                                                                                                                                                                                                                                                                                                                                                                                             |
| EPI_ISL_418023                 | H Evora                                                                                                                                                                                                             | Instituto Nacional de Saude (INSA)                                                                                         | Guiomar et al                                                                                                                                                                                                                                                                                                                                                                                                                                                                                                                                                                                                                                                                                                                                                                             |
| EPI_ISL_418235                 | Cabinet médical                                                                                                                                                                                                     | National Reference Center for Viruses of Respiratory Infections, Institut Pasteur, Paris                                   | Mélanie Albert, Marion Barbet, Sylvie Behillil, Méline Bizard, Angela Brisebarre, Flora Donati, Etienne Simon-Lorière, Vincent Enouf, Maud Vanpeene, Sylvie van der Werf                                                                                                                                                                                                                                                                                                                                                                                                                                                                                                                                                                                                                  |
| EPI_ISL_418250                 | HOSPITAL CLINIC                                                                                                                                                                                                     | Instituto de Salud Carlos III                                                                                              | Iglesias-Caballero, M. Molinero Calamita, M. González-Esguevillas, M. Camarero, S. Pozo, F. Casas, I. Jiménez, P. Jiménez, M. Zaballos, A. Monzón, S. Varona, S. Juliá, M. Cuesta, I. Marcos M.A                                                                                                                                                                                                                                                                                                                                                                                                                                                                                                                                                                                          |
| EPI_ISL_418256                 | Ospedale "San Liberatore" di Atri                                                                                                                                                                                   | Istituto Zooprofilattico Sperimentale dell'Abruzzo e Molise "G. Caporale"                                                  | Lorusso A, Marcacci M, Di Domenico M, Puglia I, Curini V, Ancora M, Di Pasquale A, Rinaldi A, Mangone I, Cammà C, Savini G.                                                                                                                                                                                                                                                                                                                                                                                                                                                                                                                                                                                                                                                               |
| EPI_ISL_418428                 | Centre Hospitalier Lucien Husel                                                                                                                                                                                     | CNR Virus des Infections Respiratoires - France SUD                                                                        | Antonin Bal, Gregory Destras, Gwendolyne Burfin, Solenne Brun, Carine Moustaud, Raphaëlle Lamy, Alexandre Gaymard, Maude Bouscambert-Duchamp, Florence Morfin-Sherpa, Martine Valette, Bruno Lina, Laurence Josset                                                                                                                                                                                                                                                                                                                                                                                                                                                                                                                                                                        |

|                                                                                                |                                                                                                                                                                                                 |                                                                                                                                                                         |                                                                                                                                                                                                                                                                                                                                                                                                                                                                                                                                                                                                                                                                                                                                                                                            |
|------------------------------------------------------------------------------------------------|-------------------------------------------------------------------------------------------------------------------------------------------------------------------------------------------------|-------------------------------------------------------------------------------------------------------------------------------------------------------------------------|--------------------------------------------------------------------------------------------------------------------------------------------------------------------------------------------------------------------------------------------------------------------------------------------------------------------------------------------------------------------------------------------------------------------------------------------------------------------------------------------------------------------------------------------------------------------------------------------------------------------------------------------------------------------------------------------------------------------------------------------------------------------------------------------|
| EPI_ISL_418580                                                                                 | UCD National Virus Reference Laboratory                                                                                                                                                         | UCD National Virus Reference Laboratory                                                                                                                                 | Michael Carr, Gabriel Gonzalez, Jonathan Dean, Suzie Coughlan, Alison Murphy, Kevin Byrne, Ken Wolfe, Jeff Connell, Brendan Loftus, Cillian F De Gascun                                                                                                                                                                                                                                                                                                                                                                                                                                                                                                                                                                                                                                    |
| EPI_ISL_418681                                                                                 | Respiratory Virus Unit, Microbiology Services Colindale, Public Health England                                                                                                                  | Respiratory Virus Unit, Microbiology Services Colindale, Public Health England                                                                                          | Monica Galiano, Shahjahan Miah, Angie Lackenby, Omolola Akinbami, Tiina Talts, Leena Bhaw, Richard Myers, Steven Platt, Kirstin Edwards, Jonathan Hubb, Joanna Ellis, Maria Zambon                                                                                                                                                                                                                                                                                                                                                                                                                                                                                                                                                                                                         |
| EPI_ISL_419914, EPI_ISL_419933                                                                 | Victorian Infectious Diseases Reference Laboratory (VIDRL)                                                                                                                                      | Victorian Infectious Diseases Reference Laboratory and Microbiological Diagnostic Unit Public Health Laboratory, Doherty Institute                                      | Caly L., Seemann T., Sait, M., Schultz M., Druce J., Sherry, N.                                                                                                                                                                                                                                                                                                                                                                                                                                                                                                                                                                                                                                                                                                                            |
| EPI_ISL_420153                                                                                 | University Hospital of Northern Norway, Department for Microbiology and Infectious Disease Control                                                                                              | Norwegian Institute of Public Health, Department of Virology                                                                                                            | Kathrine Stene-Johansen, Kamilla Heddeland Instefjord, Hilde Elshaug, Karoline Bragstad, Olav Hungnes                                                                                                                                                                                                                                                                                                                                                                                                                                                                                                                                                                                                                                                                                      |
| EPI_ISL_420475, EPI_ISL_420762                                                                 | Respiratory Virus Unit, Microbiology Services Colindale, Public Health England                                                                                                                  | Respiratory Virus Unit, Microbiology Services Colindale, Public Health England                                                                                          | Monica Galiano, Shahjahan Miah, Angie Lackenby, Omolola Akinbami, Tiina Talts, Leena Bhaw, Richard Myers, Steven Platt, Kirstin Edwards, Jonathan Hubb, Joanna Ellis, Maria Zambon                                                                                                                                                                                                                                                                                                                                                                                                                                                                                                                                                                                                         |
| EPI_ISL_420785                                                                                 | FL Bureau of Health Laboratories Tampa                                                                                                                                                          | Pathogen Discovery, Respiratory Viruses Branch, Division of Viral Diseases, Centers for Disease Control and Prevention                                                  | Krista Queen, Yan Li, Ying Tao, Jing Zhang, Anne Uehara, Clinton R. Paden, Haibin Wang, Rachel Marine, Mary S. Keckler, Alison S. Laufer Halpin, Jasmine Padilla, Justin Lee, Christopher A. Elkins, Suxiang Tong                                                                                                                                                                                                                                                                                                                                                                                                                                                                                                                                                                          |
| EPI_ISL_420900                                                                                 | Max von Pettenkofer Institute, Virology, National Reference Center for Retroviruses, LMU Munich                                                                                                 | Laboratory for Functional Genome Analysis, Dept. Genomics, Gene Center of the LMU Munich                                                                                | Max Muenchhoff, Stefan Krebs, Alexander Graf, Ashok Varadharajan, Oliver Keppler, Helmut Blum                                                                                                                                                                                                                                                                                                                                                                                                                                                                                                                                                                                                                                                                                              |
| EPI_ISL_420940                                                                                 | Wales Specialist Virology Centre                                                                                                                                                                | Public Health Wales Microbiology Cardiff                                                                                                                                | Catherine Moore, Joanne Watkins, Sally Corden, Malorie Perry, Simon Cottrell Sara Rey, Matt Bull, Tom Connor                                                                                                                                                                                                                                                                                                                                                                                                                                                                                                                                                                                                                                                                               |
| EPI_ISL_421473                                                                                 | Instituto Nacional de Saude (INSA)                                                                                                                                                              | Instituto Nacional de Saude (INSA)                                                                                                                                      | Guiomar et al                                                                                                                                                                                                                                                                                                                                                                                                                                                                                                                                                                                                                                                                                                                                                                              |
| EPI_ISL_422427                                                                                 | JABER AL AHMAD AL SABAH HOSPITAL - KUWAIT CITY                                                                                                                                                  | Dasman Diabetes Institute                                                                                                                                               | Fahd Al-Mulla, Rasheeba Iqbal, Sumi John, Ebaa Al-Ozairi, Qais Al-Duwairi                                                                                                                                                                                                                                                                                                                                                                                                                                                                                                                                                                                                                                                                                                                  |
| EPI_ISL_422432                                                                                 | National Public Health Laboratory, National Centre for Infectious Diseases                                                                                                                      | National Public Health Laboratory, National Centre for Infectious Diseases                                                                                              | Mak TM, Octavia S, Cui L, Lin RTP                                                                                                                                                                                                                                                                                                                                                                                                                                                                                                                                                                                                                                                                                                                                                          |
| EPI_ISL_422563                                                                                 | Institute of Microbiology Universidad San Francisco de Quito                                                                                                                                    | Institute of Microbiology Universidad San Francisco de Quito                                                                                                            | Belen Prado-Vivar, Sully Marquez, Juan Jose Guadalupe, Bernardo Gutierrez, Francisco Mora, Juan Gavia, Alejandra Ramones, Franklin Espinoza, Edison Ligna, Jorge Reyes, Patricia Rojas-Silva, Veronica Barragan, Gabriel Trueba, Michelle Grunauer, Paul Cardenas                                                                                                                                                                                                                                                                                                                                                                                                                                                                                                                          |
| EPI_ISL_422588                                                                                 | Dutch COVID-19 response team                                                                                                                                                                    | Erasmus Medical Center                                                                                                                                                  | Bas Oude Munnink, David Nieuwenhuijse, Reina Sikkema, Claudia Schapendonk, Irina Chestakova, Anne van der Linden, Theo Bestebroer, Stefan van Nieuwkoop, Mark Pronk, Pascal Lexmond, Corien Swaan, Manon Haverkate, Madelif Mollers, Mart Stein, Sandra Kengne Kamga Mobou, Jeroen van Kampen, Jolanda Voermans, Aura Timen, Corine GeurtsvanKessel, Annemiek van der Eijk, Richard Molenkamp, Marion Koopmans, on behalf of the Dutch national COVID-19 response team.                                                                                                                                                                                                                                                                                                                    |
| EPI_ISL_424602                                                                                 | The National University Hospital of Iceland                                                                                                                                                     | deCODE genetics                                                                                                                                                         | Daniel F Gudbjartsson; Agnar Helgason; Hakon Jonsson; Olafur T Magnusson; Pall Melsted; Gudmundur L Norddahl; Jona Saemundsdottir; Asgeir Sigurdsson; Patrick Sulem; Arna B Agustsdottir; Berglind Eiriksdothir; Run Fridriksdottir; Elisabet E Gardarsdottir; Gudmundur Georgsson; Olafia S Gretarsdottir; Kjartan R Gudmundsson; Thora R Gunnarsdottir; Arnaldur Gylfason; Hilma Holm; Brynjar O Jensson; Aslaug Jonasdottir; Kamilla S Josefsdottir; Thordur Kristjansson; Droplaug N Magnusdottir; Louise le Roux; Gudrun Sigmundsdottir; Gardar Sveinbjornsson; Kristin E Sveinsdottir; Maney Sveinsdottir; Emil A Thorarensen; Bjarni Thorbjornsson; Gisli Masson; Ingileif Jonsdottir; Alma Moller; Thorolfur Gudnason; Karl G Kristinnson; Unnur Thorsteinsdottir; Kari Stefansson |
| EPI_ISL_425233                                                                                 | Department of Pathology, University of Cambridge                                                                                                                                                | COVID-19 Genomics UK (COG-UK) Consortium                                                                                                                                | Luke W Meredith, M. Estee Torok , Myra Hosmillo, William L. Hamilton, Martin D. Curran, Theresa Feltwell, Anna Yakovleva, Charlotte J. Houldcroft, Aminu S. Jahun, Sarah L. Caddy, Ian Goodfellow                                                                                                                                                                                                                                                                                                                                                                                                                                                                                                                                                                                          |
| EPI_ISL_425565                                                                                 | Queens Medical Centre, Clinical Microbiology Department / DeepSeq Nottingham                                                                                                                    | COVID-19 Genomics UK (COG-UK) Consortium                                                                                                                                | Gemma Clark, Wendy Smith, Manjinder Khakh, Hannah Howson-Wells, Jonathan Ball, Patrick McClure, Joseph Chappell, Theocharis Tsoleridis, Nadine Holmes, Matthew Carlisle, Christopher Moore, Fei Sang, Johnny Debebe, Victoria Wright, Matthew Loose                                                                                                                                                                                                                                                                                                                                                                                                                                                                                                                                        |
| EPI_ISL_425817                                                                                 | West of Scotland Specialist Virology Centre, NHSGGC / MRC-University of Glasgow Centre for Virus Research                                                                                       | COVID-19 Genomics UK (COG-UK) Consortium                                                                                                                                | Ana da Silva Filipe, Kathy Smollett, Stephen Carmichael, Natasha Johnson, Daniel Mair, Lily Tong, Jenna Nichols; Sarah McDonald; Richard Orton, Joseph Hughes, Sreenu Vattipally, David L Robertson; Kathy Li, Natasha Jesudason, Rajiv Shah, James Shepherd, Antonia Ho, Emma Thomson; Alasdair MacLean, Rory Gunson.                                                                                                                                                                                                                                                                                                                                                                                                                                                                     |
| EPI_ISL_425834, EPI_ISL_425986                                                                 | Virology Department, Royal Infirmary of Edinburgh, NHS Lothian / School of Biological Sciences, University of Edinburgh / Institute of Genetics and Molecular Medicine, University of Edinburgh | COVID-19 Genomics UK (COG-UK) Consortium                                                                                                                                | McHugh M, Dewar R, Rooke S, Gallagher M, Balcaza C, O'Toole A, Hill V, McCrone JT, Colquhoun R, Yu X, Jackson B, Scher E, Rambaut A, Williams TC, Templeton K                                                                                                                                                                                                                                                                                                                                                                                                                                                                                                                                                                                                                              |
| EPI_ISL_426286                                                                                 | E. Gulbja Laboratorija                                                                                                                                                                          | Latvian Biomedical Research and Study Centre                                                                                                                            | Ivars Silamielis, Kaspars Megnis, Monta Ustinova, ikitā Zrelavs, Vita Rovte, Mikus Gavars, Dmitrijs Perminovs, Uga Dumpis, Jnis Kloviš                                                                                                                                                                                                                                                                                                                                                                                                                                                                                                                                                                                                                                                     |
| EPI_ISL_426580                                                                                 | Instituto Sabin                                                                                                                                                                                 | Laboratory of Virology                                                                                                                                                  | Fernando L Melo,Gustavo Barra, Ticiane H Santa-Rita, Pedro G Mesquita, Ikaro A Andrade, Tatsuya Nagata, Bergmann M Ribeiro                                                                                                                                                                                                                                                                                                                                                                                                                                                                                                                                                                                                                                                                 |
| EPI_ISL_426581                                                                                 | Motol University Hospital                                                                                                                                                                       | Institute of Applied Biotechnologies a.s.                                                                                                                               | Petr Brož, Jan Geryk, Petr Klempt, Martin Kašný, Adam Novotný, Kateina Kvapilová, Pavel Devínek, Petr Kvapil, Milán Macek                                                                                                                                                                                                                                                                                                                                                                                                                                                                                                                                                                                                                                                                  |
| EPI_ISL_426711, EPI_ISL_426786, EPI_ISL_426849                                                 | Victorian Infectious Diseases Reference Laboratory (VIDRL)                                                                                                                                      | Microbiological Diagnostic Unit Public Health Laboratory and Victorian Infectious Diseases Reference Laboratory, Doherty Institute                                      | Caly L., Seemann T., Sait, M., Schultz M., Druce J., Sherry, N.                                                                                                                                                                                                                                                                                                                                                                                                                                                                                                                                                                                                                                                                                                                            |
| EPI_ISL_428354                                                                                 | LABM GH nord Essonne de Longjumeau - BP 125                                                                                                                                                     | National Reference Center for Viruses of Respiratory Infections, Institut Pasteur, Paris                                                                                | Mélanie Albert, Marion Barbet, Sylvie Behillil, Méline Bizard, Angela Brisebarre, Flora Donati, Etienne Simon-Lorière, Vincent Enouf, Maud Vanpeene, Sylvie van der Werf                                                                                                                                                                                                                                                                                                                                                                                                                                                                                                                                                                                                                   |
| EPI_ISL_428920                                                                                 | State Research Center of Virology and Biotechnology VECTOR, Department of Collection of Microorganisms                                                                                          | State Research Center of Virology and Biotechnology VECTOR, Department of Collection of Microorganisms                                                                  | Sergey A. Bodnev, Oleg V. Pyankov, Tatyana V. Tregubchak, Alexander N. Shvalov, Elena V. Gavrilova, Rinat A. Maksyutov                                                                                                                                                                                                                                                                                                                                                                                                                                                                                                                                                                                                                                                                     |
| EPI_ISL_428946                                                                                 | Laboratoire National de Sante, Microbiology, Virology                                                                                                                                           | Laboratoire National de Sante, Microbiology, Epidemiology and Microbial Genomics                                                                                        | Anke Wienecke-Baldacchino, Ardasha Latsuzbaia, Jessica Tapp, Catherine Ragimbeau, Guillaume Fournier, Tamir Abdelrahman, Trung Nguyen Nguyen, Joel Mossong                                                                                                                                                                                                                                                                                                                                                                                                                                                                                                                                                                                                                                 |
| EPI_ISL_429122                                                                                 | Klinisk mikrobiologi och vardhygien Halmstad                                                                                                                                                    | The Public Health Agency of Sweden                                                                                                                                      | Arne Kotz, Olov Svartstrom, Maria Lind Karlberg, Anna-Malin Linde, Oskar Karlsson Lindsjo, Anna Risberg, Shaman Muradrasoli, Karin Tegmark-Wisell                                                                                                                                                                                                                                                                                                                                                                                                                                                                                                                                                                                                                                          |
| EPI_ISL_429425                                                                                 | Department of Virus and Microbiological Special Diagnostics, Statens Serum Institut, Copenhagen, Denmark, Artillerivej 5, 2300 Copenhagen S                                                     | Albertsen lab, Department of Chemistry and Bioscience, Aalborg University, Denmark                                                                                      | Rasmus Kirkegaard                                                                                                                                                                                                                                                                                                                                                                                                                                                                                                                                                                                                                                                                                                                                                                          |
| EPI_ISL_429671, EPI_ISL_429677, EPI_ISL_429683, EPI_ISL_429688, EPI_ISL_429689, EPI_ISL_429691 | Central Public Health Laboratory/Octávio Magalhães Institute (IOM) from the Ezequiel Dias Foundation (FUNED)                                                                                    | Instituto Octávio Magalhães / Fundação Ezequiel Dias (IOM/Funed)                                                                                                        | Talita Adelino, Joilson Xavier, Marta Giovanetti, Vagner Fonseca, Marcos Vinicius Silva, Luiz Carlos Junior Alcantara, Marluce Aparecida Assunção Oliveira                                                                                                                                                                                                                                                                                                                                                                                                                                                                                                                                                                                                                                 |
| EPI_ISL_430102                                                                                 | WHO National Influenza Centre Russian Federation                                                                                                                                                | WHO National Influenza Centre Russian Federation                                                                                                                        | Andrey Komissarov, Artem Fadeev, Mariia Sergeeva, Anna Ivanova, Daria Danilenko                                                                                                                                                                                                                                                                                                                                                                                                                                                                                                                                                                                                                                                                                                            |
| EPI_ISL_430609, EPI_ISL_430698                                                                 | Victorian Infectious Diseases Reference Laboratory (VIDRL)                                                                                                                                      | Microbiological Diagnostic Unit Public Health Laboratory and Victorian Infectious Diseases Reference Laboratory, The Peter Doherty Institute for Infection and Immunity | Caly L., Seemann T., Sait, M., Schultz M., Druce J., Sherry, N.                                                                                                                                                                                                                                                                                                                                                                                                                                                                                                                                                                                                                                                                                                                            |
| EPI_ISL_430797, EPI_ISL_430805                                                                 | Departamento de Biología y genética molecular, IACA Laboratorios.                                                                                                                               | Área de Secuenciación del Laboratorio de Virología del Hospital de Niños Dr. Ricardo Gutierrez                                                                          | Nabaes Jodar, MS; Goya, S; Natale, MI; Lusso, S; Tittarelli, E; Suárez, A; Masciovecchio MV; Streitenberger ER; Mistchenko, AS; Valinotto, LE; Viegas, M.                                                                                                                                                                                                                                                                                                                                                                                                                                                                                                                                                                                                                                  |
| EPI_ISL_430816                                                                                 | Laboratorio de Virología del Hospital de Niños Dr.                                                                                                                                              | Área de Secuenciación del Laboratorio de Virología del                                                                                                                  | Nabaes Jodar, MS; Goya, S; Natale, MI; Lusso, S; Gravis, E; Mistchenko, AS; Valinotto, LE; Viegas, M.                                                                                                                                                                                                                                                                                                                                                                                                                                                                                                                                                                                                                                                                                      |

|                                                |                                                                                                                                                                                                          |                                                                                                                             |                                                                                                                                                                                                                                                                                                                                                                                                                                                                                                                                                                                                                                                                                               |
|------------------------------------------------|----------------------------------------------------------------------------------------------------------------------------------------------------------------------------------------------------------|-----------------------------------------------------------------------------------------------------------------------------|-----------------------------------------------------------------------------------------------------------------------------------------------------------------------------------------------------------------------------------------------------------------------------------------------------------------------------------------------------------------------------------------------------------------------------------------------------------------------------------------------------------------------------------------------------------------------------------------------------------------------------------------------------------------------------------------------|
| EPI_ISL_432449                                 | Ricardo Gutierrez<br>Wales Specialist Virology Centre                                                                                                                                                    | Hospital de Niños Dr. Ricardo Gutierrez<br>Public Health Wales Microbiology Cardiff                                         | Catherine Moore, Johnathan Evans, Malorie Perry, Simon Cottrell, Alec Birchley, Alexander Adams, Amy Gaskin, Bree Gatica-Wilcox, Jason Coombes, Lauren Gilbert, Lee Graham, Nicole Pacchiarini, Sara Kumziene-Summerhayes, Sarah Taylor, Sophie Jones, Sara Rey, Matthew Bull, Joanne Watkins, Sally Corden, Tom Connor                                                                                                                                                                                                                                                                                                                                                                       |
| EPI_ISL_433414                                 | Virology Department, Royal Infirmary of Edinburgh,<br>NHS Lothian / School of Biological Sciences, University<br>of Edinburgh / Institute of Genetics and Molecular<br>Medicine, University of Edinburgh | COVID-19 Genomics UK (COG-UK) Consortium                                                                                    | McHugh M, Dewar R, Rooke S, Gallagher M, Balcaza C, O'Toole A, Hill V, McCrone JT, Colquhoun R, Yu X, Jackson B, Rambaut A, Williams TC, Templeton K                                                                                                                                                                                                                                                                                                                                                                                                                                                                                                                                          |
| EPI_ISL_434133                                 | Washington State Department of Health                                                                                                                                                                    | Seattle Flu Study                                                                                                           | Chu et al                                                                                                                                                                                                                                                                                                                                                                                                                                                                                                                                                                                                                                                                                     |
| EPI_ISL_434347                                 | Lab voor klinische biologie                                                                                                                                                                              | Onderzoeksgroep Virologie                                                                                                   | Laurens Lambrechts, Nick Vereecke, Marthe Pauwels, Jozefien De Clercq, Bruno Verhasselt, Linos Vandekerckhove, Hans Nauwynck, Sebastiaan Theuns                                                                                                                                                                                                                                                                                                                                                                                                                                                                                                                                               |
| EPI_ISL_434457                                 | Laboratory of Microbiology, Medical School, National<br>and Kapodistrian University of Athens                                                                                                            | Laboratory of Biology, Department of Medicine,<br>Democritus University of Thrace                                           | Kassela K., Bampali,M., Dovrolis,N., Gatzidou,E., Froukai,E., Stavropoulou,A., Veletzka,S., Tsakris,A., Spanakis,N. and Karakasiliotis,I.                                                                                                                                                                                                                                                                                                                                                                                                                                                                                                                                                     |
| EPI_ISL_434676                                 | Surbrunns VC                                                                                                                                                                                             | The Public Health Agency of Sweden                                                                                          | Erik Embring, Oskar Karlsson Lindsjo, Maria Lind Karlberg, Anna-Malin Linde, Olov Svartstrom, Anna Risberg, Theresa Enkirch, Mia Brytting, Karin Tegmark-Wisell                                                                                                                                                                                                                                                                                                                                                                                                                                                                                                                               |
| EPI_ISL_434697                                 | unknown                                                                                                                                                                                                  | National Institute of Health, Department of medical<br>Sciences, Ministry of Public Health, Thailand                        | Pilaiuk,Okada; Siripaporn,Phuygun; Thanutsapa,Thanadachakul; Sittiporn,Parmmen;Warawan,Wongboot; Sunthareeya,Waicharoen; Malinee,Chittaganpich                                                                                                                                                                                                                                                                                                                                                                                                                                                                                                                                                |
| EPI_ISL_434725, EPI_ISL_434729                 | Houston Methodist Hospital                                                                                                                                                                               | Houston Methodist Hospital                                                                                                  | S. Wesley Long, Randall J. Olsen, Paul A. Christensen, David W. Bernard, James J. Davis, Maulik Shukla, Marcus Nguyen, Matthew Ojeda Saavedra, Concepcion C. Cantu, Prasanti Yerramilli, Layne Pruitt, Sishir Subedi, Heather Hendrickson, Ghazaleh Eskandari, Muthiah Kumaraswami, Jason S. McLellan, Hakon Jonsson, Kari Stefansson, and James M. Musser                                                                                                                                                                                                                                                                                                                                    |
| EPI_ISL_435143                                 | Mohammed Bin Rashid University of Medicine and<br>Health Sciences                                                                                                                                        | Al Jailla Genomics Center                                                                                                   | Ahmad Abou Tayoun, Tom Loney, Hamda Khansaheb, Sathishkumar Ramaswamy, Divinlal Harilal, Zulfa Omar Deesi, Rupa Murthy Varghese, Hanan Al Suwaidi, Abdulmajeed Alkhaja, Mohammed Uddin, Rifat Hamoudi, Rabih Halwani, Abiola Catherine Senok, Qutayba Hamid, Norbert Nowotny, Alawi Alsheikh-Ali                                                                                                                                                                                                                                                                                                                                                                                              |
| EPI_ISL_435144                                 | Hospital Universitario La Paz                                                                                                                                                                            | Hospital Universitario 12 de Octubre                                                                                        | Elias Dahdouh, Sara González, Raúl Recio, Fernando Lázaro, Esther Viedma, Natalia Stella, Julio García, Juan Carlos Galán, Rafael Cantón, M <sup>a</sup> Dolores Folgueira, Rafael Delgado, Jesús Mingorance                                                                                                                                                                                                                                                                                                                                                                                                                                                                                  |
| EPI_ISL_435148, EPI_ISL_435150                 | Ospedale SS Annunziata                                                                                                                                                                                   | Istituto Zooprofilattico Sperimentale dell'Abruzzo e<br>Molise "G.Caporale"                                                 | Lorusso A, Marcacci M, Di Domenico M, Ancora M, Curini V, Mangone I, Rinaldi A, Di Pasquale A, Cammà C, Puglia I, Savini G                                                                                                                                                                                                                                                                                                                                                                                                                                                                                                                                                                    |
| EPI_ISL_435152                                 | Servizio di Igiene, Epidemiologia e Sanità Pubblica<br>(SIESP) Avezzano                                                                                                                                  | Istituto Zooprofilattico Sperimentale dell'Abruzzo e<br>Molise "G.Caporale"                                                 | Lorusso A, Marcacci M, Di Domenico M, Ancora M, Curini V, Mangone I, Rinaldi A, Di Pasquale A, Cammà C, Puglia I, Savini G                                                                                                                                                                                                                                                                                                                                                                                                                                                                                                                                                                    |
| EPI_ISL_435409, EPI_ISL_435426, EPI_ISL_435430 | Virological Research Group, Szentágotthai Research<br>Centre                                                                                                                                             | Bioinformatics Research Group, Szentágotthai<br>Research Centre                                                             | Péter Urbán, Endre Gábor Tóth, Gábor Kemenesi, Róbert Herczeg, Attila Gyenesei, Ferenc Jakab                                                                                                                                                                                                                                                                                                                                                                                                                                                                                                                                                                                                  |
| EPI_ISL_435543                                 | NYU Langone Health                                                                                                                                                                                       | Departments of Pathology and Medicine, New York<br>University School of Medicine                                            | Maria Aguero-Rosenfeld, Brendan Belovarac, Margaret Black, Ludovic Boytard, John Cadley, Paolo Cotzia, John Chen, Dacia Dimartino, Xiaojun Feng, Tatyana Gindin, Emily Guzman, Adriana Heguy, Megan Hogan, Emily Huang, George Jour, Lawrence H. Lin, Raven Luther, Andrew Lytle, Christian Marier, Matthew T. Maurano, Mark J. Mulligan, Peter Meyn, Raquel Ordonez Ciriza, Iman Osman, Jared Pinnell, Vanessa Raabe, Sitharam Ramaswami, Amy Rapkiewicz, Andre M. Ribeiro-dos-Santos, Marie Samanovic-Golden, Antonio Serrano, Guomiao Shen, Matija Snuderl, Theodore Vougiouklakis, Nick Vulpescu, Gael Westby, Paul Zappile, Yutong Zhang                                                 |
| EPI_ISL_435723                                 | Laboratory of Genomics & Bioinformatics, Institute of<br>Immunology and Experimental Therapy, Polish<br>Academy of Sciences Oddzia Mikrobiologii<br>Wojewódzkiej Stacji Sanitarno Epidemiologiczna       | Laboratory of Genomics & Bioinformatics, Institute of<br>Immunology and Experimental Therapy, Polish<br>Academy of Sciences | Aleksandra Herud, Dorota Kujawa, Dariusz Martynowski, Krzysztof Jakub Pawlik, Joanna Sikorska, Paulina ebrowska, Grayna Zalewska, Oskar Karpiski and ukasz aczmanski                                                                                                                                                                                                                                                                                                                                                                                                                                                                                                                          |
| EPI_ISL_436238                                 | Servicio de Microbiología. Hospital Universitario Doctor<br>Peset                                                                                                                                        | Sequencing and Bioinformatics Service and Molecular<br>Epidemiology Research Group. FISABIO-Public Health                   | Juan Alberola Enguidanos, Juan Jose Camarena Miñana, Rosa González Pellicer, Neris Garcia-Gonzalez, Inma Galán Vendrell, Sandra Carbo, Loreto Ferrús Abad, Paula Ruiz-Hueso, Mariana Reyes-Prieto, Vicente Soriano Chirona, Ivan Ansari, Maria Alma Bracho, Griselda De Marco, Beatriz Beamud, Lidia Ruiz Roldan, Marta Pla Diaz, Lúcia Martínez-Priego, Giuseppe D'Auria, Jose Miguel Nogueira Coito, Fernando Gonzalez-Candelas                                                                                                                                                                                                                                                             |
| EPI_ISL_436724                                 | Ospedale Civile S. Liberatore di Atri                                                                                                                                                                    | Istituto Zooprofilattico Sperimentale dell'Abruzzo e<br>Molise "G.Caporale"                                                 | Lorusso A, Marcacci M, Di Domenico M, Ancora M, Curini V, Mangone I, Rinaldi A, Di Pasquale A, Cammà C, Puglia I, Savini G                                                                                                                                                                                                                                                                                                                                                                                                                                                                                                                                                                    |
| EPI_ISL_437997                                 | Center for Virology, Medical University of Vienna                                                                                                                                                        | Bergthaler laboratory, CeMM Research Center for<br>Molecular Medicine of the Austrian Academy of<br>Sciences                | Alexandra Popa, Benedikt Agerer, Henrique Colaco, Lukas Endler, Jakob-Wendelin Genger, Alexander Lercher, Mark Smyth, Thomas Penz, Michael Schuster, Jan Laine, Martin Senekowitsch, Judith Aberle, Stephan Aberle, Elisabeth Puchhammer-Stoeckl, Manfred Nairz, Guenter Weiss, Wegene Borena, Dorothee von Laer, Christoph Bock, Andreas Bergthaler                                                                                                                                                                                                                                                                                                                                          |
| EPI_ISL_438341                                 | Department of Pathology, University of Cambridge                                                                                                                                                         | Wellcome Sanger Institute for the COVID-19 Genomics<br>UK (COG-UK) consortium                                               | Luke W Meredith, M. Estée Török , Myra Hosmillo, William L. Hamilton, Martin D. Curran, Theresa Feltwell, Grant Hall, Anna Yakovleva, Fahad A Khokhar, Charlotte J. Houldcroft, Laura G Caller, Aminu S. Jahun, Sarah L. Caddy, Ian Goodfellow, Alex Alderton, Roberto Amato, Sonia Goncalves, Ewan Harrison, David K. Jackson, Ian Johnston, Dominic Kwiatkowski, Cordelia Langford, John Sillitoe on behalf of the Wellcome Sanger Institute COVID-19 Surveillance Team ( <a href="http://www.sanger.ac.uk/covid-team">http://www.sanger.ac.uk/covid-team</a> )                                                                                                                             |
| EPI_ISL_438968                                 | Keio University School of Medicine                                                                                                                                                                       | Keio University School of Medicine                                                                                          | Kenjiro Kosaki                                                                                                                                                                                                                                                                                                                                                                                                                                                                                                                                                                                                                                                                                |
| EPI_ISL_439056                                 | West of Scotland Specialist Virology Centre, NHSGGC /<br>MRC-University of Glasgow Centre for Virus Research                                                                                             | COVID-19 Genomics UK (COG-UK) Consortium                                                                                    | Ana da Silva Filipe, Natasha Johnson, Kathy Smollett, Daniel Mair, Stephen Carmichael, Lily Tong, Jenna Nichols, Eithu Aranday-Cortes, Kirstyn Brunker, Yasmin Parr, Kyriaki Nomikou; Sarah McDonald, Marc Niebel, Patawee Asamaphan; Richard Orton, Joseph Hughes, Sreenu Vattipally, David L Robertson; Ailsa MacLean, Rory Gunson; Kathy Li, Natasha Jesudason, Rajiv Shah, James Shepherd, Antonia Ho, Emma Thomson                                                                                                                                                                                                                                                                       |
| EPI_ISL_439550                                 | Department of Pathology, University of Cambridge                                                                                                                                                         | Wellcome Sanger Institute for the COVID-19 Genomics<br>UK (COG-UK) consortium                                               | Luke W Meredith, M. Estée Török , Myra Hosmillo, William L. Hamilton, Martin D. Curran, Theresa Feltwell, Grant Hall, Anna Yakovleva, Fahad A Khokhar, Charlotte J. Houldcroft, Laura G Caller, Aminu S. Jahun, Sarah L. Caddy, Ian Goodfellow, Alex Alderton, Roberto Amato, Sonia Goncalves, Ewan Harrison, David K. Jackson, Ian Johnston, Dominic Kwiatkowski, Cordelia Langford, John Sillitoe on behalf of the Wellcome Sanger Institute COVID-19 Surveillance Team ( <a href="http://www.sanger.ac.uk/covid-team">http://www.sanger.ac.uk/covid-team</a> )                                                                                                                             |
| EPI_ISL_439686, EPI_ISL_439710                 | Liverpool Clinical Laboratories                                                                                                                                                                          | COVID-19 Genomics UK (COG-UK) Consortium                                                                                    | Sam Haldenby, Anita Lucaci, Steve Paterson, Julian Hiscox, Alistair Darby, M Almsaud, A Alrezaihi, Muhannad Alruwaili, Stuart D Armstrong, Jones Benjamin , Eleanor G Bentley, Anu Chawla, Jordan J Clark, Angela Cowell, Richard Eccles, Isabel Garca-Dorival, Matthew Gemmill, Alessandro Gerada, PKF Gilmore, Richard Gregory, Ximeng Han, Catherine Hartley, Margaret Hughes, Miren Iturriza-Gomara, James Johnson, L Luu, Jenifer Manson , Charlotte Nelson, Elaine O'ÁoToole, Cassie Olateju, Rebekah Penrice-Randal-†, Lucille Rainbow, N.P Randle, Trevor Ian Robinson, Parul Sharma, Ghada T Shawli, James P Stewart , Neil Swainston, Ecaterina Vamos, Joanne Watts, Mark Whitehead |
| EPI_ISL_441122                                 | Department of Pathology, University of Cambridge                                                                                                                                                         | Wellcome Sanger Institute for the COVID-19 Genomics<br>UK (COG-UK) consortium                                               | Luke W Meredith, M. Estée Török , Myra Hosmillo, William L. Hamilton, Martin D. Curran, Theresa Feltwell, Grant Hall, Anna Yakovleva, Fahad A Khokhar, Charlotte J. Houldcroft, Laura G Caller, Aminu S. Jahun, Sarah L. Caddy, Ian Goodfellow, Alex Alderton, Roberto Amato, Sonia Goncalves, Ewan Harrison, David K. Jackson, Ian Johnston, Dominic Kwiatkowski, Cordelia Langford, John Sillitoe on behalf of the Wellcome Sanger Institute COVID-19 Surveillance Team ( <a href="http://www.sanger.ac.uk/covid-team">http://www.sanger.ac.uk/covid-team</a> )                                                                                                                             |
| EPI_ISL_441405, EPI_ISL_441436                 | Regional Virus Laboratory, Belfast Health and Social<br>Care Trust                                                                                                                                       | COVID-19 Genomics UK (COG-UK) Consortium                                                                                    | Conall McCaughey, James McKenna, Tanya Curran, Susan Feeney, Alison Watt, Ciara Cox, Mairead Connor, Zoltan Molnar, David Simpson, Derek Fairley                                                                                                                                                                                                                                                                                                                                                                                                                                                                                                                                              |
| EPI_ISL_441828                                 | Department of Pathology, University of Cambridge                                                                                                                                                         | Wellcome Sanger Institute for the COVID-19 Genomics<br>UK (COG-UK) consortium                                               | Luke W Meredith, M. Estée Török , Myra Hosmillo, William L. Hamilton, Martin D. Curran, Theresa Feltwell, Grant Hall, Anna Yakovleva, Fahad A Khokhar, Charlotte J. Houldcroft, Laura G Caller, Aminu S. Jahun, Sarah L. Caddy, Ian Goodfellow, Alex Alderton, Roberto Amato, Sonia Goncalves, Ewan Harrison, David K. Jackson, Ian Johnston, Dominic Kwiatkowski, Cordelia Langford, John Sillitoe on behalf of the Wellcome Sanger Institute COVID-19 Surveillance Team ( <a href="http://www.sanger.ac.uk/covid-team">http://www.sanger.ac.uk/covid-team</a> )                                                                                                                             |



|                                                                |                                                                                                                                                                                                                                 |                                                                                                                                                                           |                                                                                                                                                                                                                                                                                                                                                                                                                                                                                                                                                                                                                                                                           |
|----------------------------------------------------------------|---------------------------------------------------------------------------------------------------------------------------------------------------------------------------------------------------------------------------------|---------------------------------------------------------------------------------------------------------------------------------------------------------------------------|---------------------------------------------------------------------------------------------------------------------------------------------------------------------------------------------------------------------------------------------------------------------------------------------------------------------------------------------------------------------------------------------------------------------------------------------------------------------------------------------------------------------------------------------------------------------------------------------------------------------------------------------------------------------------|
| EPI_ISL_443229                                                 | National Public Health Laboratory, National Centre for Infectious Diseases                                                                                                                                                      | National Public Health Laboratory, National Centre for Infectious Diseases                                                                                                | Mak Tze Minn, Octavia Sophie, Chavatte Jean-Marc, Cui Lin, Lin Raymond Tzer Pin                                                                                                                                                                                                                                                                                                                                                                                                                                                                                                                                                                                           |
| EPI_ISL_443280                                                 | CHU - Hôpital Cavale Blanche - Labo. de Virologie                                                                                                                                                                               | National Reference Center for Viruses of Respiratory Infections, Institut Pasteur, Paris                                                                                  | Mélanie Albert, Marion Barbet, Sylvie Behillil, Méline Bizard, Angela Brisebarre, Flora Donati, Etienne Simon-Lorière, Vincent Enouf, Maud Vanpeene, Sylvie van der Werf, Léa Pilorge                                                                                                                                                                                                                                                                                                                                                                                                                                                                                     |
| EPI_ISL_443938                                                 | PHE South West Regional Laboratory, National Infection Service                                                                                                                                                                  | Wellcome Sanger Institute for the COVID-19 Genomics UK (COG-UK) consortium                                                                                                | Stephanie Hutchings, Hannah Pymont, Dr Peter Muir, Barry Vipond, Rich Hopes; and Alex Alderton, Roberto Amato, Sonia Goncalves, Ewan Harrison, David K. Jackson, Ian Johnston, Dominic Kwiatkowski, Cordelia Langford, John Sillitoe on behalf of the Wellcome Sanger Institute COVID-19 Surveillance Team ( <a href="http://www.sanger.ac.uk/covid-team">http://www.sanger.ac.uk/covid-team</a> )                                                                                                                                                                                                                                                                        |
| EPI_ISL_445331                                                 | HOSPITAL HERMINDA MARTIN CHILLAN                                                                                                                                                                                                | Instituto de Salud Publica de Chile                                                                                                                                       | Andrés E Castillo, Bárbara Parra,Paz Tapia, Jaime Lagos, Loredana Arata, Alejandra Acevedo, Winston Andrade, Gabriel Leal, Carolina Tambley, Patricia Bustos, Rodrigo Fasce, Jorge Fernandez                                                                                                                                                                                                                                                                                                                                                                                                                                                                              |
| EPI_ISL_445361                                                 | CLINICA UC SAN CARLOS DE APOQUINDO                                                                                                                                                                                              | Instituto de Salud Publica de Chile                                                                                                                                       | Andrés E Castillo, Bárbara Parra,Paz Tapia, Jaime Lagos, Loredana Arata, Alejandra Acevedo, Winston Andrade, Gabriel Leal, Carolina Tambley, Patricia Bustos, Rodrigo Fasce, Jorge Fernandez                                                                                                                                                                                                                                                                                                                                                                                                                                                                              |
| EPI_ISL_445378                                                 | HOSPITAL DE BULNES                                                                                                                                                                                                              | Instituto de Salud Publica de Chile                                                                                                                                       | Andrés E Castillo, Bárbara Parra,Paz Tapia, Jaime Lagos, Loredana Arata, Alejandra Acevedo, Winston Andrade, Gabriel Leal, Carolina Tambley, Patricia Bustos, Rodrigo Fasce, Jorge Fernandez                                                                                                                                                                                                                                                                                                                                                                                                                                                                              |
| EPI_ISL_445851, EPI_ISL_446676                                 | Wales Specialist Virology Centre                                                                                                                                                                                                | Public Health Wales Microbiology Cardiff                                                                                                                                  | Catherine Moore, Johnathan Evans, Laura Gifford, Malorie Perry, Simon Cottrell, Alec Birchley, Alexander Adams, Amy Gaskin, Bree Gatica-Wilcox, Jason Coombes, Lauren Gilbert, Lee Graham, Nicole Pacchiarini, Sara Kumziene-Summerhayes, Sarah Taylor, Sophie Jones, Sara Rey, Matthew Bull, Joanne Watkins, Sally Corden, Tom Connor                                                                                                                                                                                                                                                                                                                                    |
| EPI_ISL_447162                                                 | Department of Clinical Microbiology                                                                                                                                                                                             | GIGA Medical Genomics                                                                                                                                                     | Keith Durkin, María Artesi, Sébastien Bontems, Raphaël Boreux, Cécile Meex, Pierrette Melin, Marie-Pierre Hayette, Vincent Bours.                                                                                                                                                                                                                                                                                                                                                                                                                                                                                                                                         |
| EPI_ISL_447323                                                 | Clinical Virology Laboratory, Soroka Medical Center and the Faculty of Health Sciences, Ben-Gurion University of the Negev                                                                                                      | Stern Lab                                                                                                                                                                 | Stern Lab                                                                                                                                                                                                                                                                                                                                                                                                                                                                                                                                                                                                                                                                 |
| EPI_ISL_447610                                                 | Goethe University Hospital Frankfurt                                                                                                                                                                                            | Institute for Medical Virology, Goethe University Hospital Frankfurt                                                                                                      | Tuna Toptan, Sebastian Hoehl, Sandra Westhaus, Denisa Bojkova, Annemarie Berger, Björn Rotter, Klaus Hoffmeier, Jindrich Cinatl, Sandra Ciesek, and Marek Widera                                                                                                                                                                                                                                                                                                                                                                                                                                                                                                          |
| EPI_ISL_447617                                                 | Department of Laboratory Medicine, National Taiwan University Hospital                                                                                                                                                          | Microbial Genomics Core Lab, National Taiwan University Centers of Genomic and Precision Medicine                                                                         | Shiou-Hwei Yeh, You-Yu Lin, Ya-Yun Lai, Chiao-Ling Li, Shan-Chwen Chang, Pei-Jer Chen, Sui-Yuan Chang                                                                                                                                                                                                                                                                                                                                                                                                                                                                                                                                                                     |
| EPI_ISL_447636                                                 | unknown                                                                                                                                                                                                                         | Department of Medicine                                                                                                                                                    | Kassela,K., Dovrolis,N., Bampali,M., Gatzidou,E., Froukala,E., Stavropoulou,A., Veletza,S., Tsakris,A., Spanakis,N. and Karakasiotis,I.                                                                                                                                                                                                                                                                                                                                                                                                                                                                                                                                   |
| EPI_ISL_448762                                                 | Oxford Viroemics, NDM, University of Oxford; Oxford University Hospitals; Basingstoke and North Hampshire Hospital                                                                                                              | COVID-19 Genomics UK (COG-UK) Consortium                                                                                                                                  | Tanya Golubchik, David Bonsall, George Macintyre, Amy Trebes, Mariateresa de Cesare, Catrin Moore, Alex Mobbs, Anita Justice, Robert Shaw, Monique Andersson, Emma Wise, Nathan Moore, Jessica Lynch, Nick Cortes, Stephen Kidd, David Buck, John Todd, Christophe Fraser                                                                                                                                                                                                                                                                                                                                                                                                 |
| EPI_ISL_449037                                                 | Quadram Institute Bioscience                                                                                                                                                                                                    | COVID-19 Genomics UK (COG-UK) Consortium                                                                                                                                  | Dave J. Baker, Gemma L. Kay, Alp Aydin, Thanh Le-Viet, Steven Rudder, Ana P. Tedim, Anastasia Kolyva, Maria Diaz, Leonardo de Oliveira Martins, Nabil-Fareed Alikhan, Lizzie Meadows, Rachael Stanley, Ngozi Elumogo, Muhammed Yasir, Nicholas M. Thomson, Alexander J Trotter, Rachel Gilroy, Samuel Bloomfield, Claire Stuart, Andrew Bell, Reenesh Prakash, Samir Dervisevic, Alison E. Mather, John Wain, Mark Webber, Andrew J. Page, Justin O'Grady                                                                                                                                                                                                                 |
| EPI_ISL_450150                                                 | MSHS Clinical Microbiology Laboratories                                                                                                                                                                                         | MSHS Pathogen Surveillance Program                                                                                                                                        | Ana S. Gonzalez-Reiche, Mitchell Sullivan, Ajay Obla, Gopi Patel, Emilia Sordillo, Melissa Gitman, Alberto Paniz-mondolfi, Matthew Hernandez, Shelcie Fabre, Jose Polanco, Zenab Khan, Bremy Albuquerque, Jayeeta Dutta, Juan Soto, Shwetha Sridhar Hara, Ying-Chih Wang, Melissa Smith, Robert Sebra, Lisa Miorin, Wen-chun Liu, Randy Albrecht, Judith Aberg, Florian Krammer, Adolfo Garcia-Sastre, Viviana Simon, Harm van Bakel                                                                                                                                                                                                                                      |
| EPI_ISL_450197                                                 | National Institute of Health. Department of medical Sciences, Ministry of Public Health, Thailand                                                                                                                               | National Institute of Health. Department of medical Sciences, Ministry of Public Health, Thailand                                                                         | Pilailuk,Okada; Siripaporn,Phuygun; Thanutsapa,Thananachakul; Sittiporn,Parmmen;Warawan,Wongboot; Sunthareeya,Waicharoen; Malinee,Chittaganpitch                                                                                                                                                                                                                                                                                                                                                                                                                                                                                                                          |
| EPI_ISL_450241                                                 | WHO National Influenza Centre Russian Federation                                                                                                                                                                                | WHO National Influenza Centre Russian Federation                                                                                                                          | Andrey Komissarov, Artem Fadeev, Mariia Sergeeva, Anna Ivanova, Tamila Musaeva, Ksenia Komissarova, Mariia Timofeeva, Veronica Eder, Mariia Pisareva, Daria Danilenko                                                                                                                                                                                                                                                                                                                                                                                                                                                                                                     |
| EPI_ISL_451786                                                 | Viollier AG                                                                                                                                                                                                                     | Department of Biosystems Science and Engineering, ETH Zürich                                                                                                              | Christian Beisel, Sarah Nadeau, Ivan Topolsky, Pedro Ferreira, Philipp Jablonski, Susana Posada-Céspedes, Tobias Schär, Ina Nissen, Natascha Santacroce, Elodie Burcklen, Christiane Beckmann, Maurice Redondo, Olivier Kobel, Christoph Noppen, Sophie Seidel, Noemie Santamaria de Souza, Niko Beerewinkel, Tanja Stadler                                                                                                                                                                                                                                                                                                                                               |
| EPI_ISL_452671                                                 | Servicio de Microbiología. Hospital Universitario Donostia. OSI Donostialdea. Área de Enfermedades Infecciosas, Grupo de Infección Respiratoria y Resistencia Antimicrobiana. Instituto de Investigación Sanitaria Biodonostia. | SeqCOVID-SPAIN consortium/IBV(CSIC)                                                                                                                                       | Gustavo Cilla, Milagrosa Montes, Luis Piñeiro, Jose Maria Marimón and SeqCOVID-SPAIN consortium                                                                                                                                                                                                                                                                                                                                                                                                                                                                                                                                                                           |
| EPI_ISL_453724                                                 | Virology Department, Sheffield Teaching Hospitals NHS Foundation Trust/Department of Infection, Immunity and Cardiovascular Disease, The Medical School, University of Sheffield                                                | COVID-19 Genomics UK (COG-UK) Consortium                                                                                                                                  | Thushan de Silva, Matthew Parker, Nikki Smith, Adri Angyal, Rebecca Brown, Luke Green, Rachel Tucker, Paul Parsons, Danielle Groves, Katie Johnson, Laura Carrilero, Alex Keeley, Dave Partridge, Matthew Wyles, Benjamin Lindsey, Mehmet Yavuz, Mohammad Raza, Cariad Evans                                                                                                                                                                                                                                                                                                                                                                                              |
| EPI_ISL_453864, EPI_ISL_453874, EPI_ISL_454151, EPI_ISL_454334 | unknown                                                                                                                                                                                                                         | Instituto Nacional de Saude (INSA)                                                                                                                                        | Borges et al                                                                                                                                                                                                                                                                                                                                                                                                                                                                                                                                                                                                                                                              |
| EPI_ISL_454460                                                 | Karolinska Universitetslaboratoriet                                                                                                                                                                                             | The Public Health Agency of Sweden                                                                                                                                        | Anna-Malin Linde, Maria Lind Karlberg, Mattias Haukland, Reza Advani, Olov Svartstrom, Oskar Karlsson Lindsjo, Petra Edquist, Shamam Muradrasoli, Anna Risberg, Karin Tegmark-Wisell                                                                                                                                                                                                                                                                                                                                                                                                                                                                                      |
| EPI_ISL_455111                                                 | Olof Norrby                                                                                                                                                                                                                     | The Public Health Agency of Sweden                                                                                                                                        | Bla Kustens halsocentral, Anna-Malin Linde, Maria Lind Karlberg, Oskar Karlsson Lindsjo, Olov Svartstrom, Anna Risberg, Theresa Enkirch, Mia Brytting, Karin Tegmark-Wisell                                                                                                                                                                                                                                                                                                                                                                                                                                                                                               |
| EPI_ISL_455162                                                 | Dutch COVID-19 response team                                                                                                                                                                                                    | Erasmus Medical Center                                                                                                                                                    | Bas Oude Munnink, David Nieuwenhuijse, Reina Sikkema, Claudia Schapendonk, Irina Chestakova, Anne van der Linden, Theo Bestebroer, Stefan van Nieuwkoop, Mark Pronk, Pascal Lexmond, Corien Swaan, Manon Haverkate, Madelief Mollers, Mart Stein, Sandra Kengne Kanga Mobou, Jeroen van Kampen, Jolanda Voermans, Aura Timen, Corine GeurtsvanKessel, Annetiek van der Eijk, Richard Molenkamp, Marion Koopmans, on behalf of the Dutch national COVID-19 response team.                                                                                                                                                                                                  |
| EPI_ISL_455705                                                 | National Hospital of Tropical Diseases                                                                                                                                                                                          | Oxford University Clinical Research Unit, Hanoi, Vietnam                                                                                                                  | Nguyen Thi Tam, Van Dinh Trang, Nguyen Thu Trang, Nguyen Thi Ngoc Diep, Le Nguyen Minh Hoa, Pham Ngoc Thach, H. Rogier van Doorn, on behalf of the OUCRU COVID-19 research group                                                                                                                                                                                                                                                                                                                                                                                                                                                                                          |
| EPI_ISL_455713                                                 | National Hospital of Tropical Diseases                                                                                                                                                                                          | Oxford University Clinical Research Unit, Hanoi, Vietnam                                                                                                                  | Nguyen Thi Tam, Van Dinh Trang, Nguyen Thi Hong Thuong, Vu Thi Ngoc Bich, Nguyen Thu Trang, Nguyen Thi Ngoc Diep, Le Nguyen Minh Hoa, Pham Ngoc Thach, H. Rogier van Doorn, on behalf of the OUCRU COVID-19 research group                                                                                                                                                                                                                                                                                                                                                                                                                                                |
| EPI_ISL_456114                                                 | NYU Langone Health                                                                                                                                                                                                              | Departments of Pathology and Medicine, New York University School of Medicine                                                                                             | Maria Aguero-Rosenfeld, Brendan Belovarac, Margaret Black, Ludovic Boytard, John Cadley, Paolo Cotzia, John Chen, Dacia Dimartino, Xiaojun Feng, Tatyana Gindin, Emily Guzman, Adriana Heguy, Megan Hogan, Emily Huang, George Jour, Alireza Khodadadi-Jamayran, Lawrence H. Lin, Raven Luther, Andrew Lytle, Christian Marier, Matthew T. Maurano, Mark J. Mulligan, Peter Meyn, Raquel Ordóñez Ciriza, Iman Osman, Jared Pinnell, Vanessa Raabe, Sitharam Ramaswami, Amy Rapkiewicz, Andre M. Ribeiro-dos-Santos, Marie Samanovic-Golden, Antonio Serrano, Guomiao Shen, Matija Snuderl, Theodore Vougiouklakis, Nick Vulpescu, Gael Westby, Paul Zappile, Yutong Zhang |
| EPI_ISL_456156                                                 | Instituto Nacional de Salud - Unidad de Secuenciación y Análisis Genómico                                                                                                                                                       | Instituto Nacional de Salud, Universidad Cooperativa de Colombia, Instituto Alexander von Humboldt, Imperial College-London, London School of Hygiene & Tropical Medicine | Katherine Laiton-Donato, Diego A. Álvarez-Díaz, Carlos Franco-Muñoz, Jose A. Usme-Ciro, Gloria Puerto, Nicolas D. Franco-Sierra, Maily A. Gonzalez, Zulma M. Cucunubá, Christian Julian Villabona-Arenas, Liz Villabona-Arenas, Sussy Echeverria, Astrid C. Flórez, Sergio Gomez-Rangel, Luz Dary Rodriguez, Juliana Barbosa, Erika Ospitia, Diana Marcela Walteros-Acero, Martha Lucia Ospina Martinez, Marcela Mercado-Reyes.                                                                                                                                                                                                                                           |

|                |                                                                                                                                                           |                                                                                                     |                                                                                                                                                                                                                                                                                                                                                                                                                                                                                                                                                                                                                                                                                           |
|----------------|-----------------------------------------------------------------------------------------------------------------------------------------------------------|-----------------------------------------------------------------------------------------------------|-------------------------------------------------------------------------------------------------------------------------------------------------------------------------------------------------------------------------------------------------------------------------------------------------------------------------------------------------------------------------------------------------------------------------------------------------------------------------------------------------------------------------------------------------------------------------------------------------------------------------------------------------------------------------------------------|
| EPI_ISL_457060 | University of Exeter                                                                                                                                      | COVID-19 Genomics UK (COG-UK) Consortium                                                            | Ben Temperton, Aaron Jeffries, Michelle Michelsen, Joanna Warwick-Dugdale, Audrey Farbos, Robyn Manley, Stephen Michell, Jane Masoli                                                                                                                                                                                                                                                                                                                                                                                                                                                                                                                                                      |
| EPI_ISL_457557 | Quadram Institute Bioscience                                                                                                                              | COVID-19 Genomics UK (COG-UK) Consortium                                                            | Dave J. Baker, Gemma L. Kay, Alp Aydin, Thanh Le-Viet, Steven Rudder, Ana P. Tedim, Anastasia Kolyva, Maria Diaz, Leonardo de Oliveira Martins, Nabil-Fareed Alikhan, Lizzie Meadows, Rachael Stanley, Ngozi Elumogo, Muhammed Yasir, Nicholas M. Thomson, Alexander J Trotter, Rachel Gilroy, Samuel Bloomfield, Claire Stuart, Andrew Bell, Reenesh Prakash, Samir Derवेशic, Alison E. Mather, John Wain, Mark Webber, Andrew J. Page, Justin O'Grady                                                                                                                                                                                                                                   |
| EPI_ISL_458033 | King Institute of Preventive Medicine & Research                                                                                                          | CSIR-Centre for Cellular and Molecular Biology                                                      | K.Kaveri, S.Sivasubramanian, S.Vennila, P.Padmapriya, R.Kiruba, S.Magesh, G. Dhinakar Raj, G. Ravikumar, P. Azhahianambi, K Thangaraj, Lamuk Zaveri, Shagufita Khan, Namami Gaur, Sakshi Shambhavi, Tulasi Nagabandi, Purushotham Vodnala, Payel Mukherjee, Sofia Banu, Priya Singh, Dhiviya Vedagiri, Divya Gupta, Vishal Sah, Santosh Kumar Kuncha, Krishnan Harinivas Harshan, Archana Bharadwaj Siva, Karthik Bharadwaj Tallapaka, Rakesh K Mishra, Divya Tej Sowpati                                                                                                                                                                                                                 |
| EPI_ISL_458085 | Laboratorio Biologia Molecolare Sars Cov2 - UOC<br>Laboratorio Analisi - Servizio Medicina di Laboratorio ,<br>Ospedale "San Francesco" - ATS- ASSL Nuoro | Laboratorio specialistico UOC Ematologia - Ospedale<br>"San Francesco" - ATS-ASSL Nuoro             | Piras Giovanna, Fancello Tatiana, Asproni Rosanna, Fiamma Maura, Monne Maria Itria, Toja Alessandro, Sanna Filomena, Floris Anna Rita, Sulis Vincenzo, Palmas Angelo Domenico, Casu Gavino, Lo Maglio Iana, Mameili Giuseppe.                                                                                                                                                                                                                                                                                                                                                                                                                                                             |
| EPI_ISL_458560 | Department of Pathology, University of Cambridge                                                                                                          | Wellcome Sanger Institute for the COVID-19 Genomics UK (COG-UK) consortium                          | Luke W Meredith, M. Estée Török , Myra Hosmillo, William L. Hamilton, Martin D. Curran, Theresa Feltwell, Grant Hall, Anna Yakovleva, Fahad A Khokhar, Charlotte J. Houldcroft, Laura G Caller, Aminu S. Jahun, Sarah L. Caddy, Ian Goodfellow; and Alex Alderton, Roberto Amato, Sonia Goncalves, Ewan Harrison, David K. Jackson, Ian Johnston, Dominic Kwiatkowski, Cordelia Langford, John Sillitoe on behalf of the Wellcome Sanger Institute COVID-19 Surveillance Team ( <a href="http://www.sanger.ac.uk/covid-team">http://www.sanger.ac.uk/covid-team</a> )                                                                                                                     |
| EPI_ISL_458660 | NU-OMICS DNA Sequencing research facility,<br>Northumbria University                                                                                      | Wellcome Sanger Institute for the COVID-19 Genomics UK (COG-UK) consortium                          | Chris Duncan, Shea Waugh, Shirelle Burton-Fanning, Gary Eltringham, Jennifer Collins, Brendan Payne, Yusri Taha, Emma Swindells, Jane Greenaway, Edward Barton, Garren Scott, Debra Padgett, Clive Graham, Sarah Essex, Steve Ligget, Paul Baker, Lynn Dover, Wen Yew, Gary Black, John Allan, Joshua Loh, Greg Young, Matthew Bashton, Andrew Nelson, Darren Smith and Alex Alderton, Roberto Amato, Sonia Goncalves, Ewan Harrison, David K. Jackson, Ian Johnston, Dominic Kwiatkowski, Cordelia Langford, John Sillitoe on behalf of the Wellcome Sanger Institute COVID-19 Surveillance Team ( <a href="http://www.sanger.ac.uk/covid-team">http://www.sanger.ac.uk/covid-team</a> ) |
| EPI_ISL_459279 | Department of Pathology, University of Cambridge                                                                                                          | Wellcome Sanger Institute for the COVID-19 Genomics UK (COG-UK) consortium                          | Luke W Meredith, M. Estée Török , Myra Hosmillo, William L. Hamilton, Martin D. Curran, Theresa Feltwell, Grant Hall, Anna Yakovleva, Fahad A Khokhar, Charlotte J. Houldcroft, Laura G Caller, Aminu S. Jahun, Sarah L. Caddy, Ian Goodfellow; and Alex Alderton, Roberto Amato, Sonia Goncalves, Ewan Harrison, David K. Jackson, Ian Johnston, Dominic Kwiatkowski, Cordelia Langford, John Sillitoe on behalf of the Wellcome Sanger Institute COVID-19 Surveillance Team ( <a href="http://www.sanger.ac.uk/covid-team">http://www.sanger.ac.uk/covid-team</a> )                                                                                                                     |
| EPI_ISL_459872 | Kingston Health Sciences Center                                                                                                                           | Queen's Genomics Lab at Ongwanada (Q-GLO)                                                           | Sjaarda CP, Rustom N, Huang D, Perez-Patrigeon S, Hudson ML, Wong H, Guan H, Ayub M, Soares CN, Colautti R, Evans GA, Sheth P                                                                                                                                                                                                                                                                                                                                                                                                                                                                                                                                                             |
| EPI_ISL_459962 | Centogene AG                                                                                                                                              | Centogene AG                                                                                        | Prof. Dr. Peter Bauer, Dr. Krishna Kumar Kandaswamy                                                                                                                                                                                                                                                                                                                                                                                                                                                                                                                                                                                                                                       |
| EPI_ISL_459965 | Institut Pasteur du Maroc                                                                                                                                 | Institut Pasteur du Maroc                                                                           | Marion Barbet, Sylvie Behillil, Méline Bizard, Angela Brisebarre, Camille Capel, Etienne Simon-Lorière, Vincent Enouf, Maud Vanpeene, Sylvie van der Werf, Latifa Anga, Abdellah Fauzi, Anass Abbad, Mijid Eloualid, Jalal Nourill, Anderrahmane Maaroufi                                                                                                                                                                                                                                                                                                                                                                                                                                 |
| EPI_ISL_461566 | Department of Pathology, University of Cambridge                                                                                                          | COVID-19 Genomics UK (COG-UK) Consortium                                                            | Luke W Meredith, M. Estée Török, Myra Hosmillo, William L. Hamilton, Martin D. Curran, Theresa Feltwell, Grant Hall, Anna Yakovleva, Fahad A Khokhar, Charlotte J. Houldcroft, Laura G Caller, Aminu S. Jahun, Sarah L. Caddy, Ian Goodfellow                                                                                                                                                                                                                                                                                                                                                                                                                                             |
| EPI_ISL_462095 | National Institute of Laboratory Medicine and Referral Center                                                                                             | Genomic Research Lab, BCSIR                                                                         | Abu Sayeed Mohammad Mahmud, Mohammad Samir Uzzaman, Eshrar Osman, Md. Ahasan Habib, Tanjina Akhter Banu, Shahina Akter, Barna Goswami, Ifat Jahan, Md. Saddam Hossain, Tasnim Nafisa, Md. Maruf Ahmed Molla, Mahmuda Yeasmin, Asish Kumar Ghosh, Bayzid Bin Monir, Arifa Akram, Sheikh Md. Selim Al Din, Salek Ahmed Sajib, Utpal Chandra Ray, Md. Salim Khan                                                                                                                                                                                                                                                                                                                             |
| EPI_ISL_462480 | Institute of Human Genetics, Polish Academy of Sciences                                                                                                   | Institute of Human Genetics, Polish Academy of Sciences                                             | Szymon Hryhorowicz, Adam Ustaszewski, Emilia Lis, Marta Kaczmarek-Ry, Micha Witt, Andrzej Pawski                                                                                                                                                                                                                                                                                                                                                                                                                                                                                                                                                                                          |
| EPI_ISL_462793 | BCCDC Public Health Laboratory                                                                                                                            | BCCDC Public Health Laboratory                                                                      | Harrigan, Prystajczyk, Krajdien, Lee, Kamelian, Lapointe, Choi, Hoang, Sekirov, Levett, Tyson, Li, Gilmour                                                                                                                                                                                                                                                                                                                                                                                                                                                                                                                                                                                |
| EPI_ISL_462990 | University Clinical Centre of the Republic of Srpska                                                                                                      | University of Sarajevo, Veterinary Faculty                                                          | Teufik, G., Šejla, G., Toni, E., Maja, T., Mirsada, H., Aida, K., Alma, Š.A.                                                                                                                                                                                                                                                                                                                                                                                                                                                                                                                                                                                                              |
| EPI_ISL_462992 | Nigerian Institute of Medical Research                                                                                                                    | Nigerian Institute of Medical Research                                                              | Saibu, J.O., Onwuamah, C.K., Okwuraiwe, A.P., Amoo, O.S., Salu, O.B., Ige, F.A., Liboro, G., Odewale, E., Adesegun, A., Abosede, O., Ahmed, R., Sokei, J., Oyefolu, A., Adegbola, R., Salako, B., Omilabu, S. and Audu, R.                                                                                                                                                                                                                                                                                                                                                                                                                                                                |
| EPI_ISL_463649 | Washington State Department of Health                                                                                                                     | Seattle Flu Study                                                                                   | Chu et al                                                                                                                                                                                                                                                                                                                                                                                                                                                                                                                                                                                                                                                                                 |
| EPI_ISL_463741 | Department of Molecular Virology, Cyprus Institute of Neurology and Genetics                                                                              | Department of Molecular Virology, Cyprus Institute of Neurology and Genetics                        | Jan Richter, George Krashias, Christina Tryfonos, Stavros Bashiardes, Dana Koptides, Christina Christodoulou                                                                                                                                                                                                                                                                                                                                                                                                                                                                                                                                                                              |
| EPI_ISL_464022 | Unity Health Toronto                                                                                                                                      | Ontario Institute for Cancer Research                                                               | Ramzi Fattouh, Larissa M. Matukas, Mark Downing, Annette Gower, Karel Boissinot, Samira Mubareka, TIBDN, Ilanca Lungu, Bernard Lam, Jeremy Johns, Paul Krzyzanowski, Richard de Borja, Philip Zuzarte, Jared Simpson                                                                                                                                                                                                                                                                                                                                                                                                                                                                      |
| EPI_ISL_464153 | National Health Laboratory Service (NHLS), Tygerberg                                                                                                      | Division of Medical Virology, Stellenbosch University and National Health Laboratory Service (NHLS) | Susan Engelbrecht, Kayla Delaney, Bronwyn Kleinhans, Houriyah Tegally, Eduan Wilkindon, Gert van Zyl, Wolfgang Preiser, Tulio de Oliveira                                                                                                                                                                                                                                                                                                                                                                                                                                                                                                                                                 |
| EPI_ISL_464334 | Respiratory Virus Unit, Microbiology Services Colindale, Public Health England                                                                            | Respiratory Virus Unit, Microbiology Services Colindale, Public Health England                      | PHE Covid Sequencing Team                                                                                                                                                                                                                                                                                                                                                                                                                                                                                                                                                                                                                                                                 |



We gratefully acknowledge the following Authors from the Originating laboratories responsible for obtaining the specimens, as well as the Submitting laboratories where the genome data were generated and shared via GISAID, on which this research is based.

All Submitters of data may be contacted directly via [www.gisaid.org](http://www.gisaid.org)

**Accession ID**

EPI\_ISL\_755641

**Originating Laboratory**

Instituto Adolfo Lutz - Regional de Santo Andre

**Submitting Laboratory**

Instituto Adolfo Lutz, Interdisciplinary Procedures Center,  
Strategic Laboratory

**Authors**

Claudio Tavares Sacchi, Claudia Regina Gonçalves, Erica Valessa Ramos Gomes, Karoline Rodrigues Campos



We gratefully acknowledge the following Authors from the Originating laboratories responsible for obtaining the specimens, as well as the Submitting laboratories where the genome data were generated and shared via GISAID, on which this research is based.

All Submitters of data may be contacted directly via [www.gisaid.org](http://www.gisaid.org)

**Accession ID**

EPI\_ISL\_754079

**Originating Laboratory**

National Public Health Laboratory, National Centre for  
Infectious Diseases

**Submitting Laboratory**

National Public Health Laboratory, National Centre for  
Infectious Diseases

**Authors**

Tze Minn Mak, Sophie Octavia, Zhenyang Zhou, Lin Cui, Raymond Tzer Pin Lin
